# Supplementary material
Source: PubMed Central journal article supplement (PMC5739942)
Supplement: NIHMS921642-supplement-SUpporting_Information.pdf [file NIHMS921642-supplement-SUpporting_Information.pdf]

# Asymmetric Traceless Petasis Borono-Mannich Reactions of Enals: Reductive Transpositions of Allylic Diazenes

Yao Jiang,<sup>[a]</sup> Regan J. Thomson\*<sup>[b]</sup> and Scott E. Schaus\*<sup>[a]</sup>

<sup>[a]</sup> *Department of Chemistry, Center for Molecular Discovery*

*Boston University*

*24 Cummington Mall, Boston, Massachusetts, 02215, United States*

*E-mail: seschaus@bu.edu*

<sup>[b]</sup> *Department of Chemistry*

*Northwestern University*

*2145 Sheridan Road, Evanston, Illinois, 60208, United States*

*E-mail: r-thomson@northwestern.edu*

## Table of Contents

|    |                                                                        |    |
|----|------------------------------------------------------------------------|----|
| 1. | General Information.....                                               | 3  |
| 2. | Experimental Procedure and Characterization of Products.....           | 4  |
| a. | Reaction Optimization.....                                             | 4  |
| b. | Synthesis of Enals .....                                               | 7  |
| c. | General Procedure to Prepare Racemic 1,4-Dienes (±)-5, (±)-7.....      | 11 |
| d. | General Procedure to Prepare Enantioenriched 1,4-Dienes 5.....         | 12 |
| e. | General Procedure for Hydroboration/Oxidation of 1,4-Dienes.....       | 12 |
| f. | Analytical Data for 1,4-Dienes 5.....                                  | 13 |
| g. | General Procedure to Prepare Enantioenriched 1,4-Dienes 7.....         | 19 |
| h. | Analytical Data for 1,4-Dienes 7.....                                  | 20 |
| i. | General Procedure to Prepare Racemic 1,4-Dienes (±)-11 and (±)-12..... | 27 |
| j. | General Procedure to Prepare Enantioenriched 1,4-Dienes 11 and 12..... | 28 |
| k. | Analytical Data for 1,4-Dienes 11 and 12.....                          | 28 |
| l. | General Procedure to Prepare Racemic 1,4-Dienes (±)-14.....            | 32 |

|    |                                                                 |     |
|----|-----------------------------------------------------------------|-----|
| m. | General Procedure to Prepare Enantioenriched 1,4-Dienes 14..... | 33  |
| n. | Analytical Data for 1,4-Dienes 14.....                          | 33  |
| o. | Absolute Stereochemistry Determination for 1,4-Dienes.....      | 40  |
| 3. | References .....                                                | 41  |
| 4. | NMR Spectra .....                                               | 42  |
| 5. | HPLC Traces .....                                               | 107 |

## 1. General Information.

All  $^1\text{H}$  NMR and  $^{13}\text{C}$  NMR spectra were recorded using Varian Unity Plus 500 MHz spectrometer at ambient temperature in  $\text{CDCl}_3$  (Cambridge Isotope Laboratories, Inc.). Chemical shifts in  $^1\text{H}$  NMR spectra are reported in parts per million from tetramethylsilane with the solvent resonance as the internal standard (deuteriochloroform:  $\delta$  7.26 ppm). Data are reported as follows: chemical shift, multiplicity (app = apparent, br = broad, par obsc = partially obscure, ovrlp = overlapping, s = singlet, d = doublet, t = triplet, q = quartet, m = multiplet), coupling constant (Hz), and integration. Chemical shifts in  $^{13}\text{C}$  NMR are reported in ppm from tetramethylsilane with the solvent resonance as the internal standard (deuteriochloroform:  $\delta$  77.0 ppm). All  $^{13}\text{C}$  NMR spectra were recorded with complete proton decoupling. Chemical shifts in  $^{19}\text{F}$  NMR spectra are reported in parts per million using 0.05%  $\alpha$ ,  $\alpha$ ,  $\alpha$ -trifluorotoluene in deuterobenzene as the external standard. Infrared spectra were recorded on a Nicolet Nexus 670 FT-IR ESP spectrophotometer. High-resolution mass spectra were obtained using a Waters Q-TOF mass spectrometer. LC-MS experiments were performed using an Agilent Single-Quad LC/MSD VL with single-quad low resolution (1 decimal place) capable of both ESI positive and negative modes using flow injection analysis. GC-MS experiments were performed using an Agilent GC-MS 6890N equipped with a MS detector up to 800 m/z. The ionization is electron impact (EI) and software is ChemStation. Optical rotations were recorded on an AUTOPOL III digital polarimeter at 589 nm, and were reported as  $[\alpha]_{\text{D}}^{25}$  (concentration in grams/100 mL solvent). Chiral HPLC analysis was performed using an Agilent 1100 series HPLC System with a diode array detector. Chiral columns include Chiralcel@OD (Chiral Technologies Inc., 25 cm  $\times$  4.6 mm I.D.), Chiralpak@AD-H (Chiral Technologies Inc., 25 cm  $\times$  4.6 mm I.D.) and Chiralpak@IA (Chiral Technologies Inc., 25 cm  $\times$  4.6 mm I.D.). Analytical thin layer chromatography was performed using EMD 0.25 mm silica gel 60-F plates. Flash column chromatography was performed on Sorbent Technologies 60 Å silica gel. Yields refer to chromatographically and spectroscopically pure compounds, unless otherwise stated. Catalyst loadings were calculated with respect to the amount of boronates. All reactions were carried out in oven-dried glassware under an argon or nitrogen atmosphere unless otherwise noted. HPLC grade THF, dichloromethane,  $\text{Et}_2\text{O}$  and toluene were purchased from Fisher and VWR and were purified and dried by passing through as PURE SOLV<sup>®</sup> solvent purification system (Innovative Technology Inc.). The chiral biphenol catalysts were prepared according to the known literature.<sup>[1]</sup> Allyl and crotyl boronates were made following disclosed procedures.<sup>[2]</sup> Hydrazides were synthesized according to published protocols.<sup>[3]</sup> All other reagents were purchased from commercial suppliers and used without further purification.

## 2. Experimental Procedure and Characterization of Products

### a. Reaction Optimization

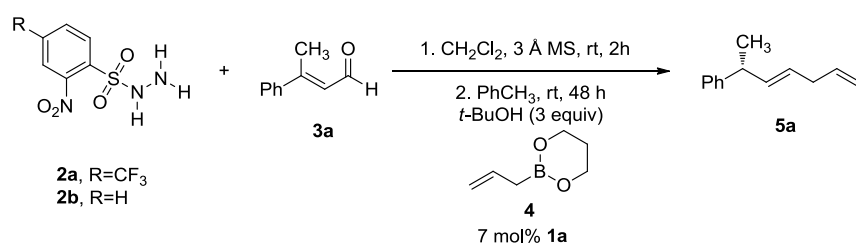

| Entry            | Variation from the Standard Procedure                            | Yield(%) <sup>[a]</sup> | e.r. <sup>[b]</sup> |
|------------------|------------------------------------------------------------------|-------------------------|---------------------|
| 1 <sup>[c]</sup> | —                                                                | 83                      | 98:2                |
| 2                | Hydrazine <b>2b</b> instead of <b>2a</b>                         | 15                      | —                   |
| 3                | Hydrazine <b>2b</b> instead of <b>2a</b> , 96 h                  | 32                      | 96:4                |
| 4                | Hydrazine <b>2b</b> instead of <b>2a</b> , 50 °C                 | 5                       | —                   |
| 5                | Hydrazine <b>2b</b> instead of <b>2a</b> , microwave (10 W, 1 h) | 11                      | 96:4                |
| 6                | 10 mol% <b>1a</b>                                                | 85                      | 98:2                |
| 7                | 3 mol% <b>1a</b>                                                 | 45                      | 90:10               |
| 8                | No <i>t</i> -BuOH                                                | 80                      | 81:19               |

[a] Isolated yield. [b] Determined by chiral HPLC analysis. [c] Reaction condition: aldehyde **3a** (0.4 mmol), hydrazide **2a** (0.4 mmol) and powdered 3 Å molecular sieves (200 mg) were mixed in CH<sub>2</sub>Cl<sub>2</sub> (1 mL) at room temperature for 2 h; CH<sub>2</sub>Cl<sub>2</sub> was removed; allylboronate **4** (0.6 mmol), 7 mol% catalyst **1a**, *t*-BuOH (1.2 mmol) were added. The reaction was allowed to stir at room temperature for 48 h, after which moment the crude mixture was subjected to purification to afford the 1,4-diene product **5a**.

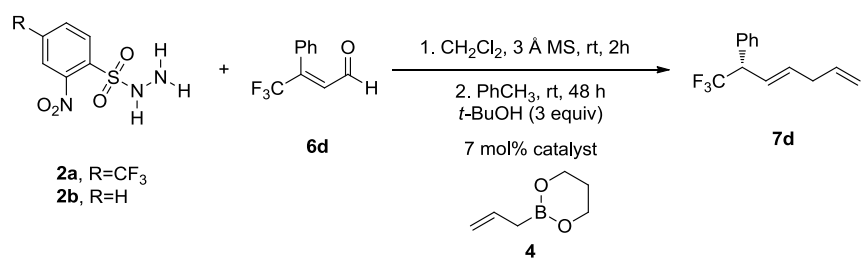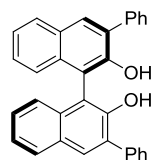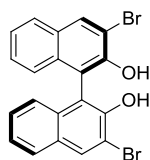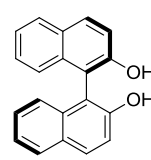

| Entry            | Hydrazide | Catalyst  | Yield(%) <sup>[a]</sup> | e.r. <sup>[b]</sup> |
|------------------|-----------|-----------|-------------------------|---------------------|
| 1                | <b>2a</b> | <b>1a</b> | 10                      | —                   |
| 2                | <b>2a</b> | <b>1c</b> | 84                      | 78:22               |
| 3                | <b>2a</b> | <b>1b</b> | 57                      | 91:9                |
| 4                | <b>2b</b> | <b>1a</b> | 31                      | 50:50               |
| 5                | <b>2b</b> | <b>1b</b> | 86                      | 92:8                |
| 6 <sup>[c]</sup> | <b>2b</b> | <b>1b</b> | 85                      | 97:3                |

Reaction condition: aldehyde (0.4 mmol), hydrazide (0.4 mmol) and powdered 3 Å molecular sieves (200 mg) were mixed in  $\text{CH}_2\text{Cl}_2$  (1 mL) at room temperature for 2 h;  $\text{CH}_2\text{Cl}_2$  was removed; allylboronate (0.6 mmol), catalyst,  $t\text{-BuOH}$  were added. [a] Isolated yield. [b] Determined by chiral HPLC analysis. [c] 5 equivalents of  $t\text{-BuOH}$  were employed under neat conditions.

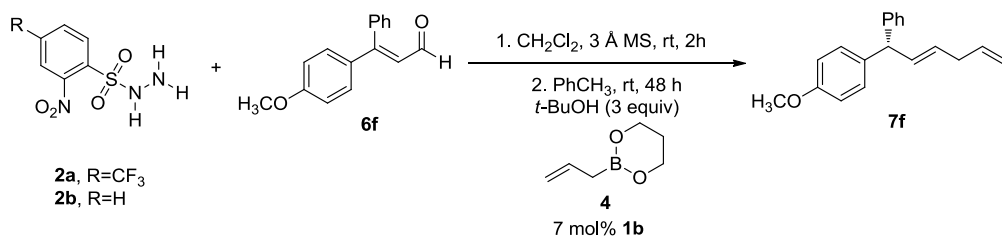

| Entry            | Variation from the Standard Procedure    | Yield(%) <sup>[a]</sup> | e.r. <sup>[b]</sup> |
|------------------|------------------------------------------|-------------------------|---------------------|
| 1 <sup>[c]</sup> | —                                        | 86                      | 98:2                |
| 2                | Hydrazine <b>2a</b> instead of <b>2b</b> | 45                      | 98:2                |
| 3                | Catalyst <b>1a</b> instead of <b>1b</b>  | 33                      | 50:50               |
| 4                | 40 °C, 24 h                              | 56                      | 96:4                |
| 6                | 3 mol% <b>1b</b>                         | 59                      | 94:6                |

[a] Isolated yield. [b] Determined by chiral HPLC analysis. [c] Reaction condition: aldehyde **6f** (0.4 mmol), hydrazide **2b** (0.4 mmol) and powdered 3 Å molecular sieves (200 mg) were mixed in CH<sub>2</sub>Cl<sub>2</sub> (1 mL) at room temperature for 2 h; CH<sub>2</sub>Cl<sub>2</sub> was removed; allylboronate **4** (0.6 mmol), 7 mol% catalyst **1b**, *t*-BuOH (1.2 mmol) were added. The reaction was allowed to stir at room temperature for 48 h, after which moment the crude mixture was subjected to purification to afford the 1,4-diene product **7f**.

## b. Synthesis of Enals

$\beta$ -Aryl- $\beta$ -alkyl enals were synthesized from the corresponding aryl alkyl ketones by a three-step sequence: Horner-Wadsworth-Emmons olefination/DIBAL-H reduction/MnO<sub>2</sub> oxidation.<sup>[4]</sup>

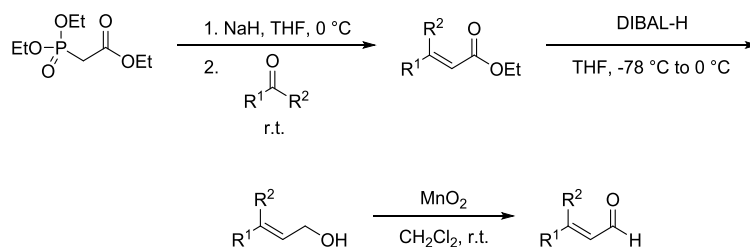

Step 1: To a 100-mL round bottom flask containing NaH (20 mmol, 60% mineral dispersion) and anhydrous THF (40 mL) at 0 °C was added triethyl phosphonoacetate (21.5 mmol) dropwise. The reaction mixture was allowed to stir for 30 min at the same temperature, followed by a dropwise addition of a solution of the corresponding ketone (20 mmol, in 20 mL anhydrous THF). The reaction mixture was stirred while being monitored by TLC until the ketone was consumed. Water (40 mL) was slowly added in and the reaction mixture was extracted with EtOAc (3  $\times$  100 mL). The organic layers were combined and dried over Na<sub>2</sub>SO<sub>4</sub>, filtered, and concentrated under reduced pressure. The crude residue was subjected to flash chromatography (hexanes/EtOAc: 99/1  $\rightarrow$  95/5) to afford the corresponding  $\alpha,\beta$ -unsaturated ester in an isomerically pure form.

Step 2: The unsaturated ester (20 mmol) was dissolved in 40 mL dry THF under argon before being cooled to -78 °C. DIBAL-H (1.0 M in toluene, 2.4 equiv) was added dropwise over 5 min and the resulting mixture was stirred at -78 °C for 30 min. The reaction mixture was then allowed to warm to 0 °C and stirred for another 30 min. At the same temperature, the reaction was quenched by a dropwise addition of 2 M aqueous HCl. The organic layer was separated and the aqueous layer was extracted with EtOAc (3  $\times$  100 mL). The combined organic layers were dried over Na<sub>2</sub>SO<sub>4</sub>, filtered, and concentrated under reduced pressure. The crude residue was subjected to flash chromatography (hexanes/EtOAc: 4/1) to afford the corresponding allylic alcohol in an isomerically pure form.

Step 3: To a 100-mL round bottom flask containing the allylic alcohol (10 mmol) obtained above, was added activated MnO<sub>2</sub> (5 equiv) and anhydrous CH<sub>2</sub>Cl<sub>2</sub> (25 mL) at room temperature. The reaction mixture was then allowed to stir for at least 24 h, while being monitored by TLC. After complete consumption of the starting material, the reaction mixture was filtered through a pad of celite and rinsed by CH<sub>2</sub>Cl<sub>2</sub>. The resulting filtrate was concentrated under reduced pressure. The crude residue was subjected to flash chromatography (hexanes/EtOAc: 99/1  $\rightarrow$  95/5) to afford the corresponding  $\beta$ -aryl- $\beta$ -alkyl enal in an isomerically pure form.

(*E*)-3-Phenylbut-2-enal (**3a**) was synthesized using acetophenone and all spectra were in agreement with reported data.<sup>[5]</sup> Other  $\beta$ -methyl enals were synthesized in the same manner using corresponding aryl methyl ketones. Geranial was synthesized by direct MnO<sub>2</sub> oxidation of geraniol.<sup>[6]</sup>

(*E*)-3-Phenylpent-2-enal (**6a**) was synthesized using propiophenone following the three-step synthetic sequence. All spectra were in agreement with reported data.<sup>[7]</sup>

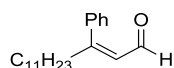

**(Z)-3-Phenyltetradec-2-enal (6b)**

Dodecanophenone was used following the above-mentioned three-step synthetic sequence. (Z)-Geometry was determined by NOESY:

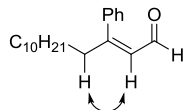

**<sup>1</sup>H NMR** (500 MHz, CDCl<sub>3</sub>) δ 9.44 (d, *J* = 8.2 Hz, 1H), 7.43 – 7.37 (m, 3H), 7.29 – 7.22 (m, 2H), 6.10 (d, *J* = 8.2 Hz, 1H), 2.57 (t, *J* = 7.5 Hz, 2H), 1.46 – 1.38 (m, 2H), 1.33 – 1.19 (m, 16H), 0.88 (t, *J* = 6.9 Hz, 3H).

**<sup>13</sup>C NMR** (126 MHz, CDCl<sub>3</sub>) δ 193.8, 166.8, 137.8, 128.9, 128.5, 128.4, 128.3, 39.7, 31.9, 29.6, 29.4, 29.3, 29.3, 29.1, 27.4, 22.7, 14.1.

**ESIMS** found 287.2 (calculated for [C<sub>20</sub>H<sub>31</sub>O]<sup>+</sup>: 287.2)

**(Z)-4-Methyl-3-phenylpent-2-enal (6c)** and **(E)-4-methyl-3-phenylpent-2-enal [(E)-8]** were synthesized divergently from isobutyrophenone following the three-step synthetic sequence. All spectra for the corresponding intermediates were in agreement with reported data.<sup>[8]</sup> The final (Z)- and (E)-enals can be prepared as single isomers. All spectra were in agreement with reported data.<sup>[9]</sup>

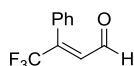

**(E)-4,4,4-Trifluoro-3-phenylbut-2-enal (6d)**

2,2,2-Trifluoroacetophenone was used following the above-mentioned three-step synthetic sequence. All spectra for the intermediates [ethyl (E)-4,4,4-trifluoro-3-phenylbut-2-enoate and (E)-4,4,4-trifluoro-3-phenylbut-2-en-1-ol] were in agreement with reported data.<sup>[10]</sup>

**<sup>1</sup>H NMR** (500 MHz, CDCl<sub>3</sub>) δ 9.55 (d, *J* = 7.5 Hz, 1H), 7.56 – 7.46 (m, 3H), 7.42 – 7.38 (m, 2H), 6.64 (d, *J* = 7.5 Hz, 1H).

**<sup>13</sup>C NMR** (126 MHz, CDCl<sub>3</sub>) δ 191.5, 147.8 (q, *J* = 31.5 Hz), 130.8, 130.5, 129.9, 128.8, 127.8, 122.7 (q, *J* = 275.0 Hz).

**ESIMS** found 201.0 (calculated for [C<sub>10</sub>H<sub>8</sub>F<sub>3</sub>O]<sup>+</sup>: 201.0)

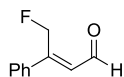

**(Z)-4-Fluoro-3-phenylbut-2-enal (6e)**

2-Fluoro-1-phenylethanone<sup>[11]</sup> was used following the above-mentioned three-step synthetic sequence. All spectra for intermediates [ethyl (Z)-4-fluoro-3-phenylbut-2-enoate and (Z)-4-fluoro-3-phenylbut-2-en-1-ol] were in agreement with reported data.<sup>[12]</sup>

**<sup>1</sup>H NMR** (500 MHz, CDCl<sub>3</sub>) δ 10.22 (dd, *J* = 7.2, 1.0 Hz, 1H), 7.55 – 7.48 (m, 2H), 7.47 – 7.41 (m, 3H), 6.42 (dd, *J* = 7.2, 1.0 Hz, 1H), 5.73 (d, *J* = 47.1 Hz, 2H).

**<sup>13</sup>C NMR** (126 MHz, CDCl<sub>3</sub>) δ 190.4 (d, *J* = 4.0 Hz), 153.2 (d, *J* = 14.5 Hz), 136.5 (d, *J* = 3.5 Hz), 130.4, 129.6 (d, *J* = 2.9 Hz), 129.0, 126.9, 79.5 (d, *J* = 171.4 Hz).

**ESIMS** found 165.1 (calculated for [C<sub>10</sub>H<sub>10</sub>FO]<sup>+</sup>: 165.1)



$\beta,\beta$ -Diaryl enals were synthesized from the corresponding ethyl 3-arylpropiolate and aryl boronic acid by a three-step sequence:<sup>[13]</sup> Cu-catalyzed conjugate addition<sup>[14]</sup>/DIBAL-H reduction/ $\text{MnO}_2$  oxidation.

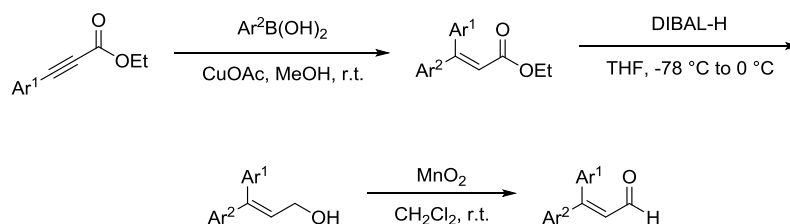

Step 1: In a 100-mL round bottom flask ethyl 3-arylpropiolate (20 mmol, 1 equiv), aryl boronic acid (3 equiv), and CuOAc (2 mol%) were dissolved in 40 mL MeOH. The solution was degassed by three freeze-pump-thaw cycles and then stirred overnight at room temperature. The resulting mixture was filtered off Celite and the solvent was removed under reduced pressure. The crude residue was subjected to flash chromatography (hexanes/EtOAc: 95/5) to afford the corresponding  $\alpha,\beta$ -unsaturated ester in an isomerically pure form.

Step 2: The unsaturated ester (15 mmol) was dissolved in 40 mL dry THF under argon before being cooled to  $-78$  °C. DIBAL-H (1.0 M in toluene, 2.4 equiv) was added dropwise over 5 min and the resulting mixture was stirred at  $-78$  °C for 30 min. The reaction mixture was then allowed to warm to 0 °C and stirred for another 30 min. At the same temperature, the reaction was quenched by a dropwise addition of 2 M aqueous HCl. The organic layer was separated and the aqueous layer was extracted with EtOAc ( $3 \times 100$  mL). The combined organic layers were dried over  $\text{Na}_2\text{SO}_4$ , filtered, and concentrated under reduced pressure. The crude residue was subjected to flash chromatography (hexanes/EtOAc: 4/1) to afford the corresponding allylic alcohol in an isomerically pure form.

Step 3: To a 100-mL round bottom flask containing the allylic alcohol (10 mmol) obtained above, was added activated  $\text{MnO}_2$  (5 equiv) and anhydrous  $\text{CH}_2\text{Cl}_2$  (25 mL) at room temperature. The reaction mixture was then allowed to stir for at least 24 h, while being monitored by TLC. After complete consumption of the starting material, the reaction mixture was filtered through a pad of celite and rinsed by  $\text{CH}_2\text{Cl}_2$ . The resulting filtrate was concentrated under reduced pressure. The crude residue was subjected to flash chromatography (hexanes/EtOAc: 99/1  $\rightarrow$  95/5) to afford the corresponding  $\beta$ -branched enal in an isomerically pure form.

(*E*)-3-(4-Methoxyphenyl)-3-phenylacrylaldehyde (**6f**) was synthesized using ethyl phenylpropiolate and 4-methoxyphenylboronic acid. (*E*)-3-(Naphthalen-2-yl)-3-phenylacrylaldehyde (**6j**) was synthesized using ethyl phenylpropiolate and 2-naphthylboronic acid. All spectra for both substrates were in agreement with reported data.<sup>[13]</sup>

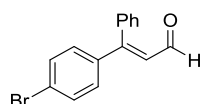

**(*E*)-3-(4-Bromophenyl)-3-phenylacrylaldehyde (6g)**

Ethyl phenylpropiolate and 4-bromophenylboronic acid were used following the above-mentioned three-step synthetic sequence.

<sup>1</sup>H NMR (500 MHz,  $\text{CDCl}_3$ )  $\delta$  9.52 (d,  $J = 7.9$  Hz, 1H), 7.56 – 7.39 (m, 5H), 7.32 – 7.25 (m, 2H), 7.25

– 7.17 (m, 2H), 6.56 (d,  $J = 7.9$  Hz, 1H).

$^{13}\text{C}$  NMR (126 MHz,  $\text{CDCl}_3$ )  $\delta$  193.2, 160.8, 138.6, 136.1, 131.9, 130.7, 130.1, 129.7, 128.5, 127.4, 125.1.

**ESIMS** found 287.0, 289.0 (calculated for  $[\text{C}_{15}\text{H}_{12}\text{BrO}]^+$ : 287.0)

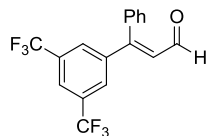

**(E)-3-(3,5-Bis(trifluoromethyl)phenyl)-3-phenylacrylaldehyde (6h)**

Ethyl phenylpropiolate and (3,5-bis(trifluoromethyl)phenyl)boronic acid were used following the above-mentioned three-step synthetic sequence.

$^1\text{H}$  NMR (500 MHz,  $\text{CDCl}_3$ )  $\delta$  9.59 (d,  $J = 7.7$  Hz, 1H), 7.94 (s, 1H), 7.78 (s, 2H), 7.58 – 7.42 (m, 3H), 7.38 – 7.26 (m, 2H), 6.61 (d,  $J = 7.7$  Hz, 1H).

$^{13}\text{C}$  NMR (126 MHz,  $\text{CDCl}_3$ )  $\delta$  192.5, 158.5, 142.2, 135.0, 132.2 (q,  $J = 33.9$  Hz), 130.6, 130.3, 129.3, 128.9, 128.4, 123.6, 122.9 (d,  $J = 272.9$  Hz).

**ESIMS** found 345.1 (calculated for  $[\text{C}_{17}\text{H}_{11}\text{F}_6\text{O}]^+$ : 345.1)

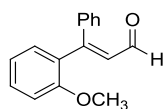

**(E)-3-(2-Methoxyphenyl)-3-phenylacrylaldehyde (6i)**

Ethyl phenylpropiolate and 2-methoxyphenylboronic acid were used following the above-mentioned three-step synthetic sequence.

$^1\text{H}$  NMR (500 MHz,  $\text{CDCl}_3$ )  $\delta$  9.62 (d,  $J = 8.1$  Hz, 1H), 7.44 – 7.33 (m, 4H), 7.31 – 7.24 (m, 2H), 7.12 – 7.06 (m, 1H), 6.98 – 6.90 (m, 2H), 6.59 (d,  $J = 8.1$  Hz, 1H), 3.68 (s, 3H).

$^{13}\text{C}$  NMR (126 MHz,  $\text{CDCl}_3$ )  $\delta$  194.0, 159.8, 157.6, 138.1, 131.4, 131.1, 130.4, 130.2, 129.5, 129.0, 128.0, 120.5, 111.7, 55.5.

**ESIMS** found 239.1 (calculated for  $[\text{C}_{16}\text{H}_{15}\text{O}_2]^+$ : 239.1)

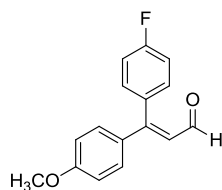

**(Z)-3-(4-Fluorophenyl)-3-(4-methoxyphenyl)acrylaldehyde (6k)**

3-(4-Fluorophenyl)propionaldehyde<sup>[13]</sup> and 4-methoxyphenylboronic acid were used following the above-mentioned three-step synthetic sequence.

$^1\text{H}$  NMR (500 MHz,  $\text{CDCl}_3$ )  $\delta$  9.44 (d,  $J = 8.1$  Hz, 1H), 7.32 – 7.24 (m, 4H), 7.16 – 7.10 (m, 2H), 6.91 – 6.85 (m, 2H), 6.54 (d,  $J = 8.1$  Hz, 1H), 3.82 (s, 3H).

$^{13}\text{C}$  NMR (126 MHz,  $\text{CDCl}_3$ )  $\delta$  193.0, 163.3 (d,  $J = 249.9$  Hz), 161.8, 160.7, 132.9 (d,  $J = 3.5$  Hz), 132.5 (d,  $J = 8.3$  Hz), 131.7, 130.3, 125.8, 115.5 (d,  $J = 21.7$  Hz), 114.1, 55.4.

**ESIMS** found 257.1 (calculated for  $[\text{C}_{16}\text{H}_{14}\text{FO}_2]^+$ : 257.1)

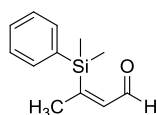

**(Z)-3-(Dimethyl(phenyl)silyl)but-2-enal (3g)**

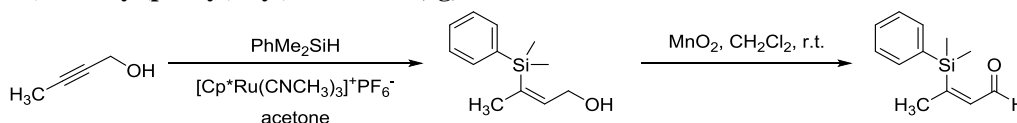

The synthesis of  $\beta$ -silyl enals was adapted from known literature.<sup>[15]</sup>  $[\text{Cp}^*\text{Ru}(\text{CNCH}_3)_3]^+\text{PF}_6^-$  (0.2 mol%) was added to a solution of 2-butyne-1-ol (25 mmol) and dimethylphenylsilane (30 mmol) in 25 mL acetone at 0 °C. The reaction mixture was warmed up to room temperature. After 30 min, the mixture was filtered off a pad of Celite and the filtrate was concentrated under reduced pressure. The crude residue was purified by column chromatography on silica gel using hexanes/EtOAc (2/1) as eluent to give allylic alcohol product in an isomerically pure form. To a 100-mL round bottom flask containing the allylic alcohol (10 mmol) obtained above, was added activated  $\text{MnO}_2$  (5 equiv) and anhydrous  $\text{CH}_2\text{Cl}_2$  (25 mL) at room temperature. The reaction mixture was then allowed to stir at the same temperature, while being monitored by TLC. After complete consumption of the starting material, the reaction mixture was filtered through a pad of celite and rinsed by  $\text{CH}_2\text{Cl}_2$ . The resulting filtrate was concentrated under reduced pressure. The crude residue was subjected to flash chromatography (hexanes/EtOAc: 95/5) to afford the corresponding (Z)- $\beta$ -silyl enal.

<sup>1</sup>H NMR (500 MHz,  $\text{CDCl}_3$ )  $\delta$  9.68 (d,  $J$  = 8.6 Hz, 1H), 7.53 – 7.46 (m, 2H), 7.43 – 7.33 (m, 3H), 6.54 (dq,  $J$  = 8.6, 1.6 Hz, 1H), 2.11 (d,  $J$  = 1.6 Hz, 3H), 0.54 (s, 6H).

<sup>13</sup>C NMR (126 MHz,  $\text{CDCl}_3$ )  $\delta$  192.9, 166.9, 142.9, 137.0, 133.6, 129.7, 128.3, 26.7, -0.9.

ESIMS found 205.1 (calculated for  $[\text{C}_{12}\text{H}_{17}\text{OSi}]^+$ : 205.1).

Non-branched enals **13a-13f** were commercially available and used without purification. (2*E*,4*E*)-5-Phenylpenta-2,4-dienal (**13g**) and (*E*)-5-phenylpent-2-enal (**13h**) were prepared according to known literature.<sup>[16]</sup>

**c. General Procedure to Prepare Racemic 1,4-Dienes ( $\pm$ )-5, ( $\pm$ )-7**

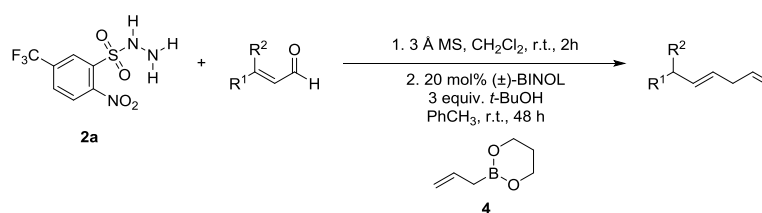

2-Nitro-4-(trifluoromethyl)benzenesulfonohydrazide (0.4 mmol), a  $\beta,\beta$ -disubstituted enal (0.4 mmol), and oven-dried 3 Å powdered molecular sieves (200 mg) were added to a 10-mL reaction vial equipped with a magnet stir bar. Dichloromethane (1.0 mL) was added to the vial and the reaction mixture was stirred at room temperature for 2 h, at which time the reaction mixture was concentrated first by rotary evaporation and then by static pressure vacuum (2 – 10 Torr) for 10 min. Racemic BINOL catalyst (0.12 mmol, 20 mol%), *tert*-butanol (3 equiv, 1.2 mmol) and allylboronate (1.5 equiv, 0.6 mmol) were added and rinsed into the solution with anhydrous toluene (0.2 mL). The reaction was applied to sonication for 10 min to facilitate dissolution. The vial was then sealed with a rubber septum and attached to a balloon

filled with argon. The mixture was allowed to stir at room temperature for 48 h, at which time the crude mixture was chromatographed on silica gel to afford the desired product.

#### d. General Procedure to Prepare Enantioenriched 1,4-Dienes 5

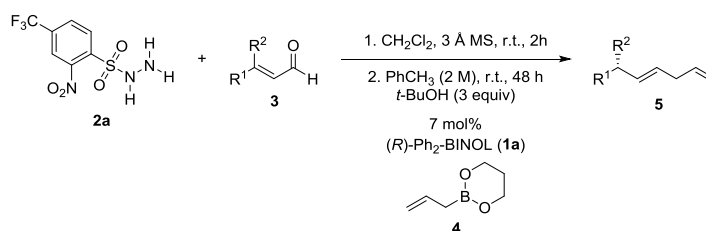

2-Nitro-4-(trifluoromethyl)benzenesulfonylhydrazide (0.4 mmol), a β-methyl enal (0.4 mmol), and oven-dried 3 Å powdered molecular sieves (200 mg) were added to a 10-mL reaction vial equipped with a magnetic stir bar. Dichloromethane (1.0 mL) was added to the vial and the reaction mixture was stirred at room temperature for 2 h, at which time the reaction mixture was concentrated first by rotary evaporation and then by static pressure vacuum (2 – 10 Torr) for 10 min. (*R*)-Ph<sub>2</sub>-BINOL (0.04 mmol, 7 mol%), *tert*-butanol (3 equiv, 1.2 mmol) and allylboronate (1.5 equiv, 0.6 mmol) were added and rinsed into the solution with anhydrous toluene (0.2 mL). The reaction was applied to sonication for 5 min to facilitate dissolution. The vial was then sealed with a rubber septum and attached to a balloon filled with argon. The mixture was allowed to stir at room temperature for 48 h, at which time the crude mixture was chromatographed on silica gel to afford the desired product.

#### e. General Procedure for Hydroboration/Oxidation of 1,4-Dienes

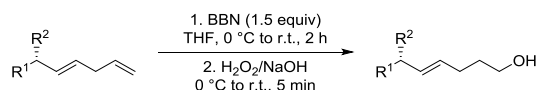

The 1,4-diene (0.25 mmol) was dissolved in dry THF (0.5 mL) under argon and cooled to 0 °C. 9-BBN (0.5 M in THF, 1.5 equiv) was added dropwise to the reaction, and the reaction was allowed to warm up to room temperature naturally. After one hour, the reaction was cooled to 0 °C. 3 M NaOH solution (0.25 mL) was added slowly to the reaction, followed by dropwise addition of H<sub>2</sub>O<sub>2</sub> (35% in water, 0.25 mL). The reaction was warmed to room temperature in 5 min. The reaction mixture was transferred to a separatory funnel using Et<sub>2</sub>O (5 mL) and H<sub>2</sub>O (5 mL). The organic layer was collected and the aqueous layer was extracted by Et<sub>2</sub>O (3 × 5 mL). The combined organic layers were dried with Na<sub>2</sub>SO<sub>4</sub>. Concentration under reduced pressure followed by flash column chromatography on silica gel afforded the desired compound.

## f. Analytical Data for 1,4-Dienes 5

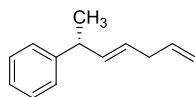

### (*R,E*)-Hepta-3,6-dien-2-ylbenzene (**5a**)

The substrate was run in 0.4 mmol scale following the general procedure and the crude mixture was purified by flash column chromatography with hexanes to afford the pure product as a colorless oil.

**Yield:** 57 mg, 83%.

**e.r.:** 98:2.

$[\alpha]_D^{22} = -4.2$  ( $c = 1.0$ ,  $\text{CHCl}_3$ ).

**HPLC Analysis**, this compound was converted to the corresponding terminal alcohol **S5a** following the hydroboration/oxidation procedure, tr minor: 36.2 min., tr major: 37.8 min., [Chiralpak®IA column, 24 cm × 4.6 mm I.D., hexanes:EtOH = 99.75:0.25, 1.0 mL/min, 210 nm].

**<sup>1</sup>H NMR** (500 MHz,  $\text{CDCl}_3$ )  $\delta$  7.36 – 7.16 (m, 5H), 5.91 – 5.79 (m, 1H), 5.67 (dd,  $J = 15.4, 6.8$  Hz, 1H), 5.49 (dt,  $J = 15.4, 6.4$  Hz, 1H), 5.09 – 4.97 (ovrlp, 2H), 3.47 (qd,  $J = 7.0, 6.8$  Hz, 1H), 2.79 (dd,  $J = 6.4, 6.2$  Hz, 2H), 1.37 (d,  $J = 7.0$  Hz, 3H).

**<sup>13</sup>C NMR** (126 MHz,  $\text{CDCl}_3$ )  $\delta$  146.2, 137.2, 136.3, 128.4, 127.2, 126.6, 126.0, 115.0, 42.3, 36.7, 21.5.

**GCMS** found 172.1 (calculated for  $\text{C}_{13}\text{H}_{16}$ : 172.1)

**IR** (thin film,  $\text{cm}^{-1}$ ): 3026, 2969, 2871, 1493, 1452, 911.

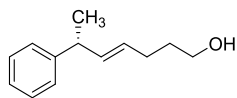

### (*R,E*)-6-Phenylhept-4-en-1-ol (**S5a**)

This product was prepared following the general hydroboration/oxidation procedure in 0.25 mmol scale and the crude mixture was purified by flash column chromatography with hexanes/EtOAc (3/1) to afford the pure product as a colorless oil.

**Yield:** 27 mg, 59%

**e.r.:** 98:2.

$[\alpha]_D^{22} = -7.8$  ( $c = 1.0$ ,  $\text{CHCl}_3$ ).

**<sup>1</sup>H NMR** (500 MHz,  $\text{CDCl}_3$ )  $\delta$  7.34 – 7.16 (m, 5H), 5.65 (dd,  $J = 15.1, 6.9$  Hz, 1H), 5.48 (dt,  $J = 15.1, 6.8$  Hz, 1H), 3.65 (td,  $J = 6.2, 6.2$  Hz, 2H), 3.43 (qd,  $J = 6.9, 6.9$  Hz, 1H), 2.12 (td,  $J = 7.1, 7.1$  Hz, 2H), 1.65 (tt,  $J = 6.9, 6.9$  Hz, 2H), 1.40 (d,  $J = 6.2$ , 1H), 1.35 (d,  $J = 6.9$  Hz, 3H).

**<sup>13</sup>C NMR** (126 MHz,  $\text{CDCl}_3$ )  $\delta$  146.2, 135.7, 128.4, 128.3, 127.1, 126.0, 62.5, 42.2, 32.4, 28.8, 21.5.

**ESIMS** found 213.1 (calculated for  $[\text{C}_{13}\text{H}_{18}\text{ONa}]^+$ : 213.1)

**IR** (thin film,  $\text{cm}^{-1}$ ): 3381, 3027, 2962, 2933, 2870, 1493, 1451, 1060, 973.

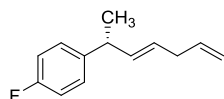

### (*R,E*)-1-Fluoro-4-(hepta-3,6-dien-2-yl)benzene (**5b**)

The substrate was run in 0.4 mmol scale following the general procedure and the crude mixture was purified by flash column chromatography with hexanes to afford the pure product as a colorless oil.

**Yield:** 57 mg, 75%.

e.r.: 97:3.

$[\alpha]_D^{22} = -7.8$  ( $c = 1.0$ ,  $\text{CHCl}_3$ ).

**HPLC Analysis**, this compound was converted to the corresponding terminal alcohol **S5b** following the hydroboration/oxidation procedure, tr major: 13.4 min., tr minor: 15.1 min., [Chiralcel@OD column, 24 cm  $\times$  4.6 mm I.D., hexanes:*i*-PrOH = 98:2, 1.0 mL/min, 250 nm].

**$^1\text{H NMR}$**  (500 MHz,  $\text{CDCl}_3$ )  $\delta$  7.21 – 7.13 (m, 2H), 7.03 – 6.94 (m, 2H), 5.84 (ddt,  $J = 16.7, 10.1, 5.9$  Hz, 1H), 5.62 (dd,  $J = 15.6, 6.6$  Hz, 1H), 5.46 (dt,  $J = 15.6, 6.8$  Hz, 1H), 5.07 – 4.97 (ovrlp, 2H), 3.44 (qd,  $J = 7.0, 6.6$  Hz, 1H), 2.78 (dd,  $J = 6.8, 5.9$  Hz, 2H), 1.34 (d,  $J = 7.0$  Hz, 3H).

**$^{13}\text{C NMR}$**  (126 MHz,  $\text{CDCl}_3$ )  $\delta$  161.2 (d,  $J = 243.9$  Hz), 141.8 (d,  $J = 3.1$  Hz), 137.1, 136.1, 128.5 (d,  $J = 7.8$  Hz), 126.8, 115.0, 115.0 (d,  $J = 21.0$  Hz), 41.5, 36.6, 21.5.

**GCMS** found 190.1 (calculated for  $\text{C}_{13}\text{H}_{15}\text{F}$ : 190.1).

**IR** (thin film,  $\text{cm}^{-1}$ ): 3081, 3005, 2969, 2892, 1638, 1605, 1509, 1223, 1159, 1015, 970, 914.

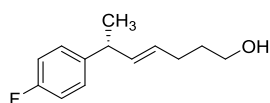

**(*R,E*)-6-(4-Fluorophenyl)hept-4-en-1-ol (S5b)**

This product was prepared following the general hydroboration/oxidation procedure in 0.25 mmol scale and the crude mixture was purified by flash column chromatography with hexanes/EtOAc (3/1) to afford the pure product as a colorless oil.

**Yield:** 32 mg, 62%.

e.r.: 97:3.

$[\alpha]_D^{22} = -7.1$  ( $c = 1.0$ ,  $\text{CHCl}_3$ ).

**$^1\text{H NMR}$**  (500 MHz,  $\text{CDCl}_3$ )  $\delta$  7.19 – 7.11 (m, 2H), 7.01 – 6.93 (m, 2H), 5.60 (dd,  $J = 15.2, 6.9$  Hz, 1H), 5.45 (dt,  $J = 15.2, 6.9$  Hz, 1H), 3.64 (t,  $J = 5.2$  Hz, 2H), 3.41 (qd,  $J = 7.0, 6.9$  Hz, 1H), 2.11 (td,  $J = 7.0, 6.9$  Hz, 2H), 1.68 – 1.61 (m, 2H), 1.31 (d,  $J = 7.0$  Hz, 3H), 1.28 (br, 1H).

**$^{13}\text{C NMR}$**  (126 MHz,  $\text{CDCl}_3$ )  $\delta$  161.2 (d,  $J = 243.5$  Hz), 141.8 (d,  $J = 3.2$  Hz), 135.6, 128.5 (d,  $J = 4.0$  Hz), 128.4, 115.0 (d,  $J = 21.0$  Hz), 62.5, 41.5, 32.3, 28.8, 21.6.

**ESIMS** found 231.1 (calculated for  $[\text{C}_{13}\text{H}_{17}\text{FONa}]^+$ : 231.1).

**IR** (thin film,  $\text{cm}^{-1}$ ): 3379, 2963, 2873, 1604, 1510, 1223, 1159.

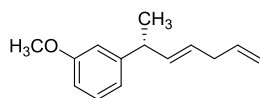

**(*R,E*)-1-(Hepta-3,6-dien-2-yl)-3-methoxybenzene (5c)**

The substrate was run in 0.4 mmol scale following the general procedure and the crude mixture was purified by flash column chromatography with hexanes/EtOAc (150/1) to afford the pure product as a colorless oil.

**Yield:** 72 mg, 89%.

e.r.: 97:3.

$[\alpha]_D^{22} = -4.9$  ( $c = 1.0$ ,  $\text{CHCl}_3$ ).

**HPLC Analysis**, tr major: 24.8 min., tr minor: 26.1 min., [Chiralcel@OD column, 24 cm  $\times$  4.6 mm I.D., hexanes, 0.5 mL/min, 230 nm].

**$^1\text{H NMR}$**  (500 MHz,  $\text{CDCl}_3$ )  $\delta$  7.24 (t,  $J = 7.8$  Hz, 1H), 6.84 (d,  $J = 7.8$  Hz, 1H), 6.80 (s, 1H), 6.76 (d,  $J$

= 7.8 Hz, 1H), 5.86 (ddt,  $J = 16.7, 10.3, 6.4$  Hz, 1H), 5.66 (dd,  $J = 15.5, 6.7$  Hz, 1H), 5.56 – 5.46 (m, 1H), 5.10 – 4.98 (ovrlp, 2H), 3.82 (s, 3H), 3.45 (qd,  $J = 7.1, 6.7$  Hz, 1H), 2.80 (dd,  $J = 6.4, 6.4$  Hz, 2H), 1.37 (d,  $J = 7.1$  Hz, 3H).

$^{13}\text{C}$  NMR (126 MHz,  $\text{CDCl}_3$ )  $\delta$  159.6, 148.0, 137.2, 136.1, 129.3, 126.6, 119.6, 115.0, 113.2, 111.0, 55.1, 42.3, 36.6, 21.4.

GCMS found 202.2 (calculated for  $\text{C}_{14}\text{H}_{18}\text{O}$ : 202.1).

IR (thin film,  $\text{cm}^{-1}$ ): 3081, 3028, 3000, 2965, 2935, 2897, 1601, 1486, 1435, 1262, 1161, 1050.

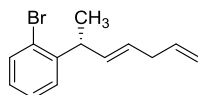

#### (*R,E*)-1-Bromo-2-(hepta-3,6-dien-2-yl)benzene (**5d**)

The substrate was run in 0.4 mmol scale following the general procedure and the crude mixture was purified by flash column chromatography with hexanes to afford the pure product as a colorless oil.

**Yield:** 60 mg, 60%.

**e.r.:** 96:4.

$[\alpha]_{\text{D}}^{22} = +45.5$  ( $c = 1.0$ ,  $\text{CHCl}_3$ ).

**HPLC Analysis**, this compound was converted to the corresponding terminal alcohol **S5d** following the hydroboration/oxidation procedure, tr major: 66.8 min., tr minor: 70.5 min., [Chiralcel@OD column, 24 cm  $\times$  4.6 mm I.D., hexanes:*i*-PrOH = 99:1, 0.5 mL/min, 210 nm].

$^1\text{H}$  NMR (500 MHz,  $\text{CDCl}_3$ )  $\delta$  7.54 (dd,  $J = 8.0, 1.2$  Hz, 1H), 7.31 – 7.21 (ovrlp, 2H), 7.05 (ddd,  $J = 8.0, 6.9, 2.1$  Hz, 1H), 5.85 (ddt,  $J = 16.9, 10.1, 6.4$  Hz, 1H), 5.64 (dd,  $J = 15.5, 5.9$  Hz, 1H), 5.53 (dt,  $J = 15.5, 6.4$  Hz, 1H), 5.05 (dtd,  $J = 16.9, 1.6, 1.6$  Hz, 1H), 5.00 (ddt,  $J = 10.1, 1.6, 1.5$  Hz, 1H), 3.96 (qd,  $J = 7.0, 5.7$  Hz, 1H), 2.80 (dddd,  $J = 6.4, 6.4, 1.6, 1.5$  Hz, 2H), 1.33 (d,  $J = 7.0$  Hz, 3H).

$^{13}\text{C}$  NMR (126 MHz,  $\text{CDCl}_3$ )  $\delta$  145.0, 137.1, 134.5, 132.8, 128.2, 127.6, 127.5, 127.4, 124.3, 115.1, 40.6, 36.7, 20.3.

GCMS found 250.0, 252.0 (calculated for  $\text{C}_{13}\text{H}_{15}\text{Br}$ : 250.0).

IR (thin film,  $\text{cm}^{-1}$ ): 3054, 2971, 2872, 1639, 1470, 1439, 1023, 914.

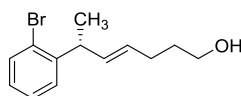

#### (*R,E*)-6-(2-Bromophenyl)hept-4-en-1-ol (**S5d**)

This product was prepared following the general hydroboration/oxidation procedure in 0.2 mmol scale and the crude mixture was purified by flash column chromatography with hexanes/EtOAc (3/1) to afford the pure product as a colorless oil.

**Yield:** 44 mg, 82%.

**e.r.:** 96:4.

$[\alpha]_{\text{D}}^{22} = +45.5$  ( $c = 1.0$ ,  $\text{CHCl}_3$ ).

$^1\text{H}$  NMR (500 MHz,  $\text{CDCl}_3$ )  $\delta$  7.53 (dd,  $J = 8.0, 1.3$  Hz, 1H), 7.30 – 7.19 (ovrlp, 2H), 7.04 (ddd,  $J = 8.0, 7.1, 1.9$  Hz, 1H), 5.63 (ddt,  $J = 15.3, 5.9, 1.3$  Hz, 1H), 5.50 (dtd,  $J = 15.3, 6.7, 1.4$  Hz, 1H), 3.92 (qdd,  $J = 7.0, 5.9, 1.3$  Hz, 1H), 3.65 (t,  $J = 6.5$  Hz, 2H), 2.16 – 2.09 (m, 2H), 1.71 – 1.60 (m, 2H), 1.31 (d,  $J = 7.0$  Hz, 3H).

$^{13}\text{C}$  NMR (126 MHz,  $\text{CDCl}_3$ )  $\delta$  145.0, 134.0, 132.8, 129.2, 128.1, 127.6, 127.5, 124.3, 62.5, 40.6, 32.3,

28.9, 20.3.

**ESIMS** found 291.0, 293.0 (calculated for  $[\text{C}_{13}\text{H}_{17}\text{BrONa}]^+$ : 291.0).

**IR** (thin film,  $\text{cm}^{-1}$ ): 3340, 2935, 2902, 1470, 1023, 755.

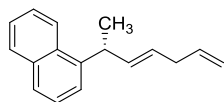

**(*R,E*)-1-(Hepta-3,6-dien-2-yl)naphthalene (5e)**

The substrate was run in 0.4 mmol scale following the general procedure, with the exception that the concentration was 1 M. The crude mixture after the reaction was purified by flash column chromatography with hexanes to afford the pure product as a colorless oil.

**Yield:** 76 mg, 85%.

**e.r.:** 95:5.

$[\alpha]_{\text{D}}^{22} = +48.9$  ( $c = 1.0$ ,  $\text{CHCl}_3$ ).

**HPLC Analysis**, this compound was converted to the corresponding terminal alcohol **S5e** following the hydroboration/oxidation procedure, tr minor: 27.1 min., tr major: 28.4 min., [Chiralpak®IA column, 24  $\text{cm} \times 4.6$  mm I.D., hexanes:*i*-PrOH = 99:1, 1.0 mL/min, 280 nm].

**$^1\text{H NMR}$**  (500 MHz,  $\text{CDCl}_3$ )  $\delta$  8.14 (d,  $J = 8.4$  Hz, 1H), 7.86 (d,  $J = 8.3$  Hz, 1H), 7.72 (d,  $J = 8.1$  Hz, 1H), 7.55 – 7.41 (ovrlp, 3H), 7.39 (d,  $J = 7.1$  Hz, 1H), 5.90 – 5.74 (ovrlp, 2H), 5.54 (dt,  $J = 14.4, 6.5$  Hz, 1H), 5.06 – 4.95 (ovrlp, 2H), 4.29 (qd,  $J = 6.9, 6.8$  Hz, 1H), 2.79 (dd,  $J = 6.5, 6.4$  Hz, 2H), 1.51 (d,  $J = 6.9$  Hz, 3H).

**$^{13}\text{C NMR}$**  (126 MHz,  $\text{CDCl}_3$ )  $\delta$  142.1, 137.2, 136.0, 133.9, 131.4, 128.9, 127.0, 126.7, 125.7, 125.6, 125.3, 123.6, 123.5, 115.0, 37.0, 36.7, 21.0.

**GCMS** found 222.1 (calculated for  $\text{C}_{17}\text{H}_{18}$ : 222.1).

**IR** (thin film,  $\text{cm}^{-1}$ ): 3049, 2970, 2931, 1638, 1597, 1511, 1396, 973, 914.

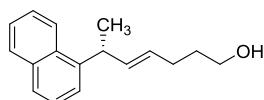

**(*R,E*)-6-(Naphthalen-1-yl)hept-4-en-1-ol (S5e)**

This product was prepared following the general hydroboration/oxidation procedure in 0.25 mmol scale and the crude mixture was purified by flash column chromatography with hexanes/EtOAc (3/1) to afford the pure product as a colorless oil.

**Yield:** 37 mg, 62%.

**e.r.:** 95:5.

$[\alpha]_{\text{D}}^{22} = +32.9$  ( $c = 1.0$ ,  $\text{CHCl}_3$ ).

**$^1\text{H NMR}$**  (500 MHz,  $\text{CDCl}_3$ )  $\delta$  8.13 (d,  $J = 8.4$  Hz, 1H), 7.86 (d,  $J = 7.7$  Hz, 1H), 7.72 (d,  $J = 8.1$  Hz, 1H), 7.54 – 7.41 (ovrlp, 3H), 7.38 (d,  $J = 6.4$  Hz, 1H), 5.79 (dd,  $J = 15.4, 6.5$  Hz, 1H), 5.53 (dt,  $J = 15.4, 6.9$  Hz, 1H), 4.26 (qd,  $J = 6.9, 6.5$  Hz, 1H), 3.63 (td,  $J = 6.4, 5.5$  Hz, 2H), 2.13 (dt,  $J = 6.9, 6.8$  Hz, 2H), 1.64 (tt,  $J = 6.8, 6.4$  Hz, 2H), 1.49 (d,  $J = 6.9$  Hz, 3H), 1.23 (t,  $J = 5.5$  Hz, 1H).

**$^{13}\text{C NMR}$**  (126 MHz,  $\text{CDCl}_3$ )  $\delta$  142.1, 135.4, 133.9, 131.4, 128.8, 128.8, 126.6, 125.6, 125.6, 125.3, 123.6, 123.4, 62.5, 37.0, 32.4, 28.9, 21.0.

**ESIMS** found 263.1 (calculated for  $[\text{C}_{17}\text{H}_{19}\text{ONa}]^+$ : 263.1).

**IR** (thin film,  $\text{cm}^{-1}$ ): 3367, 3048, 2928, 2869, 1597, 1510, 1451, 1396, 1058, 970.



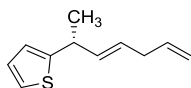

**(R,E)-2-(Hepta-3,6-dien-2-yl)thiophene (5f)**

The substrate was run in 0.4 mmol scale following the general procedure and the crude mixture was purified by flash column chromatography with hexanes to afford the pure product as a colorless oil.

**Yield:** 52 mg, 73%.

**e.r.:** 99:1.

$[\alpha]_D^{22} = -43.7$  ( $c = 1.0$ ,  $\text{CHCl}_3$ ).

**HPLC Analysis**, this compound was converted to the corresponding terminal alcohol **S5f** following the hydroboration/oxidation procedure, tr minor: 59.1 min., tr major: 60.9 min., [Chiralpak®IA column, 24 cm  $\times$  4.6 mm I.D., hexanes:EtOH = 99.75:0.25, 0.8 mL/min, 210 nm].

**$^1\text{H NMR}$**  (500 MHz,  $\text{CDCl}_3$ )  $\delta$  7.15 (d,  $J = 5.1$  Hz, 1H), 6.94 (dd,  $J = 5.1, 3.4$  Hz, 1H), 6.81 (d,  $J = 3.4$  Hz, 1H), 5.85 (ddt,  $J = 17.1, 10.1, 6.3$  Hz, 1H), 5.63 (dd,  $J = 15.3, 7.2$  Hz, 1H), 5.54 (dt,  $J = 15.3, 6.3$  Hz, 1H), 5.09 – 4.98 (ovrlp, 2H), 3.71 (dq,  $J = 7.2, 6.9$  Hz, 1H), 2.79 (dd,  $J = 6.3, 6.3$  Hz, 2H), 1.43 (d,  $J = 6.9$  Hz, 3H).

**$^{13}\text{C NMR}$**  (126 MHz,  $\text{CDCl}_3$ )  $\delta$  150.5, 136.9, 135.7, 127.2, 126.6, 123.1, 122.7, 115.1, 38.0, 36.4, 22.3.

**GCMS** found 178.1 (calculated for  $\text{C}_{11}\text{H}_{14}\text{S}$ : 178.1).

**IR** (thin film,  $\text{cm}^{-1}$ ): 2972, 2922, 1637, 1454, 967, 916.

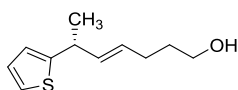

**(R,E)-6-(Thiophen-2-yl)hept-4-en-1-ol (S5f)**

This product was prepared following the general hydroboration/oxidation procedure in 0.2 mmol scale and the crude mixture was purified by flash column chromatography with hexanes/EtOAc (5/1) to afford the pure product as a colorless oil.

**Yield:** 29 mg, 75%.

**e.r.:** 99:1.

$[\alpha]_D^{22} = -29.9$  ( $c = 1.0$ ,  $\text{CHCl}_3$ ).

**$^1\text{H NMR}$**  (500 MHz,  $\text{CDCl}_3$ )  $\delta$  7.14 (d,  $J = 5.1$  Hz, 1H), 6.96 – 6.90 (m, 1H), 6.82 – 6.77 (m, 1H), 5.62 (dd,  $J = 15.3, 7.2$  Hz, 1H), 5.53 (dt,  $J = 15.3, 6.7$  Hz, 1H), 3.72 – 3.63 (ovrlp, 3H), 2.13 (td,  $J = 7.0, 6.7$  Hz, 2H), 1.67 (tt,  $J = 7.0, 7.0$  Hz, 2H), 1.41 (d,  $J = 6.9$  Hz, 3H), 1.29 (d,  $J = 5.4$  Hz, 1H).

**$^{13}\text{C NMR}$**  (126 MHz,  $\text{CDCl}_3$ )  $\delta$  150.6, 135.2, 129.0, 126.6, 123.1, 122.7, 62.4, 38.0, 32.2, 28.6, 22.3.

**ESIMS** found 197.1 (calculated for  $[\text{C}_{11}\text{H}_{17}\text{OS}]^+$ : 197.1).

**IR** (thin film,  $\text{cm}^{-1}$ ): 3409, 2966, 2932, 2870, 1452, 1372, 1234, 1057, 967, 850.

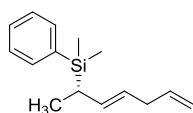

**(S,E)-Hepta-3,6-dien-2-yl dimethyl(phenyl)silane (5g)**

The substrate was run in 0.4 mmol scale following the general procedure with the exception that 5 equivalents of *t*-BuOH was used under neat conditions. The crude mixture was purified by flash column chromatography with hexanes to afford the pure product as a colorless oil.

**Yield:** 81 mg, 88%.

**e.r.:** 97:3.

$[\alpha]_D^{22} = +21.5$  ( $c = 1.0$ ,  $\text{CHCl}_3$ ).

**HPLC Analysis**, this compound was converted to the corresponding terminal alcohol **S5g** following the hydroboration/oxidation procedure, tr major: 24.6 min., tr minor: 26.6 min., [Chiralpak®IA column, 24 cm  $\times$  4.6 mm I.D., hexanes:EtOH = 99.8:0.2, 1.0 mL/min, 210 nm].

**$^1\text{H NMR}$**  (500 MHz,  $\text{CDCl}_3$ )  $\delta$  7.54 – 7.45 (m, 2H), 7.41 – 7.31 (ovrlp, 3H), 5.82 (ddt,  $J = 16.6, 10.2, 6.4$  Hz, 1H), 5.48 (dd,  $J = 15.4, 7.5$  Hz, 1H), 5.28 – 5.16 (m, 1H), 5.04 – 4.93 (ovrlp, 2H), 2.75 (dd,  $J = 6.5, 6.4$  Hz, 2H), 1.80 (dq,  $J = 7.5, 7.2$  Hz, 1H), 1.05 (d,  $J = 7.2$  Hz, 3H), 0.27 (ovrlp, 6H).

**$^{13}\text{C NMR}$**  (126 MHz,  $\text{CDCl}_3$ )  $\delta$  137.9, 134.1, 133.9, 128.9, 127.6, 124.2, 124.1, 114.4, 37.1, 25.7, 13.8, -4.8, -5.3.

**GCMS** found 230.1 (calculated for  $\text{C}_{15}\text{H}_{22}\text{Si}$ : 230.1).

**IR** (thin film,  $\text{cm}^{-1}$ ): 3071, 3019, 2957, 2903, 2869, 1638, 1428, 1248, 1113, 992.

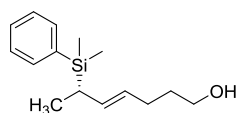

**(*S,E*)-6-(Dimethyl(phenyl)silyl)hept-4-en-1-ol (S5g)**

This product was prepared following the general hydroboration/oxidation procedure in 0.25 mmol scale and the crude mixture was purified by flash column chromatography with hexanes/EtOAc (3/1) to afford the pure product as a colorless oil.

**Yield:** 49 mg, 79%.

**e.r.:** 97:3.

$[\alpha]_D^{22} = +20.2$  ( $c = 1.0$ ,  $\text{CHCl}_3$ ).

**$^1\text{H NMR}$**  (500 MHz,  $\text{CDCl}_3$ )  $\delta$  7.51 – 7.45 (m, 2H), 7.37 – 7.31 (m, 3H), 5.45 (dd,  $J = 15.3, 7.5$  Hz, 1H), 5.25 – 5.15 (m, 1H), 3.61 (td,  $J = 5.8, 5.6$  Hz, 2H), 2.07 (td,  $J = 7.0, 7.0$  Hz, 2H), 1.76 (dq,  $J = 7.5, 7.3$  Hz, 1H), 1.64 – 1.56 (m, 2H), 1.21 (t,  $J = 5.6$  Hz, 1H), 1.03 (d,  $J = 7.3$  Hz, 3H), 0.25 (s, 6H).

**$^{13}\text{C NMR}$**  (126 MHz,  $\text{CDCl}_3$ )  $\delta$  138.0, 134.0, 133.2, 128.9, 127.6, 126.0, 62.6, 32.8, 29.2, 25.5, 13.9, -4.9, -5.3.

**ESIMS** found 249.2 (calculated for  $[\text{C}_{15}\text{H}_{25}\text{OSi}]^+$ : 249.2).

**IR** (thin film,  $\text{cm}^{-1}$ ): 3306, 3070, 2955, 2868, 1428, 1248, 1113, 972.

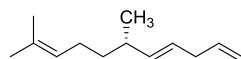

**(*S,E*)-6,10-Dimethylundeca-1,4,9-triene (5h)**

The substrate was run in 0.4 mmol scale following the general procedure and the crude mixture was purified by flash column chromatography with hexanes to afford the pure product as a colorless oil.

**Yield:** 57 mg, 80%.

**e.r.:** 85:15.

$[\alpha]_D^{22} = +17.1$  ( $c = 1.0$ ,  $\text{CHCl}_3$ ).

**HPLC Analysis**, this compound was converted to the corresponding terminal alcohol **S5h** following the hydroboration/oxidation procedure, tr minor: 21.8 min., tr major: 22.8 min., [Chiralpak®IA column, 24 cm  $\times$  4.6 mm I.D., hexanes:*i*-PrOH = 99.6:0.4, 0.8 mL/min, 210 nm].

**$^1\text{H NMR}$**  (500 MHz,  $\text{CDCl}_3$ )  $\delta$  5.83 (ddt,  $J = 16.9, 10.1, 6.3$  Hz, 1H), 5.43 – 5.24 (ovrlp, 2H), 5.10 (dddd,

$J = 7.2, 5.7, 2.9, 1.5$  Hz, 1H), 5.03 (dtd,  $J = 16.9, 1.8, 1.7$  Hz, 1H), 4.98 (ddt,  $J = 10.1, 1.7, 1.5$  Hz, 1H), 2.74 (t,  $J = 6.3$  Hz, 2H), 2.15 – 2.04 (m, 1H), 2.02 – 1.87 (m, 2H), 1.68 (d,  $J = 1.4$  Hz, 3H), 1.59 (s, 3H), 1.29 (dt,  $J = 7.5, 7.5$  Hz, 2H), 0.97 (d,  $J = 6.7$  Hz, 3H).

$^{13}\text{C}$  NMR (126 MHz,  $\text{CDCl}_3$ )  $\delta$  137.6, 131.1, 125.9, 124.8, 124.7, 114.7, 37.2, 36.7, 36.3, 25.8, 25.7, 20.7, 17.7.

GCMS found 178.2 (calculated for  $\text{C}_{13}\text{H}_{22}$ : 178.2).

IR (thin film,  $\text{cm}^{-1}$ ): 2966, 2926, 1639, 1454, 1377, 971, 912.

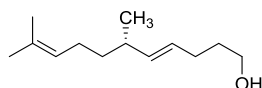

#### (*S,E*)-6,10-Dimethylundeca-4,9-dien-1-ol (S5h)

This product was prepared following the general hydroboration/oxidation procedure in 0.25 mmol scale and the crude mixture was purified by flash column chromatography with hexanes/EtOAc (3/1) to afford the pure product as a colorless oil.

**Yield:** 32 mg, 65%.

**e.r.:** 85:15.

$[\alpha]_D^{22} = +18.1$  ( $c = 1.0$ ,  $\text{CHCl}_3$ ).

$^1\text{H}$  NMR (500 MHz,  $\text{CDCl}_3$ )  $\delta$  5.42 – 5.26 (ovrlp, 2H), 5.08 (t,  $J = 7.1$  Hz, 1H), 3.65 (t,  $J = 6.5$  Hz, 2H), 2.11 – 2.03 (ovrlp, 3H), 1.98 – 1.88 (m, 2H), 1.67 (d,  $J = 1.3$  Hz, 3H), 1.68 – 1.58 (m, 2H), 1.58 (s, 3H), 1.37 (br, 1H), 1.27 (dt,  $J = 7.5, 7.5$  Hz, 2H), 0.95 (d,  $J = 6.7$  Hz, 3H).

$^{13}\text{C}$  NMR (126 MHz,  $\text{CDCl}_3$ )  $\delta$  137.0, 131.2, 127.7, 124.7, 62.6, 37.2, 36.3, 32.5, 28.9, 25.8, 25.7, 20.8, 17.7.

ESIMS found 197.2 (calculated for  $[\text{C}_{13}\text{H}_{25}\text{O}]^+$ : 197.2).

IR (thin film,  $\text{cm}^{-1}$ ): 3349, 2963, 2928, 2869, 1451, 1377, 1058, 969.

### g. General Procedure to Prepare Enantioenriched 1,4-Dienes 7

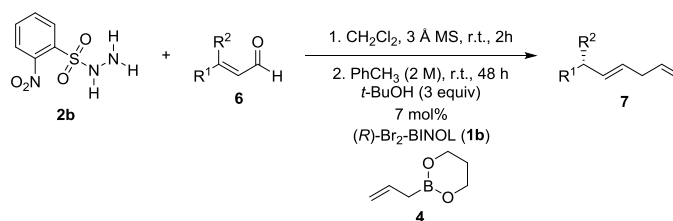

2-Nitrobenzenesulfonylhydrazide (0.4 mmol), a  $\beta,\beta$ -disubstituted enal (0.4 mmol), and oven-dried 3 Å powdered molecular sieves (200 mg) were added to a 10-mL reaction vial equipped with a magnetic stir bar. Dichloromethane (1.0 mL) was added to the vial and the reaction mixture was stirred at room temperature for 2 h, at which time the reaction mixture was concentrated first by rotary evaporation and then by static pressure vacuum (2 – 10 Torr) for 10 min. (*R*)- $\text{Br}_2$ -BINOL (0.04 mmol, 7 mol%), *tert*-butanol (3 equiv, 1.2 mmol) and allylboronate (1.5 equiv, 0.6 mmol) were added and rinsed into the solution with anhydrous toluene (0.2 mL). The reaction was applied to sonication for 5 min to facilitate dissolution. The vial was then sealed with a rubber septum and attached to a balloon filled with argon. The mixture was allowed to stir at room temperature for 48 h, at which time the crude mixture was chromatographed on silica gel to afford the desired product.

## h. Analytical Data for 1,4-Dienes 7

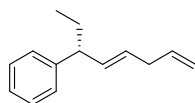

### (*R,E*)-Octa-4,7-dien-3-ylbenzene (**7a**)

The substrate was run in 0.4 mmol scale following the general procedure. The crude mixture after the reaction was purified by flash column chromatography with hexanes to afford the pure product as a colorless oil.

**Yield:** 56 mg, 75%.

**e.r.:** 97:3.

$[\alpha]_D^{22} = -31.0$  ( $c = 1.0$ ,  $\text{CHCl}_3$ ).

**HPLC Analysis**, this compound was converted to the corresponding terminal alcohol **S7a** following the hydroboration/oxidation procedure, tr minor: 69.1 min., tr major: 72.0 min., [Chiralcel@OD column, 24 cm  $\times$  4.6 mm I.D., hexanes:*i*-PrOH = 99:1, 0.4 mL/min, 210 nm].

**$^1\text{H NMR}$**  (500 MHz,  $\text{CDCl}_3$ )  $\delta$  7.33 – 7.26 (m, 2H), 7.23 – 7.15 (ovrlp, 3H), 5.83 (dd,  $J = 16.6, 10.2, 6.4$  Hz, 1H), 5.60 (dd,  $J = 15.3, 7.6$  Hz, 1H), 5.46 (dt,  $J = 15.3, 6.5$  Hz, 1H), 5.06 – 4.95 (ovrlp, 2H), 3.12 (dt,  $J = 7.6, 7.4$  Hz, 1H), 2.77 (dd,  $J = 6.5, 6.4$  Hz, 2H), 1.72 (qt,  $J = 7.4, 7.4$  Hz, 2H), 0.87 (t,  $J = 7.4$  Hz, 3H).

**$^{13}\text{C NMR}$**  (126 MHz,  $\text{CDCl}_3$ )  $\delta$  145.1, 137.2, 135.2, 128.3, 127.5, 127.5, 125.9, 114.9, 50.7, 36.7, 28.9, 12.2.

**GCMS** found 186.1 (calculated for  $\text{C}_{14}\text{H}_{18}$ : 186.1).

**IR** (thin film,  $\text{cm}^{-1}$ ): 3082, 3028, 2961, 2931, 2874, 1639, 1602, 1493, 1452, 970, 913.

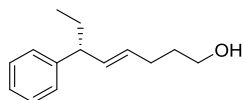

### (*R,E*)-6-Phenyloct-4-en-1-ol (**S7a**)

This product was prepared following the general hydroboration/oxidation procedure in 0.25 mmol scale and the crude mixture was purified by flash column chromatography with hexanes/EtOAc (4/1) to afford the pure product as a colorless oil.

**Yield:** 38 mg, 75%.

**e.r.:** 97:3.

$[\alpha]_D^{22} = -38.6$  ( $c = 1.0$ ,  $\text{CHCl}_3$ ).

**$^1\text{H NMR}$**  (500 MHz,  $\text{CDCl}_3$ )  $\delta$  7.32 – 7.25 (m, 2H), 7.22 – 7.14 (ovrlp, 3H), 5.59 (dd,  $J = 15.3, 7.7$  Hz, 1H), 5.45 (dt,  $J = 15.3, 7.0$  Hz, 1H), 3.63 (t,  $J = 6.5$  Hz, 2H), 3.09 (dt,  $J = 7.7, 7.5$  Hz, 1H), 2.10 (dt,  $J = 7.0, 7.0$  Hz, 2H), 1.74 – 1.66 (m, 2H), 1.67 – 1.59 (m, 2H), 1.26 (br, 1H), 0.85 (t,  $J = 7.4$  Hz, 3H).

**$^{13}\text{C NMR}$**  (126 MHz,  $\text{CDCl}_3$ )  $\delta$  145.2, 134.6, 129.3, 128.3, 127.5, 125.9, 62.5, 50.7, 32.4, 28.9, 28.9, 12.2.

**ESIMS** found 205.2 (calculated for  $[\text{C}_{14}\text{H}_{21}\text{O}]^+$ : 205.2).

**IR** (thin film,  $\text{cm}^{-1}$ ): 3350, 3027, 2929, 2873, 1601, 1493, 1452, 1054, 968.

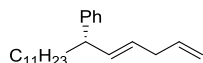

**(*S,E*)-Heptadeca-1,4-dien-6-ylbenzene (7b)**

The substrate was run in 0.4 mmol scale following the general procedure. The crude mixture after the reaction was purified by flash column chromatography with hexanes to afford the pure product as a colorless oil.

**Yield:** 121 mg, 97%.

**e.r.:** 96:4.

**$[\alpha]_D^{22}$**  = +9.8 (*c* = 1.0, CHCl<sub>3</sub>).

**HPLC Analysis**, this compound was converted to the corresponding terminal alcohol **S7b** following the hydroboration/oxidation procedure, *tr* major: 45.5 min., *tr* minor: 48.7 min., [Chiralcel@OD column, 24 cm × 4.6 mm I.D., hexanes:*i*-PrOH = 99.6:0.4, 1.0 mL/min, 210 nm].

**<sup>1</sup>H NMR** (500 MHz, CDCl<sub>3</sub>) δ 7.33 – 7.24 (m, 2H), 7.22 – 7.15 (ovrlp, 3H), 5.89 – 5.77 (m, 1H), 5.60 (dd, *J* = 15.6, 7.7 Hz, 1H), 5.45 (dt, *J* = 15.6, 6.5 Hz, 1H), 5.07 – 4.95 (ovrlp, 2H), 3.22 (dt, *J* = 7.7, 7.4 Hz, 1H), 2.76 (dd, *J* = 6.5, 6.4 Hz, 2H), 1.68 (dt, *J* = 7.4, 7.2 Hz, 2H), 1.35 – 1.15 (ovrlp, 18H), 0.89 (t, *J* = 6.8 Hz, 3H).

**<sup>13</sup>C NMR** (126 MHz, CDCl<sub>3</sub>) δ 145.4, 137.2, 135.5, 128.3, 127.5, 127.3, 125.9, 114.9, 48.9, 36.7, 36.0, 31.9, 29.7, 29.6, 29.6, 29.6, 29.5, 29.3, 27.6, 22.7, 14.1.

**GCMS** found 312.3 (calculated for C<sub>23</sub>H<sub>36</sub>: 312.3).

**IR** (thin film, cm<sup>-1</sup>): 3082, 3028, 2926, 2854, 1729, 1639, 1494, 1453, 967, 912.

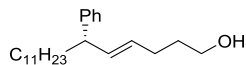

**(*S,E*)-6-Phenylheptadec-4-en-1-ol (S7b)**

This product was prepared following the general hydroboration/oxidation procedure in 0.25 mmol scale and the crude mixture was purified by flash column chromatography with hexanes/EtOAc (4/1) to afford the pure product as a colorless oil.

**Yield:** 61 mg, 74%.

**e.r.:** 96:4.

**$[\alpha]_D^{22}$**  = +14.7 (*c* = 1.0, CHCl<sub>3</sub>).

**<sup>1</sup>H NMR** (500 MHz, CDCl<sub>3</sub>) δ 7.28 (dd, *J* = 8.7, 6.7 Hz, 2H), 7.21 – 7.13 (ovrlp, 3H), 5.59 (dd, *J* = 15.1, 7.7 Hz, 1H), 5.44 (dt, *J* = 15.1, 7.0 Hz, 1H), 3.63 (t, *J* = 6.5 Hz, 2H), 3.18 (dt, *J* = 7.7, 7.6 Hz, 1H), 2.09 (td, *J* = 7.3, 7.0 Hz, 2H), 1.70 – 1.60 (ovrlp, 4H), 1.33 – 1.15 (m, 18H), 0.88 (t, *J* = 6.9 Hz, 3H).

**<sup>13</sup>C NMR** (126 MHz, CDCl<sub>3</sub>) δ 145.4, 134.9, 129.1, 128.3, 127.4, 125.9, 62.5, 48.9, 36.0, 32.4, 31.9, 29.6 (ovrlp, 2 peaks), 29.6, 29.6, 29.5, 29.3, 28.9, 27.6, 22.7, 14.1.

**ESIMS** found 331.3 (calculated for [C<sub>23</sub>H<sub>39</sub>O]<sup>+</sup>: 331.3).

**IR** (thin film, cm<sup>-1</sup>): 3330, 3062, 3027, 2925, 2854, 1493, 1453, 1060, 969, 759.

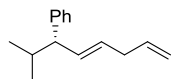

**(*S,E*)-(2-Methylocta-4,7-dien-3-yl)benzene (7c)**

(*Z*)-4-Methyl-3-phenylpent-2-enal (**6c**) was used as the substrate in 0.4 mmol scale following the general procedure. The crude mixture after the reaction was purified by flash column chromatography with hexanes to afford the pure product as a colorless oil.

**Yield:** 66 mg, 82%.

**e.r.:** 98:2.

$[\alpha]_D^{22} = +52.1$  ( $c = 1.0$ ,  $\text{CHCl}_3$ ).

**HPLC Analysis**, this compound was converted to the corresponding terminal alcohol following the hydroboration/oxidation procedure, tr minor: 14.3 min., tr major: 15.9 min., [Chiralpak®AD-H column, 24 cm × 4.6 mm I.D., hexanes:*i*-PrOH = 99:1, 1.0 mL/min, 230 nm].

**<sup>1</sup>H NMR** (500 MHz,  $\text{CDCl}_3$ )  $\delta$  7.33 – 7.25 (m, 2H), 7.22 – 7.13 (ovrlp, 3H), 5.82 (ddt,  $J = 17.1, 10.1, 6.4$  Hz, 1H), 5.65 (dd,  $J = 15.2, 9.0$  Hz, 1H), 5.46 (dt,  $J = 15.2, 6.5$  Hz, 1H), 5.06 – 4.94 (ovrlp, 2H), 2.87 (dd,  $J = 9.0, 8.8$  Hz, 1H), 2.76 (dd,  $J = 6.5, 6.4$  Hz, 2H), 1.92 (dq,  $J = 8.8, 6.7, 6.7$  Hz, 1H), 0.95 (d,  $J = 6.7$  Hz, 3H), 0.75 (d,  $J = 6.7$  Hz, 3H).

**<sup>13</sup>C NMR** (126 MHz,  $\text{CDCl}_3$ )  $\delta$  144.9, 137.2, 134.0, 128.3, 128.3, 127.8, 125.8, 114.9, 57.3, 36.7, 33.0, 21.1, 20.8.

**GCMS** found 200.2 (calculated for  $\text{C}_{15}\text{H}_{20}$ : 200.2).

**IR** (thin film,  $\text{cm}^{-1}$ ): 3084, 3029, 2957, 2867, 1639, 1453, 1385, 970, 913.

The same product afforded by (*E*)-4-methyl-3-phenylpent-2-enal [(*E*)-**8**] using (*S*)-Ph<sub>2</sub>-BINOL as the catalyst:

**Yield:** 48 mg, 60%

**e.r.:** 94:6

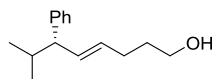

**(*S,E*)-7-Methyl-6-phenyloct-4-en-1-ol (S7c)**

This product was prepared following the general hydroboration/oxidation procedure in 0.25 mmol scale and the crude mixture was purified by flash column chromatography with hexanes/EtOAc (3/1) to afford the pure product as a colorless oil.

**Yield:** 27 mg, 50%.

**e.r.:** 98:2.

$[\alpha]_D^{22} = +39.3$  ( $c = 1.0$ ,  $\text{CHCl}_3$ ).

**<sup>1</sup>H NMR** (500 MHz,  $\text{CDCl}_3$ )  $\delta$  7.32 – 7.24 (m, 2H), 7.21 – 7.11 (ovrlp, 3H), 5.65 (dd,  $J = 15.2, 9.1$  Hz, 1H), 5.45 (dt,  $J = 15.2, 6.9$  Hz, 1H), 3.62 (t,  $J = 6.5$  Hz, 2H), 2.84 (dd,  $J = 9.1, 8.8$  Hz, 1H), 2.10 (td,  $J = 7.1, 6.9$  Hz, 2H), 1.90 (dq,  $J = 8.8, 6.6, 6.6$  Hz, 1H), 1.68 – 1.58 (m, 2H), 1.30 (br, 1H), 0.94 (d,  $J = 6.6$  Hz, 3H), 0.74 (d,  $J = 6.6$  Hz, 3H).

**<sup>13</sup>C NMR** (126 MHz,  $\text{CDCl}_3$ )  $\delta$  145.0, 133.4, 130.2, 128.3, 127.8, 125.8, 62.5, 57.3, 33.0, 32.3, 28.9, 21.1, 20.8.

**ESIMS** found 219.2 (calculated for  $[\text{C}_{15}\text{H}_{23}\text{O}]^+$ : 219.2)

**IR** (thin film,  $\text{cm}^{-1}$ ): 3380, 3027, 2931, 2871, 1451, 701.

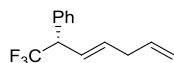

**(*S,E*)-(1,1,1-Trifluorohepta-3,6-dien-2-yl)benzene (7d)**

The substrate was run in 0.4 mmol scale following the general procedure, with the exception that 5 equivalents of *t*-BuOH was used in the absence of toluene. The crude mixture after the reaction was purified by flash column chromatography with hexanes to afford the pure product as a colorless oil.

**Yield:** 75 mg, 83%.

**e.r.:** 97:3.

$[\alpha]_D^{22} = +54.2$  ( $c = 1.0$ ,  $\text{CHCl}_3$ ).

**HPLC Analysis**, this compound was converted to the corresponding terminal alcohol **S7d** following the hydroboration/oxidation procedure, tr major: 21.0 min., tr minor: 25.8 min., [Chiralcel®OD column, 24 cm  $\times$  4.6 mm I.D., hexanes:*i*-PrOH = 98:2, 1.0 mL/min, 230 nm].

**$^1\text{H}$  NMR** (500 MHz,  $\text{CDCl}_3$ )  $\delta$  7.41 – 7.30 (ovrlp, 5H), 5.88 – 5.66 (ovrlp, 3H), 5.08 – 5.01 (ovrlp, 2H), 3.98 (qd,  $J = 9.4, 7.4$  Hz, 1H), 2.84 (dd,  $J = 6.5, 6.5$  Hz, 2H).

**$^{13}\text{C}$  NMR** (126 MHz,  $\text{CDCl}_3$ )  $\delta$  135.7, 135.0 (q,  $J = 1.6$  Hz), 134.6, 128.9, 128.7, 128.0, 126.0 (q,  $J = 280.2$  Hz), 124.4 (q,  $J = 2.6$  Hz), 116.0, 53.2 (q,  $J = 27.6$  Hz), 36.4.

**GCMS** found 226.1 (calculated for  $\text{C}_{13}\text{H}_{13}\text{F}_3$ : 226.1).

**IR** (thin film,  $\text{cm}^{-1}$ ): 3069, 3038, 2983, 2902, 1640, 1456, 1255, 1165, 1110, 971, 919.

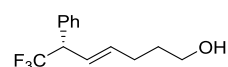

**(*S,E*)-7,7,7-Trifluoro-6-phenylhept-4-en-1-ol (S7d)**

This product was prepared following the general hydroboration/oxidation procedure in 0.25 mmol scale and the crude mixture was purified by flash column chromatography with hexanes/EtOAc (4/1) to afford the pure product as a colorless oil.

**Yield:** 46 mg, 75%.

**e.r.:** 97:3.

$[\alpha]_D^{22} = +43.9$  ( $c = 1.0$ ,  $\text{CHCl}_3$ ).

**$^1\text{H}$  NMR** (500 MHz,  $\text{CDCl}_3$ )  $\delta$  7.40 – 7.28 (ovrlp, 5H), 5.83 – 5.67 (ovrlp, 2H), 3.94 (qd,  $J = 9.4, 7.6$  Hz, 1H), 3.64 (t,  $J = 6.5$  Hz, 2H), 2.18 (td,  $J = 7.7, 6.3$  Hz, 2H), 1.71 – 1.61 (m, 2H), 1.28 (br, 1H).

**$^{13}\text{C}$  NMR** (126 MHz,  $\text{CDCl}_3$ )  $\delta$  136.4, 135.1, 128.8, 128.7, 128.0, 126.0 (q,  $J = 279.8$  Hz), 123.8 (q,  $J = 2.3$  Hz), 62.2, 53.2 (q,  $J = 27.6$  Hz), 31.7, 28.8.

**ESIMS** found 245.1 (calculated for  $[\text{C}_{13}\text{H}_{16}\text{F}_3\text{O}]^+$ : 245.1).

**IR** (thin film,  $\text{cm}^{-1}$ ): 3358, 3035, 2936, 1498, 1255, 1163, 1111, 1059.

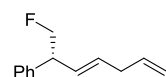

**(*R,E*)-(1-Fluorohepta-3,6-dien-2-yl)benzene (7e)**

The substrate was run in 0.4 mmol scale following the general procedure, with the exception that 5 equivalents of *t*-BuOH was used in the absence of toluene. The crude mixture after the reaction was purified by flash column chromatography with hexanes to afford the pure product as a colorless oil.

**Yield:** 59 mg, 77%.

**e.r.:** 93:7.

$[\alpha]_D^{22} = -28.2$  ( $c = 1.0$ ,  $\text{CHCl}_3$ ).

**HPLC Analysis**, this compound was converted to the corresponding terminal alcohol **S7e** following the hydroboration/oxidation procedure, tr minor: 39.7 min., tr major: 42.4 min., [Chiralpak®IA column, 24 cm  $\times$  4.6 mm I.D., hexanes:EtOH = 99:1, 1.0 mL/min, 230 nm].

**$^1\text{H}$  NMR** (500 MHz,  $\text{CDCl}_3$ )  $\delta$  7.37 – 7.30 (m, 2H), 7.29 – 7.21 (ovrlp, 3H), 5.83 (ddt,  $J = 16.6, 10.2, 6.4$  Hz, 1H), 5.72 – 5.56 (ovrlp, 2H), 5.08 – 4.98 (ovrlp, 2H), 4.59 (dd,  $J = 47.4, 6.8$  Hz, 2H), 3.71 (ddt,  $J = 16.9, 6.8, 6.8$  Hz, 1H), 2.81 (dd,  $J = 6.4, 5.7$  Hz, 2H).

$^{13}\text{C}$  NMR (126 MHz,  $\text{CDCl}_3$ )  $\delta$  140.1 (d,  $J = 5.4$  Hz), 136.5, 130.8, 129.6 (d,  $J = 5.4$  Hz), 128.6, 128.0, 126.9, 115.4, 85.9 (d,  $J = 174.8$  Hz), 49.1 (d,  $J = 19.4$  Hz), 36.7.

GCMS found 190.1 (calculated for  $\text{C}_{13}\text{H}_{15}\text{F}$ : 190.1).

IR (thin film,  $\text{cm}^{-1}$ ): 3081, 3030, 2967, 2898, 1639, 1495, 1454, 1002.

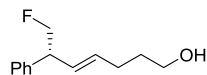

**(*R,E*)-7-Fluoro-6-phenylhept-4-en-1-ol (S7e)**

This product was prepared following the general hydroboration/oxidation procedure in 0.25 mmol scale and the crude mixture was purified by flash column chromatography with hexanes/EtOAc (3/1) to afford the pure product as a colorless oil.

**Yield:** 29 mg, 55%.

**e.r.:** 93:7.

$[\alpha]_{\text{D}}^{22} = -28.6$  ( $c = 1.0$ ,  $\text{CHCl}_3$ ).

$^1\text{H}$  NMR (500 MHz,  $\text{CDCl}_3$ )  $\delta$  7.33 (dd,  $J = 7.5, 7.5$  Hz, 2H), 7.28 – 7.19 (ovrlp, 3H), 5.72 – 5.56 (ovrlp, 2H), 4.57 (dd,  $J = 47.3, 6.9$  Hz, 2H), 3.74 – 3.60 (ovrlp, 3H), 2.16 (dt,  $J = 7.0, 7.0$  Hz, 2H), 1.67 (tt,  $J = 7.0, 6.9$  Hz, 2H), 1.25 (t,  $J = 5.4$  Hz, 1H).

$^{13}\text{C}$  NMR (126 MHz,  $\text{CDCl}_3$ )  $\delta$  140.1 (d,  $J = 5.5$  Hz), 132.6, 129.0 (d,  $J = 5.2$  Hz), 128.6, 127.9, 126.9, 85.9 (d,  $J = 174.7$  Hz), 62.4, 49.1 (d,  $J = 19.5$  Hz), 32.1, 29.0.

ESIMS found 209.1 (calculated for  $[\text{C}_{13}\text{H}_{18}\text{FO}]^+$ : 209.1).

IR (thin film,  $\text{cm}^{-1}$ ): 3361, 3030, 2936, 1495, 1453, 1007.

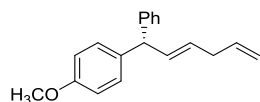

**(*S,E*)-1-Methoxy-4-(1-phenylhexa-2,5-dien-1-yl)benzene (7f)**

The substrate was run in 0.4 mmol scale following the general procedure. The crude mixture after the reaction was purified by flash column chromatography with hexanes/EtOAc (100:1) to afford the pure product as a colorless oil.

**Yield:** 91 mg, 86%.

**e.r.:** 98:2.

$[\alpha]_{\text{D}}^{22} = -4.9$  ( $c = 1.0$ ,  $\text{CHCl}_3$ ).

**HPLC Analysis**,  $t_{\text{r}}$  major: 16.0 min.,  $t_{\text{r}}$  minor: 18.1 min., [Chiralcel@OD column, 24 cm  $\times$  4.6 mm I.D., hexanes, 1.0 mL/min, 230 nm].

$^1\text{H}$  NMR (500 MHz,  $\text{CDCl}_3$ )  $\delta$  7.31 (t,  $J = 7.6$  Hz, 2H), 7.25 – 7.18 (ovrlp, 3H), 7.16 – 7.08 (m, 2H), 6.90 – 6.83 (m, 2H), 5.95 (dd,  $J = 15.2, 7.5$  Hz, 1H), 5.87 (ddt,  $J = 16.7, 10.1, 6.4$  Hz, 1H), 5.46 (dt,  $J = 15.2, 6.5$  Hz, 1H), 5.10 – 4.99 (ovrlp, 2H), 4.69 (d,  $J = 7.5$  Hz, 1H), 3.80 (s, 3H), 2.86 (dd,  $J = 6.5, 6.4$  Hz, 2H).

$^{13}\text{C}$  NMR (126 MHz,  $\text{CDCl}_3$ )  $\delta$  158.0, 144.3, 136.9, 136.2, 134.0, 129.5, 129.5, 128.5, 128.3, 126.2, 115.2, 113.7, 55.2, 53.1, 36.6.

GCMS found 264.2 (calculated for  $\text{C}_{19}\text{H}_{20}\text{O}$ : 264.2).

IR (thin film,  $\text{cm}^{-1}$ ): 3062, 3027, 2906, 2835, 1610, 1510, 1250, 1178, 1037.



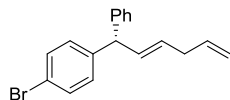

**(*S,E*)-1-Bromo-4-(1-phenylhexa-2,5-dien-1-yl)benzene (7g)**

The substrate was run in 0.4 mmol scale following the general procedure. The crude mixture after the reaction was purified by flash column chromatography with hexanes to afford the pure product as a colorless oil.

**Yield:** 109 mg, 87%.

**e.r.:** 98:2.

**[ $\alpha$ ]<sub>D</sub><sup>22</sup>** = -11.0 (c = 1.0, CHCl<sub>3</sub>).

**HPLC Analysis**, tr major: 15.7 min., tr minor: 16.9 min., [Chiralcel@OD column, 24 cm × 4.6 mm I.D., hexanes, 0.5 mL/min, 230 nm].

**<sup>1</sup>H NMR** (500 MHz, CDCl<sub>3</sub>)  $\delta$  7.44 – 7.38 (m, 2H), 7.34 – 7.26 (m, 2H), 7.25 – 7.18 (m, 1H), 7.19 – 7.13 (m, 2H), 7.09 – 7.02 (m, 2H), 5.95 – 5.78 (ovrlp, 2H), 5.44 (dt, *J* = 15.3, 6.5 Hz, 1H), 5.08 – 4.98 (ovrlp, 2H), 4.67 (d, *J* = 7.4 Hz, 1H), 2.86 – 2.80 (ovrlp, 2H).

**<sup>13</sup>C NMR** (126 MHz, CDCl<sub>3</sub>)  $\delta$  143.4, 143.0, 136.6, 133.1, 131.4, 130.3, 130.3, 128.5, 128.4, 126.4, 120.1, 115.4, 53.3, 36.6.

**GCMS** found 312.1, 314.1 (calculated for C<sub>18</sub>H<sub>17</sub>Br: 312.1).

**IR** (thin film, cm<sup>-1</sup>): 3062, 3027, 2895, 1638, 1486, 1074, 918.

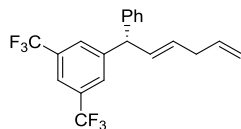

**(*S,E*)-1-(1-Phenylhexa-2,5-dien-1-yl)-3,5-bis(trifluoromethyl)benzene (7h)**

The substrate was run in 0.4 mmol scale following the general procedure. The crude mixture after the reaction was purified by flash column chromatography with hexanes to afford the pure product as a colorless oil.

**Yield:** 129 mg, 87%.

**e.r.:** 98:2.

**[ $\alpha$ ]<sub>D</sub><sup>22</sup>** = +3.3 (c = 1.0, CHCl<sub>3</sub>).

**HPLC Analysis**, tr minor: 28.0 min., tr major: 29.3 min., [Chiralcel@OD column, 24 cm × 4.6 mm I.D., hexanes, 0.2 mL/min, 210 nm].

**<sup>1</sup>H NMR** (500 MHz, CDCl<sub>3</sub>)  $\delta$  7.77 (s, 1H), 7.67 (s, 2H), 7.41 – 7.33 (m, 2H), 7.33 – 7.25 (m, 1H), 7.24 – 7.15 (m, 2H), 5.95 (dd, *J* = 15.3, 7.5 Hz, 1H), 5.87 (ddt, *J* = 16.8, 10.2, 6.4 Hz, 1H), 5.54 (dt, *J* = 15.3, 6.5 Hz, 1H), 5.13 – 5.03 (m, 2H), 4.86 (d, *J* = 7.5 Hz, 1H), 2.89 (dd, *J* = 6.5, 6.4 Hz, 2H).

**<sup>13</sup>C NMR** (126 MHz, CDCl<sub>3</sub>)  $\delta$  146.7, 142.0, 136.2, 132.0, 131.7, 131.6 (q, *J* = 28.4 Hz), 128.8, 128.7, 128.4, 127.0, 123.4 ((q, *J* = 272.7 Hz)), 120.6, 115.7, 53.6, 53.6, 36.5.

**<sup>19</sup>F NMR** (470 MHz, CDCl<sub>3</sub>)  $\delta$  -62.8.

**GCMS** found 370.1 (calculated for C<sub>20</sub>H<sub>16</sub>F<sub>6</sub>: 370.1).

**IR** (thin film, cm<sup>-1</sup>): 3086, 3030, 2898, 1495, 1374, 1278, 1171, 1134, 976.

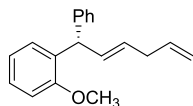

**(*S,E*)-1-Methoxy-2-(1-phenylhexa-2,5-dien-1-yl)benzene (7i)**

The substrate was run in 0.4 mmol scale following the general procedure. The crude mixture after the reaction was purified by flash column chromatography with hexanes to afford the pure product as a colorless oil.

**Yield:** 97 mg, 99%.

**e.r.:** 98:2.

**[ $\alpha$ ]<sub>D</sub><sup>22</sup>** = +9.9 (c = 1.0, CHCl<sub>3</sub>).

**HPLC Analysis**, tr major: 25.8 min., tr minor: 28.2 min., [Chiralcel@OD column, 24 cm × 4.6 mm I.D., hexanes, 0.5 mL/min, 210 nm].

**<sup>1</sup>H NMR** (500 MHz, CDCl<sub>3</sub>)  $\delta$  7.31 – 7.24 (m, 2H), 7.26 – 7.14 (ovrlp, 5H), 6.94 (dd, *J* = 7.5, 7.5 Hz, 1H), 6.88 (d, *J* = 8.3 Hz, 1H), 5.96 (dd, *J* = 15.2, 7.2 Hz, 1H), 5.86 (ddt, *J* = 16.6, 10.1, 6.1 Hz, 1H), 5.40 (dt, *J* = 15.2, 6.5 Hz, 1H), 5.15 (d, *J* = 7.2 Hz, 1H), 5.08 – 4.97 (ovrlp, 2H), 3.76 (s, 3H), 2.84 (dd, *J* = 6.5, 6.1 Hz, 2H).

**<sup>13</sup>C NMR** (126 MHz, CDCl<sub>3</sub>)  $\delta$  156.9, 144.0, 137.1, 133.4, 132.5, 129.4, 129.2, 128.5, 128.0, 127.4, 125.8, 120.5, 115.1, 110.8, 55.5, 46.6, 36.6.

**GCMS** found 246.2 (calculated for C<sub>19</sub>H<sub>20</sub>O: 246.2).

**IR** (thin film, cm<sup>-1</sup>): 3061, 3027, 3002, 2936, 2835, 1638, 1491, 1463, 1244, 1107, 1031, 976.

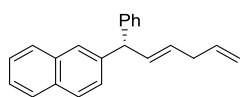

**(*S,E*)-2-(1-Phenylhexa-2,5-dien-1-yl)naphthalene (7j)**

The substrate was run in 0.4 mmol scale following the general procedure. The crude mixture after the reaction was purified by flash column chromatography with hexanes to afford the pure product as a colorless oil.

**Yield:** 99 mg, 87%.

**e.r.:** 95:5.

**[ $\alpha$ ]<sub>D</sub><sup>22</sup>** = +2.3 (c = 1.0, CHCl<sub>3</sub>).

**HPLC Analysis**, tr major: 16.7 min., tr minor: 29.5 min., [Chiralcel@OD column, 24 cm × 4.6 mm I.D., hexanes, 1.0 mL/min, 254 nm].

**<sup>1</sup>H NMR** (500 MHz, CDCl<sub>3</sub>)  $\delta$  7.87 – 7.76 (ovrlp, 3H), 7.68 (s, 1H), 7.50 – 7.44 (m, 2H), 7.37 – 7.29 (m, 3H), 7.30 – 7.21 (m, 3H), 6.08 (dd, *J* = 15.3, 7.5 Hz, 1H), 5.90 (ddt, *J* = 16.7, 10.3, 6.3 Hz, 1H), 5.59 – 5.49 (m, 1H), 5.13 – 5.00 (m, 2H), 4.92 (d, *J* = 7.4 Hz, 1H), 2.90 (t, *J* = 6.2 Hz, 2H).

**<sup>13</sup>C NMR** (126 MHz, CDCl<sub>3</sub>)  $\delta$  143.8, 141.5, 136.8, 133.5, 132.2, 130.1, 128.7, 128.4, 128.0, 127.8, 127.6, 127.3, 126.7, 126.3, 126.0, 125.5, 115.3, 54.1, 36.7.

**GCMS** found 284.2 (calculated for C<sub>22</sub>H<sub>20</sub>: 284.2).

**IR** (thin film, cm<sup>-1</sup>): 3058, 3026, 2978, 2893, 1637, 1600, 1507, 1493, 975.

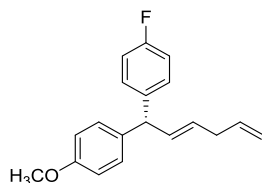

**(*R,E*)-1-Fluoro-4-(1-(4-methoxyphenyl)hexa-2,5-dien-1-yl)benzene (7k)**

The substrate was run in 0.4 mmol scale following the general procedure. The crude mixture after the reaction was purified by flash column chromatography with hexanes to afford the pure product as a colorless oil.

**Yield:** 96 mg, 85%.

**e.r.:** 98:2.

**[ $\alpha$ ]<sub>D</sub><sup>22</sup>** = -4.2 (*c* = 1.0, CHCl<sub>3</sub>).

**HPLC Analysis**, *tr* major: 16.1 min., *tr* minor: 18.4 min., [Chiralcel@OD column, 24 cm × 4.6 mm I.D., hexanes, 1.0 mL/min, 210 nm].

**<sup>1</sup>H NMR** (500 MHz, CDCl<sub>3</sub>)  $\delta$  7.18 – 7.10 (m, 2H), 7.12 – 7.06 (m, 2H), 7.02 – 6.94 (m, 2H), 6.89 – 6.83 (m, 2H), 5.95 – 5.80 (ovrlp, 2H), 5.43 (dt, *J* = 15.1, 6.5 Hz, 1H), 5.09 – 4.97 (ovrlp, 2H), 4.66 (d, *J* = 7.3 Hz, 1H), 3.80 (s, 3H), 2.84 (dd, *J* = 6.5, 6.4 Hz, 2H).

**<sup>13</sup>C NMR** (126 MHz, CDCl<sub>3</sub>)  $\delta$  161.4 (d, *J* = 244.3 Hz), 158.1, 140.0 (d, *J* = 3.2 Hz), 136.8, 135.9, 133.8, 129.8 (d, *J* = 7.8 Hz), 129.7, 129.4, 115.3, 115.1 (d, *J* = 21.1 Hz), 113.8, 55.2, 52.3, 36.6.

**GCMS** found 282.1 (calculated for C<sub>19</sub>H<sub>19</sub>FO: 282.1).

**IR** (thin film, cm<sup>-1</sup>): 3031, 3004, 2956, 2901, 2836, 1638, 1608, 1508, 1250, 1179, 1158, 1037.

**i. General Procedure to Prepare Racemic 1,4-Dienes ( $\pm$ )-11 and ( $\pm$ )-12**

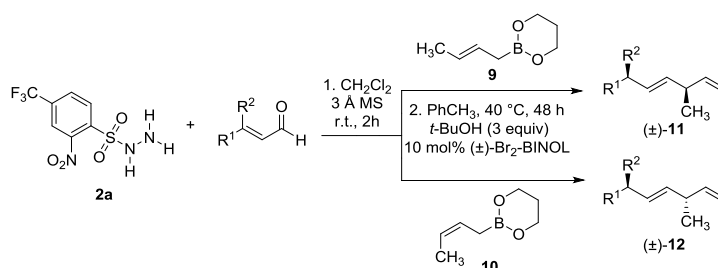

2-Nitro-4-(trifluoromethyl)benzenesulfonylhydrazide (0.4 mmol), a  $\beta,\beta$ -disubstituted enal (0.4 mmol), and oven-dried 3 Å powdered molecular sieves (200 mg) were added to a 10-mL reaction vial equipped with a magnetic stir bar. Dichloromethane (1.0 mL) was added to the vial and the reaction mixture was stirred at room temperature for 2 h, at which time the reaction mixture was concentrated first by rotary evaporation and then by static pressure vacuum (2 – 10 Torr) for 10 min. Racemic Br<sub>2</sub>-BINOL catalyst (0.06 mmol, 10 mol%), *tert*-butanol (1.2 mmol) and (*E*)- or (*Z*)-crotylboronate (0.6 mmol) were added and rinsed into the solution with dry toluene (0.2 mL). The reaction was applied to sonication for 10 min to facilitate dissolution. The vial was sealed with a rubber septum and attached to a balloon filled with argon. The mixture was allowed to stir at 40 °C for 48 h, after which time the reaction was cooled to room temperature and the crude mixture was chromatographed on silica gel to afford the desired product.

## j. General Procedure to Prepare Enantioenriched 1,4-Dienes 11 and 12

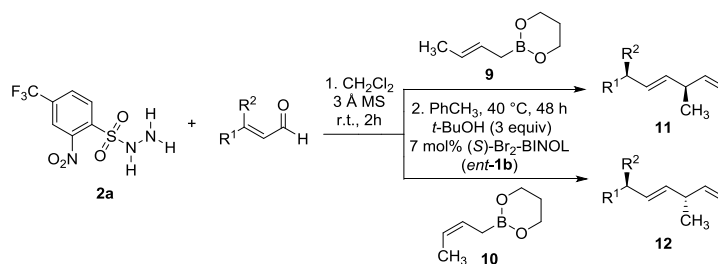

2-Nitro-4-(trifluoromethyl)benzenesulfonylhydrazide (0.4 mmol), a  $\beta,\beta$ -disubstituted enal (0.4 mmol), and oven-dried 3 Å powdered molecular sieves (200 mg) were added to a 10-mL reaction vial equipped with a magnetic stir bar. Dichloromethane (1.0 mL) was added to the vial and the reaction mixture was stirred at room temperature for 2 h, at which time the reaction mixture was concentrated first by rotary evaporation and then by static pressure vacuum (2 – 10 Torr) for 10 min. (*S*)-Br<sub>2</sub>-BINOL catalyst (0.04 mmol, 7 mol%), *tert*-butanol (1.2 mmol) and (*E*)- or (*Z*)-crotylboronate (0.6 mmol) were added and rinsed into the solution with dry toluene (0.2 mL). The reaction was applied to sonication for 10 min to facilitate dissolution. The vial was sealed with a rubber septum and attached to a balloon filled with argon. The mixture was allowed to stir at 40 °C for 48 h, after which time the reaction was cooled to room temperature and the crude mixture was chromatographed on silica gel to afford the desired product.

## k. Analytical Data for 1,4-Dienes 11 and 12

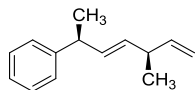

### ((2*S*,5*R*,*E*)-5-Methylhepta-3,6-dien-2-yl)benzene (11a)

The substrate was run in 0.4 mmol scale following the general procedure. The crude mixture after the reaction was purified by flash column chromatography with hexanes to afford the pure product as a colorless oil.

**Yield:** 44 mg, 59%

**e.r.:** 98:2

**d.r.:** 16:1

$[\alpha]_D^{22} = -5.2$  ( $c = 1.0$ , CHCl<sub>3</sub>).

**HPLC Analysis**, this compound was converted to the corresponding terminal alcohol **S11a** following the hydroboration/oxidation procedure, *tr* minor: 24.6 min., *tr* major: 29.8 min., [Chiralpak®AD-H column, 24 cm × 4.6 mm I.D., hexanes:EtOH = 99.5:0.5, 0.8 mL/min, 210 nm].

**<sup>1</sup>H NMR** (500 MHz, CDCl<sub>3</sub>)  $\delta$  7.33 – 7.26 (m, 2H), 7.24 – 7.15 (ovrlp, 3H), 5.79 (ddd,  $J = 17.1, 10.3, 6.5$  Hz, 1H), 5.61 (dd,  $J = 15.5, 6.7$  Hz, 1H), 5.43 (dd,  $J = 15.5, 6.9$  Hz, 1H), 4.98 (d,  $J = 17.1$  Hz, 1H), 4.94 (d,  $J = 10.3$  Hz, 1H), 3.44 (qd,  $J = 7.0, 6.9$  Hz, 1H), 2.92 – 2.79 (m, 1H), 1.34 (d,  $J = 7.0$  Hz, 3H), 1.10 (d,  $J = 6.9$  Hz, 3H).

**<sup>13</sup>C NMR** (126 MHz, CDCl<sub>3</sub>)  $\delta$  146.3, 143.1, 133.9, 132.8, 128.3, 127.2, 125.9, 112.6, 42.1, 40.1, 21.5, 19.9.

**GCMS** found 186.1 (calculated for C<sub>14</sub>H<sub>18</sub>: 186.1).

**IR** (thin film, cm<sup>-1</sup>): 2962, 2927, 1262, 1100, 807.

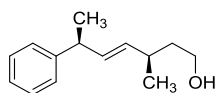

**(3R,6S,E)-3-Methyl-6-phenylhept-4-en-1-ol (S11a)**

This product was prepared following the general hydroboration/oxidation procedure in 0.2 mmol scale and the crude mixture was purified by flash column chromatography with hexanes:EtOAc (3:1) to afford the pure product as a colorless oil.

**Yield:** 25 mg, 60%.

**e.r.:** 98:2.

**d.r.:** 16:1.

$[\alpha]_D^{22} = -17.5$  ( $c = 1.0$ ,  $\text{CHCl}_3$ ).

**$^1\text{H NMR}$**  (500 MHz,  $\text{CDCl}_3$ )  $\delta$  7.32 – 7.27 (m, 2H), 7.23 – 7.15 (ovrlp, 3H), 5.61 (dd,  $J = 15.4, 6.8$  Hz, 1H), 5.35 (dd,  $J = 15.4, 8.1$  Hz, 1H), 3.62 (t,  $J = 6.7$  Hz, 2H), 3.47 – 3.37 (m, 1H), 2.33 – 2.22 (m, 1H), 1.62 – 1.50 (m, 2H), 1.34 (d,  $J = 7.0$  Hz, 3H), 1.02 (d,  $J = 6.8$  Hz, 3H).

**$^{13}\text{C NMR}$**  (126 MHz,  $\text{CDCl}_3$ )  $\delta$  146.3, 134.5, 134.0, 128.4, 127.1, 126.0, 61.4, 42.1, 39.8, 33.9, 21.5, 21.1. (Diastereomer peaks are visible and cannot be separated)

**ESIMS** found 205.2 (calculated for  $[\text{C}_{14}\text{H}_{21}\text{O}]^+$ : 205.2)

**IR** (thin film,  $\text{cm}^{-1}$ ): 3333, 3027, 2962, 2928, 2872, 1493, 1452, 1053, 973.

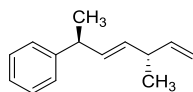

**((2S,5S,E)-5-Methylhepta-3,6-dien-2-yl)benzene (12a)**

The substrate was run in 0.4 mmol scale following the general procedure using (*Z*)-crotylboronate. The crude mixture after the reaction was purified by flash column chromatography with hexanes to afford the pure product as a colorless oil.

**Yield:** 40 mg, 54%.

**e.r.:** >99:1.

**d.r.:** 9:1.

$[\alpha]_D^{22} = +7.5$  ( $c = 1.0$ ,  $\text{CHCl}_3$ ).

**HPLC Analysis**, this compound was converted to the corresponding terminal alcohol **S12a** following the hydroboration/oxidation procedure,  $t_r$  major: 26.9 min.,  $t_r$  minor: 32.6 min., [Chiralpak®AD-H column, 24 cm  $\times$  4.6 mm I.D., hexanes:EtOH = 99.5:0.5, 0.8 mL/min, 210 nm].

**$^1\text{H NMR}$**  (500 MHz,  $\text{CDCl}_3$ )  $\delta$  7.31 (dd,  $J = 7.6, 7.6$  Hz, 2H), 7.25 – 7.16 (ovrlp, 3H), 5.81 (ddd,  $J = 17.2, 10.4, 6.5$  Hz, 1H), 5.62 (dd,  $J = 15.5, 6.7$  Hz, 1H), 5.43 (dd,  $J = 15.5, 6.7$  Hz, 1H), 5.00 (d,  $J = 17.2$  Hz, 1H), 4.96 (d,  $J = 10.4$  Hz, 1H), 3.45 (qd,  $J = 6.9, 6.7$  Hz, 1H), 2.92 – 2.78 (m, 1H), 1.36 (d,  $J = 6.9$  Hz, 3H), 1.10 (d,  $J = 6.9$  Hz, 3H).

**$^{13}\text{C NMR}$**  (126 MHz,  $\text{CDCl}_3$ )  $\delta$  146.3, 143.1, 133.9, 132.8, 128.3, 127.2, 125.9, 112.7, 42.2, 40.2, 21.5, 19.9.

**GCMS** found 186.1 (calculated for  $\text{C}_{14}\text{H}_{18}$ : 186.1).

**IR** (thin film,  $\text{cm}^{-1}$ ): 2963, 2929, 2872, 1452, 1262, 1097, 1021, 804.

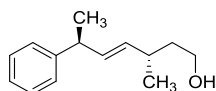

**(3S,6S,E)-3-Methyl-6-phenylhept-4-en-1-ol (S12a)**

This product was prepared following the general hydroboration/oxidation procedure in 0.2 mmol scale and the crude mixture was purified by flash column chromatography with hexanes:EtOAc (3:1) to afford the pure product as a colorless oil.

**Yield:** 27 mg, 65%.

**e.r.:** >99:1.

**d.r.:** 9:1.

$[\alpha]_D^{22} = +35.7$  ( $c = 0.5$ ,  $\text{CHCl}_3$ ).

**$^1\text{H NMR}$**  (500 MHz,  $\text{CDCl}_3$ )  $\delta$  7.32 – 7.27 (m, 2H), 7.22 – 7.16 (ovrlp, 3H), 5.61 (dd,  $J = 15.4, 6.8$  Hz, 1H), 5.34 (dd,  $J = 15.4, 8.1$  Hz, 1H), 3.70 – 3.62 (m, 2H), 3.47 – 3.37 (m, 1H), 2.37 – 2.18 (m, 1H), 1.64 – 1.50 (m, 2H), 1.34 (d,  $J = 7.0$  Hz, 3H), 1.00 (d,  $J = 6.8$  Hz, 3H).

**$^{13}\text{C NMR}$**  (126 MHz,  $\text{CDCl}_3$ )  $\delta$  146.2, 134.4, 134.0, 128.4, 127.1, 126.0, 61.4, 42.2, 39.8, 33.8, 21.5, 21.1.

**ESIMS** found 205.2 (calculated for  $[\text{C}_{14}\text{H}_{21}\text{O}]^+$ : 205.2)

**IR** (thin film,  $\text{cm}^{-1}$ ): 3335, 3027, 2962, 2928, 1493, 1053.

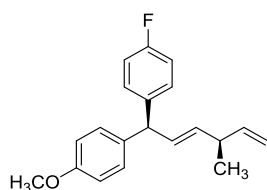

**1-Fluoro-4-((1S,4R,E)-1-(4-methoxyphenyl)-4-methylhexa-2,5-dien-1-yl)benzene (11b)**

The substrate was run in 0.4 mmol scale following the general procedure using (*E*)-crotylboronate. The crude mixture after the reaction was purified by flash column chromatography with hexanes to afford the pure product as a colorless oil.

**Yield:** 73 mg, 62%.

**e.r.:** 98:2.

**d.r.:** 15:1.

$[\alpha]_D^{22} = -3.9$  ( $c = 1.0$ ,  $\text{CHCl}_3$ ).

**HPLC Analysis**, this compound was converted to the corresponding terminal alcohol **S11b** following the hydroboration/oxidation procedure, tr minor: 25.6 min., tr major: 27.3 min., [Chiralpak®IA column, 24 cm  $\times$  4.6 mm I.D., hexanes:*i*-PrOH = 98:2, 1.0 mL/min, 250 nm].

**$^1\text{H NMR}$**  (500 MHz,  $\text{CDCl}_3$ )  $\delta$  7.15 – 7.07 (m, 2H), 7.10 – 7.03 (m, 2H), 7.01 – 6.93 (m, 2H), 6.87 – 6.80 (m, 2H), 5.90 – 5.71 (ovrlp, 2H), 5.36 (dd,  $J = 15.4, 6.8$  Hz, 1H), 5.03 – 4.88 (ovrlp, 2H), 4.63 (d,  $J = 7.3$  Hz, 1H), 3.79 (s, 3H), 2.97 – 2.86 (m, 1H), 1.11 (d,  $J = 6.9$  Hz, 3H).

**$^{13}\text{C NMR}$**  (126 MHz,  $\text{CDCl}_3$ )  $\delta$  161.3 (d,  $J = 244.4$  Hz), 158.0, 142.7, 140.1 (d,  $J = 3.2$  Hz), 136.0, 135.9, 131.6, 129.8 (d,  $J = 7.8$  Hz), 129.4, 115.0 (d,  $J = 21.1$  Hz), 113.8, 113.0, 55.2, 52.2, 40.2, 19.8.

**GCMS** found 296.2 (calculated for  $\text{C}_{20}\text{H}_{21}\text{FO}$ : 296.2).

**IR** (thin film,  $\text{cm}^{-1}$ ): 3005, 2961, 2930, 2870, 2838, 1606, 1509, 1251, 1178, 1038.

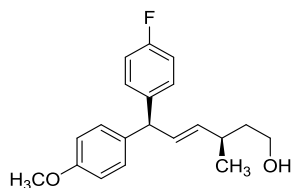

**(3R,6S,E)-6-(4-Fluorophenyl)-6-(4-methoxyphenyl)-3-methylhex-4-en-1-ol (S11b)**

This product was prepared following the general hydroboration/oxidation procedure in 0.2 mmol scale and the crude mixture was purified by flash column chromatography with hexanes:EtOAc (3:1) to afford the pure product as a colorless oil.

**Yield:** 35 mg, 56%.

**e.r.:** 98:2.

**d.r.:** 15:1.

$[\alpha]_D^{22} = -19.4$  ( $c = 1.0$ ,  $\text{CHCl}_3$ ).

**$^1\text{H NMR}$**  (500 MHz,  $\text{CDCl}_3$ )  $\delta$  7.13 – 7.08 (m, 2H), 7.05 (d,  $J = 8.4$  Hz, 2H), 7.00 – 6.92 (t,  $J = 8.6$  Hz, 2H), 6.84 (d,  $J = 8.4$  Hz, 2H), 5.85 (dd,  $J = 15.3, 7.4$  Hz, 1H), 5.28 (dd,  $J = 15.3, 8.0$  Hz, 1H), 4.61 (d,  $J = 7.4$  Hz, 1H), 3.78 (s, 3H), 3.64 (t,  $J = 6.6$  Hz, 2H), 2.42 – 2.32 (m, 1H), 1.74 – 1.45 (m, 2H), 1.03 (d,  $J = 6.7$  Hz, 3H).

**$^{13}\text{C NMR}$**  (126 MHz,  $\text{CDCl}_3$ )  $\delta$  161.3 (d,  $J = 244.4$  Hz), 158.0, 140.0 (d,  $J = 3.3$  Hz), 137.5, 136.0, 131.5, 129.8 (d,  $J = 7.9$  Hz), 129.3, 115.0 (d,  $J = 21.2$  Hz), 113.8, 61.3, 55.2, 52.2, 39.7, 33.8, 20.9.

**ESIMS** found 315.2 (calculated for  $[\text{C}_{20}\text{H}_{24}\text{FO}_2]^+$ : 315.2)

**IR** (thin film,  $\text{cm}^{-1}$ ): 3323, 2958, 2929, 2837, 1606, 1508, 1250, 1179, 1038, 977.

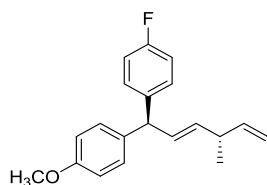

**1-Fluoro-4-((1S,4S,E)-1-(4-methoxyphenyl)-4-methylhexa-2,5-dien-1-yl)benzene (12b)**

The substrate was run in 0.4 mmol scale following the general procedure using (*Z*)-crotylboronate. The crude mixture after the reaction was purified by flash column chromatography with hexanes to afford the pure product as a colorless oil.

**Yield:** 95 mg, 81%.

**e.r.:** 98:2.

**d.r.:** 9:1.

$[\alpha]_D^{22} = +18.3$  ( $c = 1.0$ ,  $\text{CHCl}_3$ ).

**HPLC Analysis**, this compound was converted to the corresponding terminal alcohol **S12b** following the hydroboration/oxidation procedure, tr major: 30.4 min., tr minor: 33.6 min., [Chiralpak®IA column, 24 cm  $\times$  4.6 mm I.D., hexanes:*i*-PrOH = 98:2, 1.0 mL/min, 250 nm].

**$^1\text{H NMR}$**  (500 MHz,  $\text{CDCl}_3$ )  $\delta$  7.15 – 7.10 (m, 2H), 7.08 (d,  $J = 8.4$  Hz, 2H), 7.01 – 6.94 (m, 2H), 6.89 – 6.82 (m, 2H), 5.90 – 5.72 (ovrlp, 2H), 5.37 (dd,  $J = 15.4, 6.8$  Hz, 1H), 5.04 – 4.90 (ovrlp, 2H), 4.64 (d,  $J = 7.3$  Hz, 1H), 3.80 (s, 3H), 2.97 – 2.86 (m, 1H), 1.12 (d,  $J = 6.9$  Hz, 3H).

**$^{13}\text{C NMR}$**  (126 MHz,  $\text{CDCl}_3$ )  $\delta$  161.3 (d,  $J = 244.2$  Hz), 158.1, 142.7, 140.1 (d,  $J = 3.2$  Hz), 136.0, 135.9, 131.6, 129.8 (d,  $J = 7.8$  Hz), 129.4, 115.0 (d,  $J = 21.1$  Hz), 113.8, 113.0, 55.2, 52.2, 40.2, 19.8.

**GCMS** found 296.2 (calculated for  $\text{C}_{20}\text{H}_{21}\text{FO}$ : 296.2).

IR (thin film,  $\text{cm}^{-1}$ ): 3005, 2961, 2930, 2839, 1606, 1509, 1251, 1038.

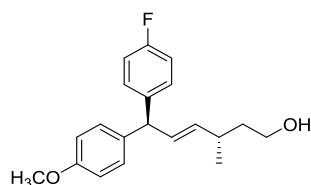

**(3*S*,6*S*,*E*)-6-(4-Fluorophenyl)-6-(4-methoxyphenyl)-3-methylhex-4-en-1-ol (S12b)**

This product was prepared following the general hydroboration/oxidation procedure in 0.2 mmol scale and the crude mixture was purified by flash column chromatography with hexanes:EtOAc (3:1) to afford the pure product as a colorless oil.

**Yield:** 44 mg, 70%.

**e.r.:** 98:2.

**d.r.:** 9:1.

$[\alpha]_D^{22} = +18.3$  ( $c = 1.0$ ,  $\text{CHCl}_3$ ).

**$^1\text{H NMR}$**  (500 MHz,  $\text{CDCl}_3$ )  $\delta$  7.15 – 7.06 (m, 2H), 7.09 – 7.02 (m, 2H), 7.01 – 6.92 (m, 2H), 6.87 – 6.80 (m, 2H), 5.85 (dd,  $J = 15.3, 7.4$  Hz, 1H), 5.28 (dd,  $J = 15.3, 8.1$  Hz, 1H), 4.61 (d,  $J = 7.4$  Hz, 1H), 3.79 (s, 3H), 3.64 (td,  $J = 6.6, 2.8$  Hz, 2H), 2.43 – 2.24 (m, 1H), 1.65 – 1.47 (m, 2H), 1.22 (br, 1H), 1.03 (d,  $J = 6.7$  Hz, 3H).

**$^{13}\text{C NMR}$**  (126 MHz,  $\text{CDCl}_3$ )  $\delta$  161.3 (d,  $J = 244.4$  Hz), 158.0, 140.0 (d,  $J = 3.0$  Hz), 137.5, 135.9, 131.5, 129.8 (d,  $J = 7.8$  Hz), 129.3, 115.1 (d,  $J = 21.3$  Hz) 113.8, 61.3, 55.2, 52.2, 39.7, 33.8, 20.9.

**ESIMS** found 315.2 (calculated for  $[\text{C}_{20}\text{H}_{24}\text{FO}_2]^+$ : 315.2)

IR (thin film,  $\text{cm}^{-1}$ ): 3330, 2958, 2929, 2837, 1606, 1508, 1250, 1179, 1038.

## I. General Procedure to Prepare Racemic 1,4-Dienes ( $\pm$ )-14

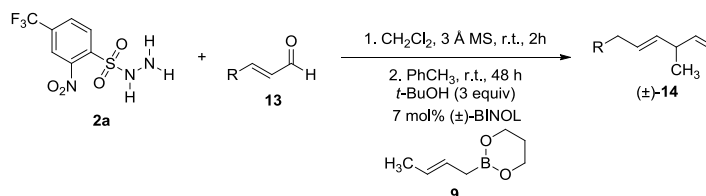

2-Nitro-4-(trifluoromethyl)benzenesulfonylhydrazide (0.4 mmol), a non-branched enal (0.4 mmol), and oven-dried 3 Å powdered molecular sieves (200 mg) were added to a 10 mL reaction vial equipped with a magnetic stir bar. Dichloromethane (1.0 mL) was added to the vial and the reaction mixture was stirred at room temperature for 2 h, at which time the reaction mixture was concentrated first by rotary evaporation and then by static pressure vacuum (2 – 10 Torr) for 10 min. Racemic BINOL (0.06 mmol, 10 mol%), *tert*-butanol (3 equiv, 1.2 mmol) and (*E*)-crotylboronate (1.5 equiv, 0.6 mmol) were added and rinsed into the solution with anhydrous toluene (0.2 mL). The reaction was applied to sonication for 5 min to facilitate dissolution. The vial was then sealed with a rubber septum and attached to a balloon filled with argon. The mixture was allowed to stir at room temperature for 48 h, at which time the crude mixture was chromatographed on silica gel to afford the desired product.



### m. General Procedure to Prepare Enantioenriched 1,4-Dienes 14

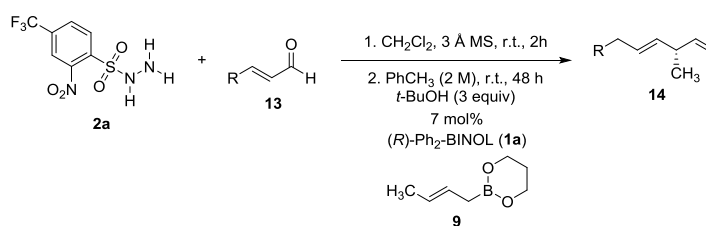

2-Nitro-4-(trifluoromethyl)benzenesulfonylhydrazide (0.4 mmol), a non-branched enal (0.4 mmol), and oven-dried 3 Å powdered molecular sieves (200 mg) were added to a 10 mL reaction vial equipped with a magnetic stir bar. Dichloromethane (1.0 mL) was added to the vial and the reaction mixture was stirred at room temperature for 2 h, at which time the reaction mixture was concentrated first by rotary evaporation and then by static pressure vacuum (2 – 10 Torr) for 10 min. (*R*)-Ph<sub>2</sub>-BINOL (0.04 mmol, 7 mol%), *tert*-butanol (3 equiv, 1.2 mmol) and (*E*)-crotylboronate (1.5 equiv, 0.6 mmol) were added and rinsed into the solution with anhydrous toluene (0.2 mL). The reaction was applied to sonication for 5 min to facilitate dissolution. The vial was then sealed with a rubber septum and attached to a balloon filled with argon. The mixture was allowed to stir at room temperature for 48 h, at which time the crude mixture was chromatographed on silica gel to afford the desired product.

### n. Analytical Data for 1,4-Dienes 14

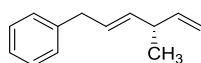

#### (*S,E*)-(4-Methylhexa-2,5-dien-1-yl)benzene (**14a**)

The substrate was run in 0.4 mmol scale following the general procedure. The crude mixture after the reaction was purified by flash column chromatography with hexanes to afford the pure product as a colorless oil.

**Yield:** 59 mg, 85%.

**e.r.:** 97:3.

**[ $\alpha$ ]<sub>D</sub><sup>22</sup>** = +10.2 (c = 1.0, CHCl<sub>3</sub>).

**HPLC Analysis**, this compound was converted to the corresponding terminal alcohol **S14a** following the hydroboration/oxidation procedure, tr major: 22.5 min., tr minor: 24.8 min., [Chiralpak®IA column, 24 cm × 4.6 mm I.D., hexanes:EtOH = 99.5:0.5, 1.0 mL/min, 210 nm].

**<sup>1</sup>H NMR** (500 MHz, CDCl<sub>3</sub>) δ 7.35 – 7.24 (m, 2H), 7.24 – 7.14 (ovrlp, 3H), 5.81 (ddd, *J* = 17.1, 10.3, 6.6 Hz, 1H), 5.64 – 5.54 (m, 1H), 5.49 (dd, *J* = 15.4, 6.6 Hz, 1H), 5.06 – 4.90 (ovrlp, 2H), 3.36 (d, *J* = 6.6 Hz, 2H), 2.92 – 2.83 (m, 1H), 1.11 (d, *J* = 7.0 Hz, 3H).

**<sup>13</sup>C NMR** (126 MHz, CDCl<sub>3</sub>) δ 143.0, 140.9, 135.5, 128.5, 128.3, 127.8, 125.9, 112.7, 40.2, 39.0, 19.9.

**GCMS** found 172.1 (calculated for C<sub>13</sub>H<sub>16</sub>: 172.1).

**IR** (thin film, cm<sup>-1</sup>): 3084, 3064, 3028, 2966, 2927, 2871, 1636, 1604, 1495, 1453, 1217, 971.

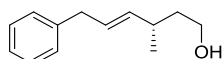

#### (*S,E*)-3-Methyl-6-phenylhex-4-en-1-ol (**S14a**)

This product was prepared following the general hydroboration/oxidation procedure in 0.3 mmol scale

and the crude mixture was purified by flash column chromatography with hexanes/EtOAc: 3/1 to afford the pure product as a colorless oil.

**Yield:** 46 mg, 80%.

**e.r.:** 97:3.

$[\alpha]_D^{22} = +24.9$  (c = 1.0, CHCl<sub>3</sub>).

**<sup>1</sup>H NMR** (500 MHz, CDCl<sub>3</sub>) δ 7.33 – 7.25 (m, 2H), 7.23 – 7.14 (ovrlp, 3H), 5.59 (dt, *J* = 15.0, 6.8 Hz, 1H), 5.41 (dd, *J* = 15.0, 8.0 Hz, 1H), 3.70 – 3.62 (m, 2H), 3.34 (d, *J* = 6.8 Hz, 2H), 2.36 – 2.24 (m, 1H), 1.66 – 1.46 (m, 2H), 1.28 (t, *J* = 5.4 Hz, 1H), 1.03 (d, *J* = 6.7 Hz, 3H).

**<sup>13</sup>C NMR** (126 MHz, CDCl<sub>3</sub>) δ 140.8, 137.3, 128.4, 128.4, 127.8, 125.9, 61.4, 39.8, 39.0, 33.8, 21.0.

**ESIMS** found 191.1 (calculated for [C<sub>13</sub>H<sub>19</sub>O]<sup>+</sup>: 191.1)

**IR** (thin film, cm<sup>-1</sup>): 3339, 3027, 2959, 2926, 1603, 1495, 1453, 1375, 1218, 1056, 972.

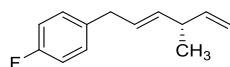

**(*S,E*)-1-Fluoro-4-(4-methylhexa-2,5-dien-1-yl)benzene (14b)**

The substrate was run in 0.4 mmol scale following the general procedure but at 50 °C in 24 h. The crude mixture after the reaction was purified by flash column chromatography with hexanes to afford the pure product as a colorless oil.

**Yield:** 49 mg, 65%.

**e.r.:** 97:3.

$[\alpha]_D^{22} = +9.2$  (c = 1.0, CHCl<sub>3</sub>).

**HPLC Analysis**, this compound was converted to the corresponding terminal alcohol **S14b** following the hydroboration/oxidation procedure, tr major: 40.3 min., tr minor: 44.2 min., [Chiralpak®AD-H column, 24 cm × 4.6 mm I.D., hexanes:*i*-PrOH = 99.6:0.4, 1.0 mL/min, 210 nm].

**<sup>1</sup>H NMR** (500 MHz, CDCl<sub>3</sub>) δ 7.21 – 7.04 (m, 2H), 7.01 – 6.93 (m, 2H), 5.81 (ddd, *J* = 16.9, 10.3, 7.1 Hz, 1H), 5.59 – 5.51 (m, 1H), 5.47 (dd, *J* = 15.3, 6.5 Hz, 1H), 5.07 – 4.87 (ovrlp, 2H), 3.32 (d, *J* = 6.4 Hz, 2H), 2.95 – 2.72 (m, 1H), 1.11 (d, *J* = 6.9 Hz, 3H).

**<sup>13</sup>C NMR** (126 MHz, CDCl<sub>3</sub>) δ 161.3 (d, *J* = 243.5 Hz), 142.9, 136.4 (d, *J* = 3.2 Hz), 135.7, 129.8 (d, *J* = 7.8 Hz), 127.7, 115.0 (d, *J* = 21.1 Hz), 112.8, 40.2, 38.1, 19.9.

**GCMS** found 190.1 (calculated for C<sub>13</sub>H<sub>15</sub>F: 190.1).

**IR** (thin film, cm<sup>-1</sup>): 3080, 2968, 2929, 1605, 1509, 1223, 1157, 972.

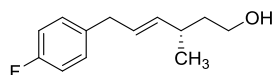

**(*S,E*)-6-(4-Fluorophenyl)-3-methylhex-4-en-1-ol (S14b)**

This product was prepared following the general hydroboration/oxidation procedure in 0.15 mmol scale and the crude mixture was purified by flash column chromatography with hexanes/EtOAc: 3/1 to afford the pure product as a colorless oil.

**Yield:** 22 mg, 70%.

**e.r.:** 97:3.

$[\alpha]_D^{22} = +25.1$  (c = 1.0, CHCl<sub>3</sub>).

**<sup>1</sup>H NMR** (500 MHz, CDCl<sub>3</sub>) δ 7.15 – 7.08 (m, 2H), 7.01 – 6.92 (m, 2H), 5.55 (dt, *J* = 14.5, 6.7 Hz, 1H), 5.38 (dd, *J* = 14.5, 8.0 Hz, 1H), 3.65 (t, *J* = 7.2 Hz, 2H), 3.29 (d, *J* = 6.7 Hz, 2H), 2.36 – 2.25 (m, 1H), 1.62 – 1.53 (m, 2H), 1.31 (br, 1H), 1.02 (d, *J* = 6.7 Hz, 3H).

$^{13}\text{C}$  NMR (126 MHz,  $\text{CDCl}_3$ )  $\delta$  161.3 (d,  $J = 243.5$  Hz), 137.4, 136.4 (d,  $J = 3.2$  Hz), 129.7 (d,  $J = 7.8$  Hz), 127.7, 115.1 (d,  $J = 21.2$  Hz), 61.3, 39.7, 38.1, 33.7, 21.0.

$^{19}\text{F}$  NMR (470 MHz,  $\text{CDCl}_3$ )  $\delta$  -117.7 (ddd,  $J = 14.3, 9.0, 5.5$  Hz).

ESIMS found 209.1 (calculated for  $[\text{C}_{13}\text{H}_{18}\text{FO}]^+$ : 209.1)

IR (thin film,  $\text{cm}^{-1}$ ): 3384, 2960, 2931, 1601, 1509, 1222, 1157, 1058, 974.

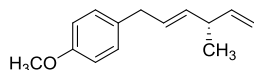

**(*S,E*)-1-Methoxy-4-(4-methylhexa-2,5-dien-1-yl)benzene (14c)**

The substrate was run in 0.4 mmol scale following the general procedure but at 50 °C in 24 h. The crude mixture after the reaction was purified by flash column chromatography with hexanes/EtOAc: 50/1 to afford the pure product as a colorless oil.

**Yield:** 65 mg, 81%.

**e.r.:** 98:2.

$[\alpha]_{\text{D}}^{22} = +5.7$  ( $c = 1.0$ ,  $\text{CHCl}_3$ ).

**HPLC Analysis**, this compound was converted to the corresponding terminal alcohol **S14c** following the hydroboration/oxidation procedure, tr major: 31.8 min., tr minor: 34.5 min., [Chiralpak®IA column, 24 cm  $\times$  4.6 mm I.D., hexanes:EtOH = 99:1, 1.0 mL/min, 210 nm].

$^1\text{H}$  NMR (500 MHz,  $\text{CDCl}_3$ )  $\delta$  7.11 (d,  $J = 8.5$  Hz, 2H), 6.85 (d,  $J = 8.5$  Hz, 2H), 5.81 (ddd,  $J = 17.0, 10.3, 6.5$  Hz, 1H), 5.57 (dt,  $J = 15.4, 6.6$  Hz, 1H), 5.46 (dd,  $J = 15.4, 6.7$  Hz, 1H), 5.10 – 4.90 (ovrlp, 2H), 3.80 (s, 3H), 3.30 (d,  $J = 6.6$  Hz, 2H), 2.91 – 2.82 (m, 1H), 1.11 (d,  $J = 6.9$  Hz, 3H).

$^{13}\text{C}$  NMR (126 MHz,  $\text{CDCl}_3$ )  $\delta$  157.9, 143.0, 135.2, 132.9, 129.4, 128.2, 113.8, 112.7, 55.2, 40.2, 38.1, 19.9

GCMS found 202.1 (calculated for  $\text{C}_{14}\text{H}_{18}\text{O}$ : 202.1).

IR (thin film,  $\text{cm}^{-1}$ ): 3081, 2965, 2934, 2906, 2835, 1612, 1512, 1325, 1247, 1177, 1039.

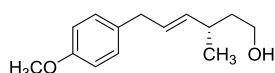

**(*S,E*)-6-(4-Methoxyphenyl)-3-methylhex-4-en-1-ol (S14c)**

This product was prepared following the general hydroboration/oxidation procedure in 0.3 mmol scale and the crude mixture was purified by flash column chromatography with hexanes:EtOAc (3:1) to afford the pure product as a colorless oil.

**Yield:** 50 mg, 75%.

**e.r.:** 98:2.

$[\alpha]_{\text{D}}^{22} = +17.8$  ( $c = 1.0$ ,  $\text{CHCl}_3$ ).

$^1\text{H}$  NMR (500 MHz,  $\text{CDCl}_3$ )  $\delta$  7.11 – 7.03 (m, 2H), 6.83 (d,  $J = 8.5$  Hz, 2H), 5.56 (dt,  $J = 15.2, 6.8$  Hz, 1H), 5.37 (dd,  $J = 15.2, 8.0$  Hz, 1H), 3.79 (s, 3H), 3.69 – 3.60 (m, 2H), 3.27 (d,  $J = 6.8$  Hz, 2H), 2.35 – 2.23 (m, 1H), 1.62 – 1.46 (m, 2H), 1.31 – 1.19 (m, 1H), 1.02 (d,  $J = 6.8$  Hz, 3H).

$^{13}\text{C}$  NMR (126 MHz,  $\text{CDCl}_3$ )  $\delta$  157.9, 136.9, 132.9, 129.3, 128.2, 113.8, 61.4, 55.3, 39.8, 38.0, 33.8, 21.0.

ESIMS found 221.1 (calculated for  $[\text{C}_{14}\text{H}_{21}\text{O}_2]^+$ : 221.1)

IR (thin film,  $\text{cm}^{-1}$ ): 3382, 3015, 2929, 1512, 1216, 1039, 755.

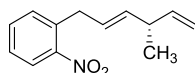

**(*S,E*)-1-(4-Methylhexa-2,5-dien-1-yl)-2-nitrobenzene (14d)**

The substrate was run in 0.4 mmol scale following the general procedure but at 50 °C in 24 h. The crude mixture after the reaction was purified by flash column chromatography with hexanes:EtOAc (50:1) to afford the pure product as a colorless oil.

**Yield:** 69 mg, 79%.

**e.r.:** 98:2.

**[ $\alpha$ ]<sub>D</sub><sup>22</sup>** = +5.2 (c = 1.0, CHCl<sub>3</sub>).

**HPLC Analysis**, this compound was converted to the corresponding terminal alcohol **S14d** following the hydroboration/oxidation procedure, tr minor: 47.0 min., tr major: 57.0 min., [Chiralpak®IA column, 24 cm × 4.6 mm I.D., hexanes:EtOH = 98:2, 1.0 mL/min, 254 nm].

**<sup>1</sup>H NMR** (500 MHz, CDCl<sub>3</sub>)  $\delta$  7.88 (d, *J* = 7.5 Hz, 1H), 7.52 (dd, *J* = 8.5, 7.5 Hz, 1H), 7.40 – 7.30 (ovrlp, 2H), 5.77 (ddd, *J* = 16.9, 10.3, 6.5 Hz, 1H), 5.55 (dt, *J* = 15.3, 6.2 Hz, 1H), 5.49 (dd, *J* = 15.3, 6.5 Hz, 1H), 5.04 – 4.90 (ovrlp, 2H), 3.63 (d, *J* = 6.2 Hz, 2H), 2.92 – 2.77 (m, 1H), 1.08 (d, *J* = 6.9 Hz, 3H).

**<sup>13</sup>C NMR** (126 MHz, CDCl<sub>3</sub>)  $\delta$  149.3, 142.6, 137.0, 135.6, 132.9, 131.7, 127.1, 125.4, 124.5, 113.0, 40.2, 35.8, 19.7.

**GCMS** found 217.1 (calculated for C<sub>13</sub>H<sub>15</sub>NO<sub>2</sub>: 217.1).

**IR** (thin film, cm<sup>-1</sup>): 3070, 2962, 2929, 2864, 1698, 1528, 1353, 1128, 916.

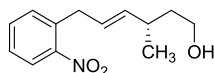

**(*S,E*)-3-Methyl-6-(2-nitrophenyl)hex-4-en-1-ol (S14d)**

This product was prepared following the general hydroboration/oxidation procedure in 0.3 mmol scale and the crude mixture was purified by flash column chromatography with hexanes:EtOAc (3:1) to afford the pure product as a colorless oil.

**Yield:** 45 mg, 64%.

**e.r.:** 98:2.

**[ $\alpha$ ]<sub>D</sub><sup>22</sup>** = +18.5 (c = 1.0, CHCl<sub>3</sub>).

**<sup>1</sup>H NMR** (500 MHz, CDCl<sub>3</sub>)  $\delta$  7.90 – 7.83 (m, 1H), 7.56 – 7.46 (m, 1H), 7.38 – 7.33 (ovrlp, 2H), 5.55 (dtd, *J* = 15.3, 6.5, 0.9 Hz, 1H), 5.39 (ddt, *J* = 15.3, 8.1, 1.4 Hz, 1H), 3.74 – 3.45 (ovrlp, 4H), 2.38 – 2.17 (m, 1H), 1.66 – 1.45 (m, 2H), 1.25 (t, *J* = 5.1 Hz, 1H), 1.00 (d, *J* = 6.8 Hz, 3H).

**<sup>13</sup>C NMR** (101 MHz, CDCl<sub>3</sub>)  $\delta$  149.4, 138.6, 135.5, 132.9, 131.7, 127.2, 125.3, 124.6, 61.2, 39.6, 35.8, 33.8, 20.8.

**ESIMS** found 236.1 (calculated for [C<sub>13</sub>H<sub>18</sub>NO<sub>3</sub>]<sup>+</sup>: 236.1)

**IR** (thin film, cm<sup>-1</sup>): 3357, 2960, 2926, 2873, 1610, 1526, 1448, 1352, 1057, 975, 858.

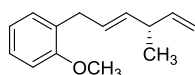

**(*S,E*)-1-Methoxy-2-(4-methylhexa-2,5-dien-1-yl)benzene (14e)**

The substrate was run in 0.4 mmol scale following the general procedure. The crude mixture after the reaction was purified by flash column chromatography with hexanes:EtOAc (100:1) to afford the pure product as a colorless oil.

**Yield:** 65 mg, 81%.

e.r.: 99:1.

$[\alpha]_D^{22} = +7.9$  ( $c = 1.0$ ,  $\text{CHCl}_3$ ).

**HPLC Analysis**, this compound was converted to the corresponding terminal alcohol **S14e** following the hydroboration/oxidation procedure, tr major: 31.9 min., tr minor: 34.7 min., [Chiralpak®AD-H column, 24 cm × 4.6 mm I.D., hexanes:EtOH = 99.5:0.5, 1.0 mL/min, 254 nm].

**<sup>1</sup>H NMR** (500 MHz,  $\text{CDCl}_3$ )  $\delta$  7.19 (dd,  $J = 8.0, 7.6$  Hz, 1H), 7.14 (d,  $J = 7.4$  Hz, 1H), 6.91 (dd,  $J = 7.6, 7.4$  Hz, 1H), 6.86 (d,  $J = 8.0$  Hz, 1H), 5.81 (ddd,  $J = 16.9, 10.3, 6.5$  Hz, 1H), 5.59 (dt,  $J = 14.8, 6.7$  Hz, 1H), 5.46 (dd,  $J = 14.8, 6.8$  Hz, 1H), 5.04 – 4.90 (ovrlp, 2H), 3.83 (s, 3H), 3.35 (d,  $J = 6.7$  Hz, 2H), 2.92 – 2.79 (m, 1H), 1.10 (d,  $J = 6.9$  Hz, 3H).

**<sup>13</sup>C NMR** (126 MHz,  $\text{CDCl}_3$ )  $\delta$  157.2, 143.2, 135.1, 129.6, 129.4, 127.2, 127.1, 120.4, 112.5, 110.3, 55.3, 40.2, 32.9, 19.9.

**GCMS** found 202.1 (calculated for  $\text{C}_{14}\text{H}_{18}\text{O}$ : 202.1).

**IR** (thin film,  $\text{cm}^{-1}$ ): 3076, 2961, 2836, 1601, 1493, 1465, 1244, 1111, 1033.

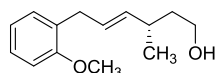

**(*S,E*)-6-(2-Methoxyphenyl)-3-methylhex-4-en-1-ol (S14e)**

This product was prepared following the general hydroboration/oxidation procedure in 0.3 mmol scale and the crude mixture was purified by flash column chromatography with hexanes/EtOAc (3/1) to afford the pure product as a colorless oil.

**Yield:** 48 mg, 72%.

e.r.: 99:1.

$[\alpha]_D^{22} = +15.6$  ( $c = 1.0$ ,  $\text{CHCl}_3$ ).

**<sup>1</sup>H NMR** (500 MHz,  $\text{CDCl}_3$ )  $\delta$  7.19 (dd,  $J = 8.0, 7.6$  Hz, 1H), 7.12 (d,  $J = 7.4$  Hz, 1H), 6.90 (dd,  $J = 7.6, 7.4$  Hz, 1H), 6.85 (d,  $J = 8.0$  Hz, 1H), 5.59 (dt,  $J = 15.8, 6.6$  Hz, 1H), 5.36 (dd,  $J = 15.8, 8.2$  Hz, 1H), 3.82 (s, 3H), 3.67 – 3.61 (m, 2H), 3.32 (d,  $J = 6.6$  Hz, 2H), 2.33 – 2.22 (m, 1H), 1.66 – 1.45 (m, 2H), 1.41 (br, 1H), 1.00 (d,  $J = 6.7$  Hz, 3H).

**<sup>13</sup>C NMR** (126 MHz,  $\text{CDCl}_3$ )  $\delta$  157.2, 136.8, 129.6, 129.2, 127.3, 127.2, 120.5, 110.3, 61.6, 55.3, 39.9, 34.4, 33.1, 21.1.

**ESIMS** found 221.1 (calculated for  $[\text{C}_{14}\text{H}_{21}\text{O}_2]^+$ : 221.1)

**IR** (thin film,  $\text{cm}^{-1}$ ): 3384, 2930, 2835, 1601, 1493, 1464, 1244, 1051.

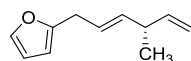

**(*S,E*)-2-(4-Methylhexa-2,5-dien-1-yl)furan (14f)**

The substrate was run in 0.4 mmol scale following the general procedure. The crude mixture after the reaction was purified by flash column chromatography with hexanes to afford the pure product as a colorless oil.

**Yield:** 47 mg, 73%.

e.r.: 99:1.

$[\alpha]_D^{22} = +6.4$  ( $c = 1.0$ ,  $\text{CHCl}_3$ ).

**HPLC Analysis**, this compound was converted to the corresponding terminal alcohol **S14f** following the hydroboration/oxidation procedure, tr major: 18.5 min., tr minor: 20.8 min., [Chiralpak®AD-H column, 24 cm × 4.6 mm I.D., hexanes:EtOH = 99:1, 1.0 mL/min, 210 nm].

**<sup>1</sup>H NMR** (500 MHz, CDCl<sub>3</sub>) δ 7.32 (d, *J* = 1.9 Hz, 1H), 6.29 (dd, *J* = 3.0, 1.9 Hz, 1H), 6.00 (d, *J* = 3.0 Hz, 1H), 5.80 (ddd, *J* = 17.2, 10.3, 6.5 Hz, 1H), 5.60 – 5.45 (ovrlp, 2H), 5.08 – 4.92 (ovrlp, 2H), 3.35 (d, *J* = 4.4 Hz, 2H), 2.97 – 2.79 (m, 1H), 1.11 (d, *J* = 6.9 Hz, 3H).

**<sup>13</sup>C NMR** (126 MHz, CDCl<sub>3</sub>) δ 154.7, 142.7, 141.1, 136.5, 124.3, 112.9, 110.2, 105.1, 40.1, 31.4, 19.7.

**GCMS** found 162.1 (calculated for C<sub>11</sub>H<sub>14</sub>O: 162.1).

**IR** (thin film, cm<sup>-1</sup>): 3083, 2968, 2930, 1596, 1507, 1456, 1147, 1009, 970.

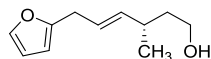

**(*S,E*)-6-(Furan-2-yl)-3-methylhex-4-en-1-ol (S14f)**

This product was prepared following the general hydroboration/oxidation procedure in 0.3 mmol scale and the crude mixture was purified by flash column chromatography with hexanes:EtOAc (3:1) to afford the pure product as a colorless oil.

**Yield:** 33 mg, 61%.

**e.r.:** 99:1.

**[α]<sub>D</sub><sup>22</sup>** = +13.4 (c = 1.0, CHCl<sub>3</sub>).

**<sup>1</sup>H NMR** (500 MHz, CDCl<sub>3</sub>) δ 7.33 – 7.29 (m, 1H), 6.28 (dd, *J* = 3.0, 1.9 Hz, 1H), 5.98 (d, *J* = 3.0 Hz, 1H), 5.55 (dt, *J* = 15.4, 6.5 Hz, 1H), 5.45 (dd, *J* = 15.4, 7.9 Hz, 1H), 3.66 (t, *J* = 6.0 Hz, 2H), 3.33 (d, *J* = 6.5 Hz, 2H), 2.36 – 2.26 (m, 1H), 1.65 – 1.45 (m, 2H), 1.32 (br, 1H), 1.02 (d, *J* = 6.8 Hz, 3H).

**<sup>13</sup>C NMR** (126 MHz, CDCl<sub>3</sub>) δ 154.6, 141.1, 138.3, 124.2, 110.2, 105.1, 61.3, 39.7, 33.9, 31.4, 20.8.

**ESIMS** found 181.1 (calculated for [C<sub>11</sub>H<sub>17</sub>O<sub>2</sub>]<sup>+</sup>: 181.1)

**IR** (thin film, cm<sup>-1</sup>): 3353, 2956, 2930, 2450, 1507, 1057, 1008, 971.

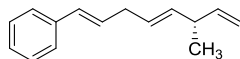

**((*S,1E,4E*)-6-Methylocta-1,4,7-trien-1-yl)benzene (14g)**

The substrate was run in 0.4 mmol scale following the general procedure but with 14 mol% catalyst. The crude mixture after the reaction was purified by flash column chromatography with hexanes to afford the pure product as a colorless oil.

**Yield:** 43 mg, 54%.

**e.r.:** 98:2.

**[α]<sub>D</sub><sup>22</sup>** = +4.2 (c = 1.0, CHCl<sub>3</sub>).

**HPLC Analysis**, this compound was converted to the corresponding terminal alcohol **S14g** following the hydroboration/oxidation procedure, tr major: 30.1 min., tr minor: 33.6 min., [Chiralcel@OD column, 24 cm × 4.6 mm I.D., hexanes:*i*-PrOH = 99:1, 1.0 mL/min, 230 nm].

**<sup>1</sup>H NMR** (500 MHz, CDCl<sub>3</sub>) δ 7.36 (d, *J* = 8.1 Hz, 2H), 7.30 (dd, *J* = 7.9, 7.7 Hz, 2H), 7.24 – 7.17 (m, 1H), 6.40 (d, *J* = 15.8 Hz, 1H), 6.23 (dt, *J* = 15.8, 6.0 Hz, 1H), 5.82 (ddd, *J* = 17.1, 10.3, 6.6 Hz, 1H), 5.53 – 5.47 (ovrlp, 2H), 5.02 (d, *J* = 17.1 Hz, 1H), 4.97 (d, *J* = 10.3 Hz, 1H), 2.93 (dd, *J* = 6.0, 5.4 Hz, 2H), 2.91 – 2.83 (m, 1H), 1.12 (d, *J* = 6.9 Hz, 3H).

**<sup>13</sup>C NMR** (126 MHz, CDCl<sub>3</sub>) δ 143.0, 137.7, 135.4, 130.4, 129.1, 128.5, 126.9, 126.7, 126.0, 112.7, 40.3, 35.9, 19.9.

**GCMS** found 198.1 (calculated for C<sub>15</sub>H<sub>18</sub>: 198.1).

**IR** (thin film, cm<sup>-1</sup>): 3060, 3026, 2966, 2928, 1636, 1495, 1450, 966, 913.

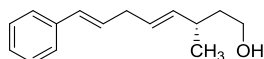

**(S,4E,7E)-3-Methyl-8-phenylocta-4,7-dien-1-ol (S14g)**

This product was prepared following the general hydroboration/oxidation procedure in 0.2 mmol scale and the crude mixture was purified by flash column chromatography with hexanes:EtOAc (3:1) to afford the pure product as a colorless oil.

**Yield:** 32 mg, 75%.

**e.r.:** 98:2.

$[\alpha]_D^{22} = +13.9$  ( $c = 1.0$ ,  $\text{CHCl}_3$ ).

**$^1\text{H NMR}$**  (500 MHz,  $\text{CDCl}_3$ )  $\delta$  7.35 (d,  $J = 7.4$  Hz, 2H), 7.32 – 7.27 (m, 2H), 7.22 – 7.17 (m, 1H), 6.38 (d,  $J = 16.0$  Hz, 1H), 6.20 (dt,  $J = 16.0, 6.6$  Hz, 1H), 5.51 (dt,  $J = 15.3, 6.5$  Hz, 1H), 5.39 (dd,  $J = 15.3, 7.8$  Hz, 1H), 3.71 – 3.63 (m, 2H), 2.90 (dd,  $J = 6.6, 6.5$  Hz, 2H), 2.38 – 2.23 (m, 1H), 1.65 – 1.53 (m, 2H), 1.25 (br, 1H), 1.02 (d,  $J = 6.7$  Hz, 3H).

**$^{13}\text{C NMR}$**  (126 MHz,  $\text{CDCl}_3$ )  $\delta$  137.6, 137.2, 130.4, 129.0, 128.5, 126.9, 126.7, 126.0, 61.4, 39.7, 35.8, 33.9, 21.0.

**ESIMS** found 217.2 (calculated for  $[\text{C}_{15}\text{H}_{21}\text{O}]^+$ : 217.2)

**IR** (thin film,  $\text{cm}^{-1}$ ): 3327, 3027, 2928, 1495, 1450, 1056, 969, 755.

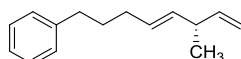

**(S,E)-(6-Methylocta-4,7-dien-1-yl)benzene (14h)**

The substrate was run in 0.4 mmol scale following the general procedure but with 14 mol% of 3,3'-Br<sub>2</sub>-BINOL catalyst. The crude mixture after the reaction was purified by flash column chromatography with hexanes to afford the pure product as a colorless oil.

**Yield:** 43 mg, 54%.

**e.r.:** 99:1.

$[\alpha]_D^{22} = +6.4$  ( $c = 1.0$ ,  $\text{CHCl}_3$ ).

**HPLC Analysis**, this compound was converted to the corresponding terminal alcohol **S14h** following the hydroboration/oxidation procedure, tr major: 30.1 min., tr minor: 33.6 min., [Chiralcel@OD column, 24 cm  $\times$  4.6 mm I.D., hexanes:*i*-PrOH = 99.6:0.4, 1.0 mL/min, 250 nm].

**$^1\text{H NMR}$**  (500 MHz,  $\text{CDCl}_3$ )  $\delta$  7.32 – 7.25 (m, 2H), 7.22 – 7.15 (ovrlp, 3H), 5.81 (ddd,  $J = 16.9, 10.3, 6.5$  Hz, 1H), 5.50 – 5.34 (ovrlp, 2H), 5.09 – 4.91 (ovrlp, 2H), 2.88 – 2.79 (m, 1H), 2.66 – 2.59 (m, 2H), 2.06 (td,  $J = 7.5, 5.7$  Hz, 2H), 1.77 – 1.64 (m, 2H), 1.10 (d,  $J = 6.9$  Hz, 3H).

**$^{13}\text{C NMR}$**  (126 MHz,  $\text{CDCl}_3$ )  $\delta$  143.3, 142.6, 134.5, 128.8, 128.4, 128.2, 125.6, 112.5, 40.3, 35.3, 32.1, 31.2, 20.0.

**GCMS** found 200.2 (calculated for  $\text{C}_{15}\text{H}_{20}$ : 200.2).

**IR** (thin film,  $\text{cm}^{-1}$ ): 3084, 3027, 2966, 2931, 2858, 1626, 1497, 1454, 970.

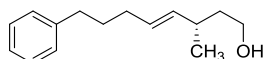

**(S,E)-3-Methyl-8-phenyloct-4-en-1-ol (S14h)**

This product was prepared following the general hydroboration/oxidation procedure in 0.2 mmol scale and the crude mixture was purified by flash column chromatography with hexanes:EtOAc (3:1) to afford the pure product as a colorless oil.

**Yield:** 30 mg, 68%.

**e.r.:** 99:1.

$[\alpha]_D^{22} = +18.7$  ( $c = 1.0$ ,  $\text{CHCl}_3$ ).

**$^1\text{H NMR}$**  (500 MHz,  $\text{CDCl}_3$ )  $\delta$  7.31 – 7.25 (m, 2H), 7.21 – 7.13 (ovrlp, 3H), 5.44 (dt,  $J = 15.2, 6.7$  Hz, 1H), 5.30 (dd,  $J = 15.2, 8.0$  Hz, 1H), 3.65 (t,  $J = 6.7$  Hz, 2H), 2.64 – 2.57 (m, 2H), 2.32 – 2.19 (m, 1H), 2.03 (td,  $J = 6.8, 6.7$  Hz, 2H), 1.68 (tt,  $J = 9.3, 6.8$  Hz, 2H), 1.62 – 1.47 (m, 2H), 1.28 (br, 1H), 1.00 (d,  $J = 6.8$  Hz, 3H).

**$^{13}\text{C NMR}$**  (126 MHz,  $\text{CDCl}_3$ )  $\delta$  142.5, 136.2, 128.8, 128.4, 128.2, 125.6, 61.4, 39.8, 35.3, 34.0, 32.0, 31.3, 21.2.

**ESIMS** found 219.2 (calculated for  $[\text{C}_{15}\text{H}_{22}\text{O}]^+$ : 219.2)

**IR** (thin film,  $\text{cm}^{-1}$ ): 3346, 3027, 2928, 2857, 1496, 1454, 1053, 971.

### o. Absolute Stereochemistry Determination for 1,4-Dienes

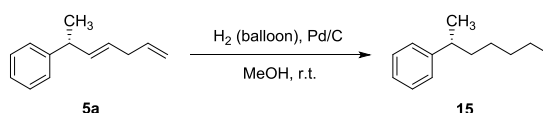

A 10-mL reaction vial equipped with a magnetic stir bar was charged with enantioenriched 1,4-diene (0.3 mmol). MeOH (3 mL), Pd/C (5 mg) were successively added to the vial. The reaction mixture was purged by hydrogen gas from a balloon for 10 min, after which time the balloon was refilled with hydrogen and the reaction was allowed to stir under the  $\text{H}_2$  atmosphere for 12 h at room temperature. The reaction mixture was filtered by a short pad of Celite, and condensed *in vacuo*. Chromatography on silica gel eluted by hexanes afforded the desired reduced product **15**.

**Yield:** 43 mg, 81%.

$[\alpha]_D^{22} = -12.7$  ( $c=1.0$ ,  $\text{CCl}_4$ ). In lit:<sup>[17]</sup>  $[\alpha]_D^{22} = -10$  ( $\text{CCl}_4$ ).

All spectra were in agreement with reported data.<sup>[18]</sup>

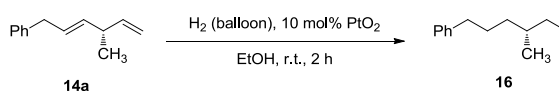

A 10-mL reaction vial equipped with a magnet stir bar was charged with enantioenriched 1,4-diene (0.3 mmol). EtOH (3 mL),  $\text{PtO}_2$  (10 mol%) were successively added to the vial. The reaction mixture was purged by hydrogen gas from a balloon for 10 min, after which time the balloon was refilled with hydrogen and the reaction was allowed to stir under the  $\text{H}_2$  atmosphere for 2 h at room temperature. The reaction mixture was filtered by a short pad of celite, and condensed *in vacuo*. Chromatography on silica gel eluted by hexanes afforded the desired reduced product **16**.

**Yield:** 26 mg, 50%.

$[\alpha]_D^{22} = +6.3$  ( $c=1.0$ ,  $\text{CHCl}_3$ ). In lit:<sup>[19]</sup>  $[\alpha]_D^{22} = +3.95$  (neat).

All spectra were in agreement with reported data.<sup>[19]</sup>



### 3. References

- [1] T. R. Wu, L. Shen, J. M. Chong, *Org. Lett.* **2004**, *6*, 2701-2704.
- [2] D. S. Barnett, P. N. Moquist, S. E. Schaus, *Angew. Chem. Int. Ed.* **2009**, *48*, 8679-8682.
- [3] Y. Jiang, A. B. Diagne, R. J. Thomson, S. E. Schaus, *J. Am. Chem. Soc.* **2017**.
- [4] a) C. Mou, T. Zhu, P. Zheng, S. Yang, B.-A. Song, Y. R. Chi, *Adv. Synth. Catal.* **2016**, *358*, 707-712; b) J. Takaya, K. Sasano, N. Iwasawa, *Org. Lett.* **2011**, *13*, 1698-1701.
- [5] G. Fronza, C. Fuganti, S. Serra, *Eur. J. Org. Chem.* **2009**, *2009*, 6160-6171.
- [6] D. Müller, A. Alexakis, *Chem. Eur. J.* **2013**, *19*, 15226-15239.
- [7] J. B. Metternich, R. Gilmour, *J. Am. Chem. Soc.* **2015**, *137*, 11254-11257.
- [8] a) Y. Tsuchiya, Y. Hamashima, M. Sodeoka, *Org. Lett.* **2006**, *8*, 4851-4854; b) K. Tanaka, G. C. Fu, *J. Org. Chem.* **2001**, *66*, 8177-8186.
- [9] K. Ren, B. Hu, M. Zhao, Y. Tu, X. Xie, Z. Zhang, *J. Org. Chem.* **2014**, *79*, 2170-2177.
- [10] M. Kimura, T. Yamazaki, T. Kitazume, T. Kubota, *Org. Lett.* **2004**, *6*, 4651-4654.
- [11] A. Cuetos, M. García-Ramos, E.-M. Fischereeder, A. Díaz-Rodríguez, G. Grogan, V. Gotor, W. Kroutil, I. Lavandera, *Angew. Chem. Int. Ed.* **2016**, *55*, 3144-3147.
- [12] D. Grassi, H. Li, A. Alexakis, *Chem. Commun.* **2012**, *48*, 11404-11406.
- [13] C. Ebner, A. Pfaltz, *Tetrahedron* **2011**, *67*, 10287-10290.
- [14] Y. Yamamoto, N. Kirai, Y. Harada, *Chem. Commun.* **2008**, 2010-2012.
- [15] B. You, K. Hamer, W. Lewis, J. Dowden, *Chem. Commun.* **2013**, *49*, 795-797.
- [16] a) R. Singh, S. K. Ghosh, *Tetrahedron* **2010**, *66*, 2284-2292; b) V. R. Yatham, J.-M. Neudorfl, N. E. Schlorer, A. Berkessel, *Chem. Sci.* **2015**, *6*, 3706-3711.
- [17] A. A. Merlo, H. Gallardo, *Synth. Commun.* **1993**, *23*, 2159-2169.
- [18] D. A. Everson, R. Shrestha, D. J. Weix, *J. Am. Chem. Soc.* **2010**, *132*, 920-921.
- [19] G. Heppke, H. Marschall, P. Nürnberg, F. Oestreicher, G. Scherowsky, *Chem. Ber.* **1981**, *114*, 2501-2518.

## 4. NMR Spectra

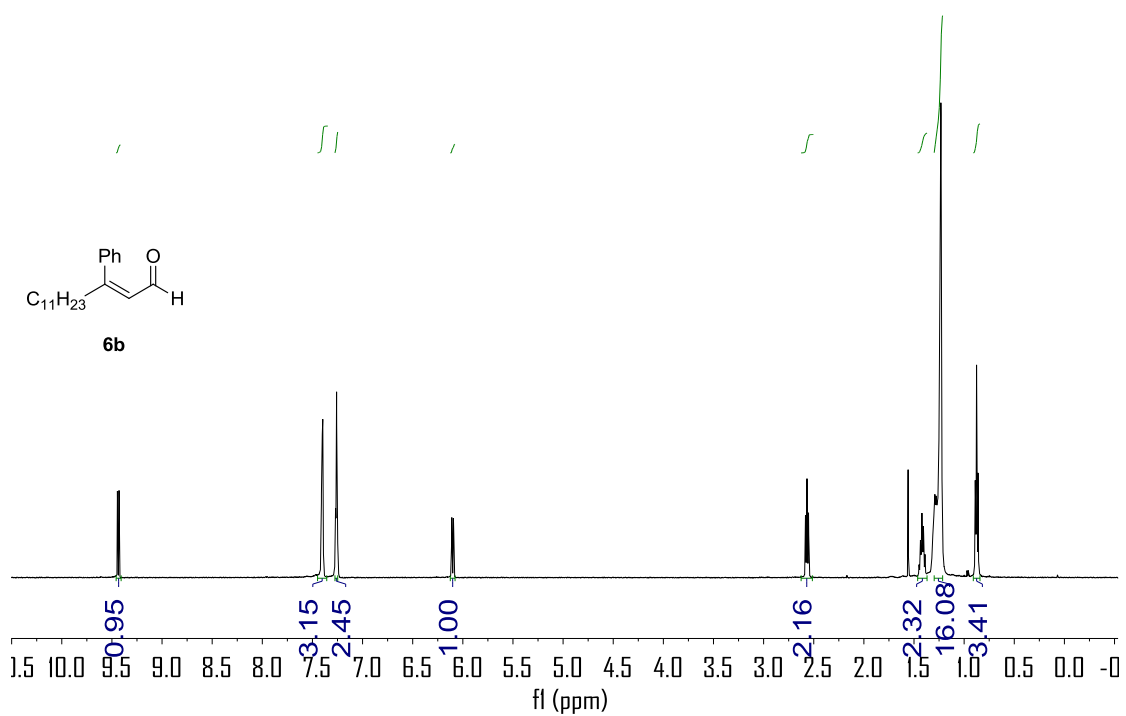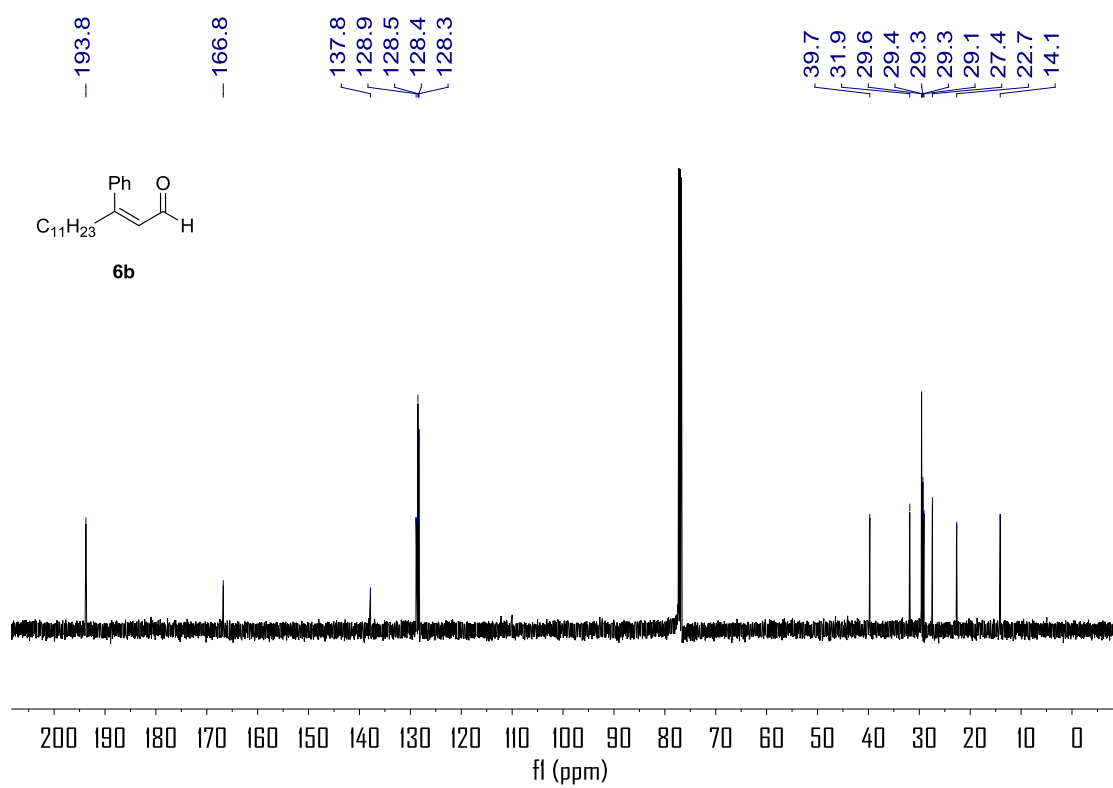

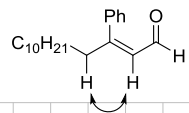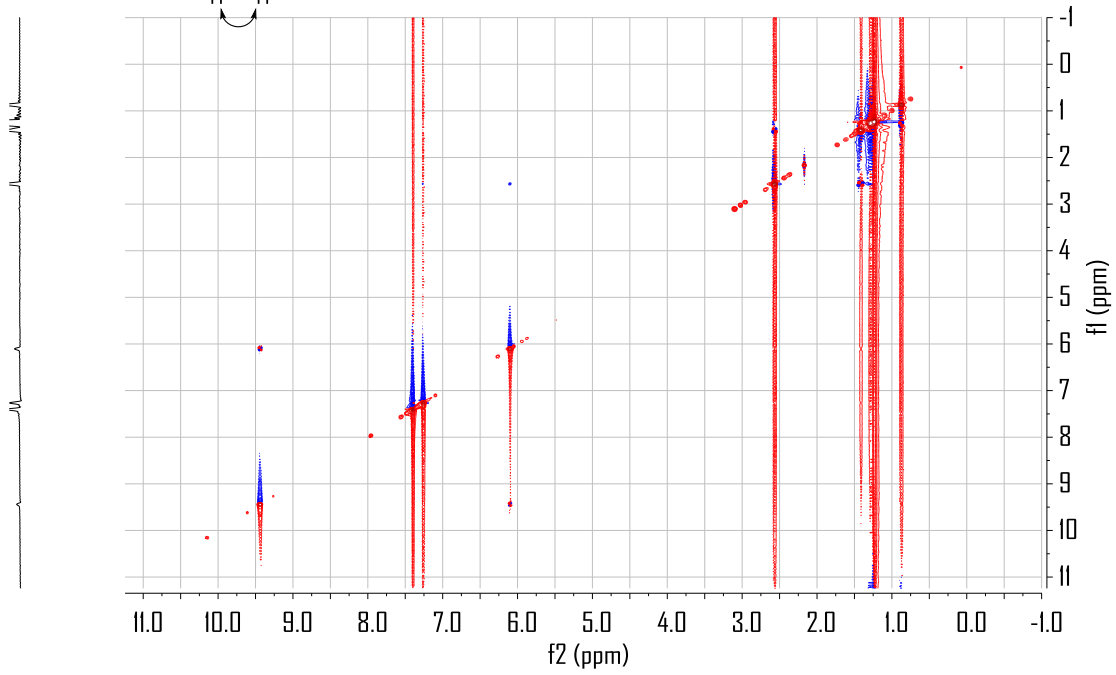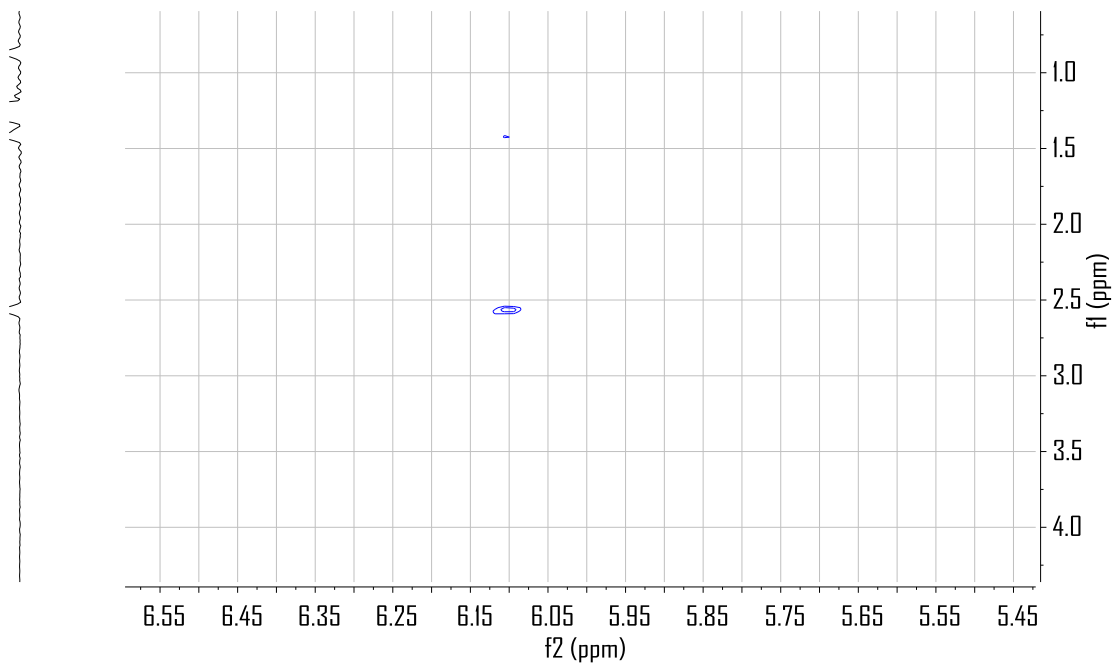

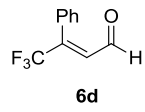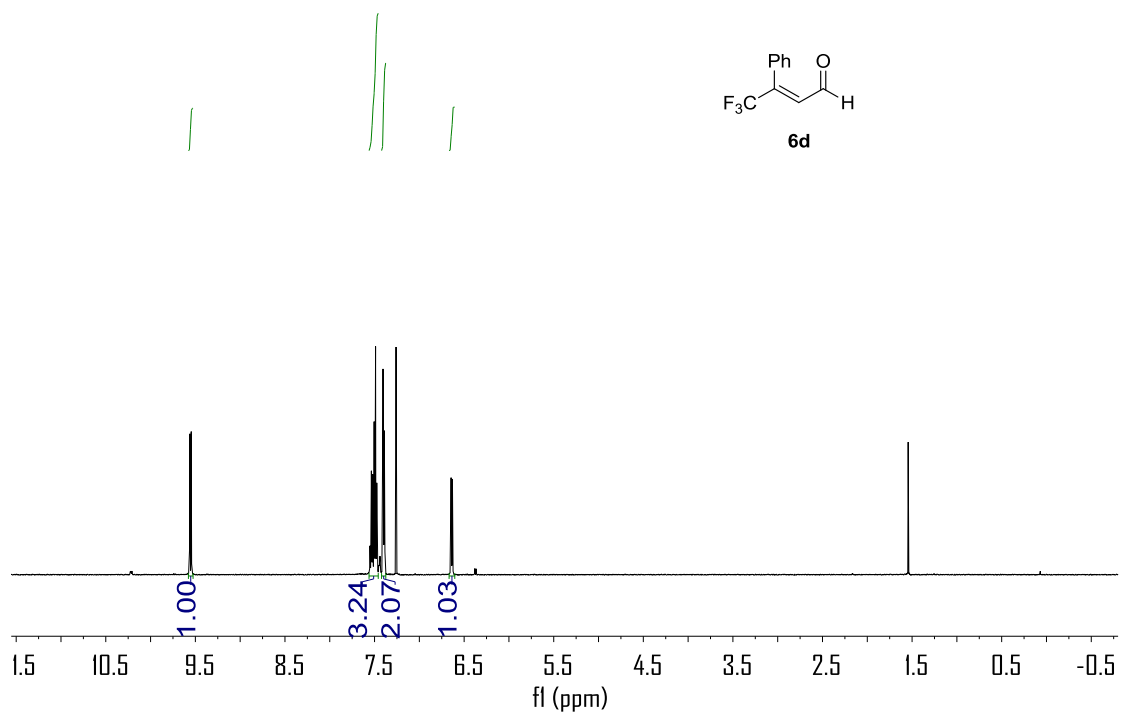

-191.5  
148.2  
147.9  
147.7  
147.4  
130.8  
130.5  
129.9  
128.8  
127.8  
126.0  
123.8  
121.6  
119.4

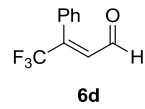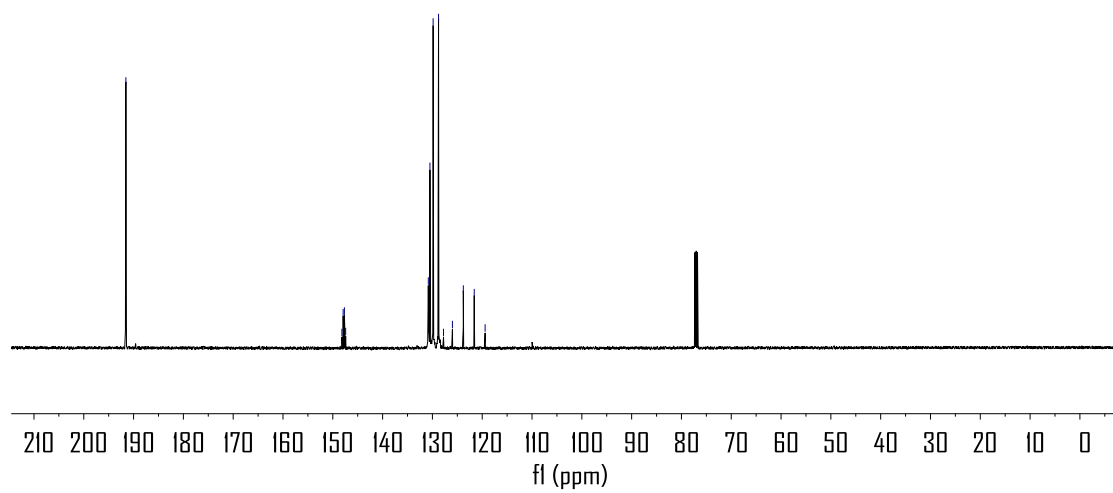

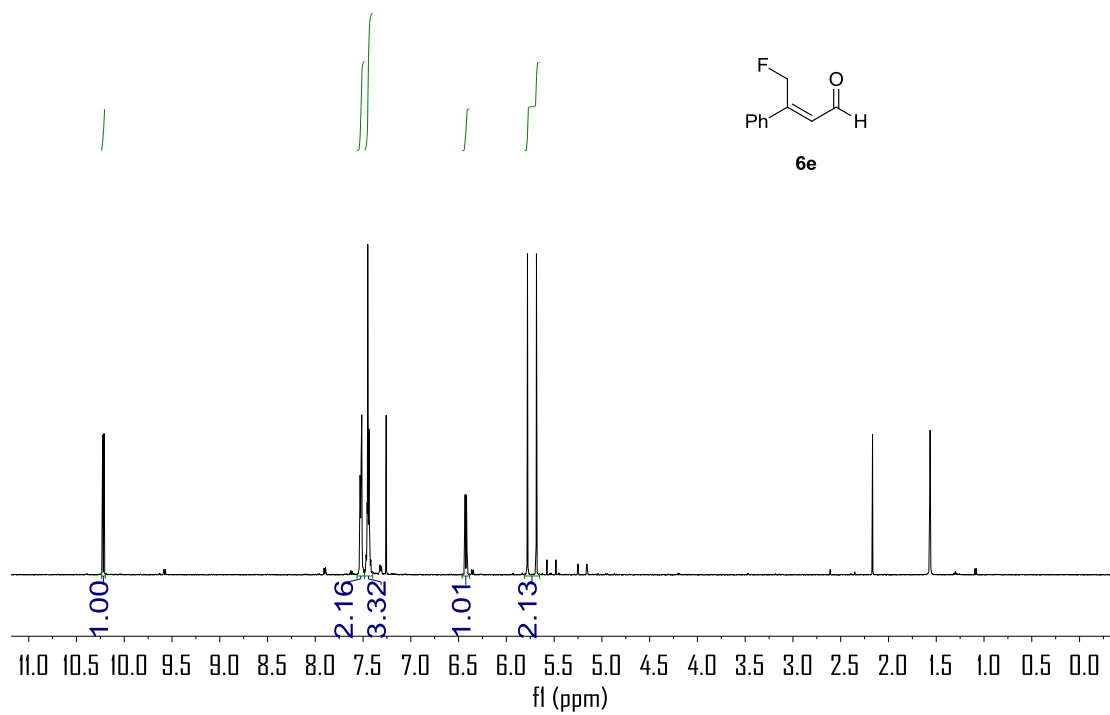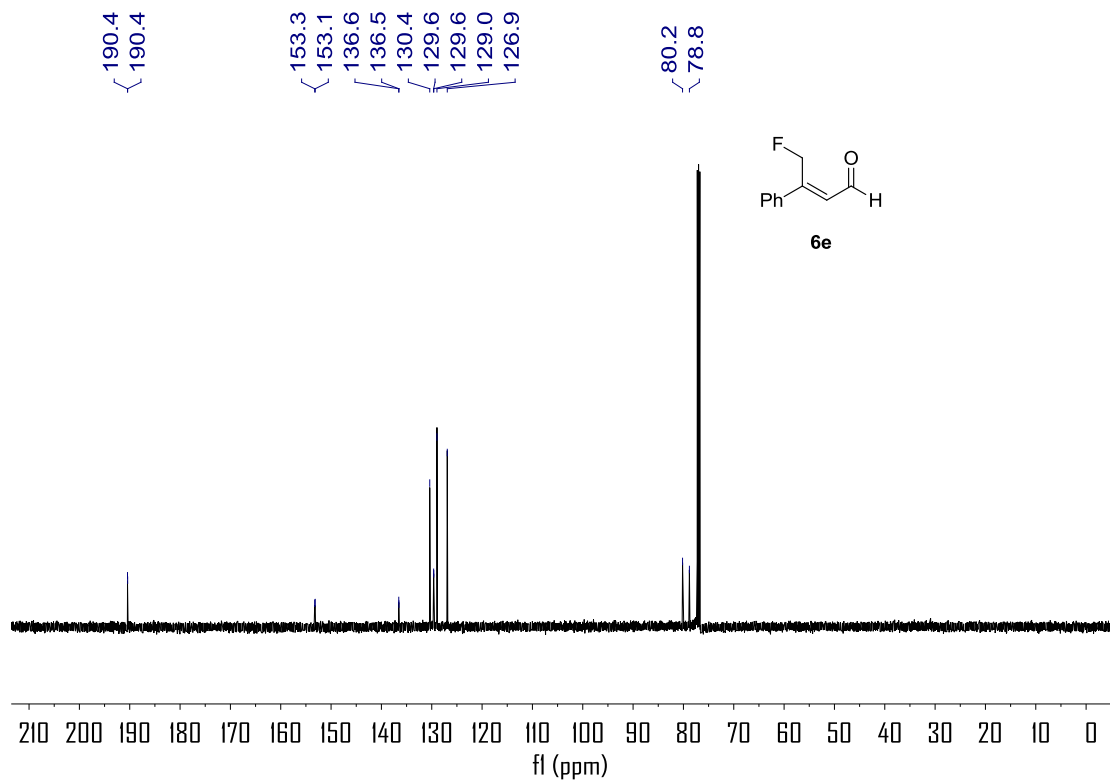

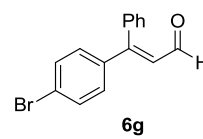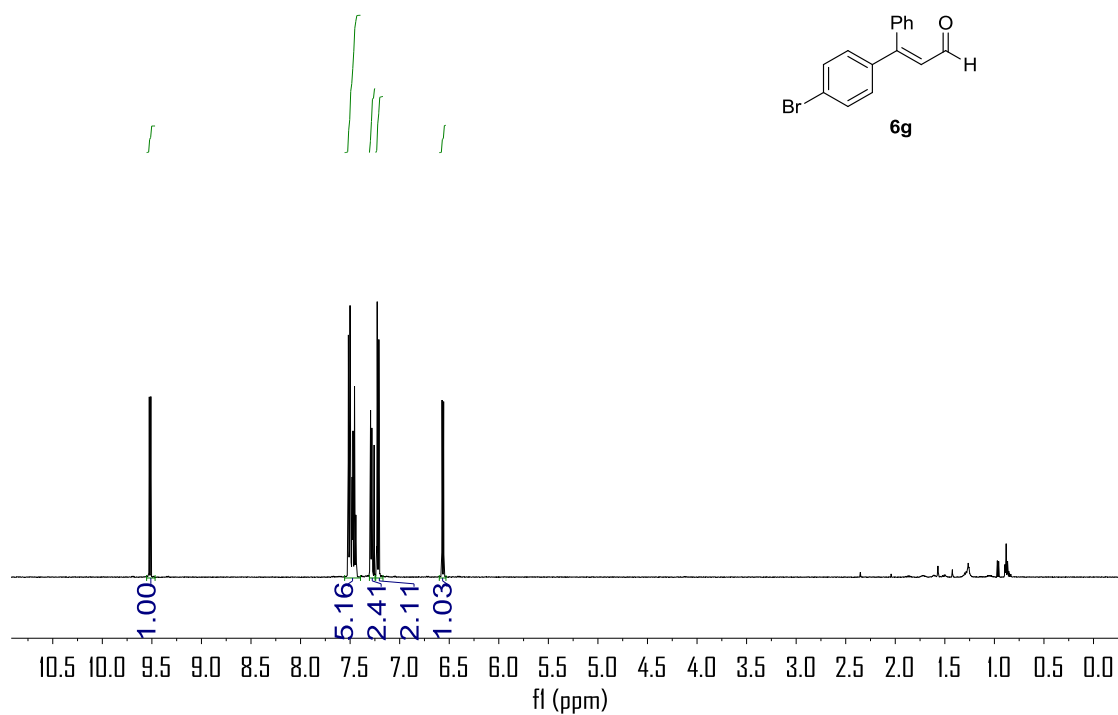

193.2  
160.8  
138.6  
136.1  
131.9  
130.7  
130.1  
129.7  
128.5  
127.4  
125.1

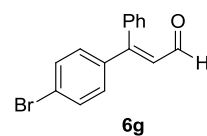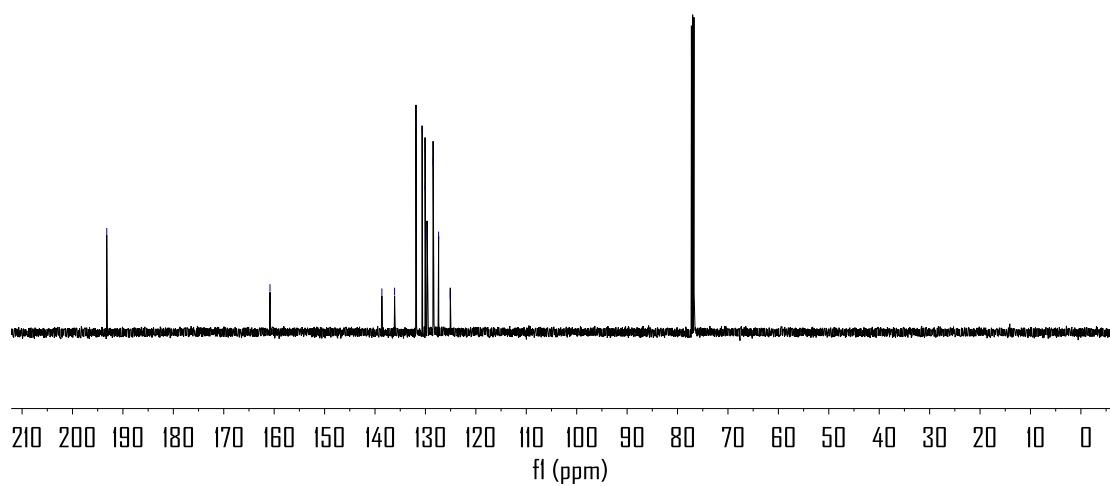

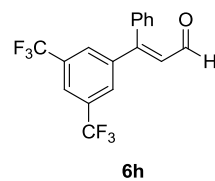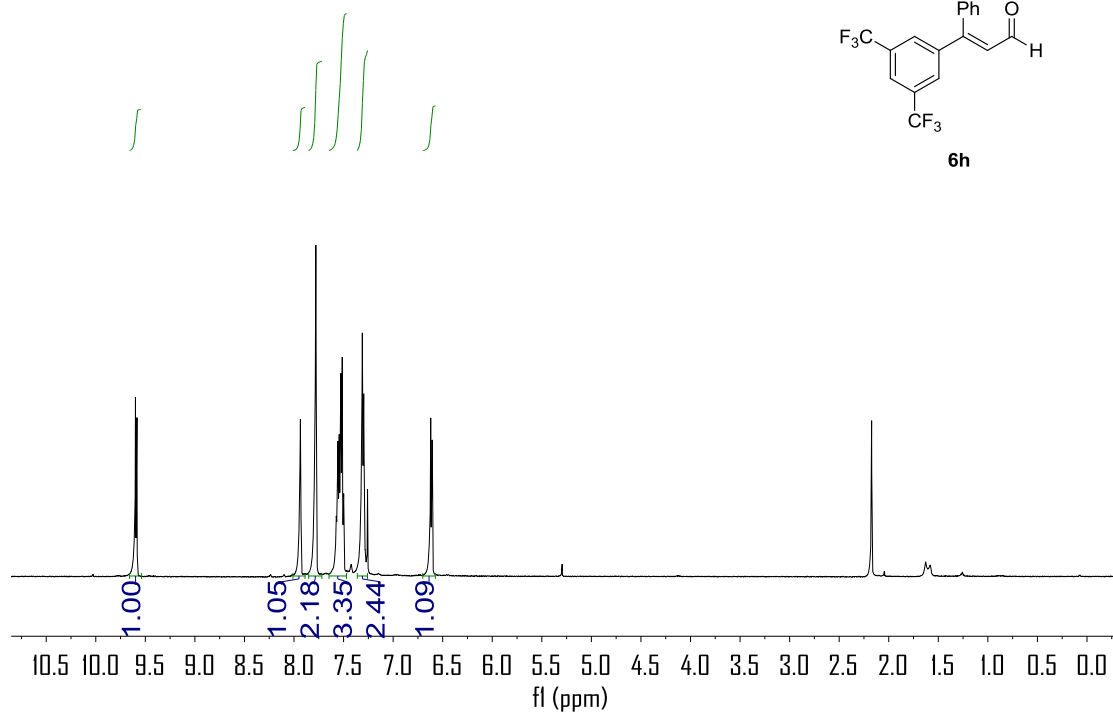

192.5  
158.5  
142.2  
135.0  
132.6  
132.3  
132.0  
131.8  
130.6  
130.3  
129.3  
128.9  
128.4  
126.2  
124.0  
123.6  
121.8  
119.7

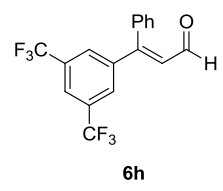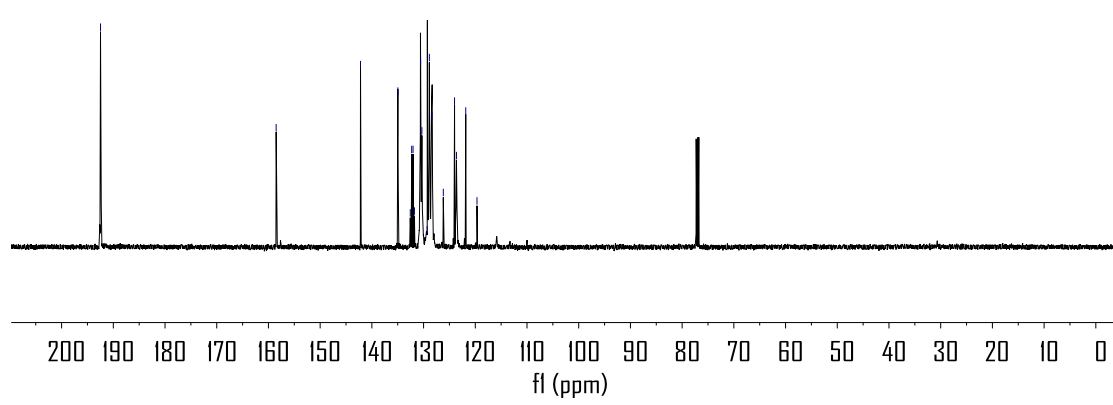

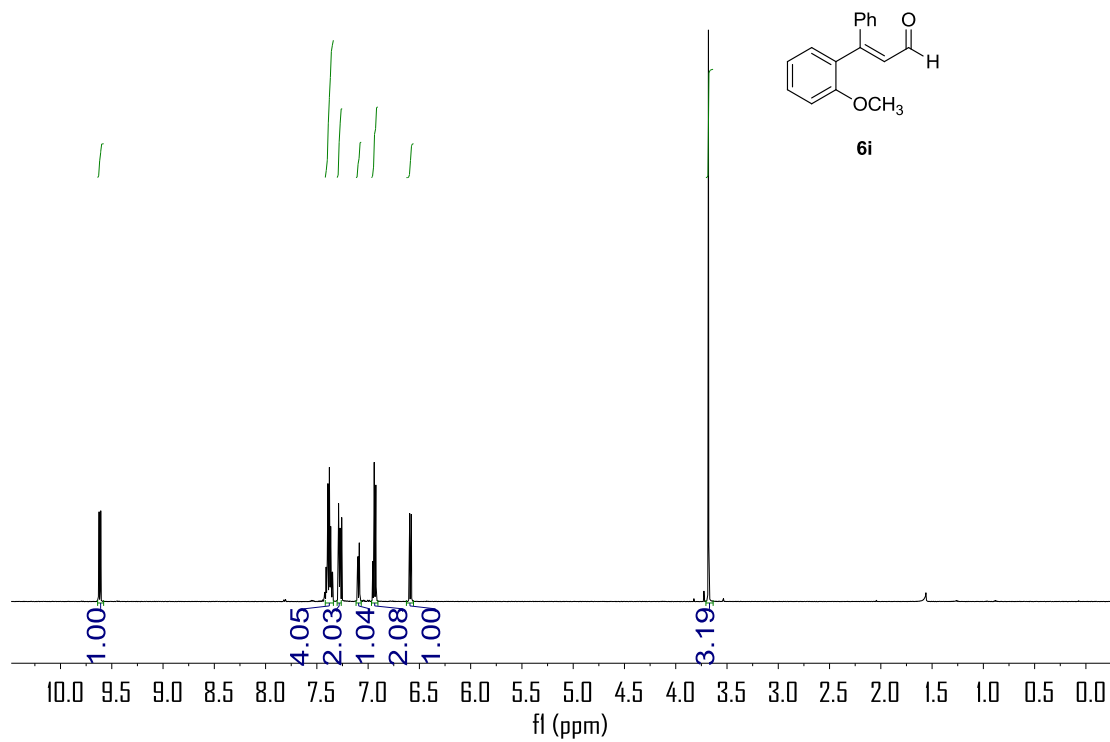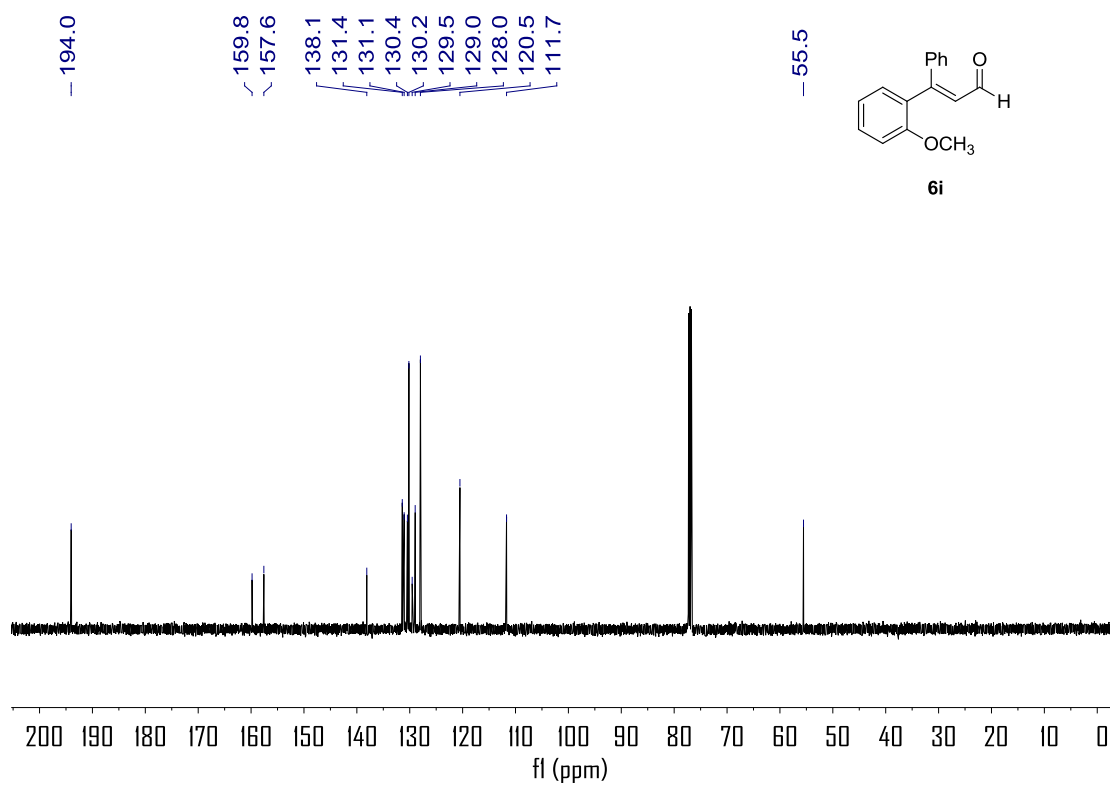



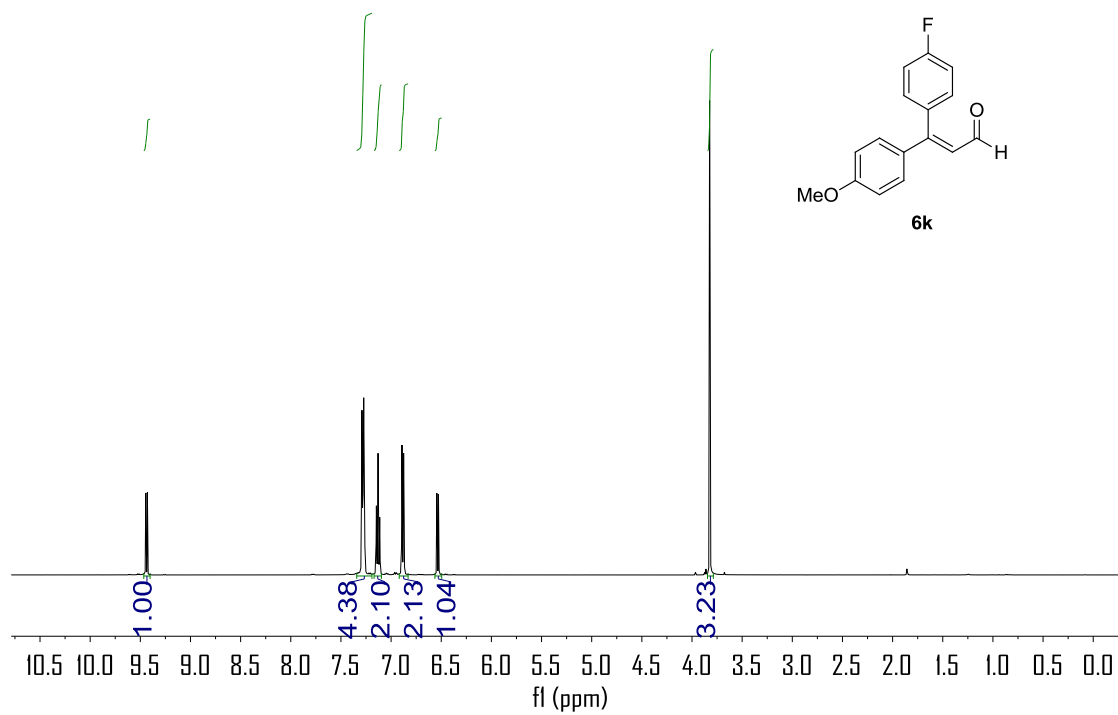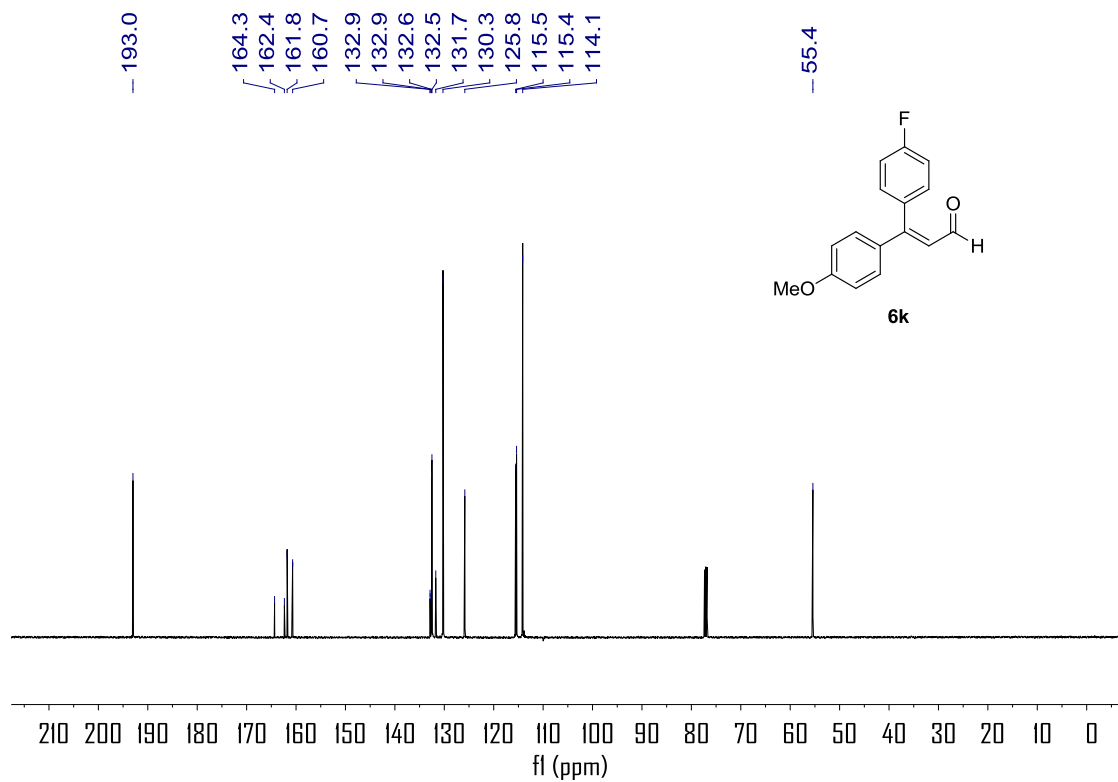

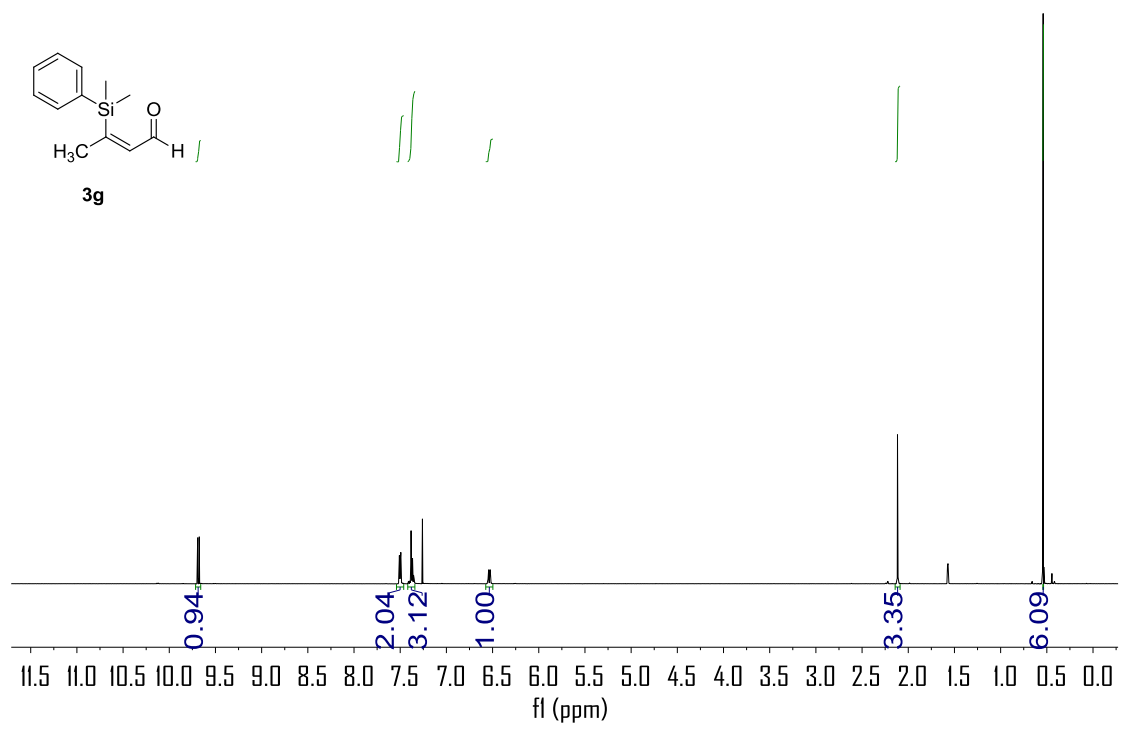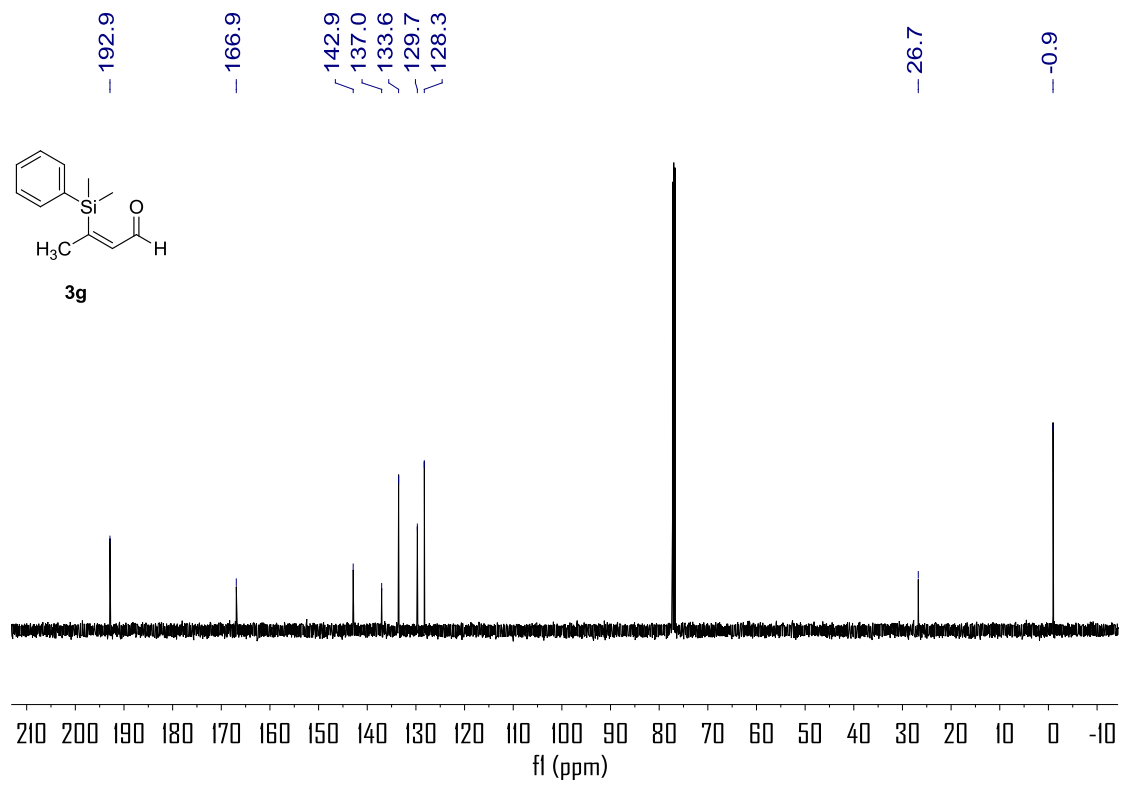

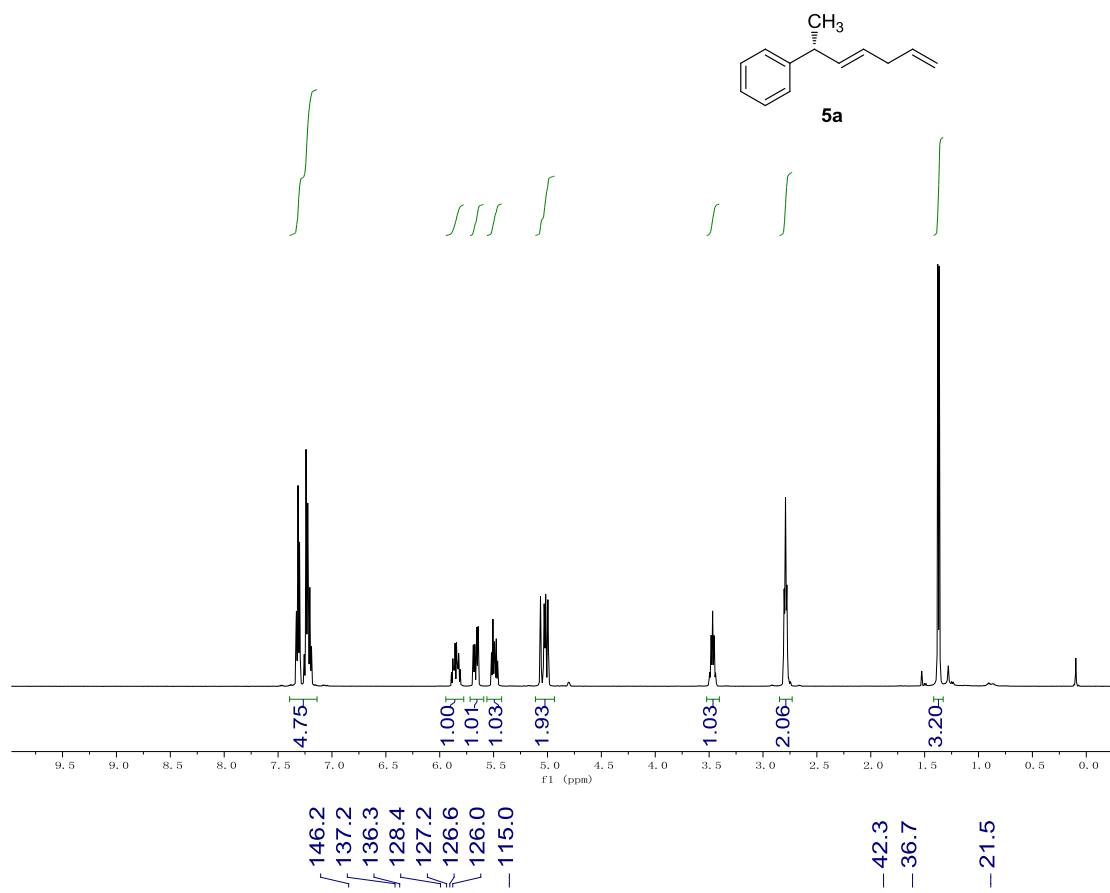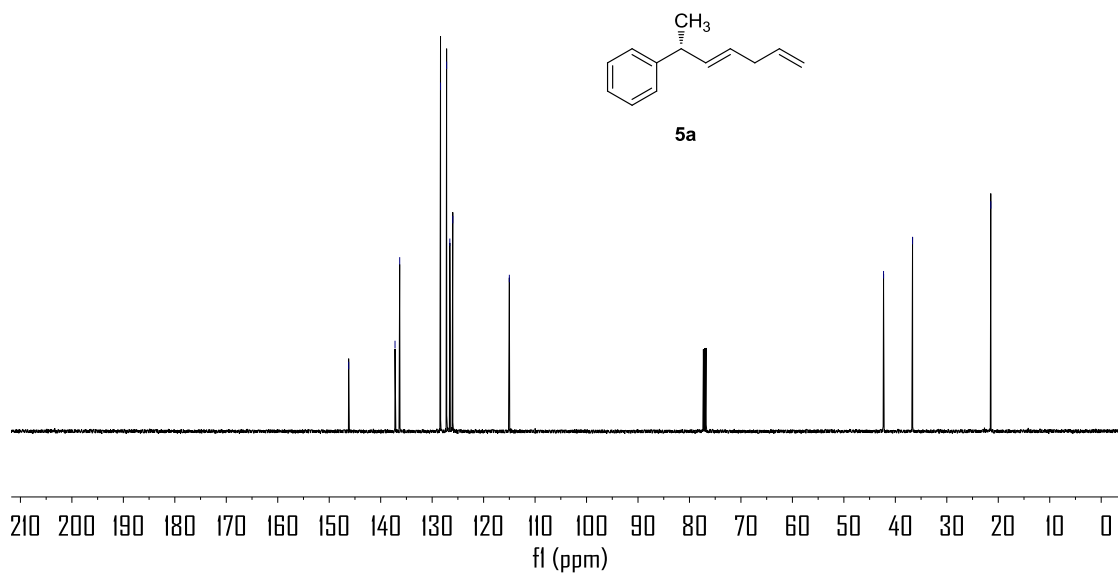

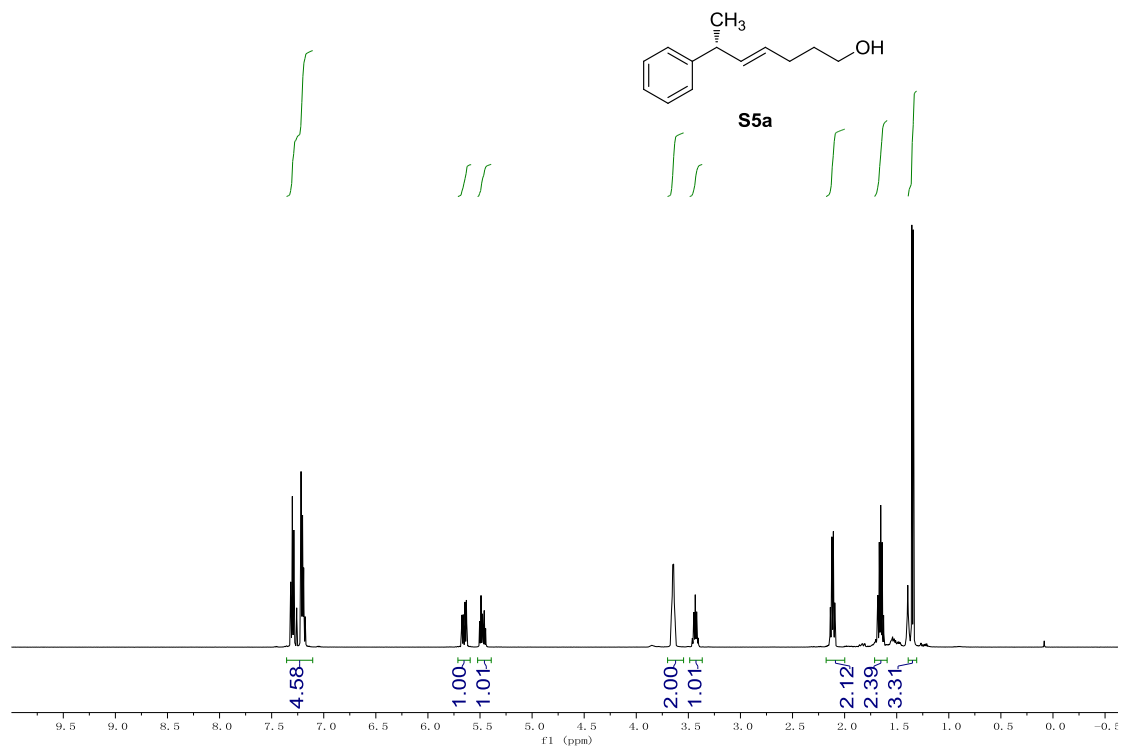

- 146.2
- 135.7
- 128.4
- 128.3
- 127.1
- 126.0
  
- 62.5
  
- 42.2
- 32.4
- 28.8
- 21.5

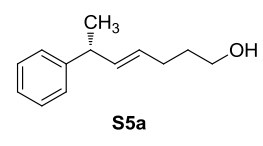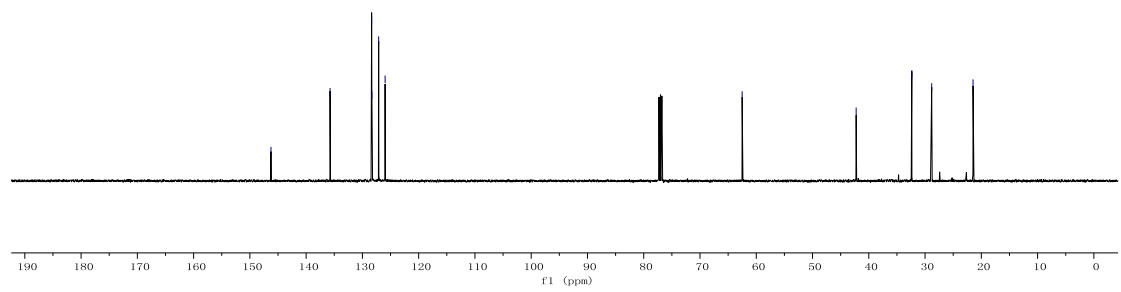

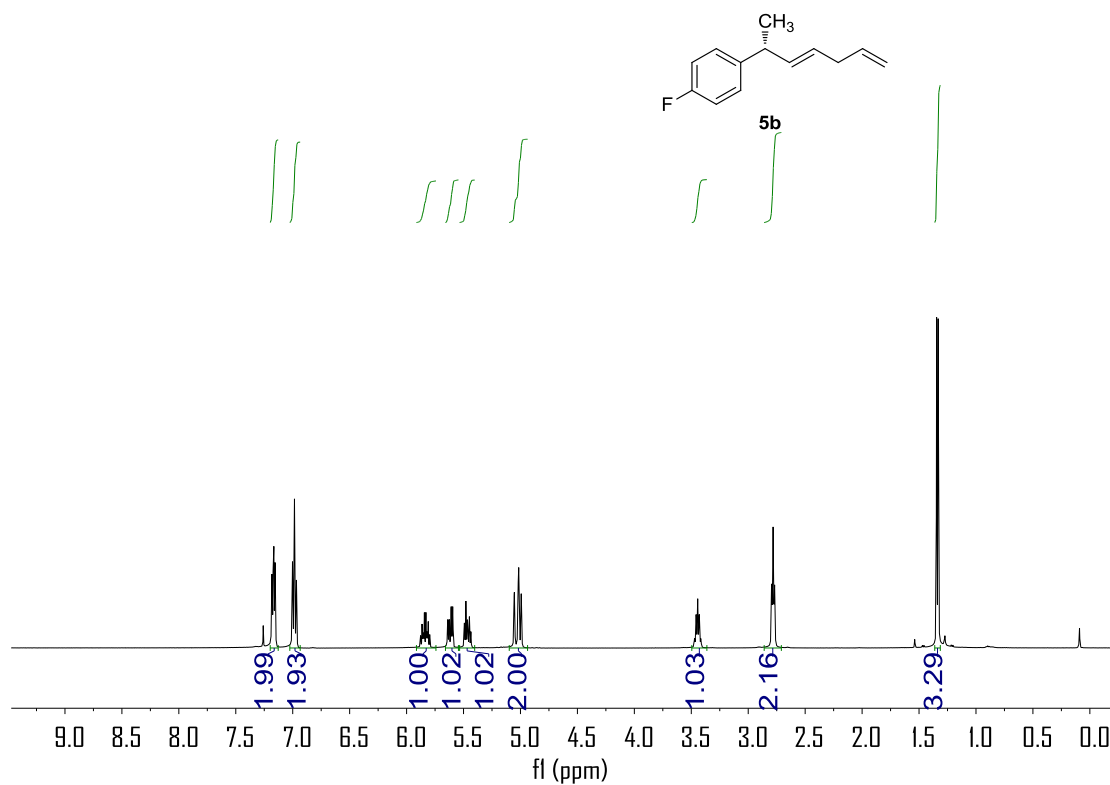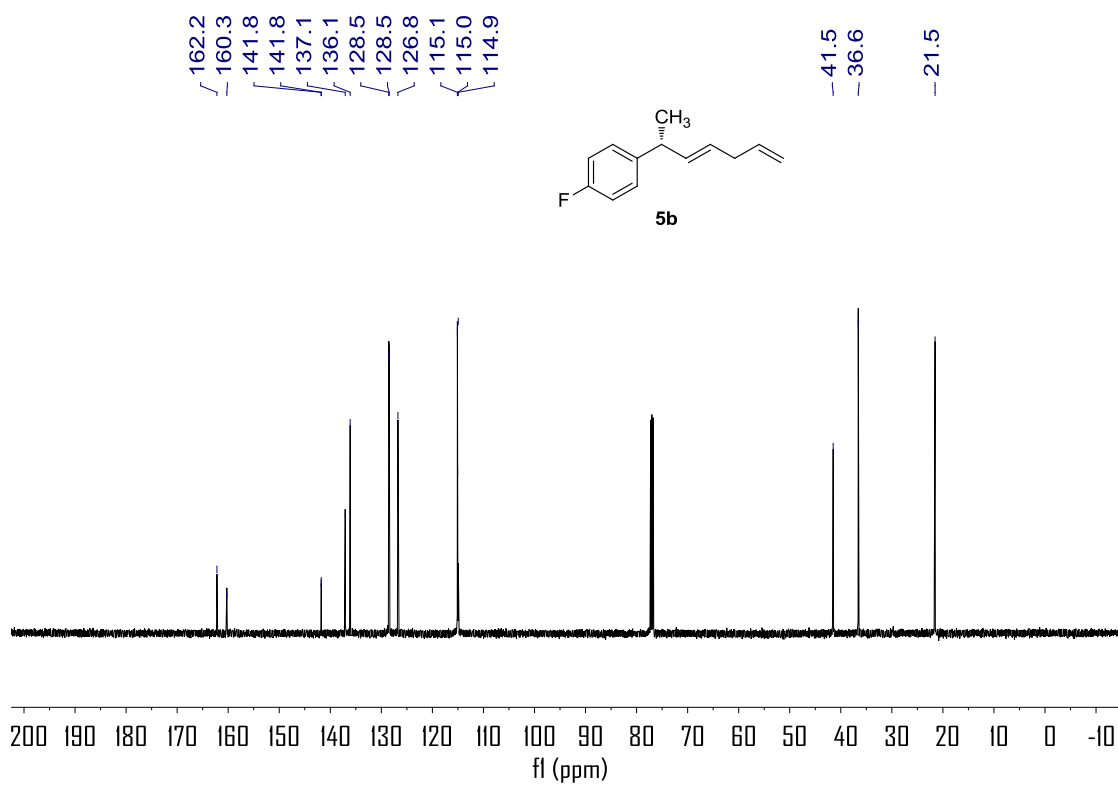

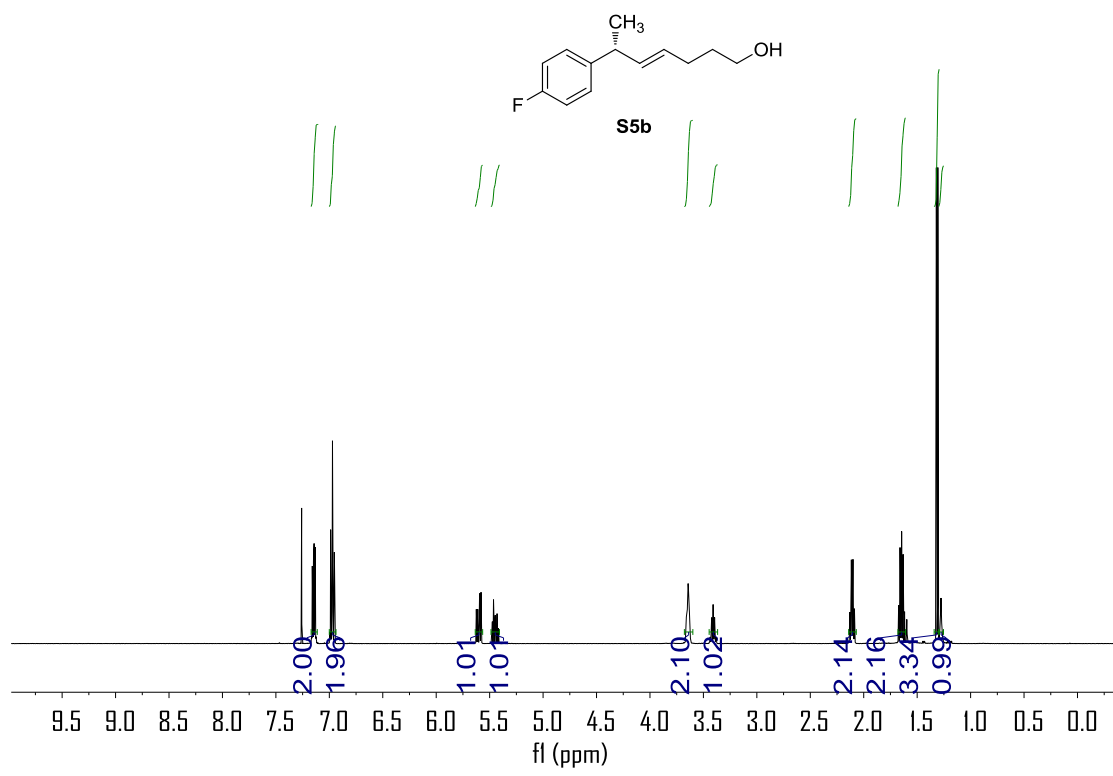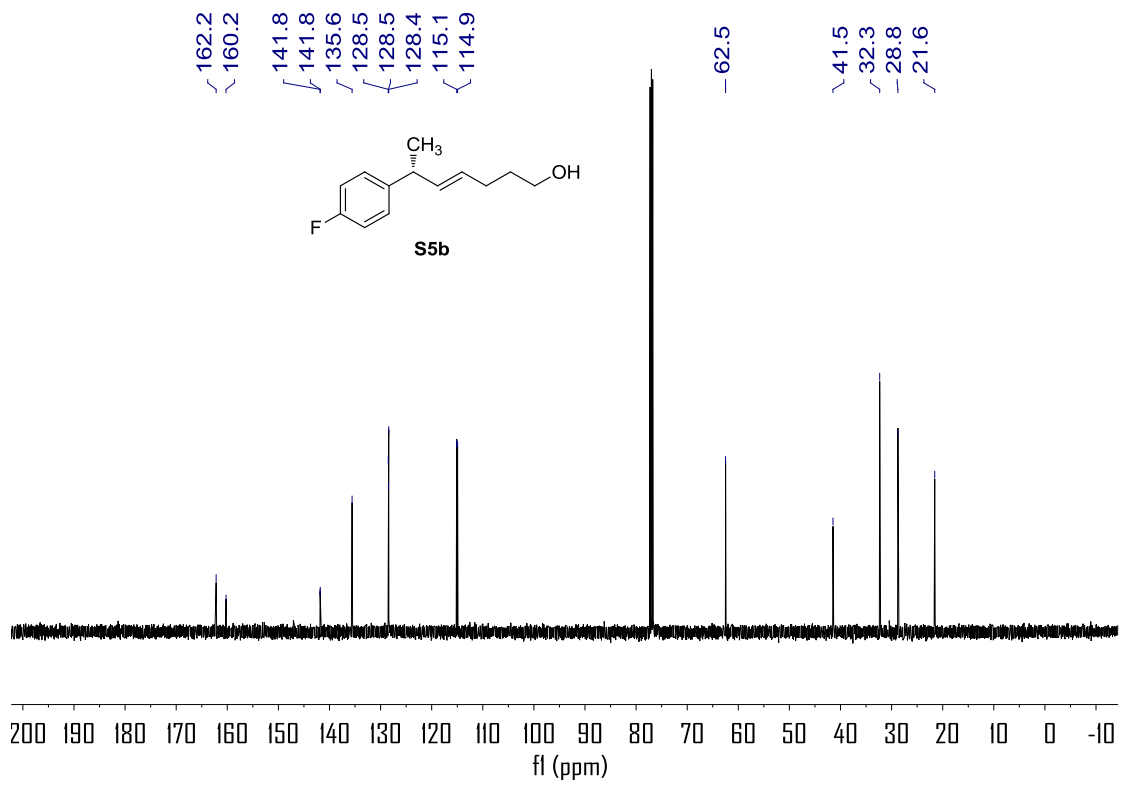

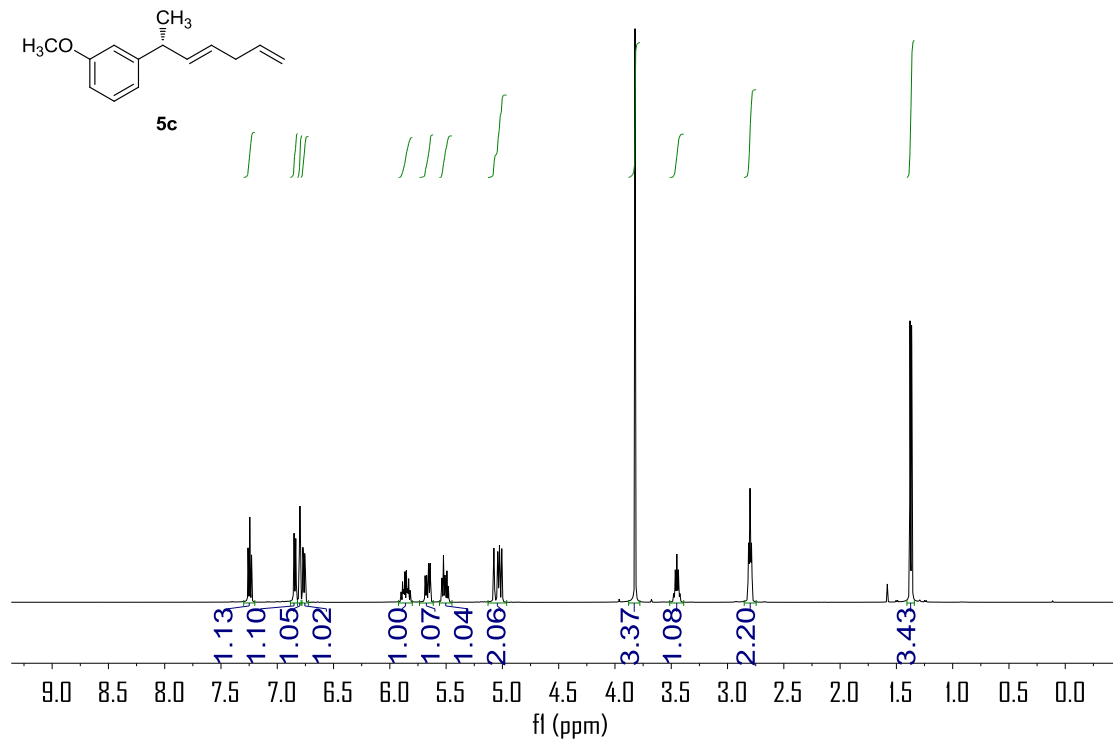

- 159.6
- 148.0
- 137.2
- 129.3
- 126.6
- 119.6
- 115.0
- 113.2
- 111.0
- 55.1
- 42.3
- 36.6
- 21.4

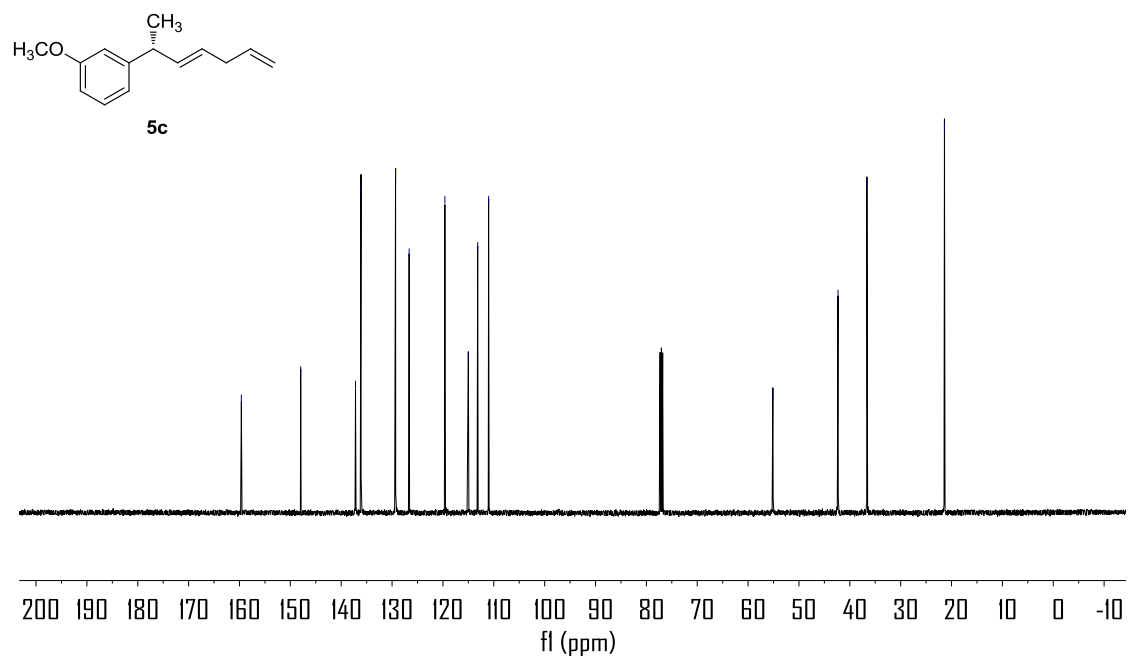

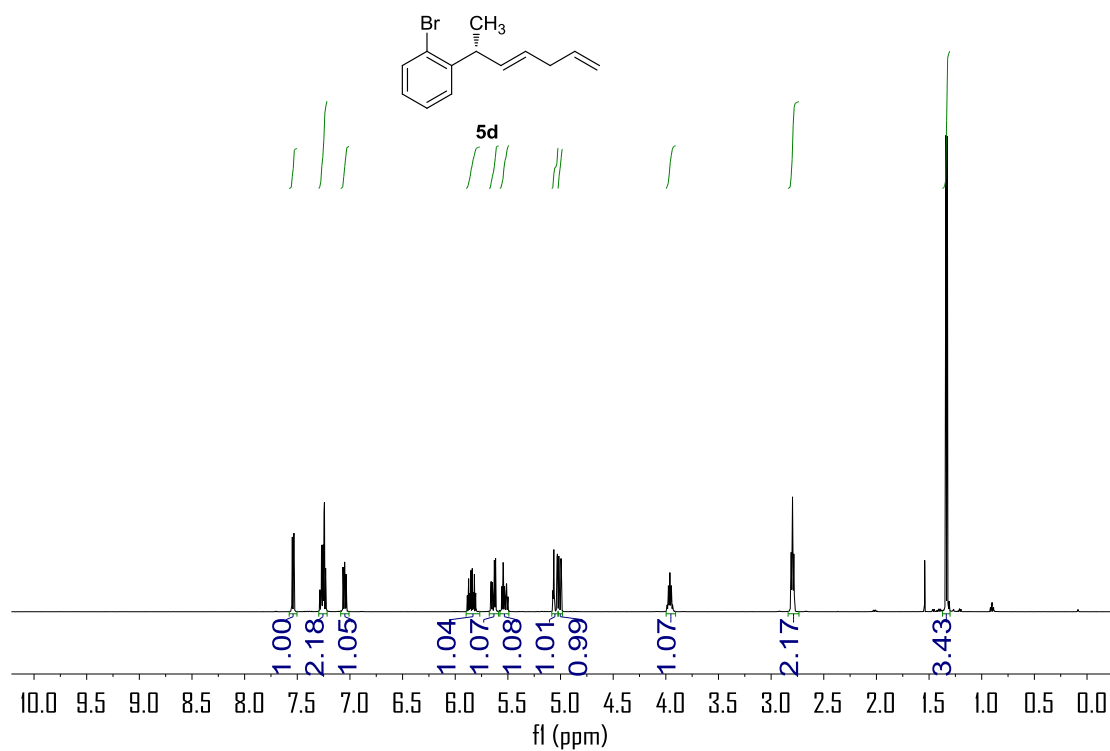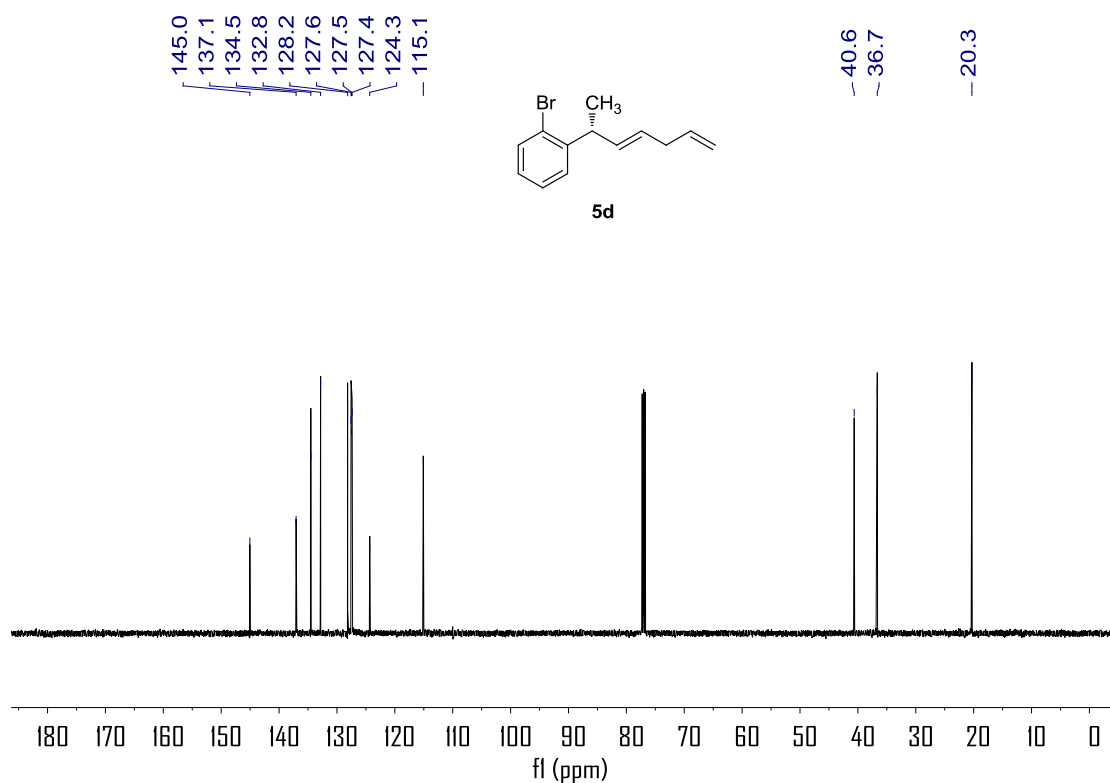



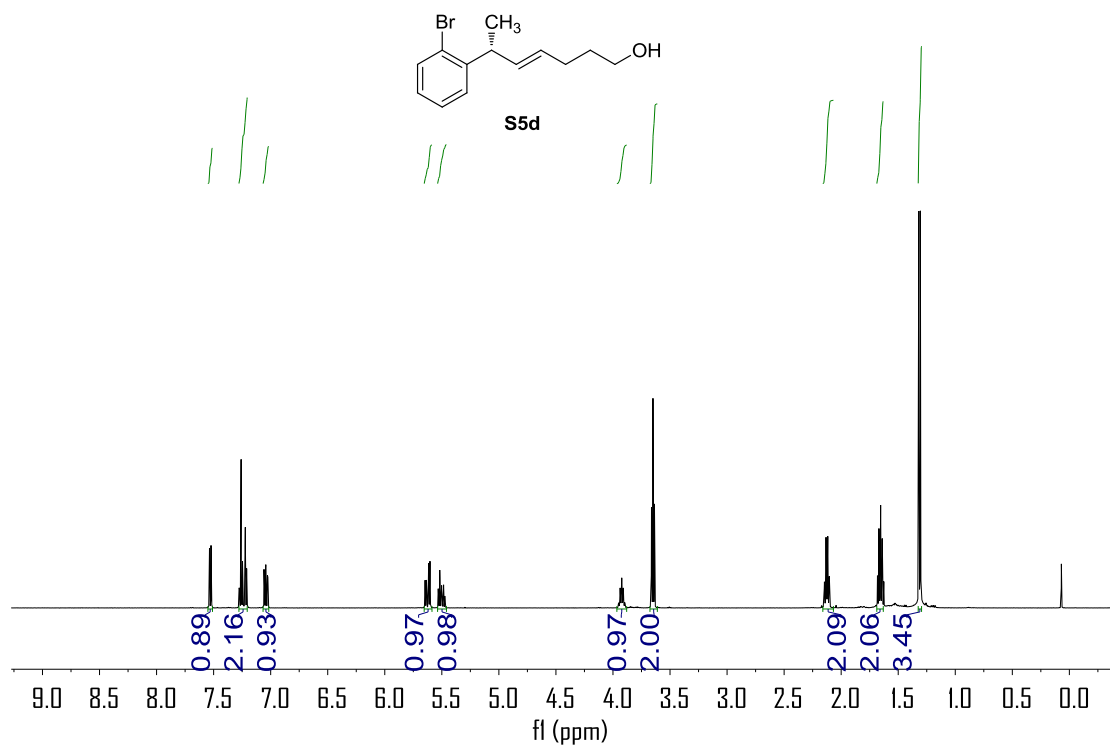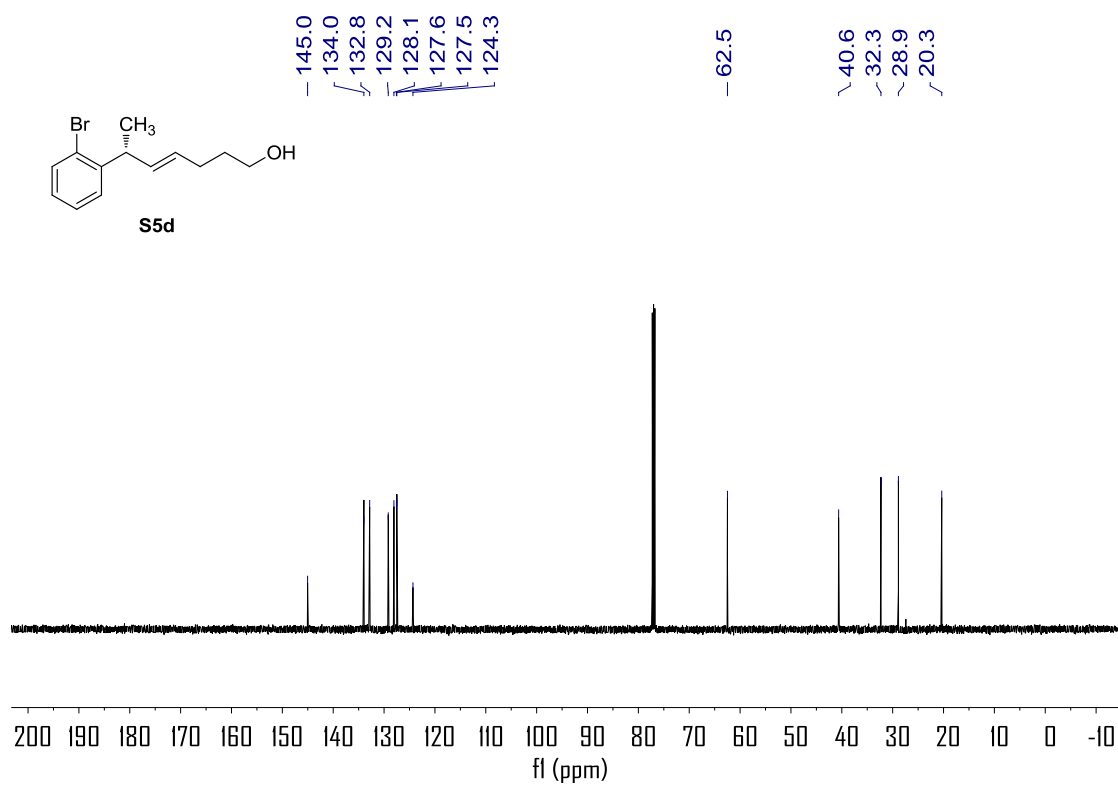

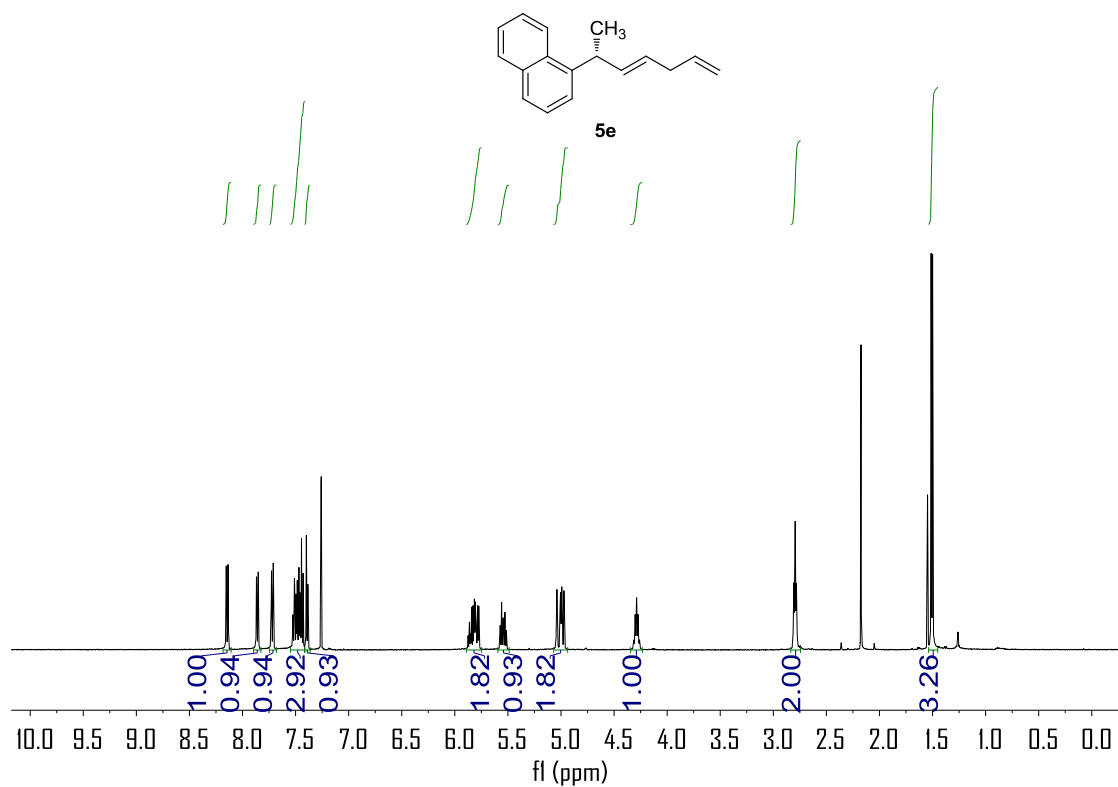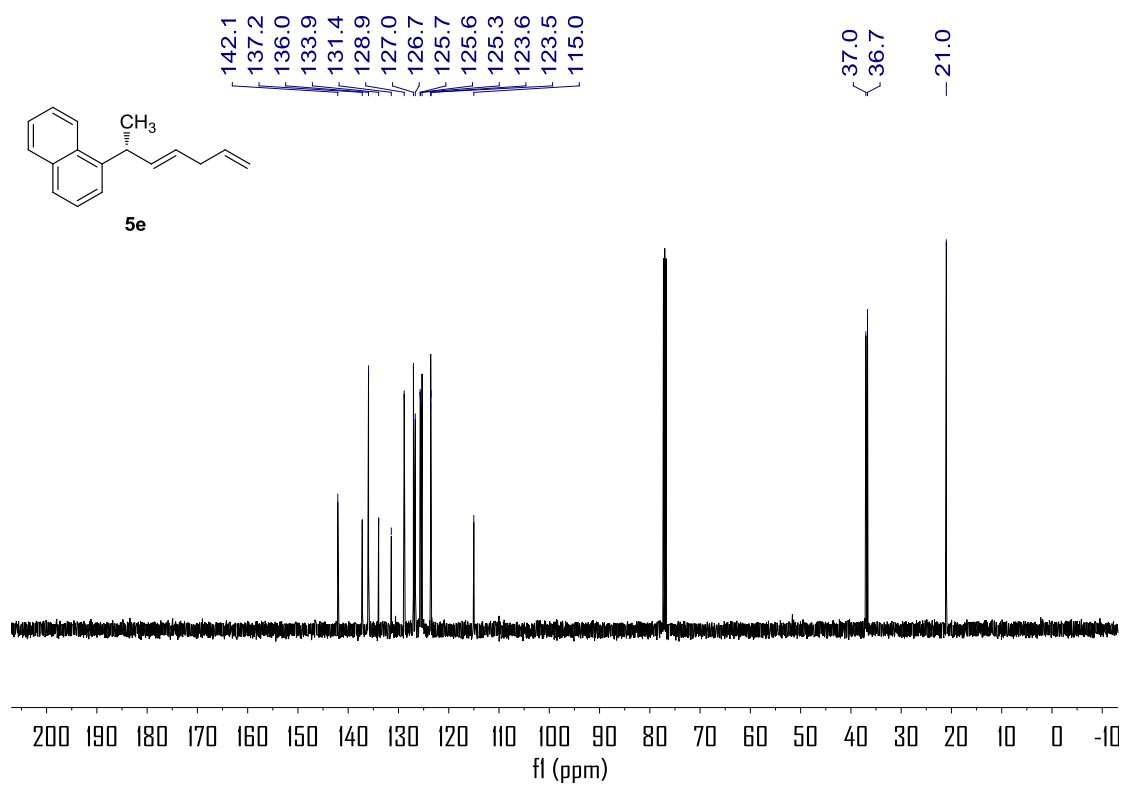

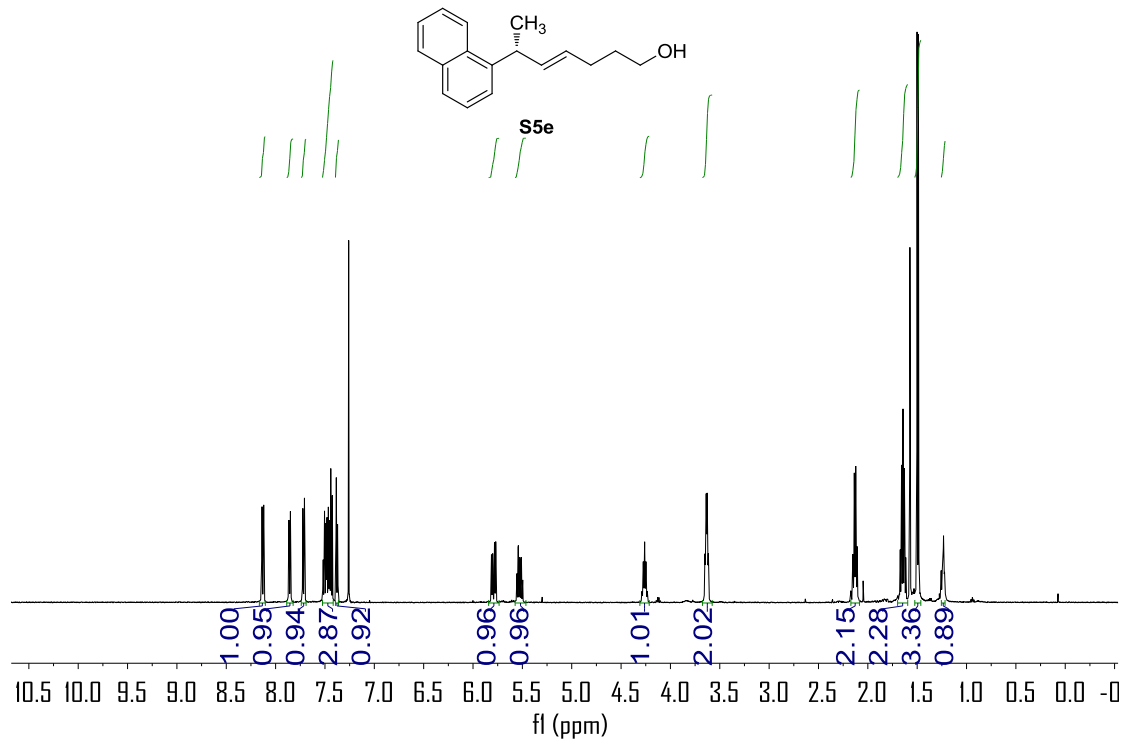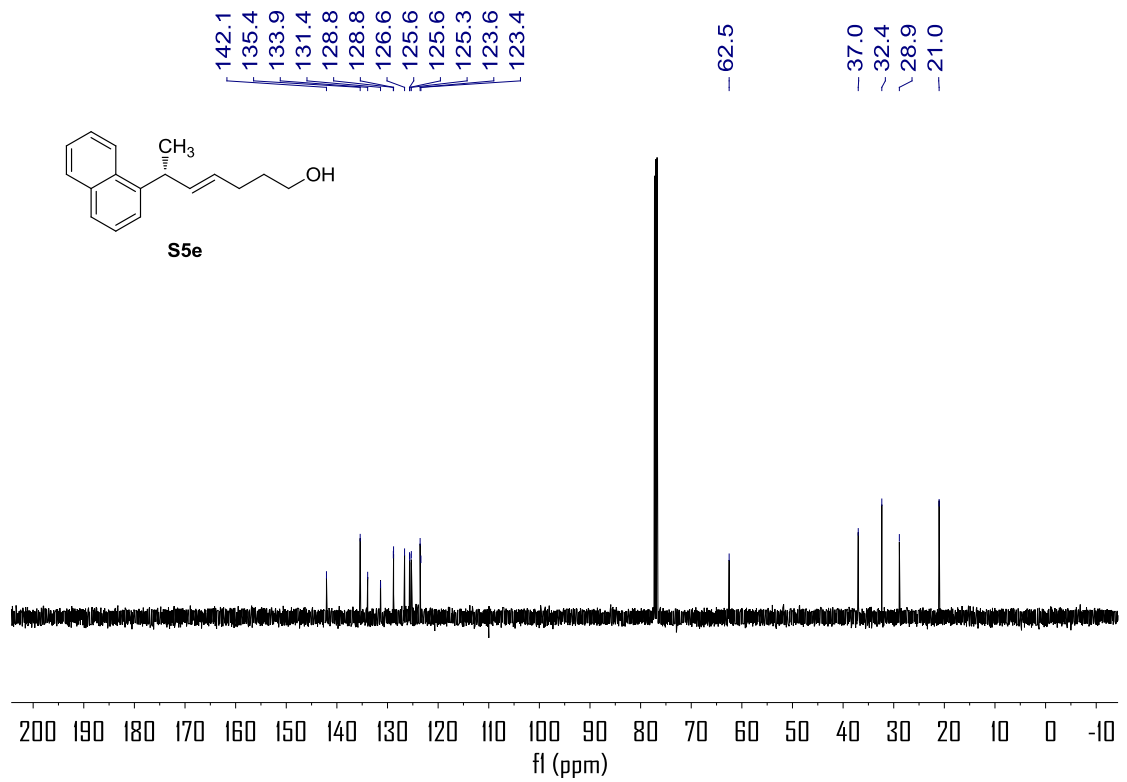

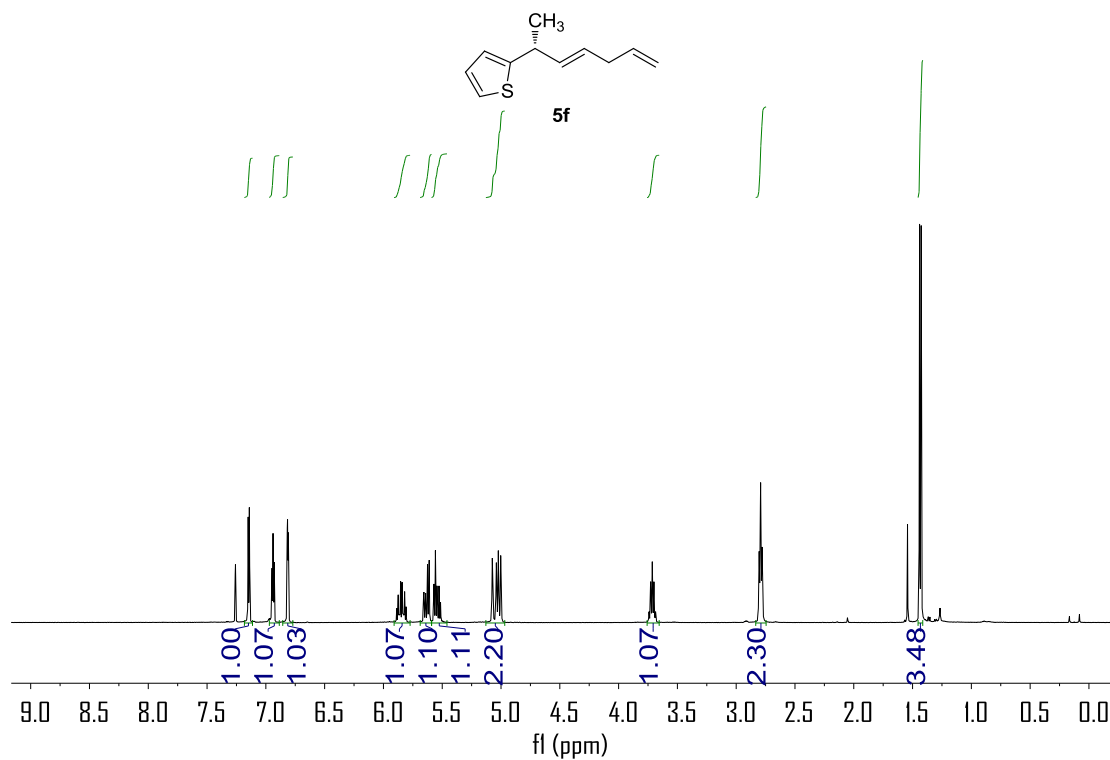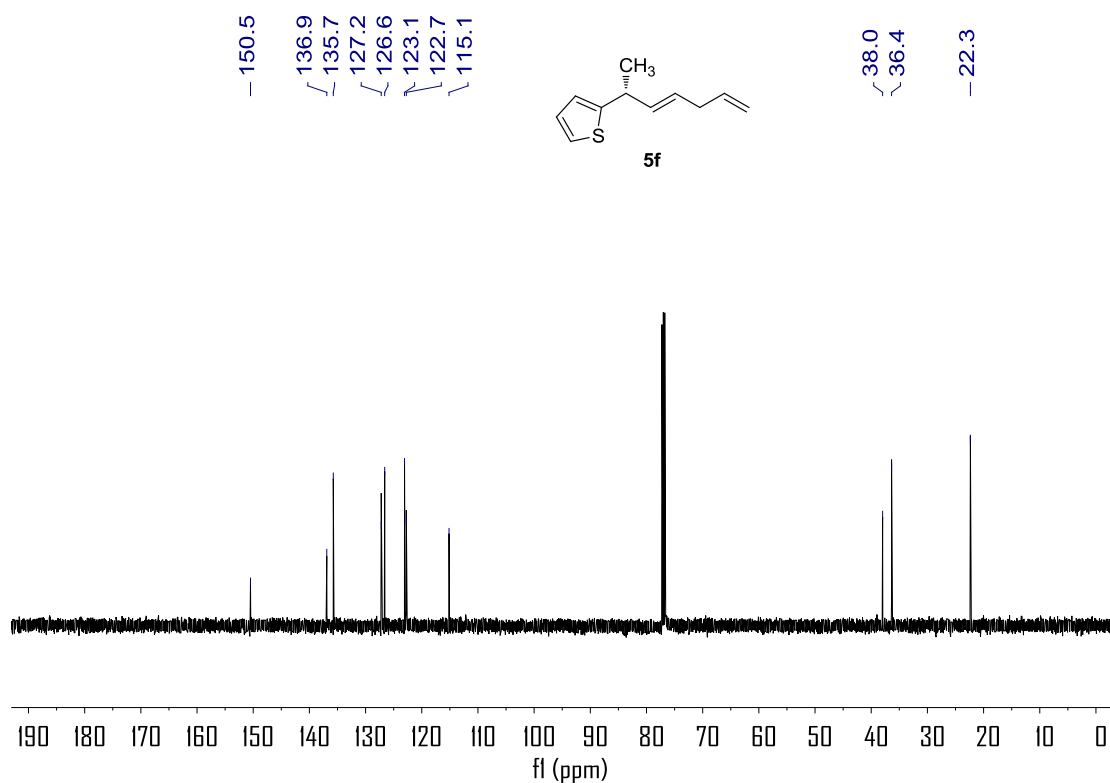

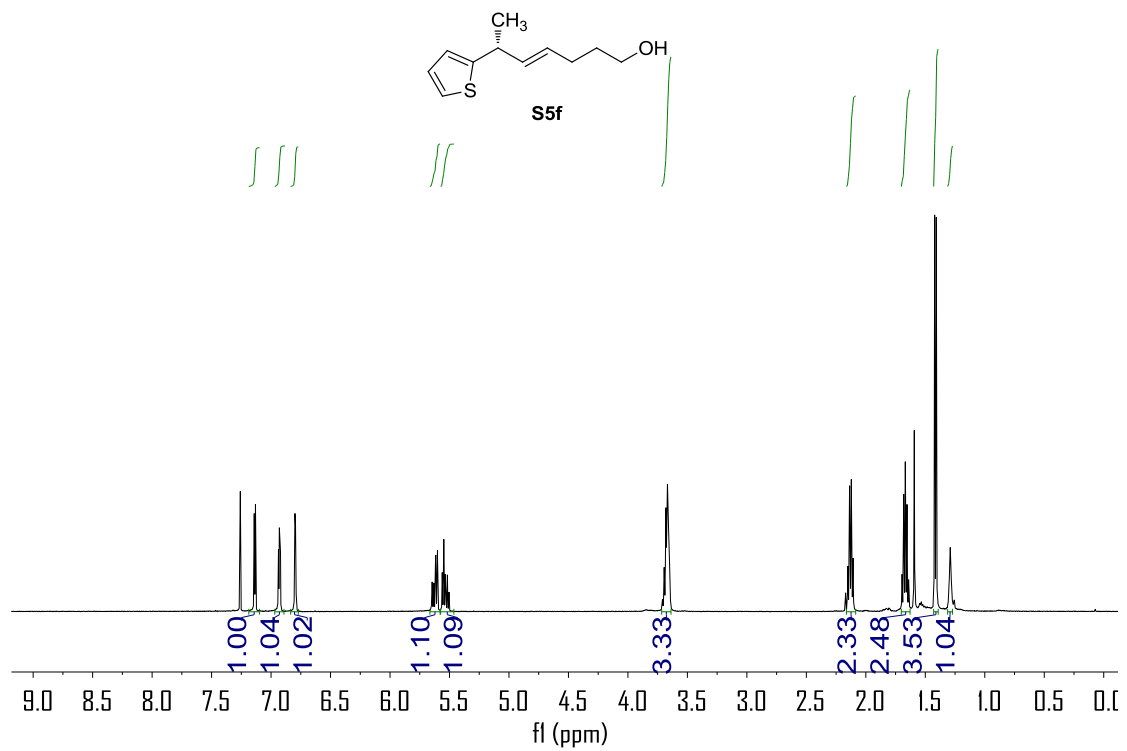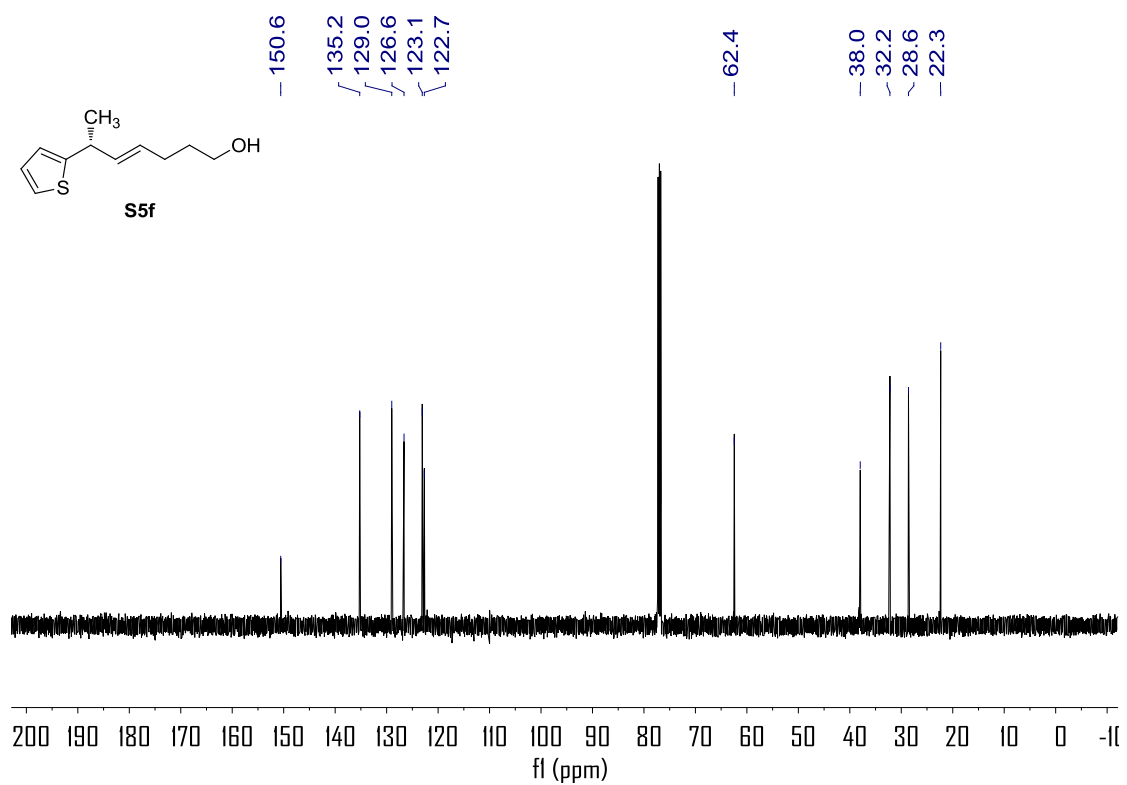

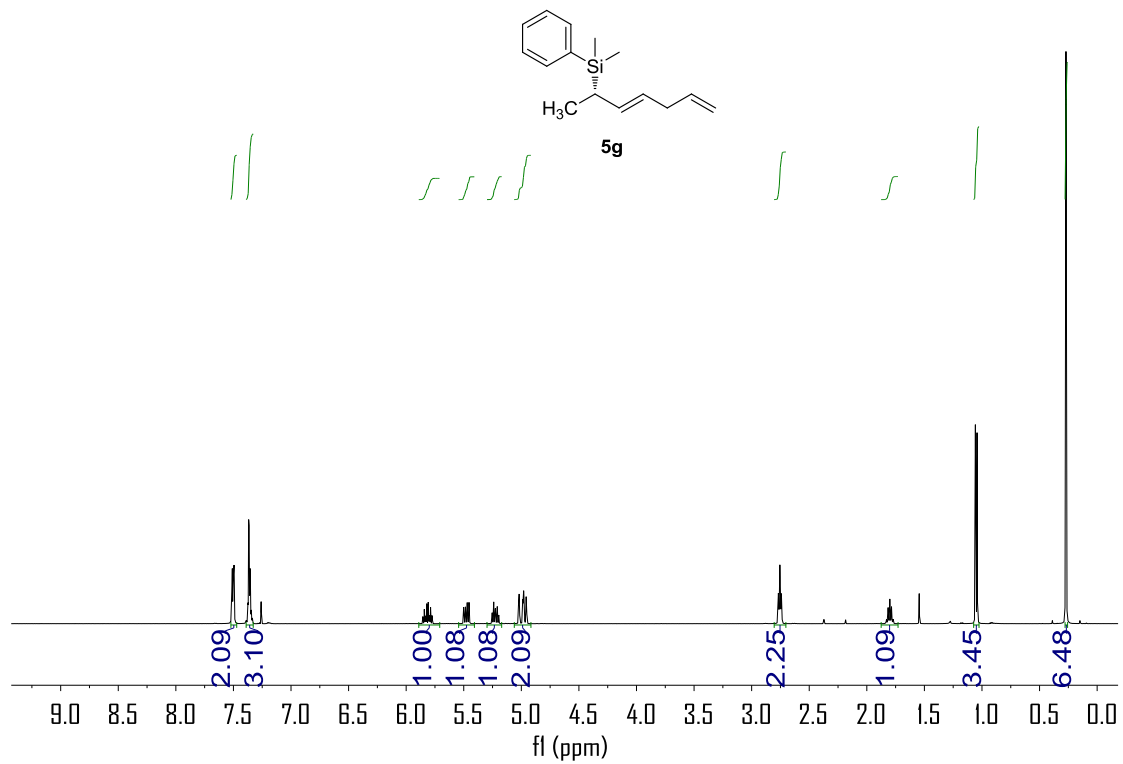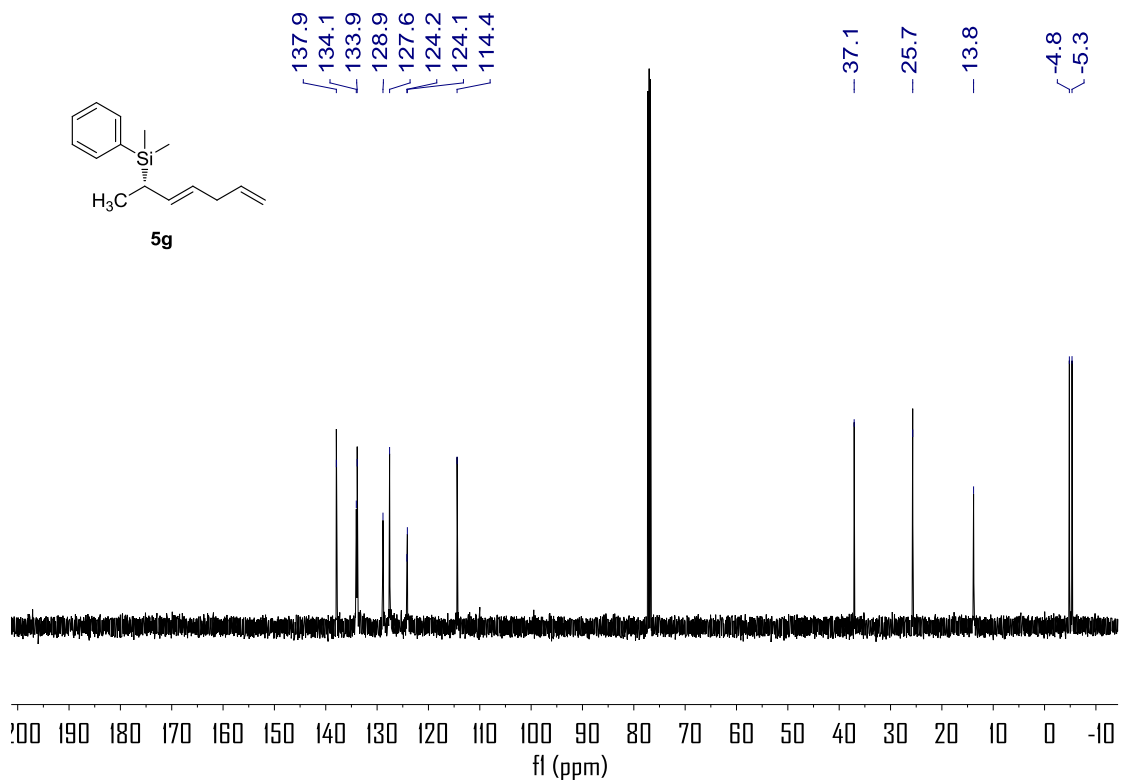

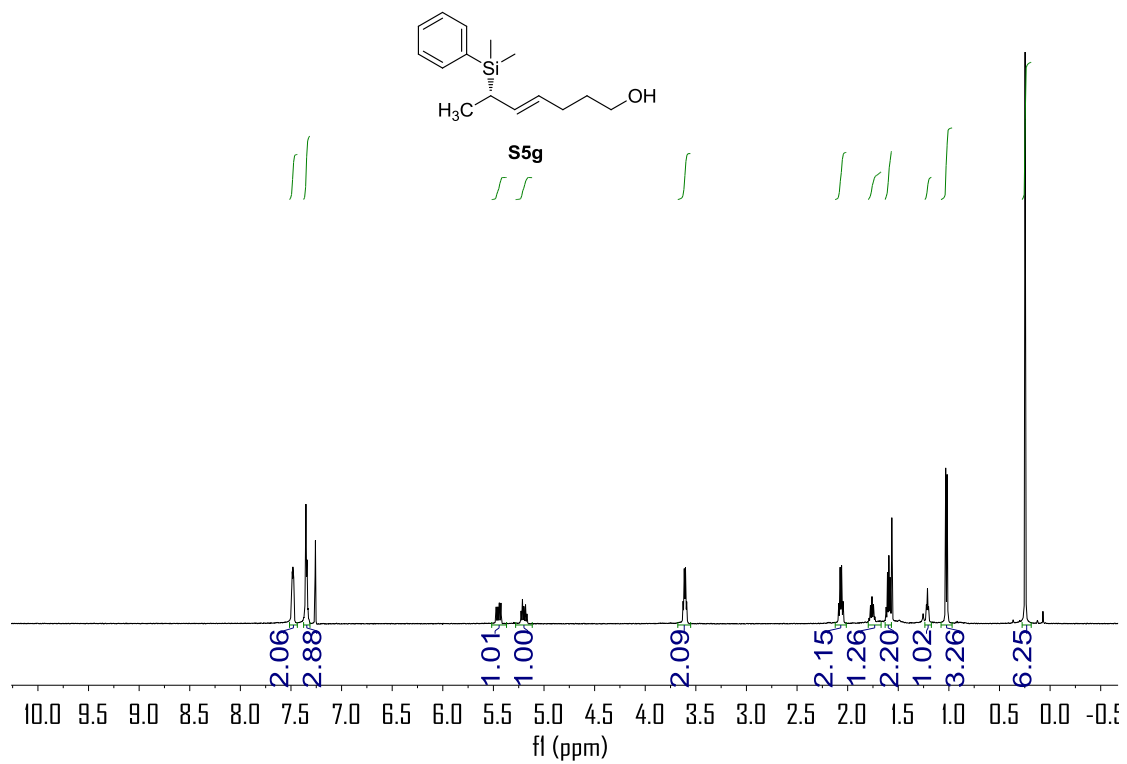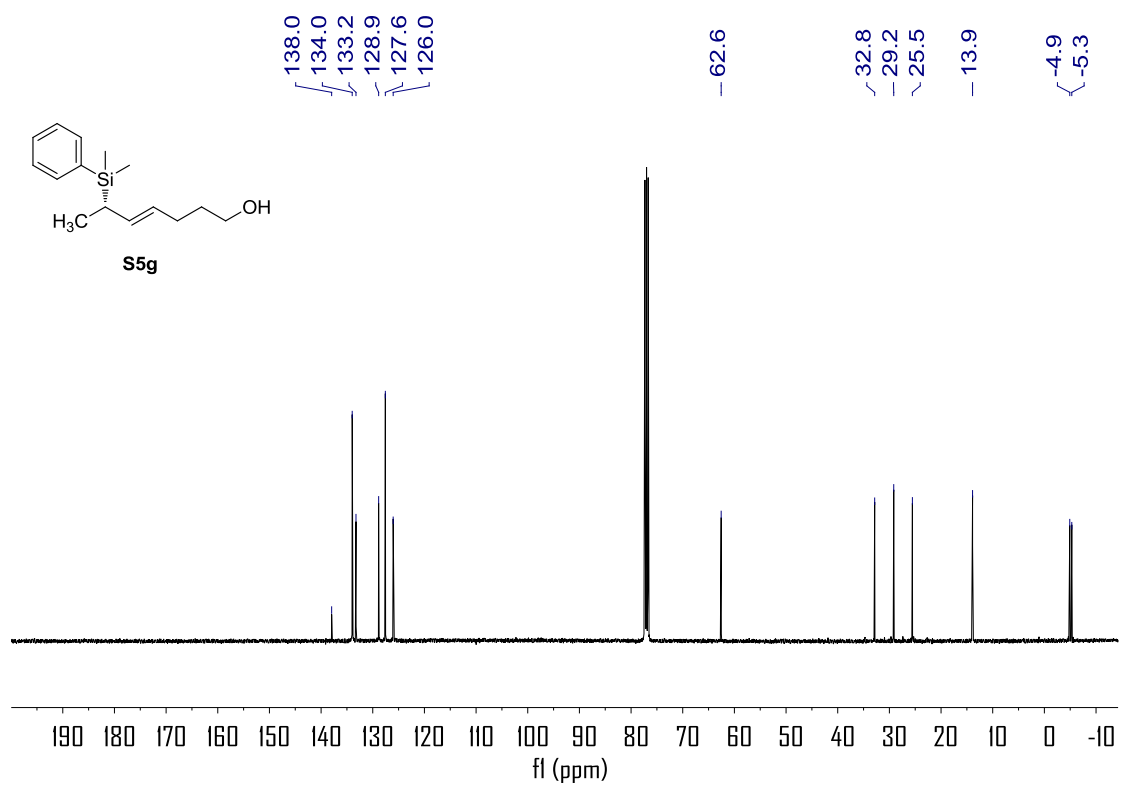

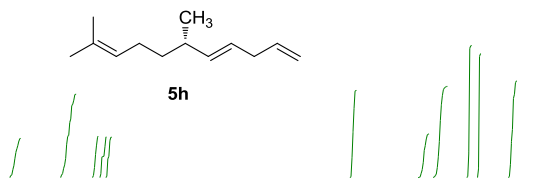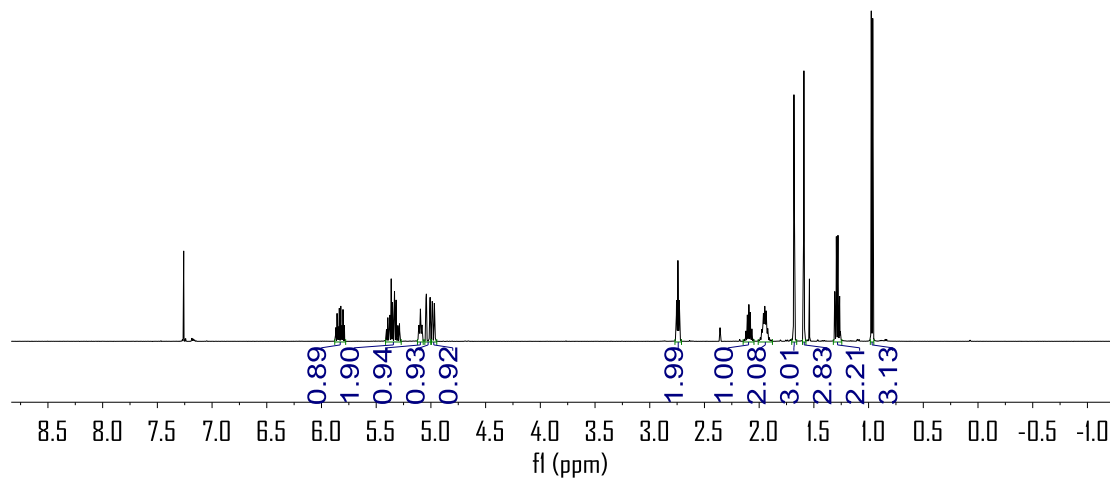

137.6  
 131.1  
 125.9  
 124.8  
 124.7  
 114.7

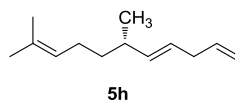

37.2  
 36.7  
 36.3  
 25.8  
 25.7  
 20.7  
 17.7

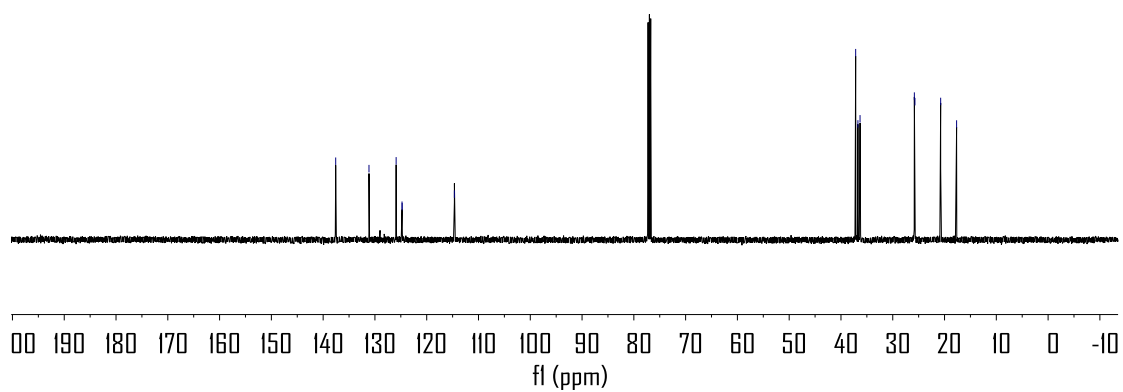



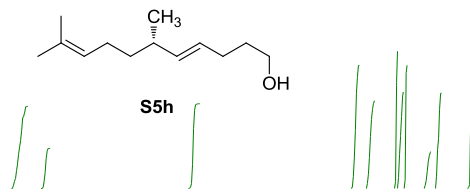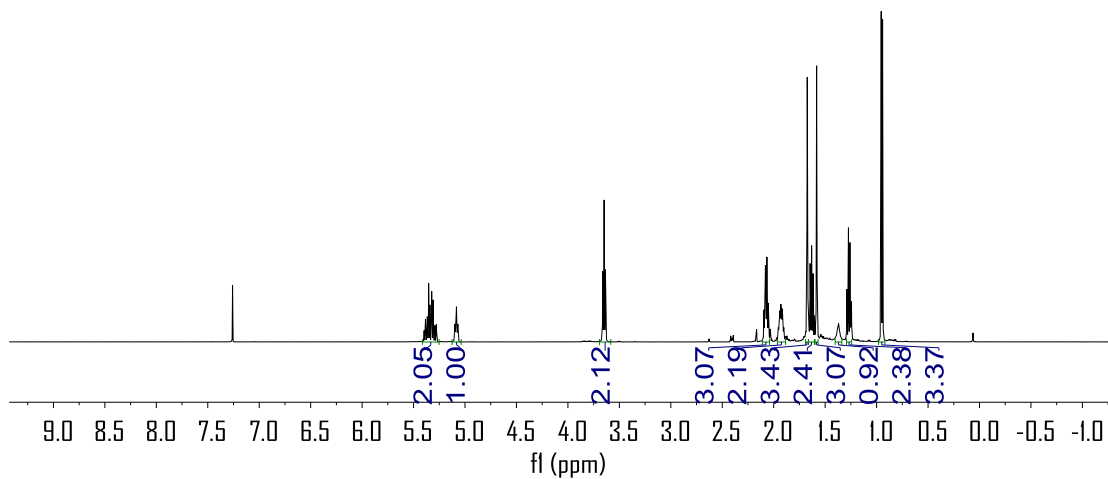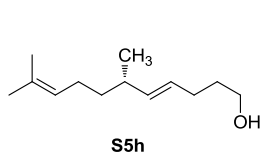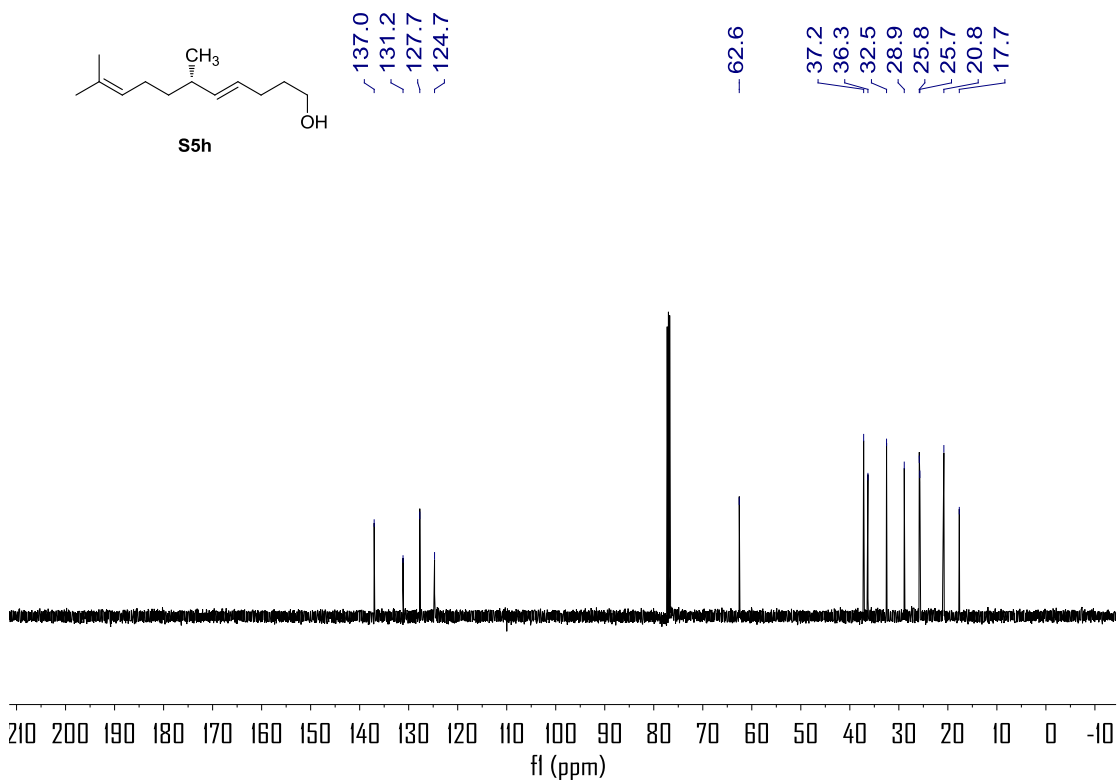

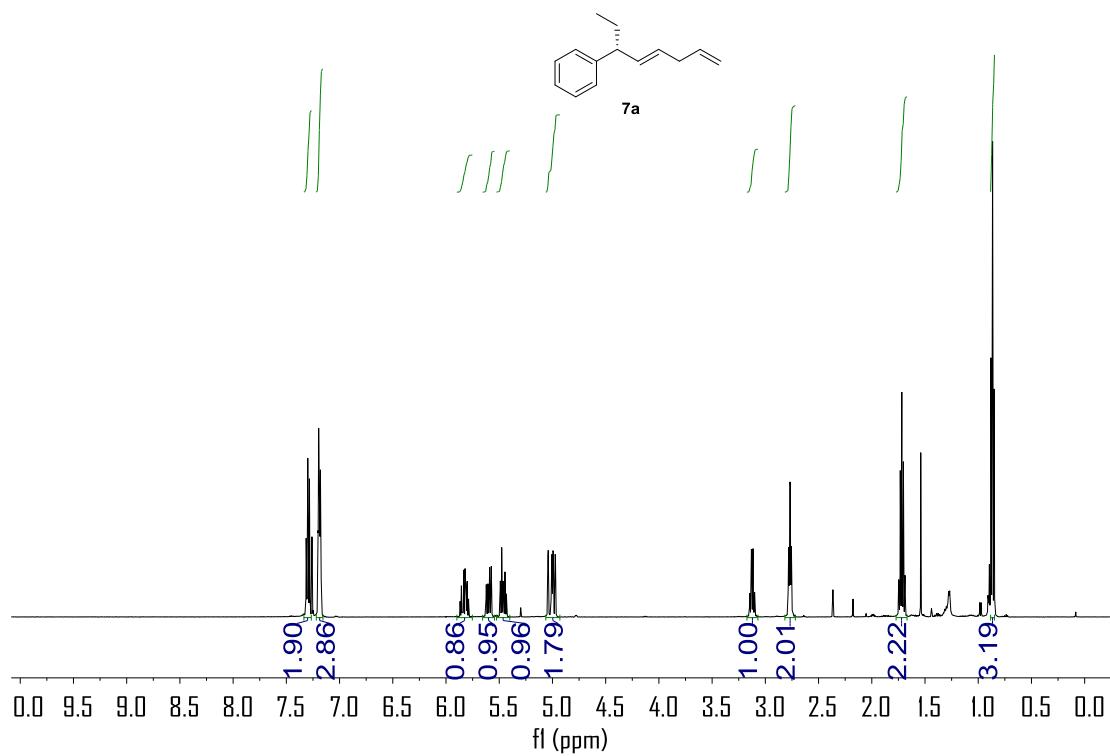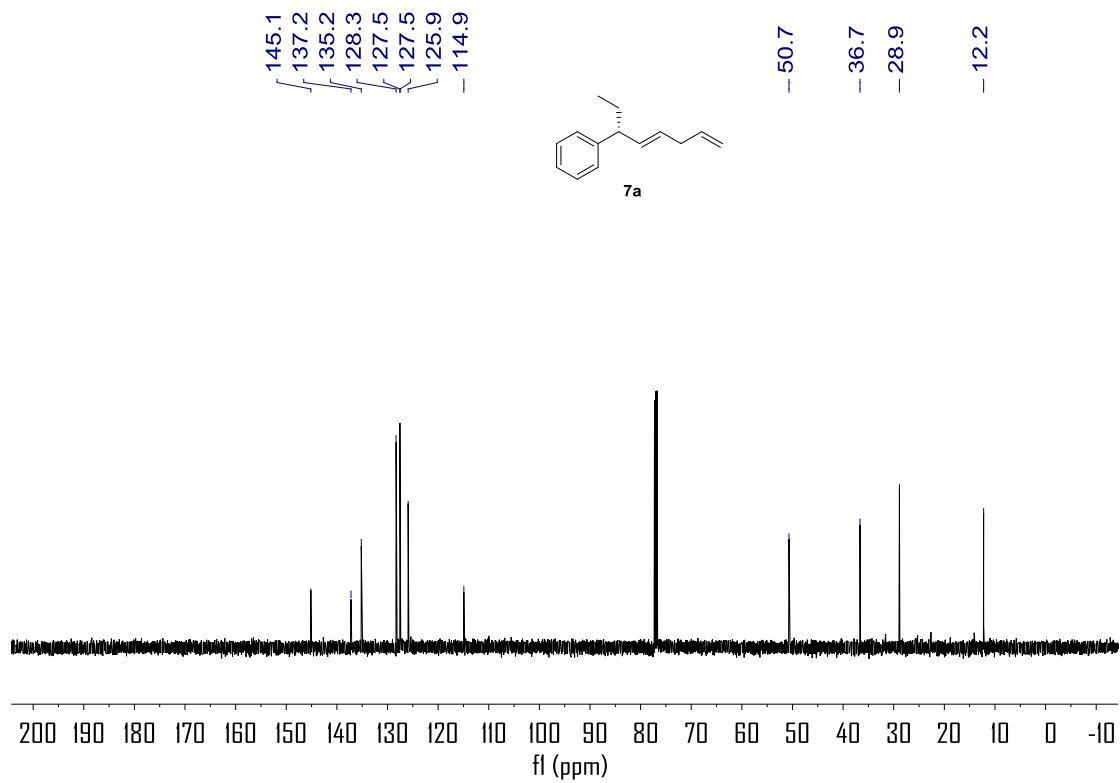

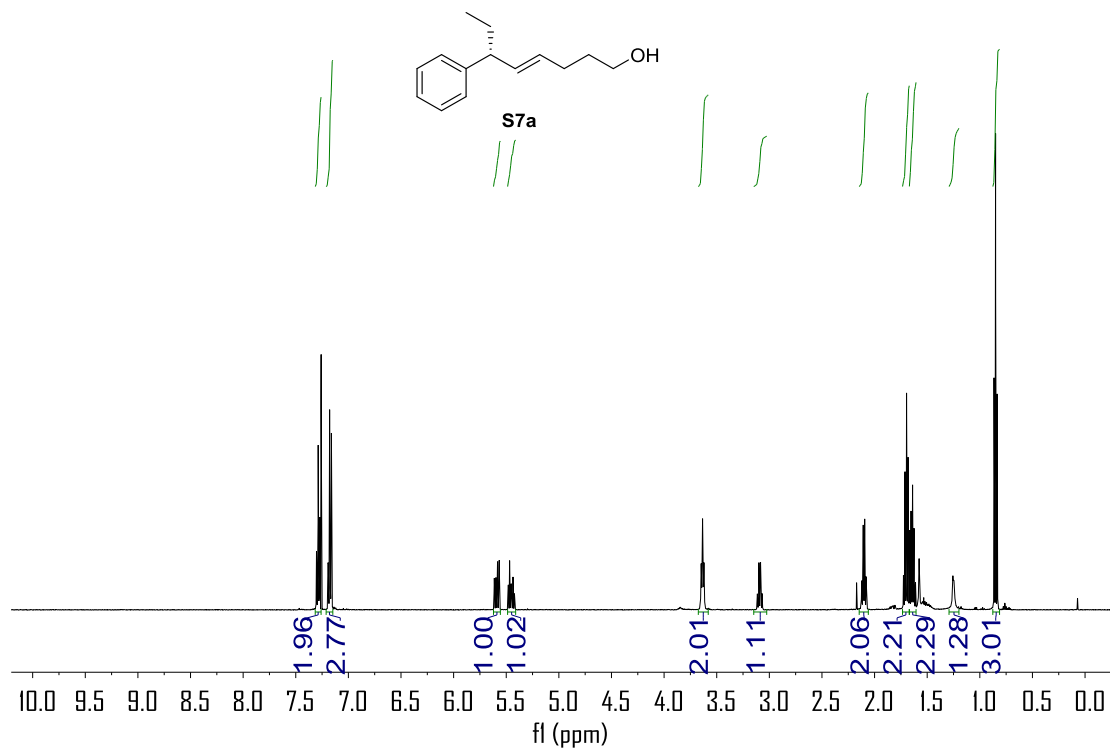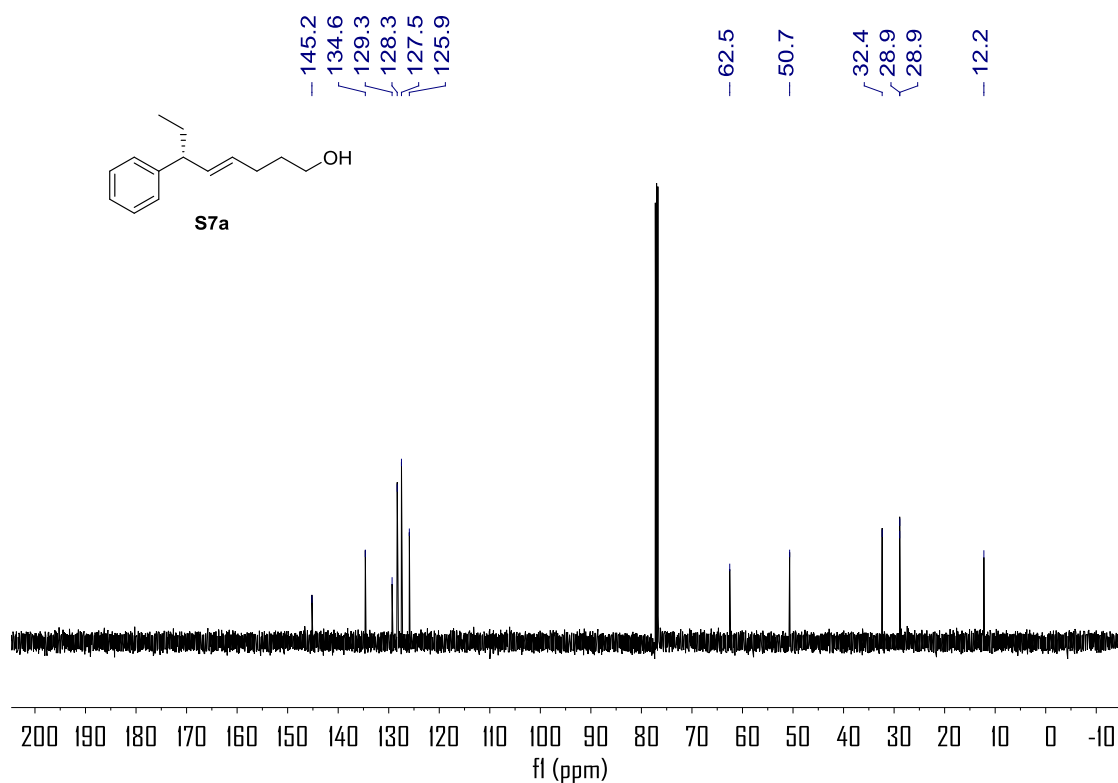

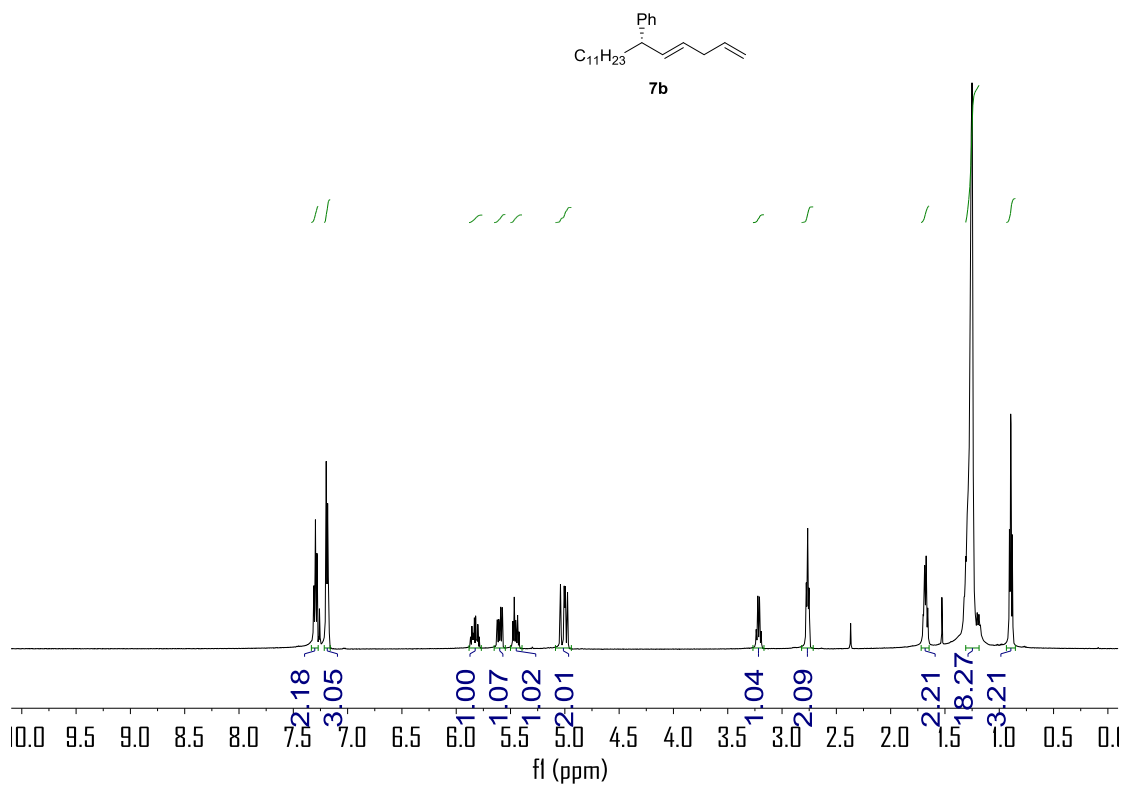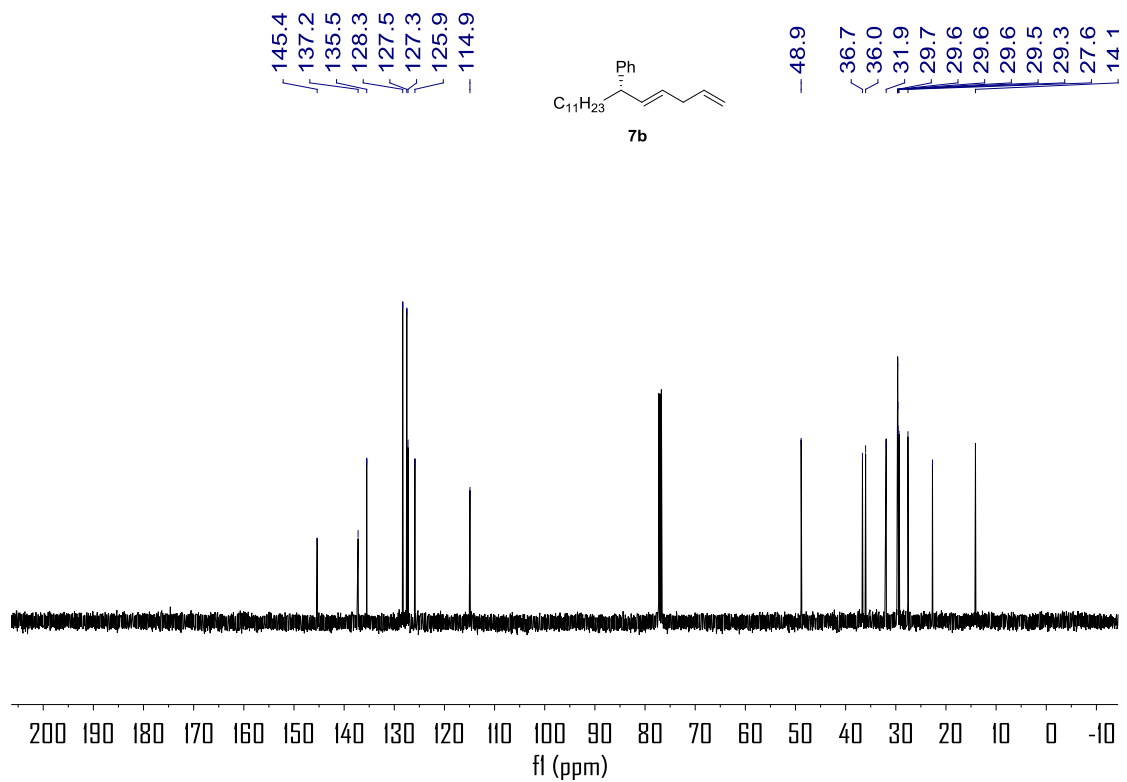

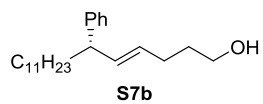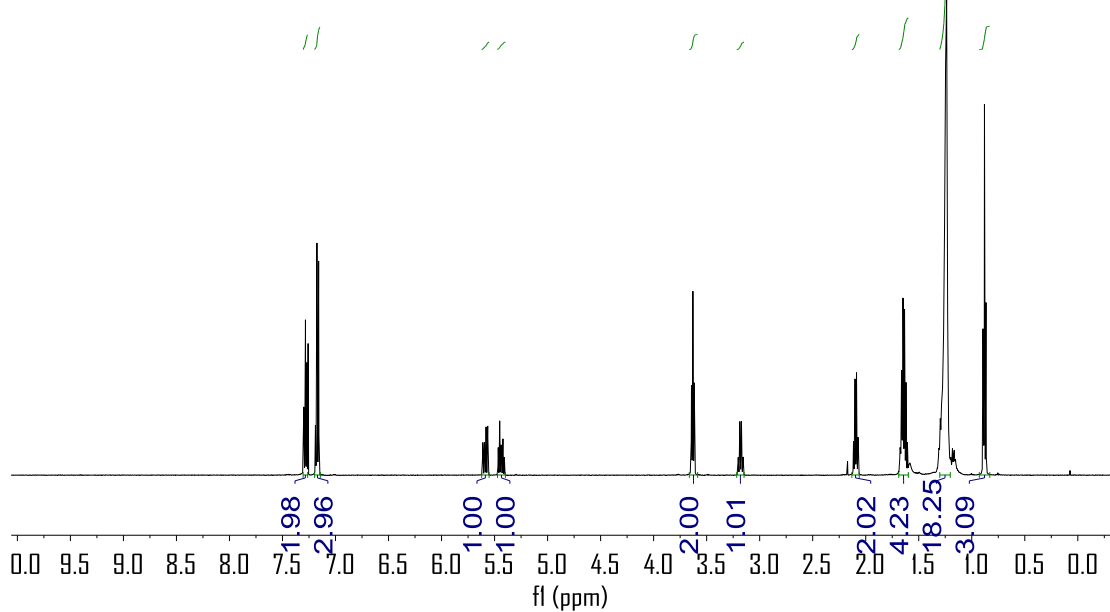

145.4  
 134.9  
 129.1  
 128.3  
 127.4  
 125.9

- 62.5  
 - 48.9  
 36.0  
 32.4  
 29.6  
 29.6  
 29.6  
 29.5  
 29.3  
 28.9  
 27.6  
 22.7  
 14.1

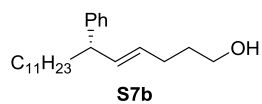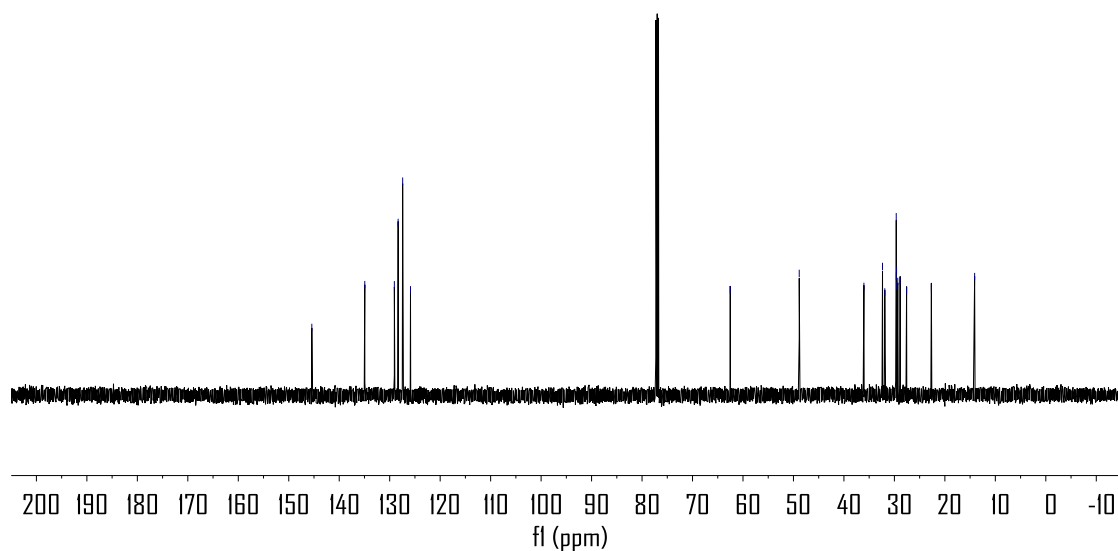

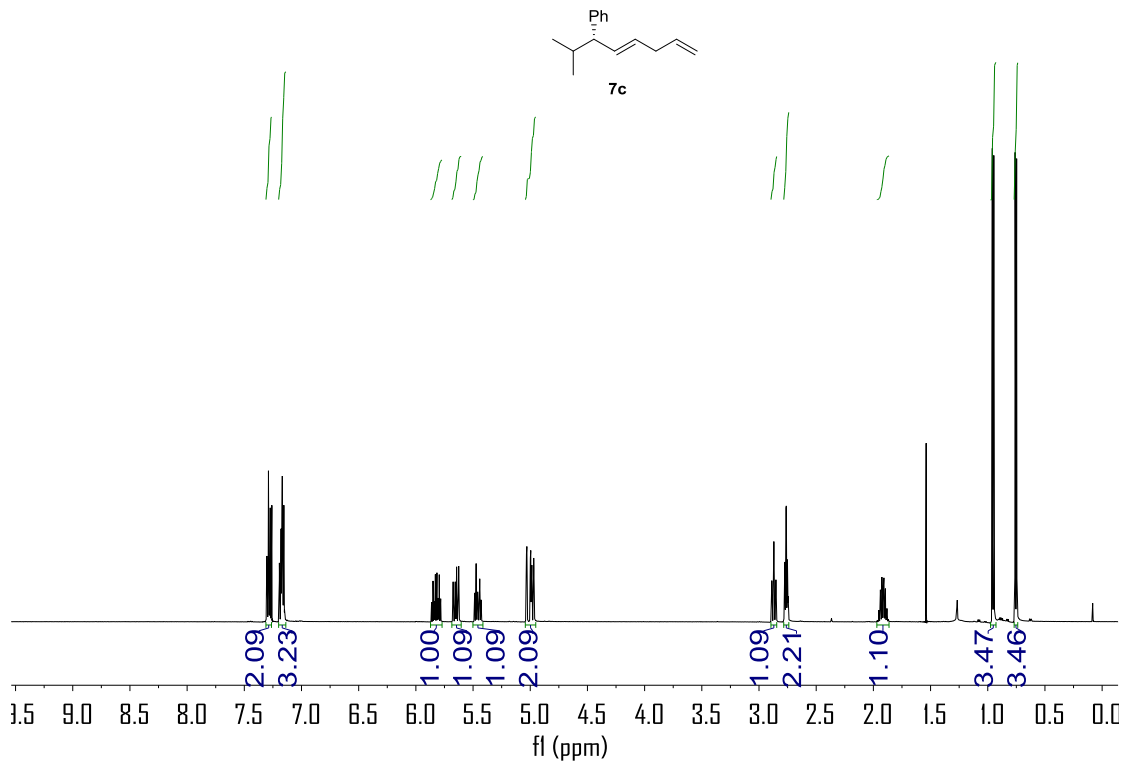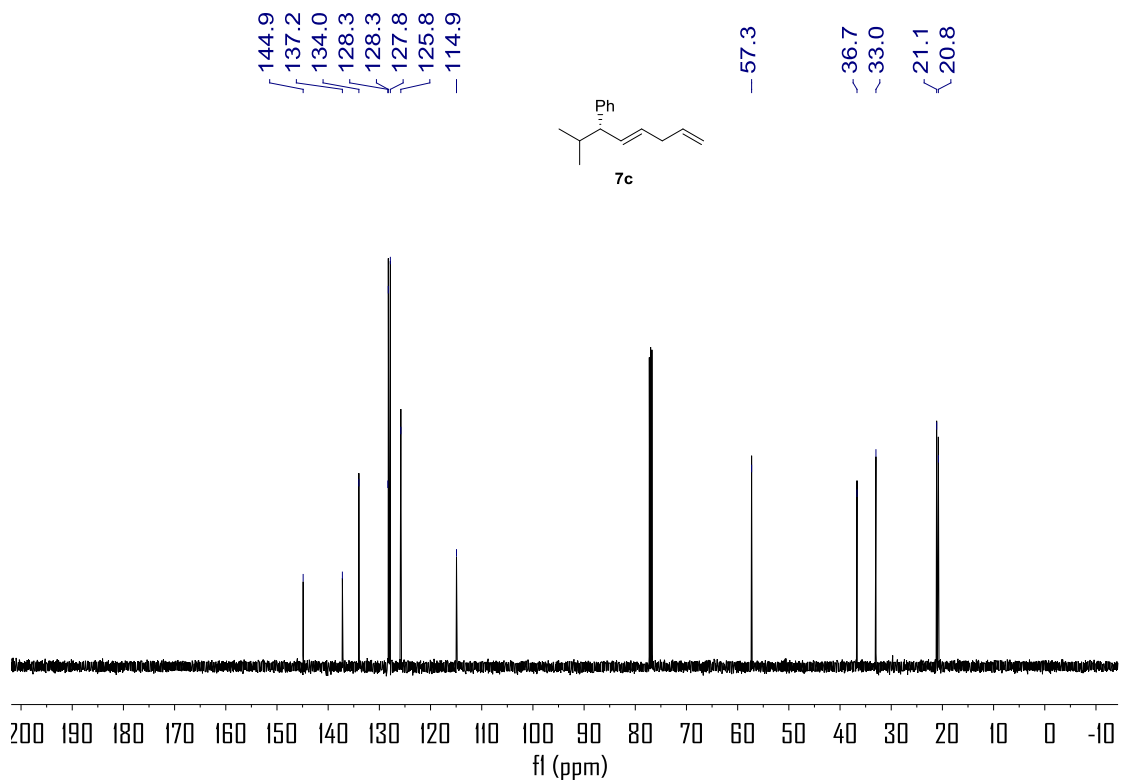

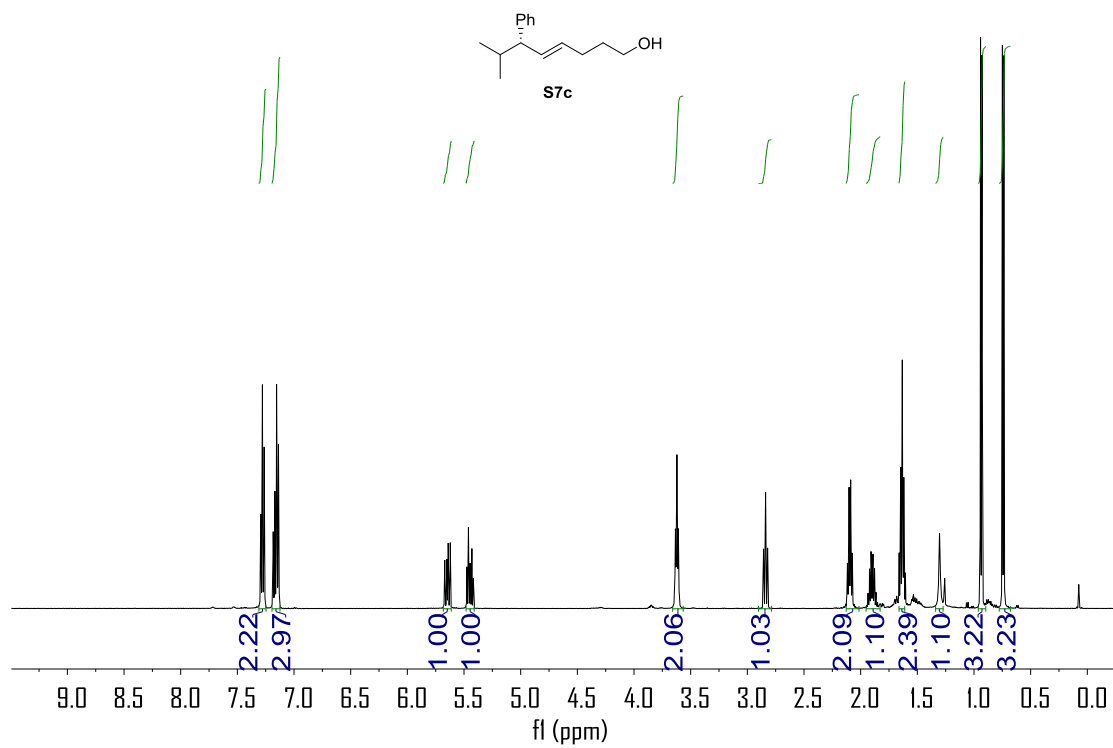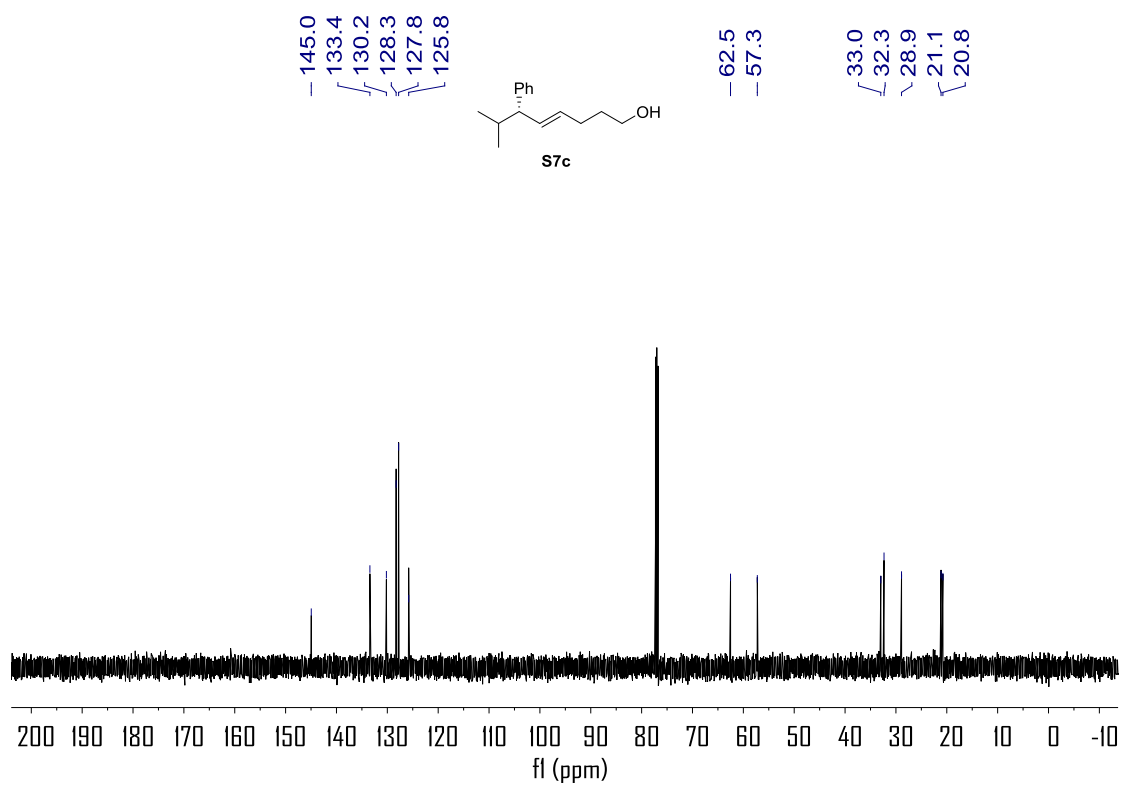

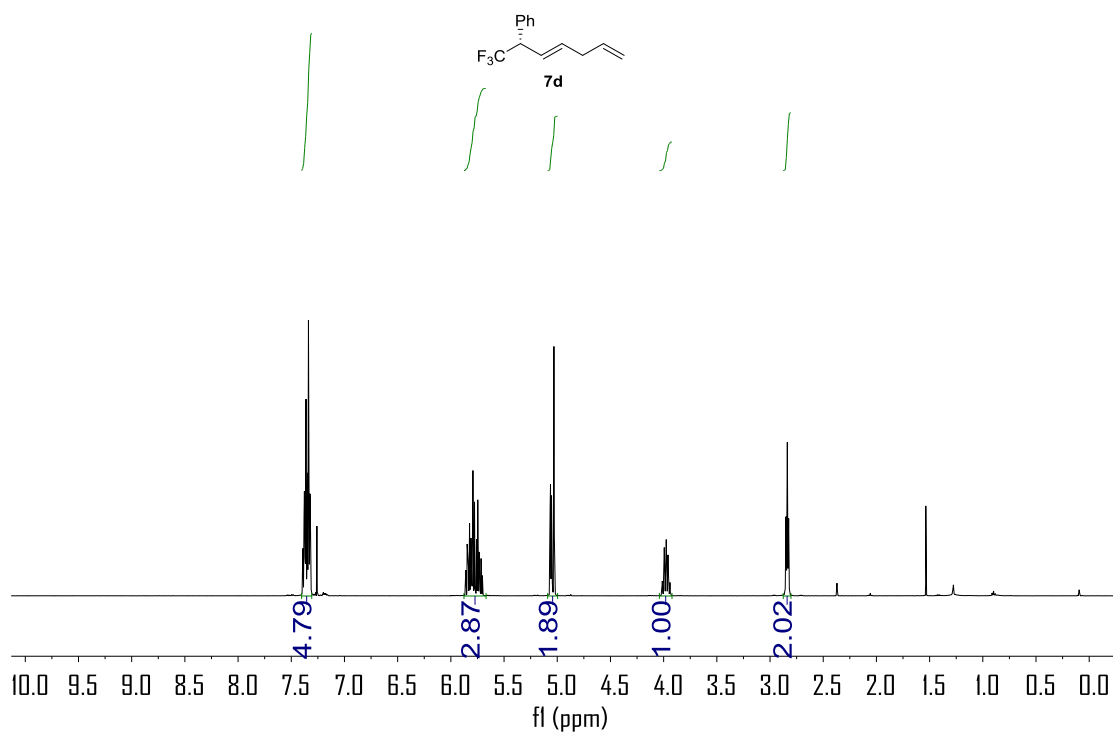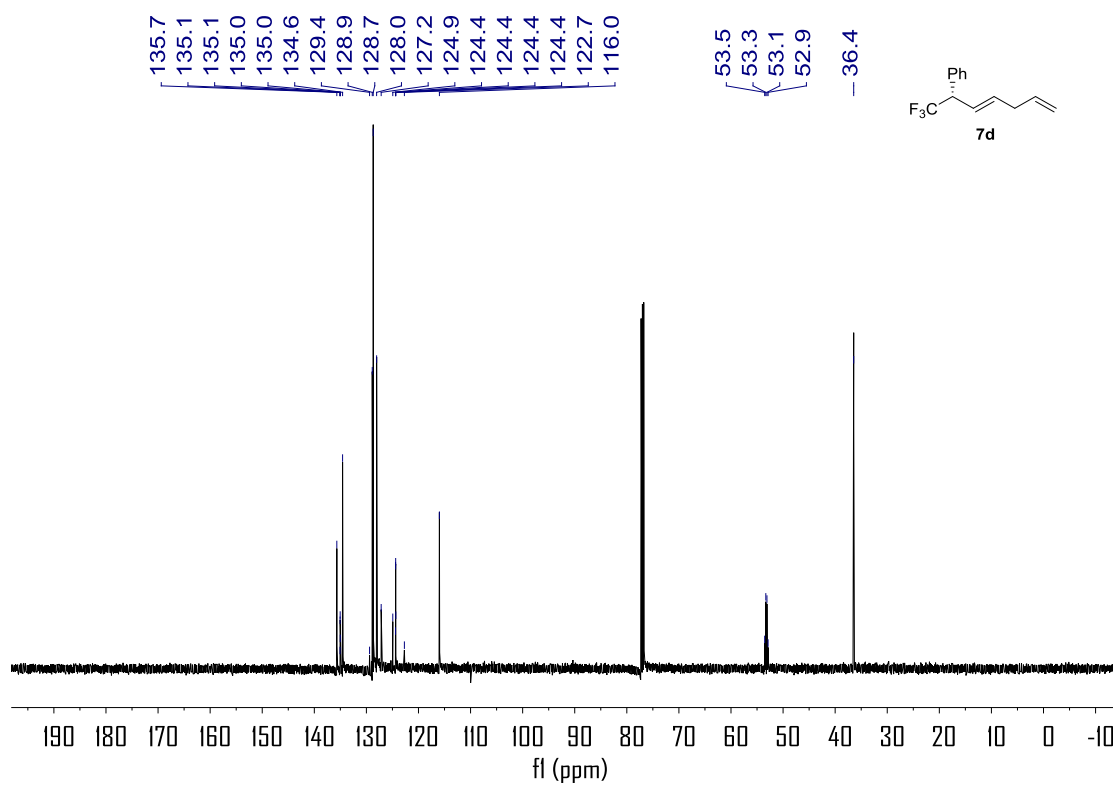



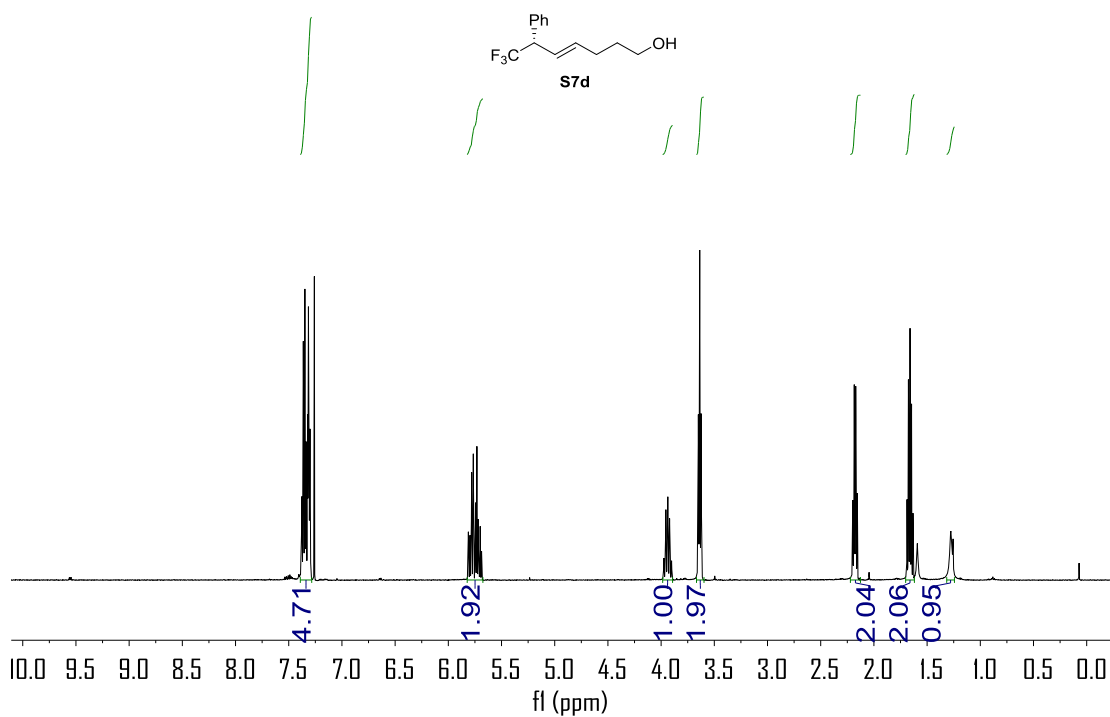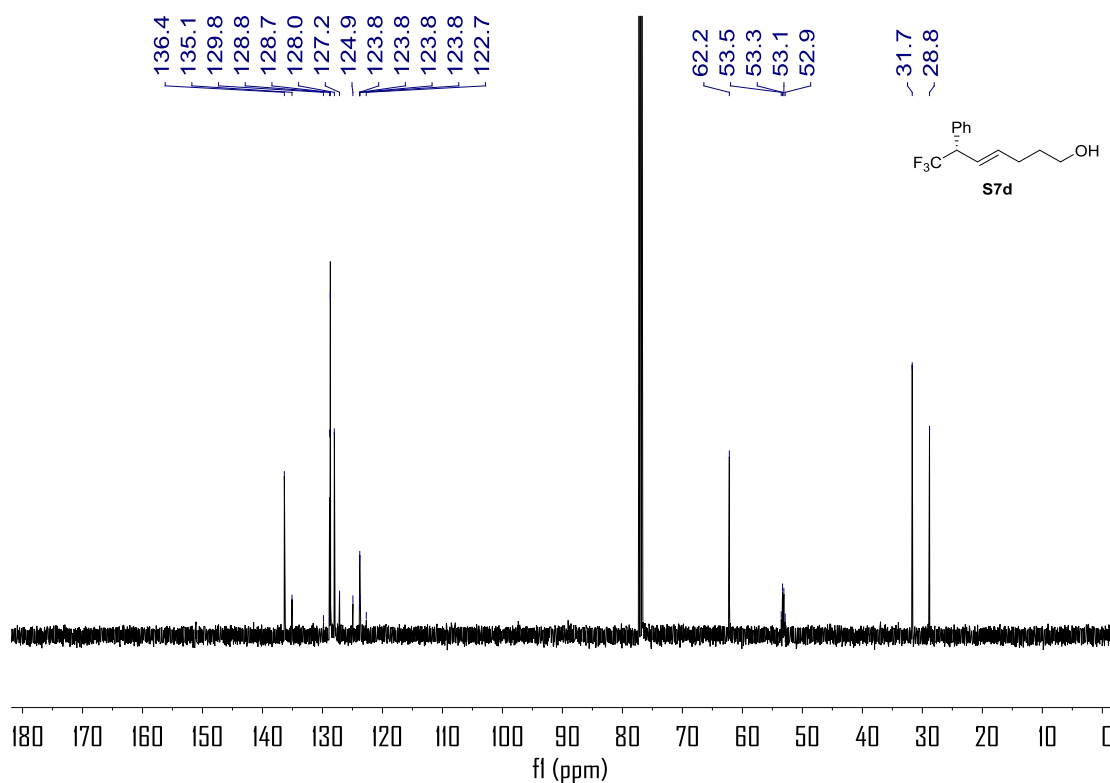

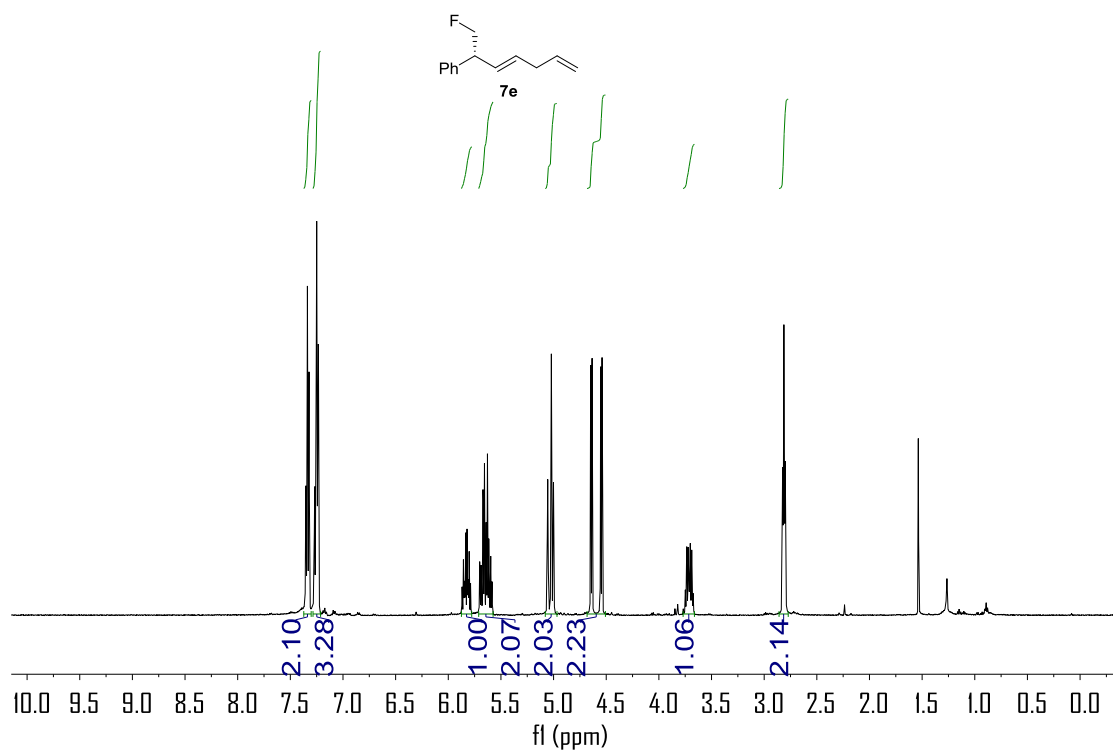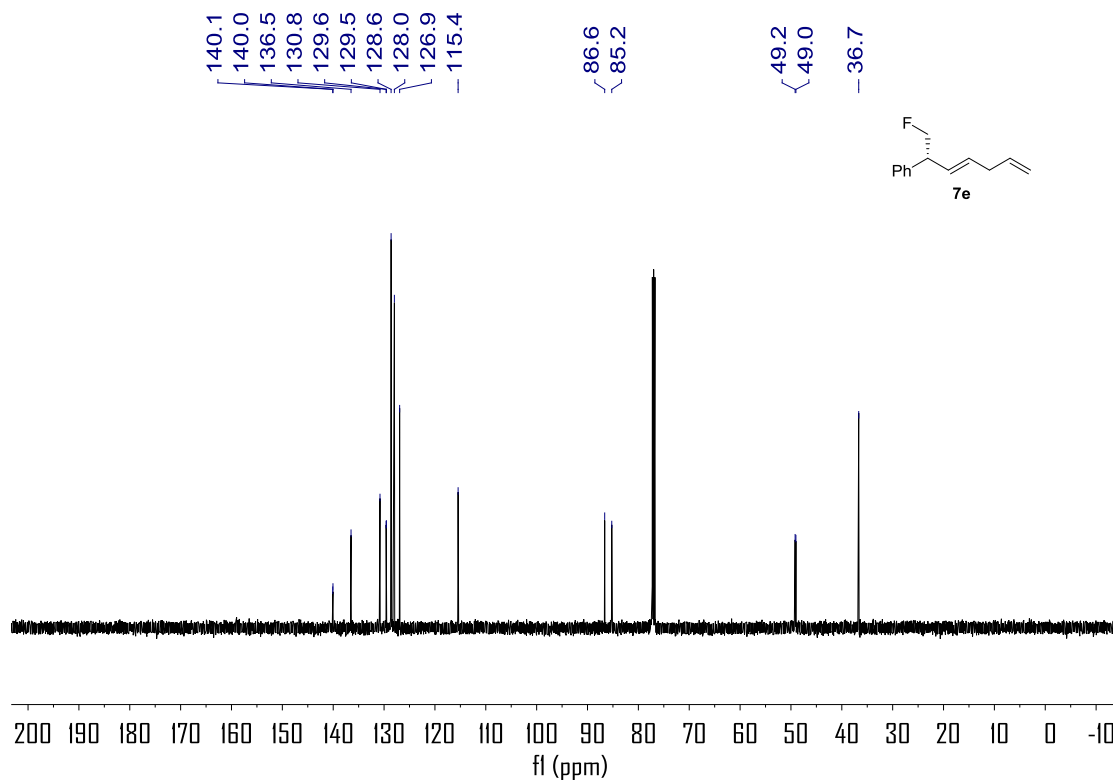

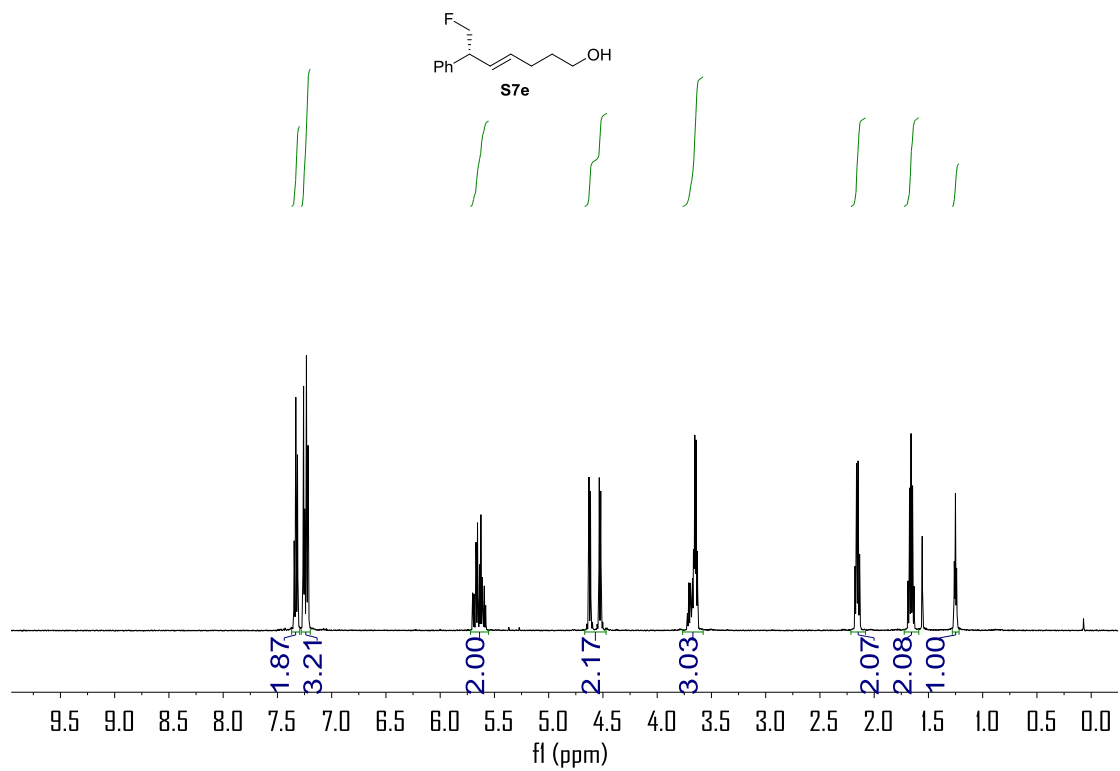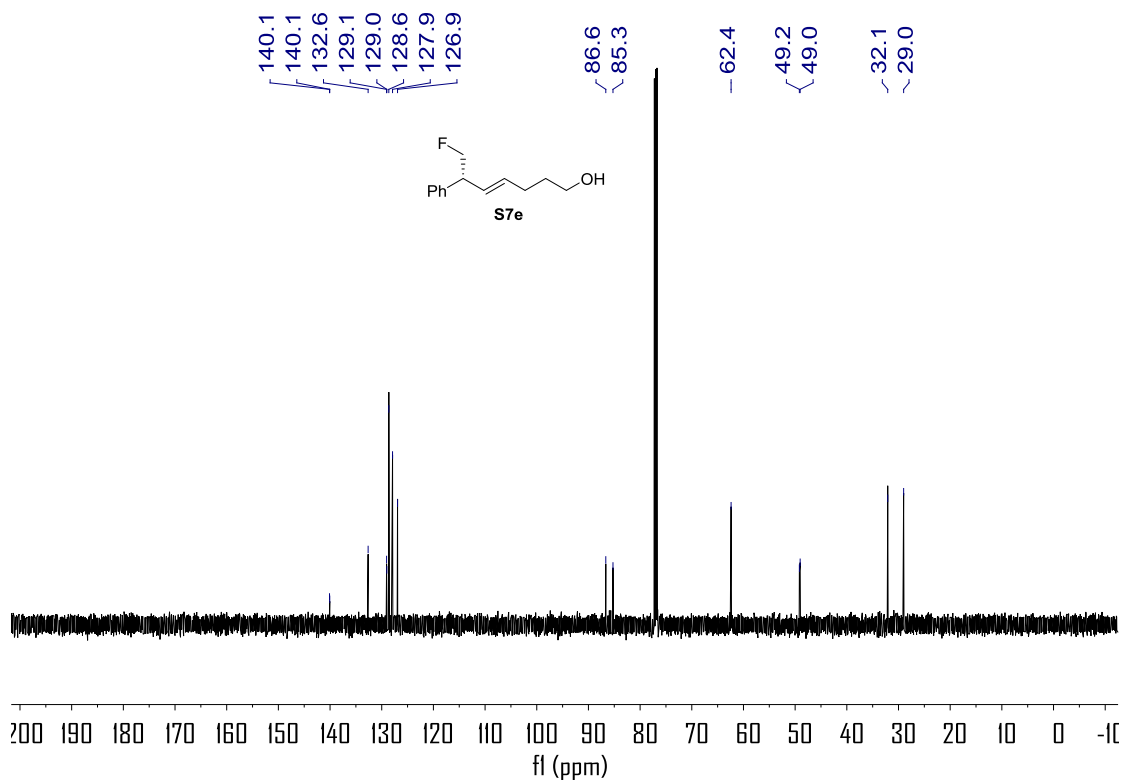

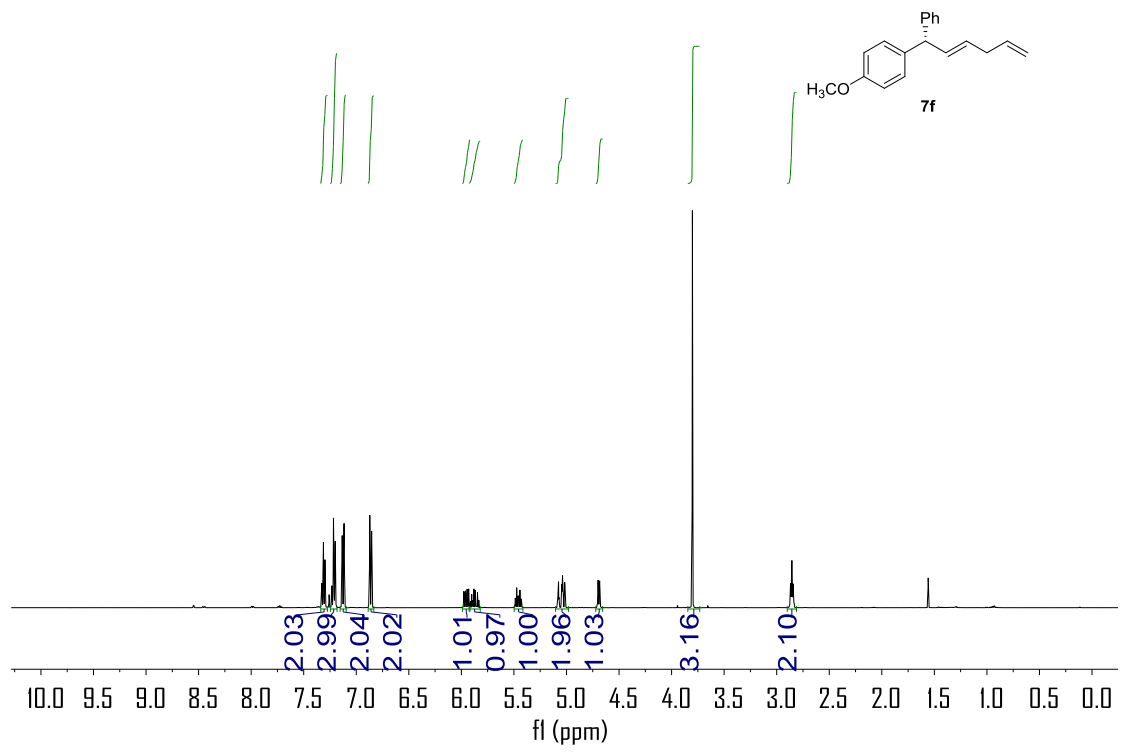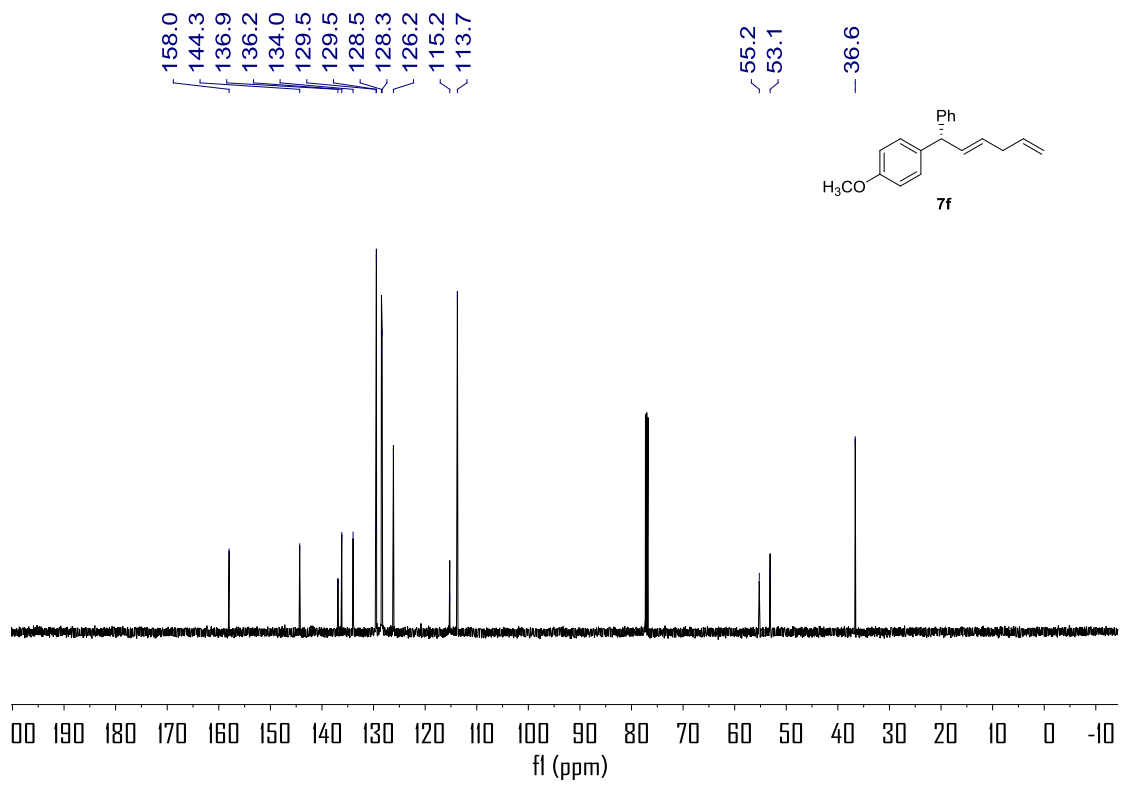

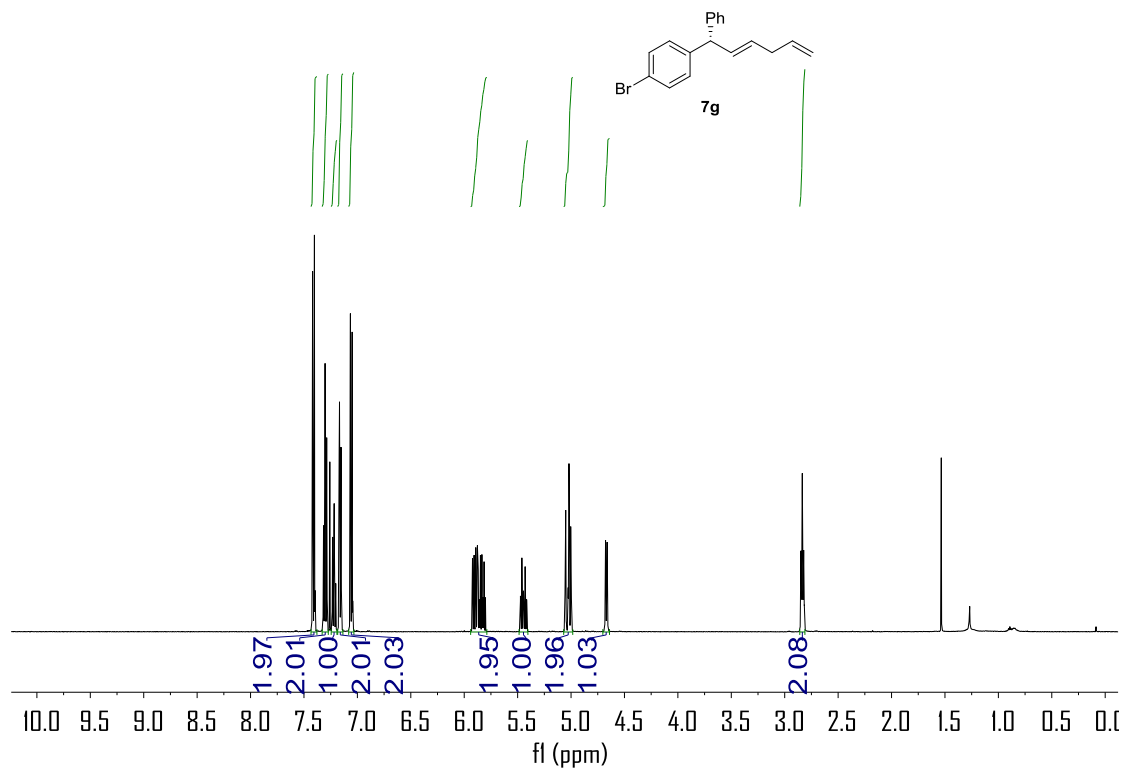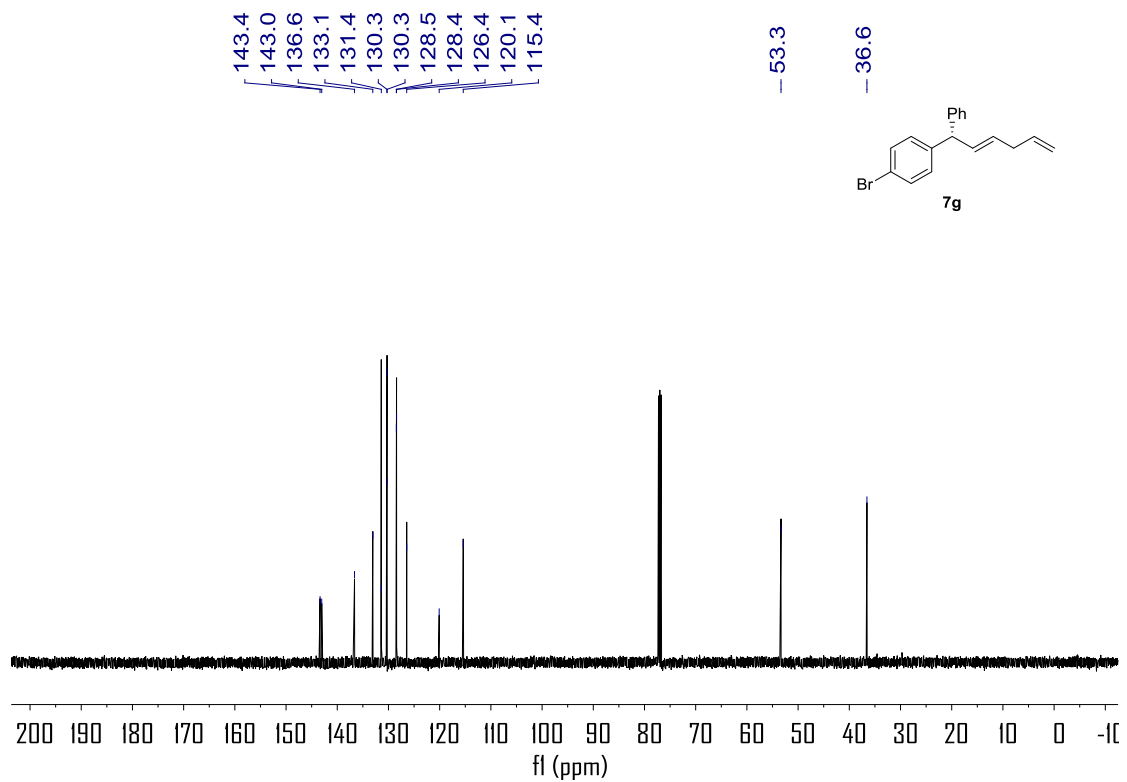

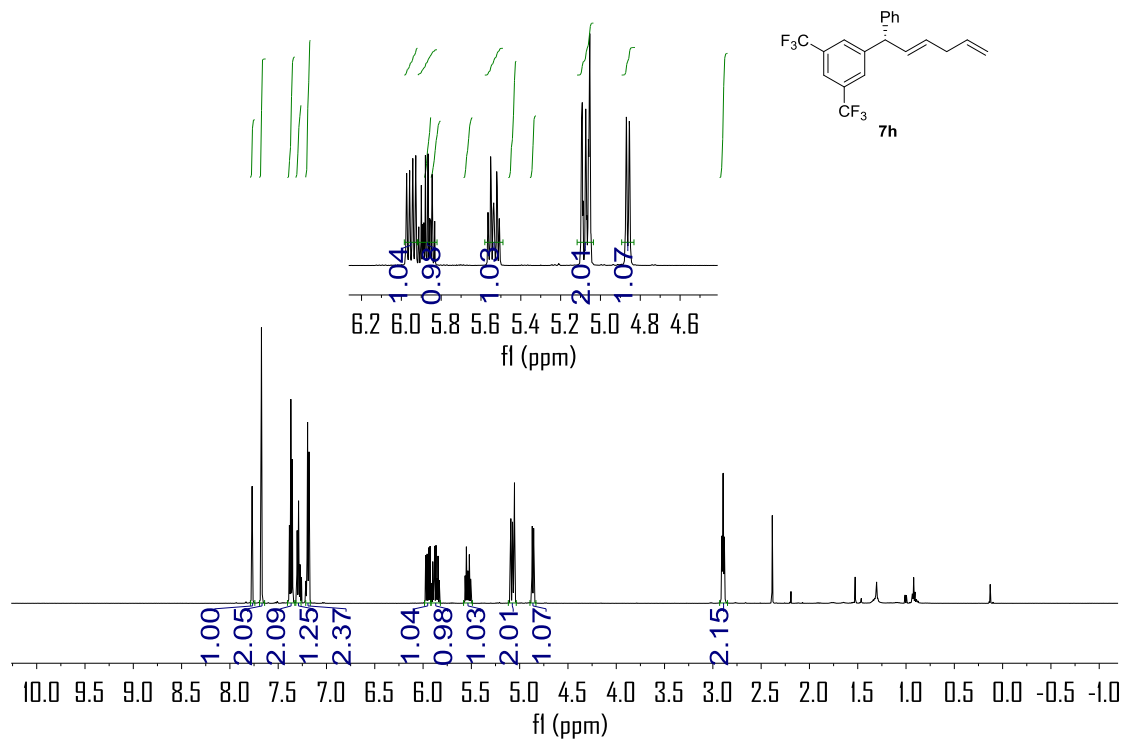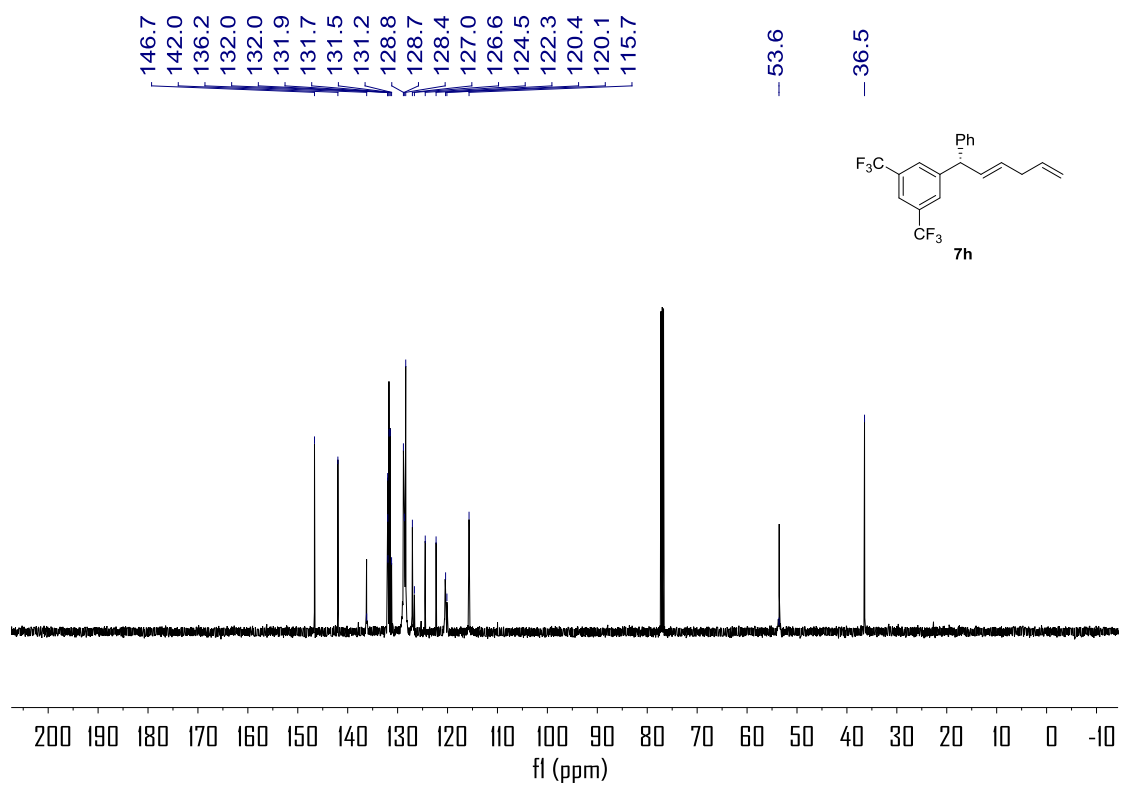

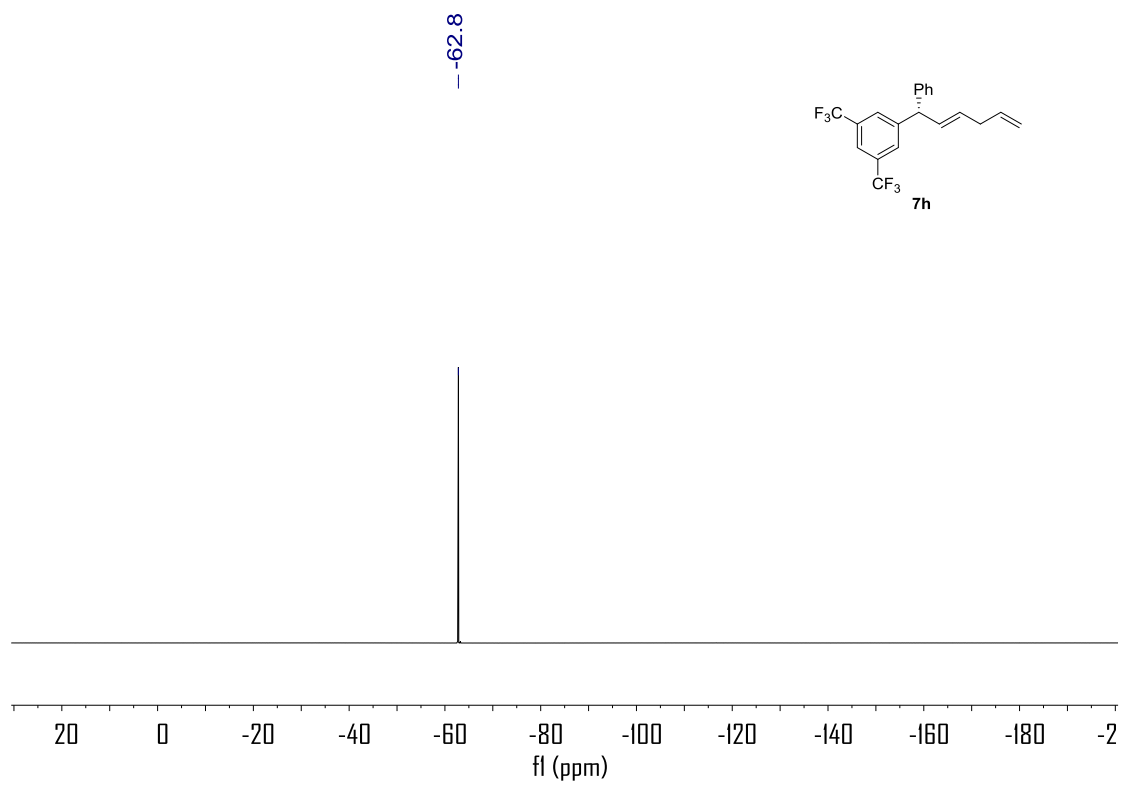

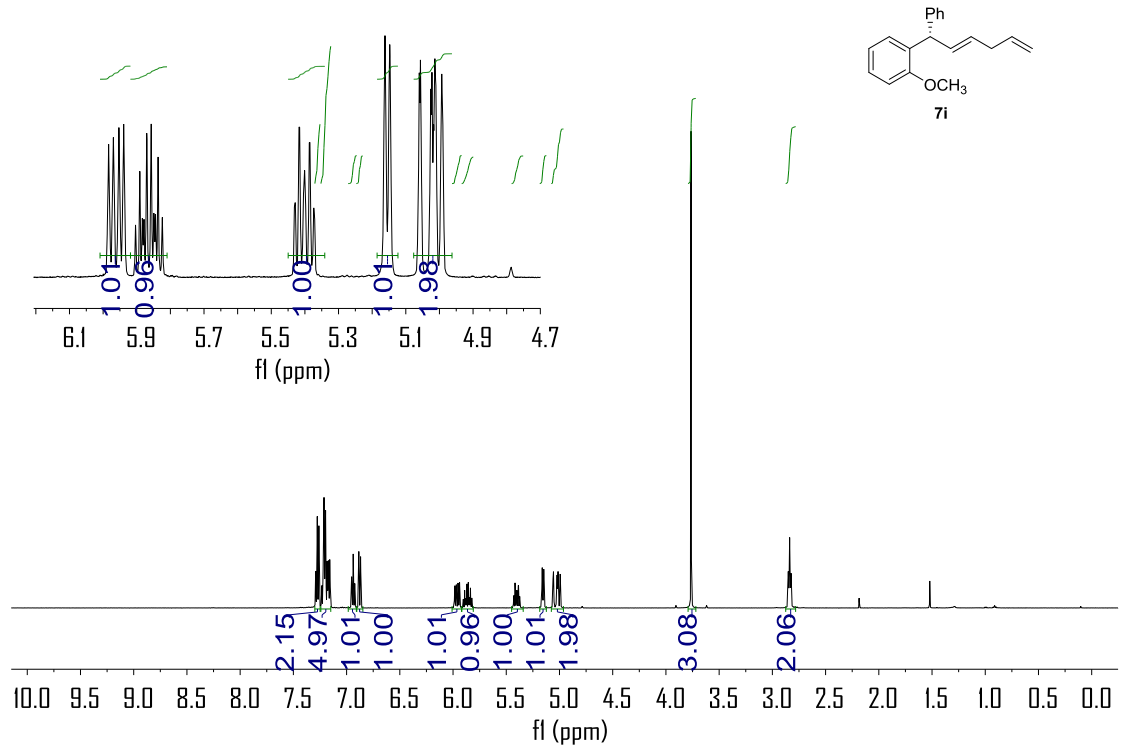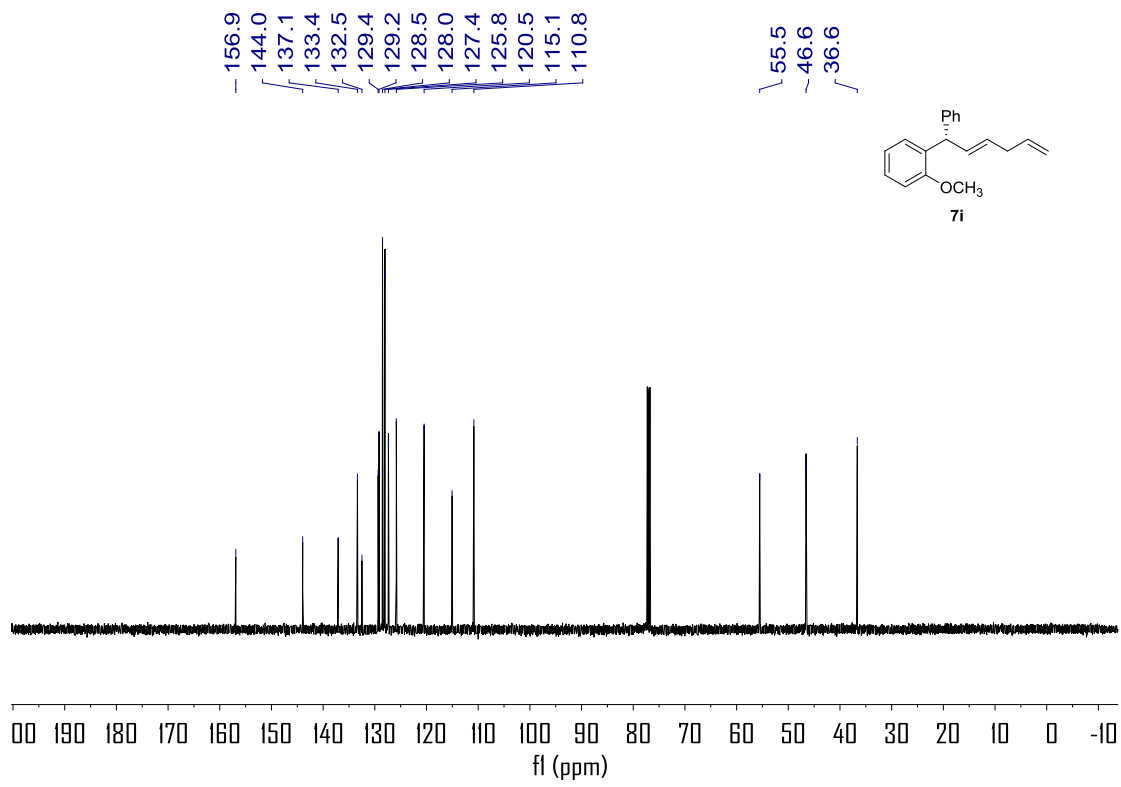



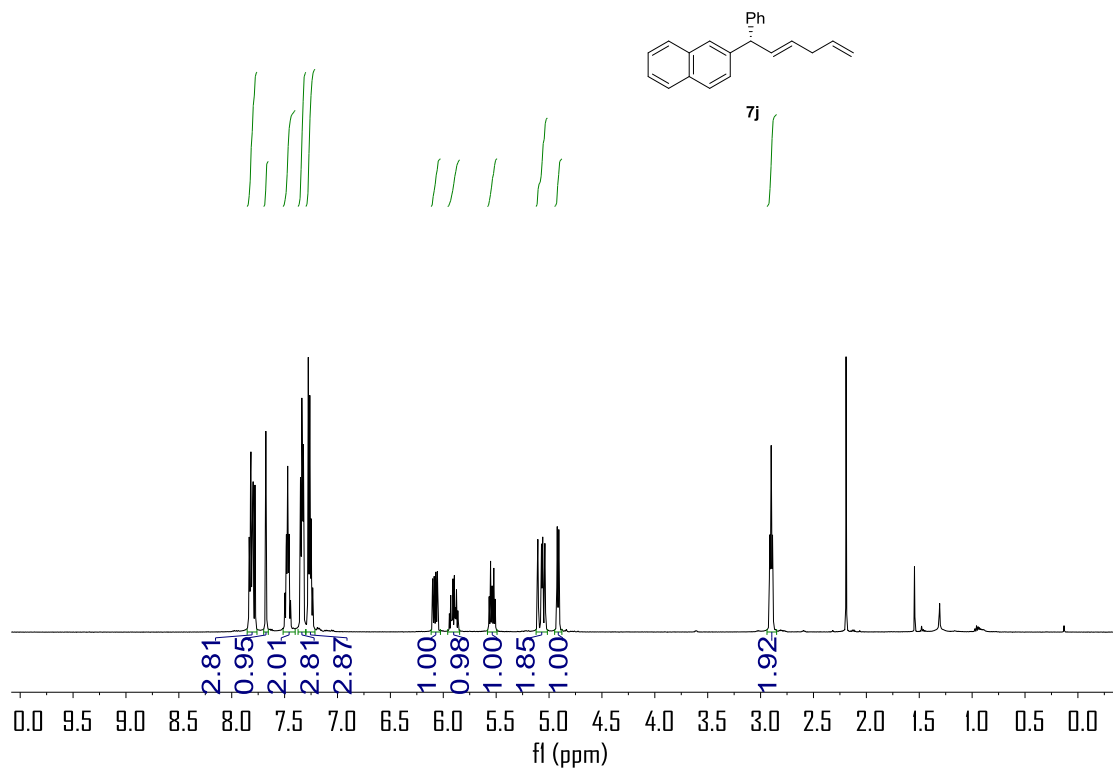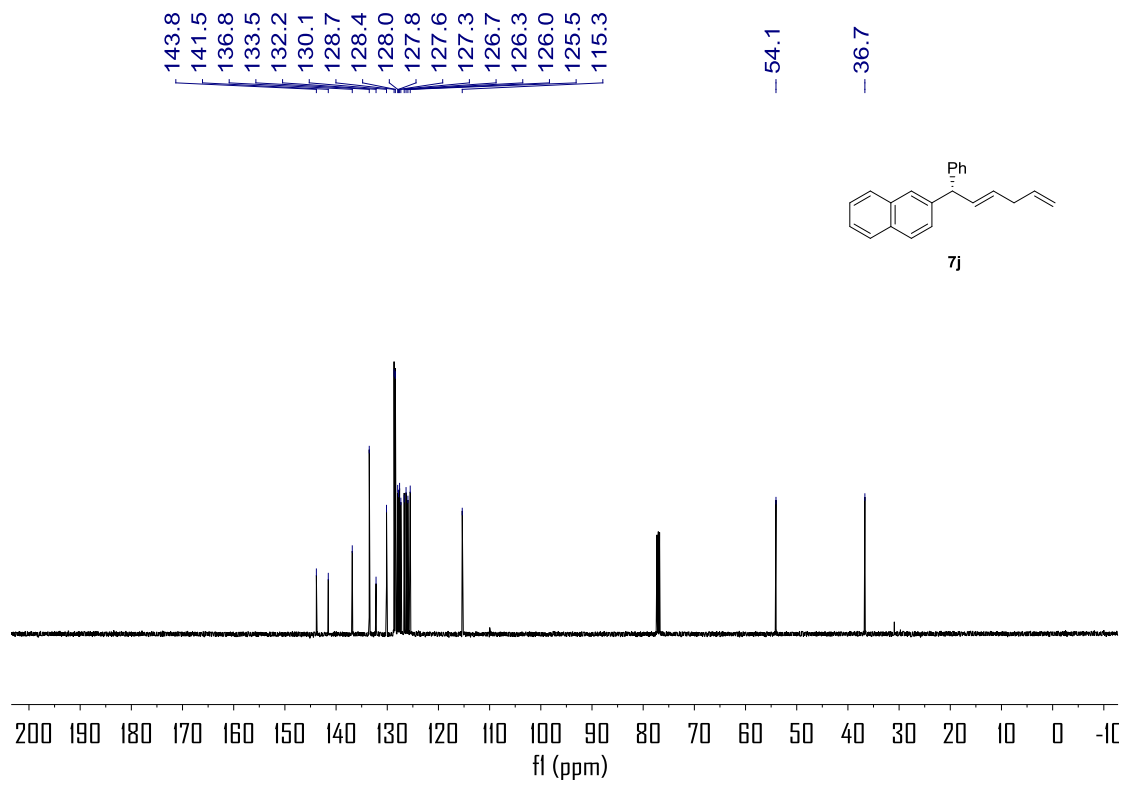

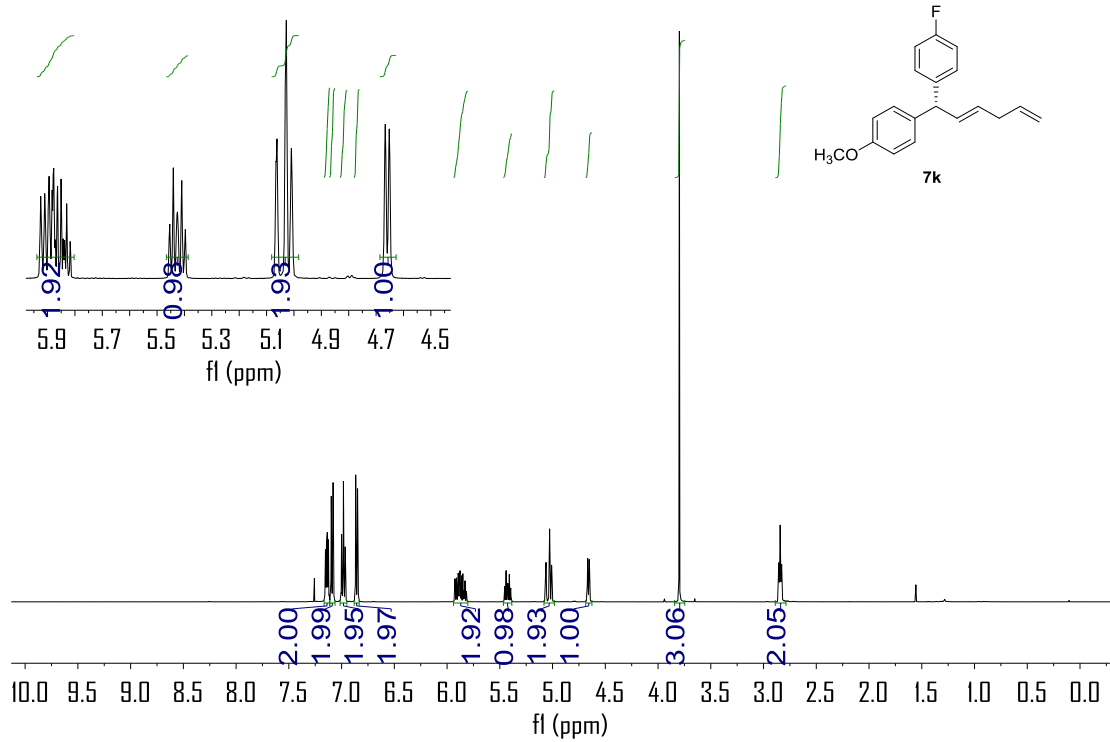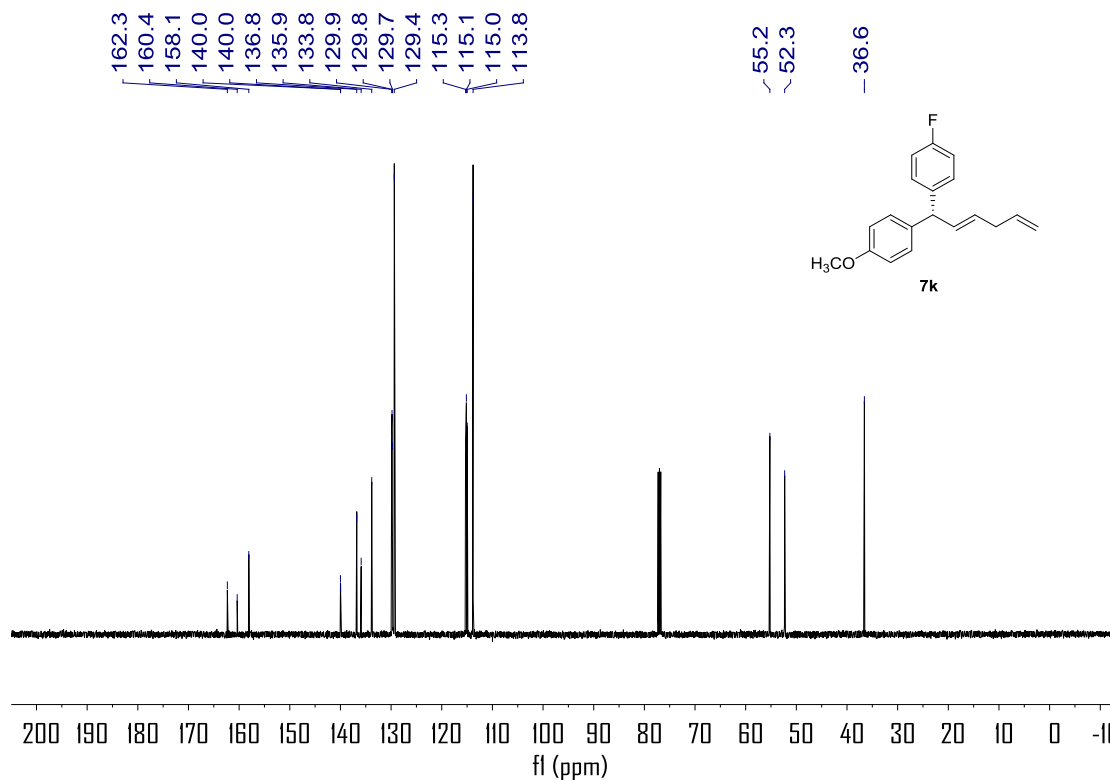

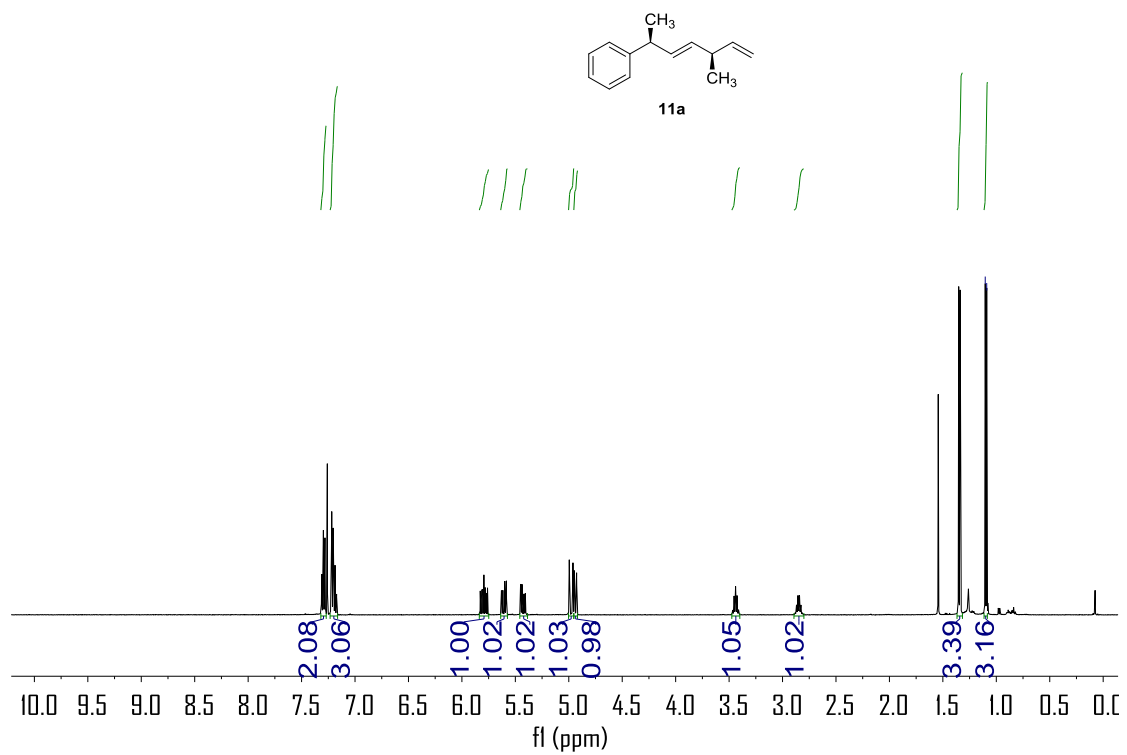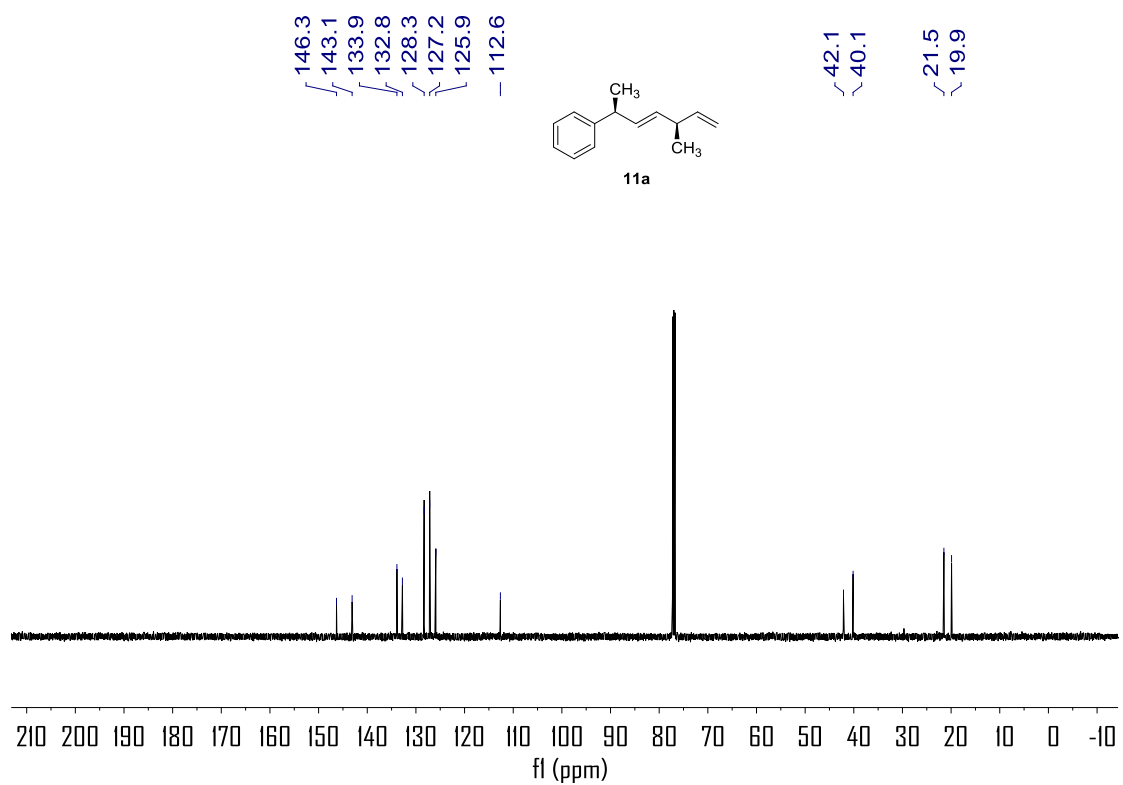

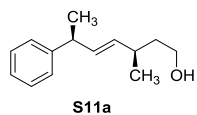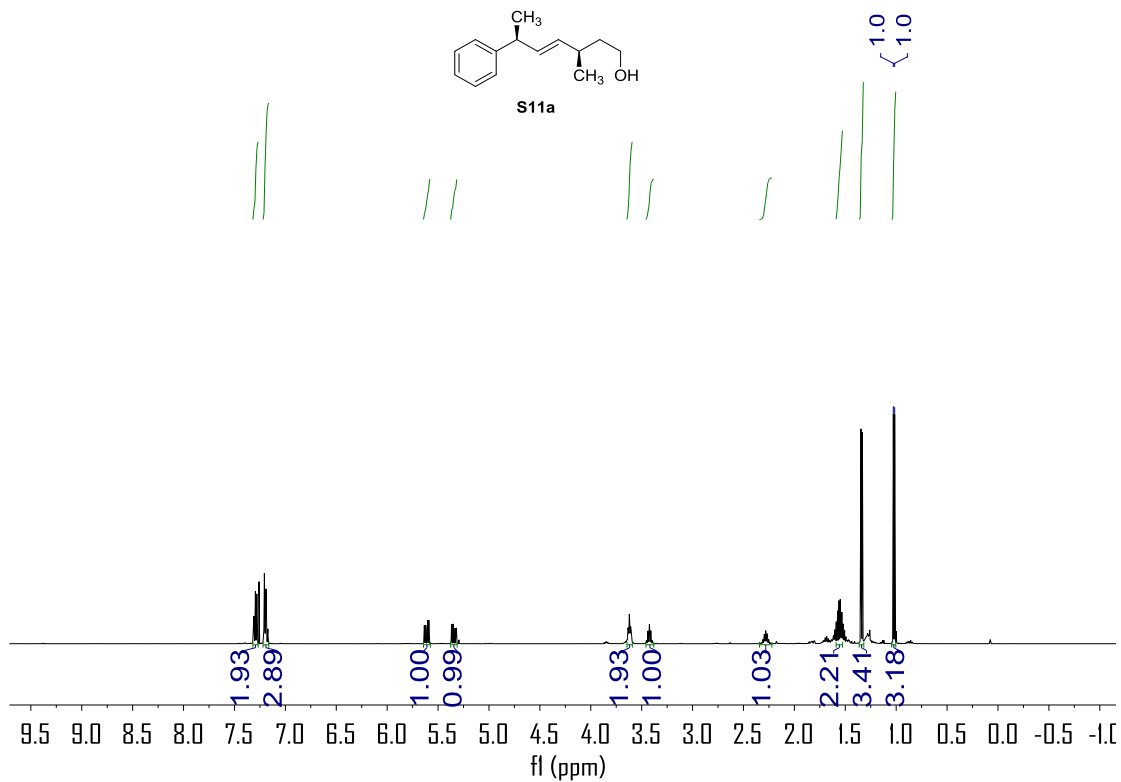

146.3  
 134.5  
 134.0  
 128.4  
 127.1  
 126.0

61.4  
 42.1  
 39.8  
 33.9  
 21.5  
 21.1

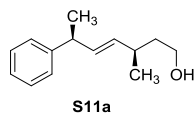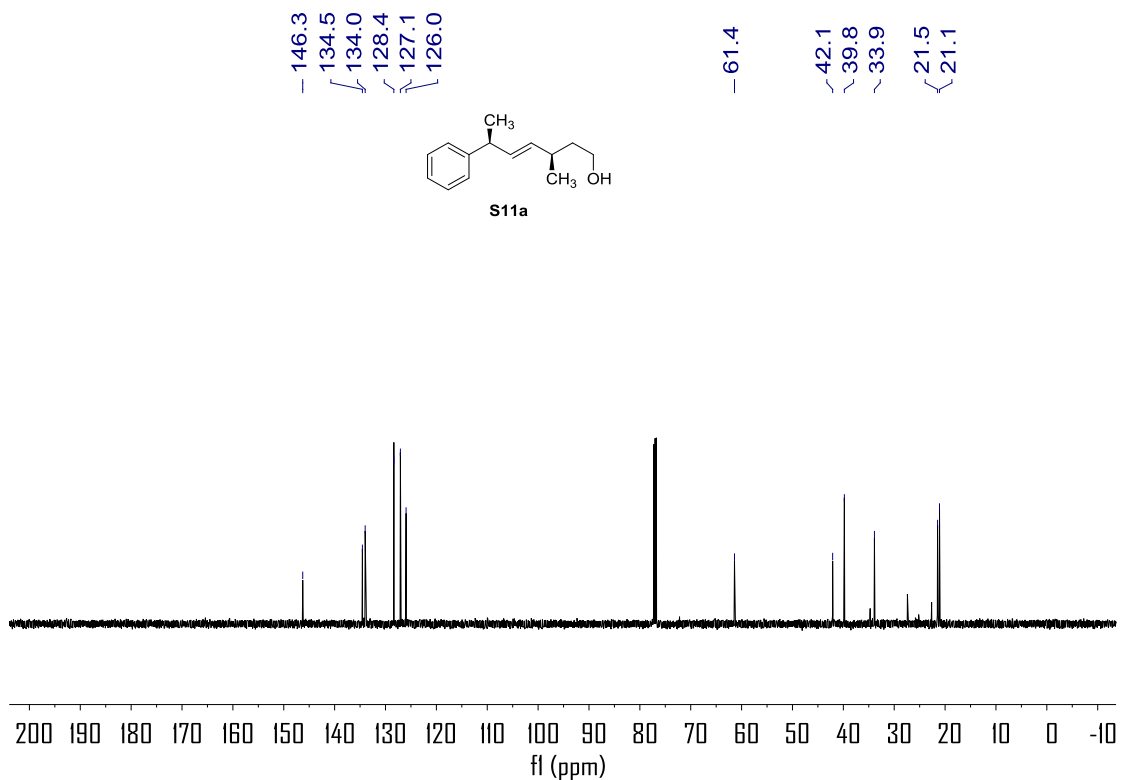

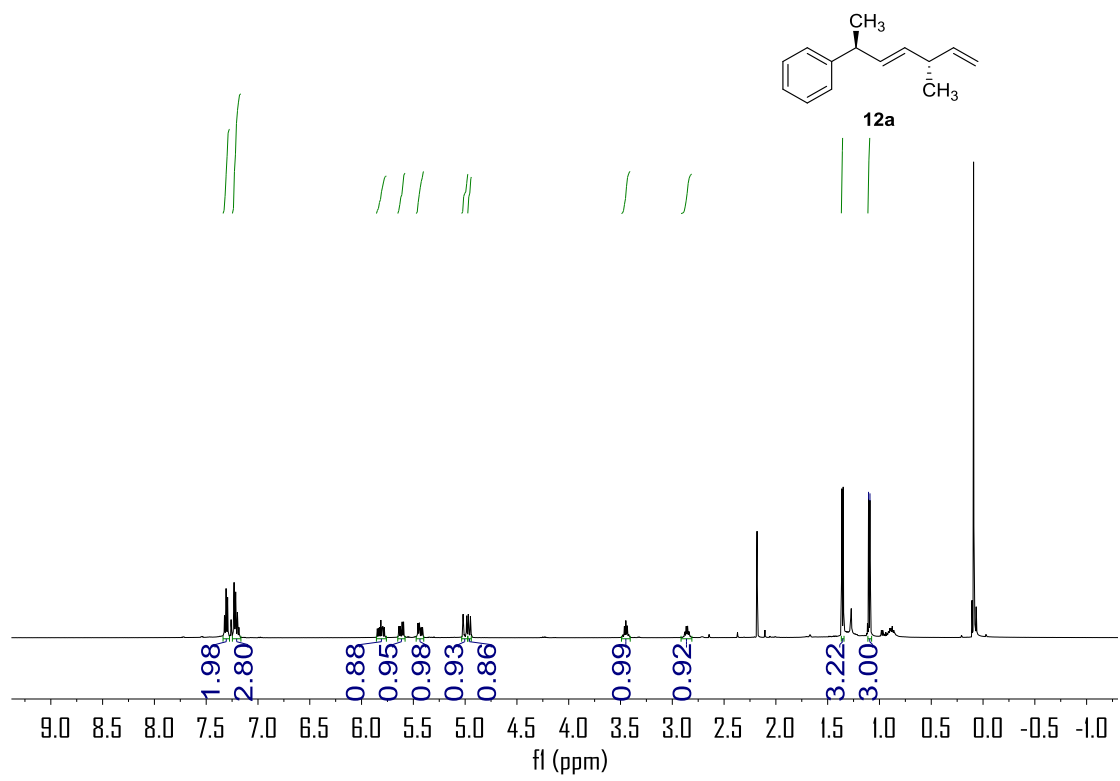

146.3  
143.1  
133.9  
132.8  
128.3  
127.2  
125.9  
- 112.7

42.2  
40.2  
21.5  
19.9

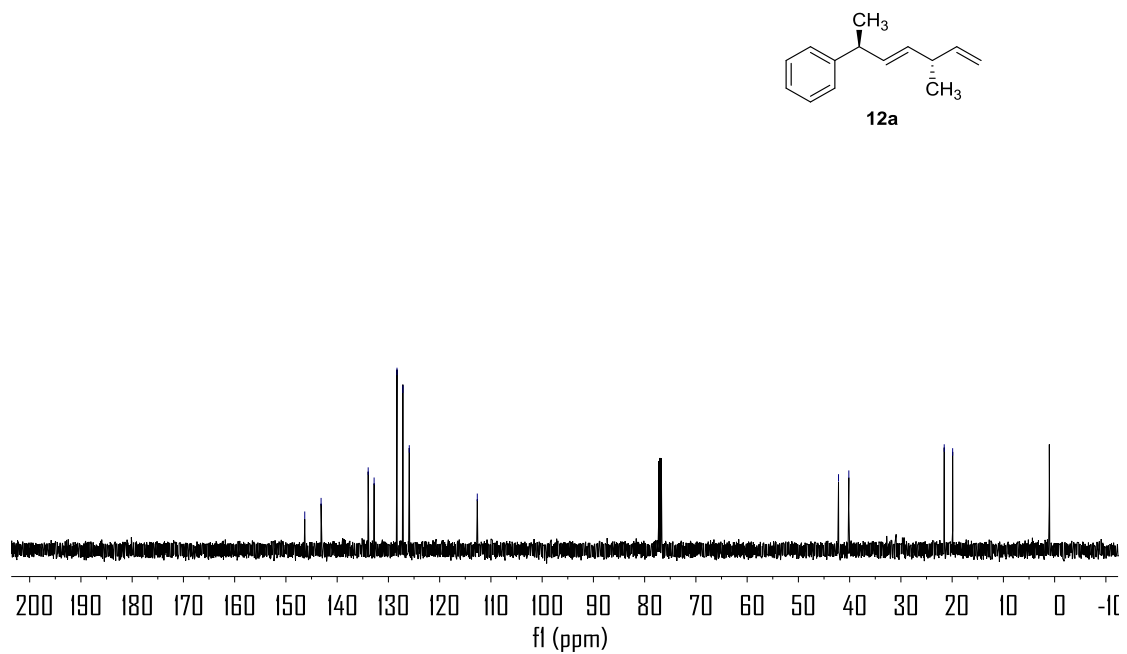

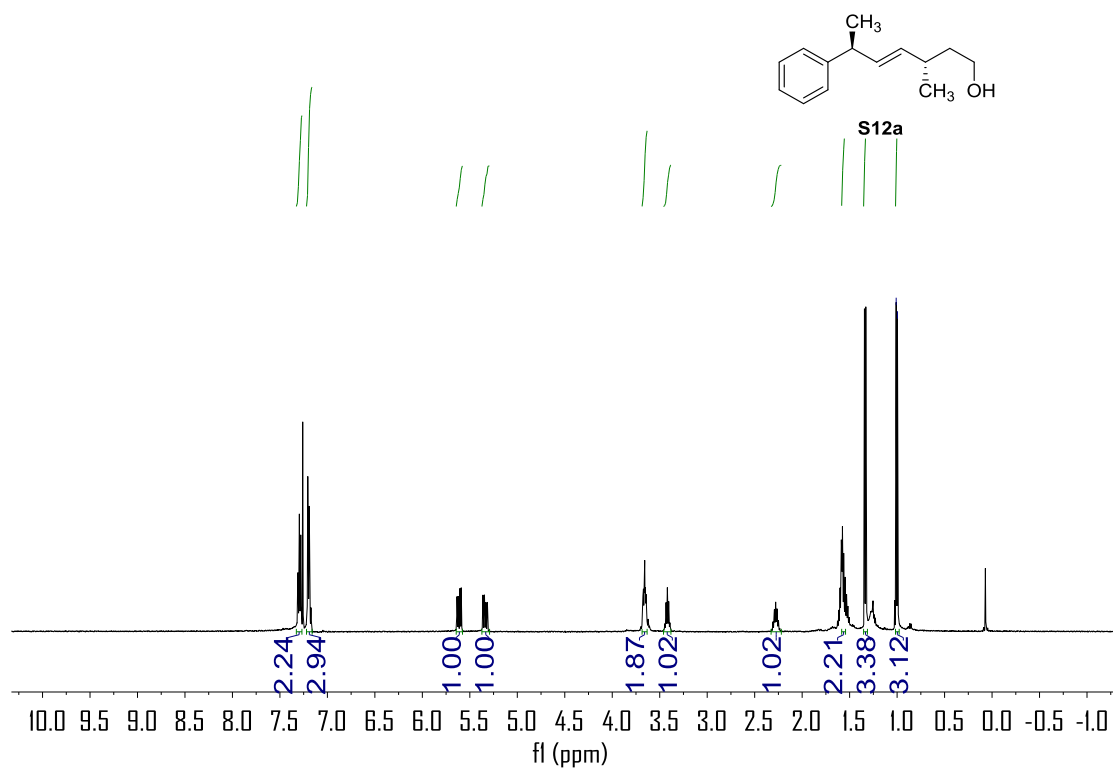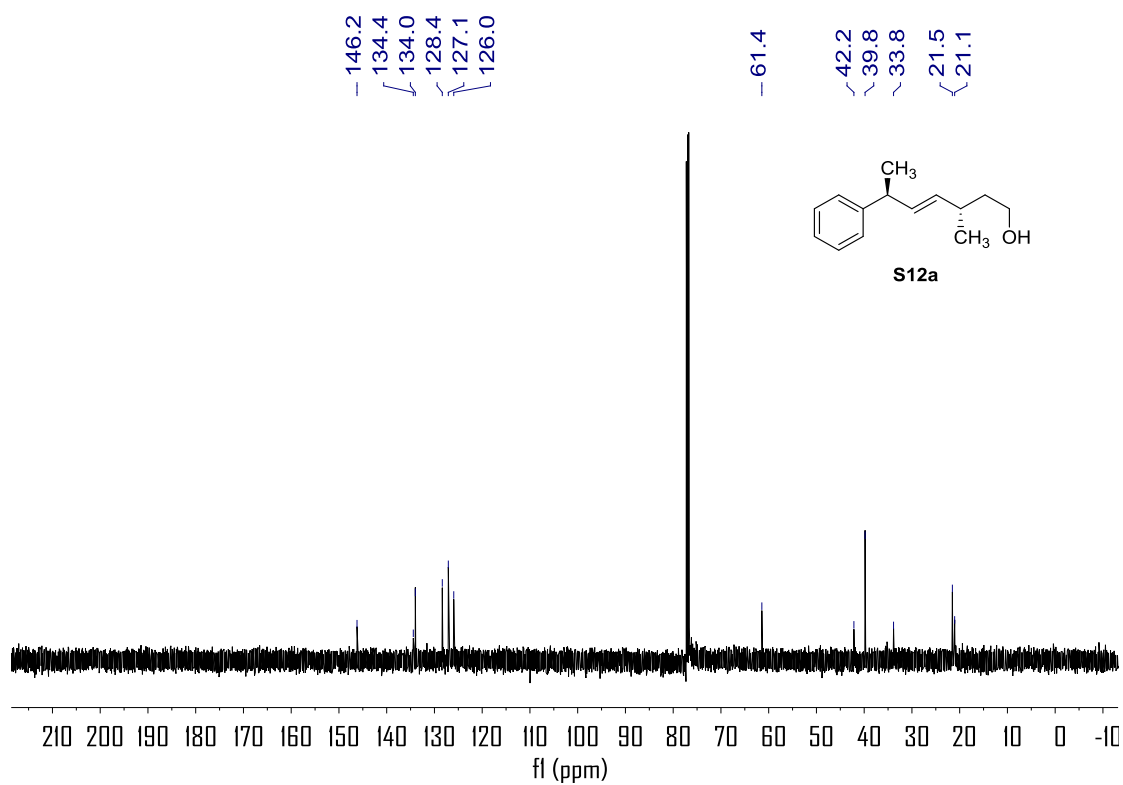

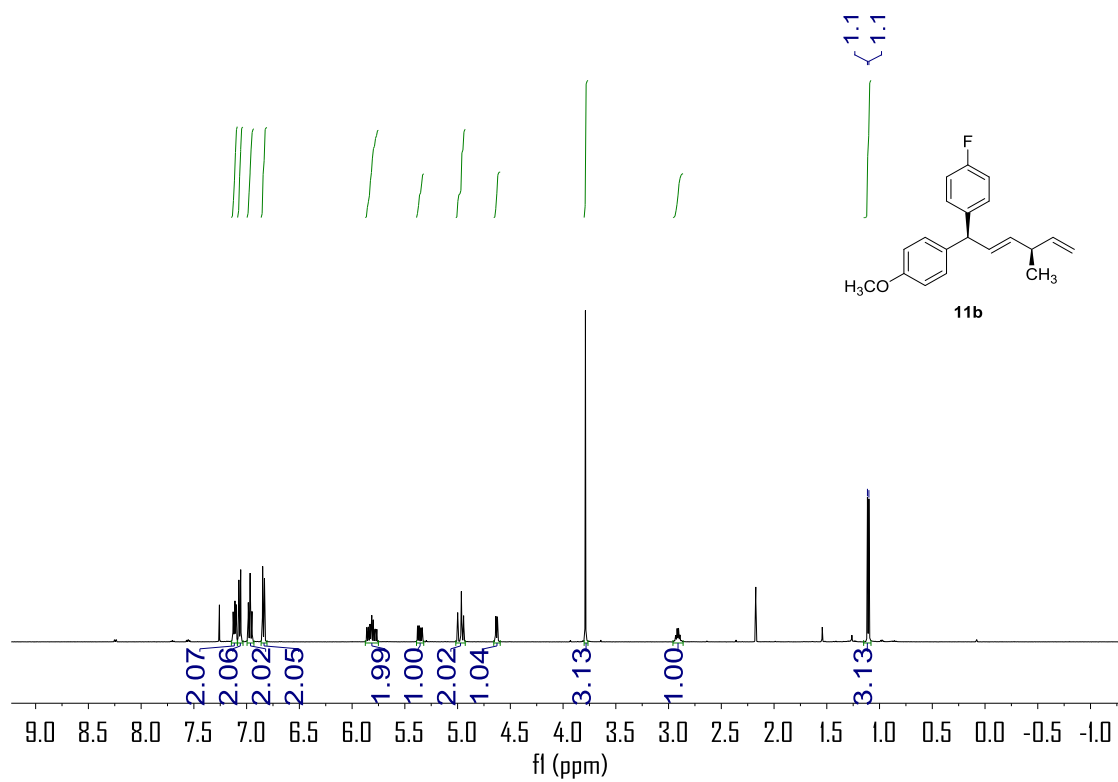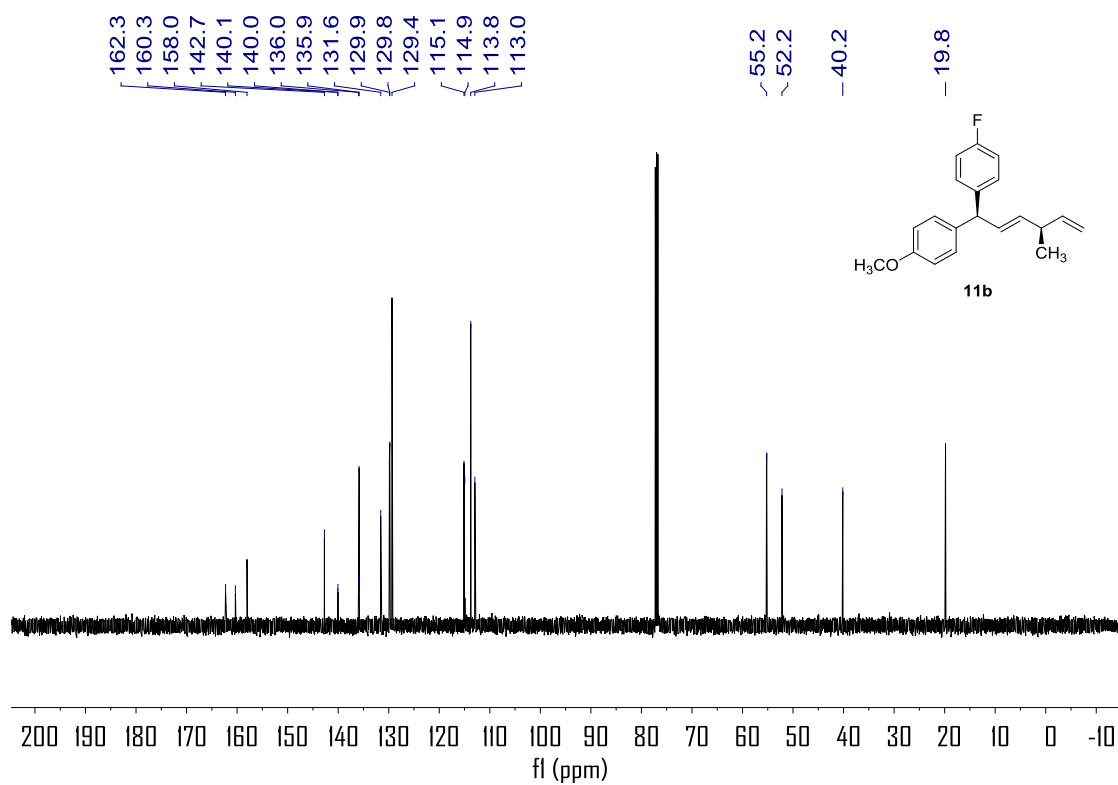

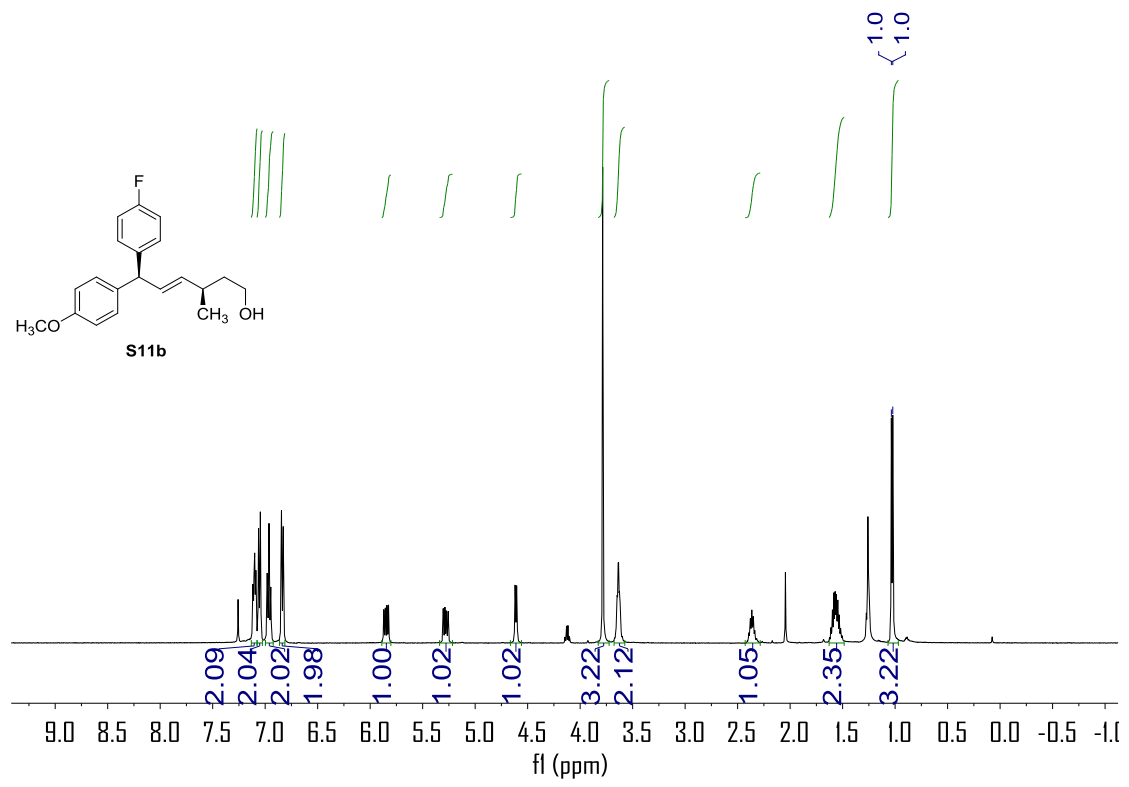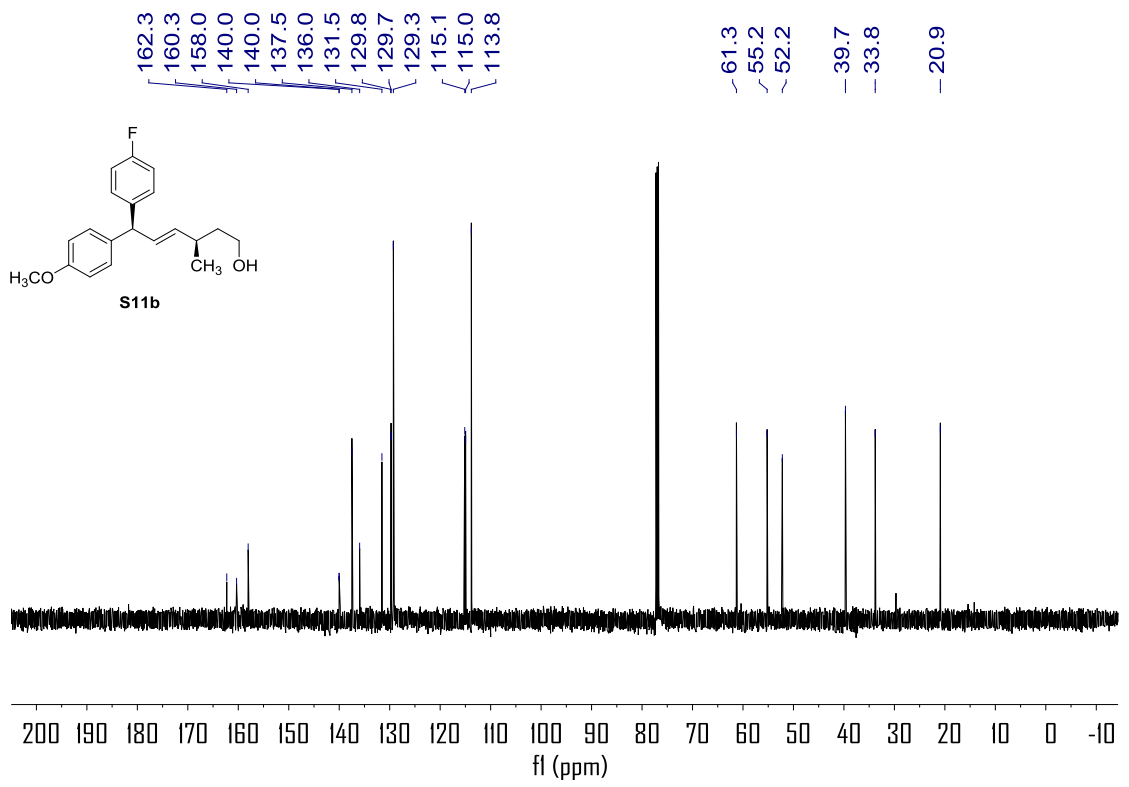



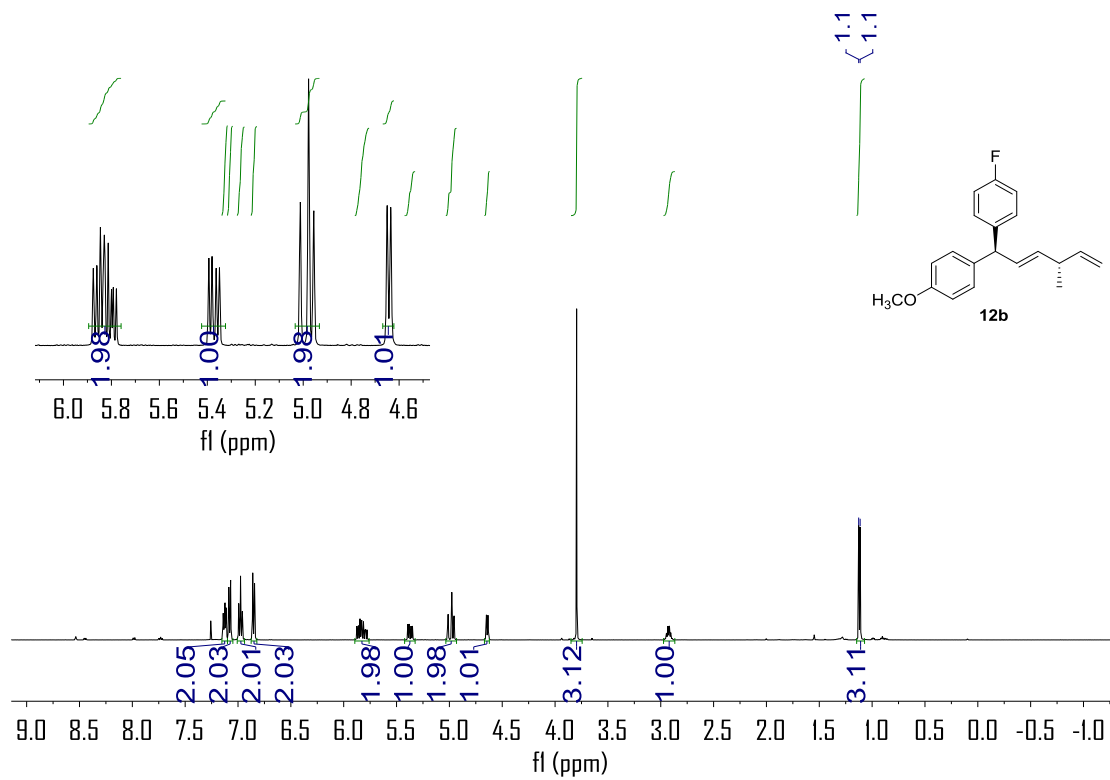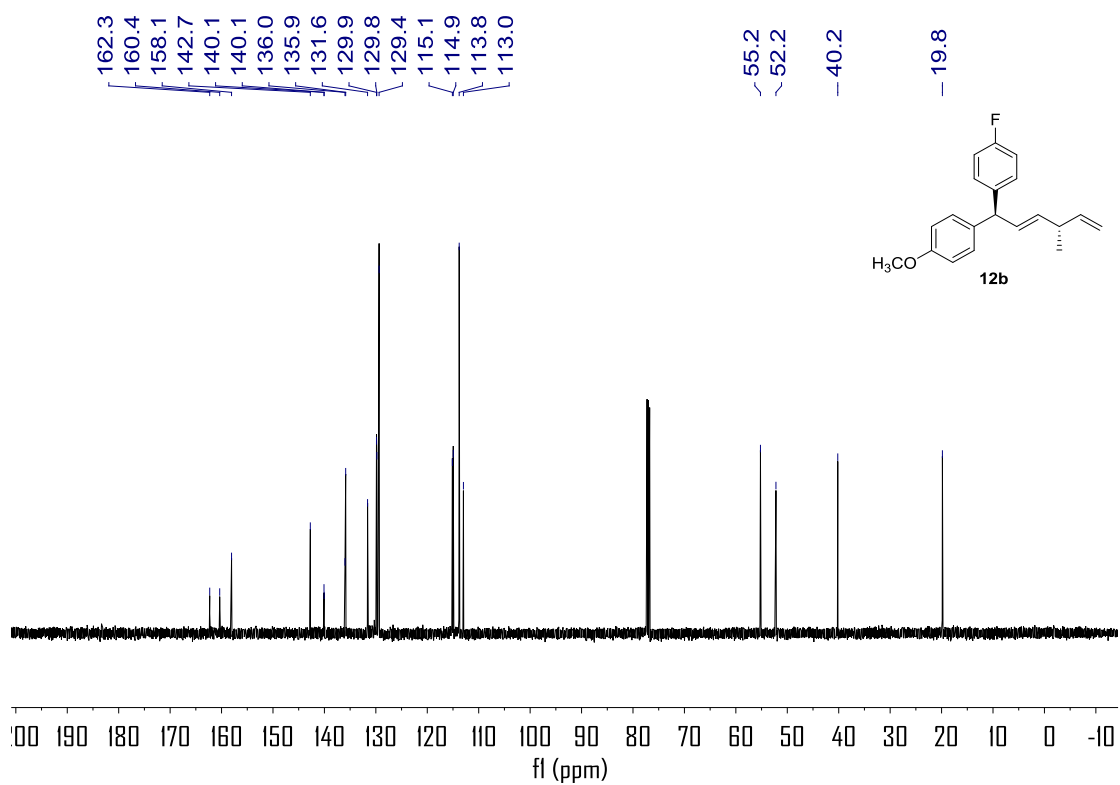

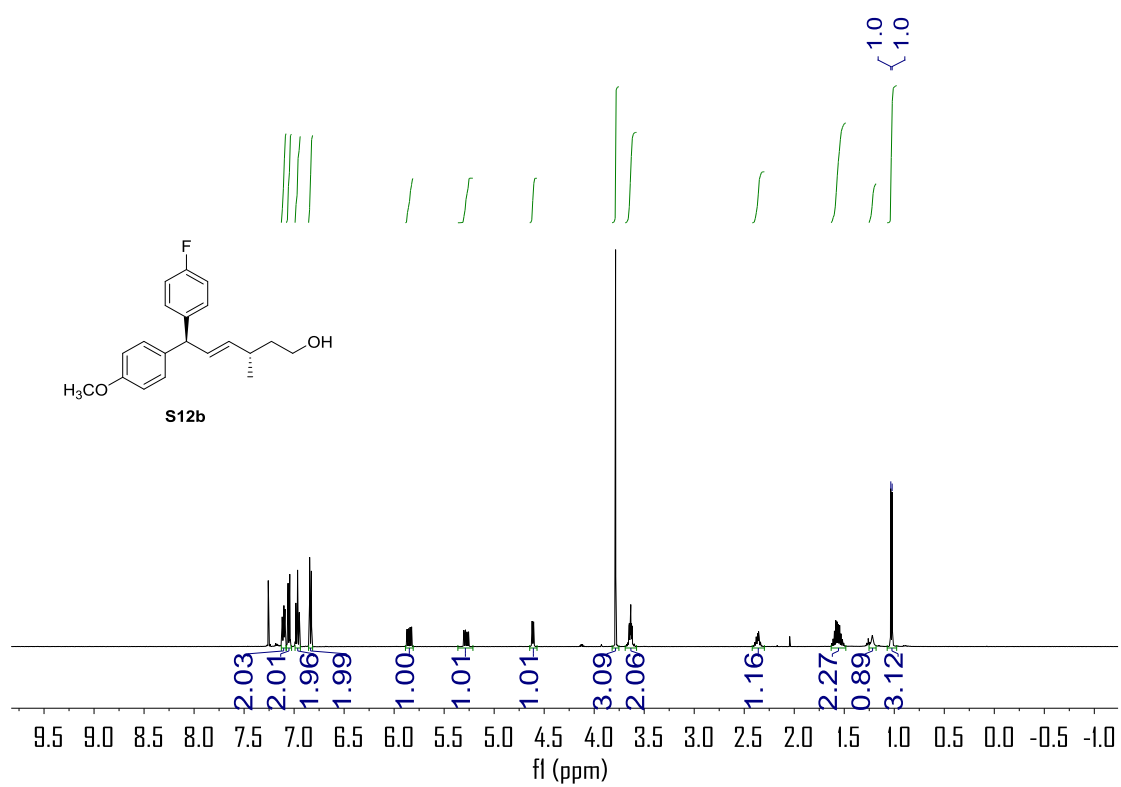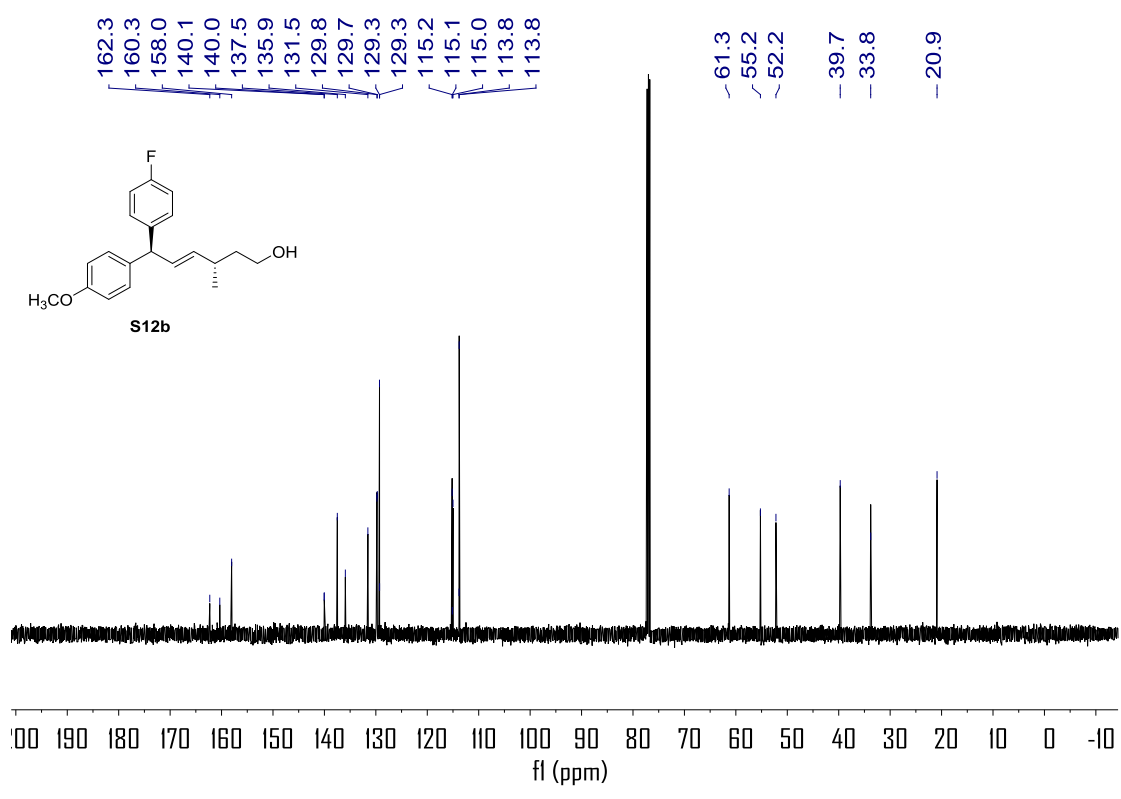

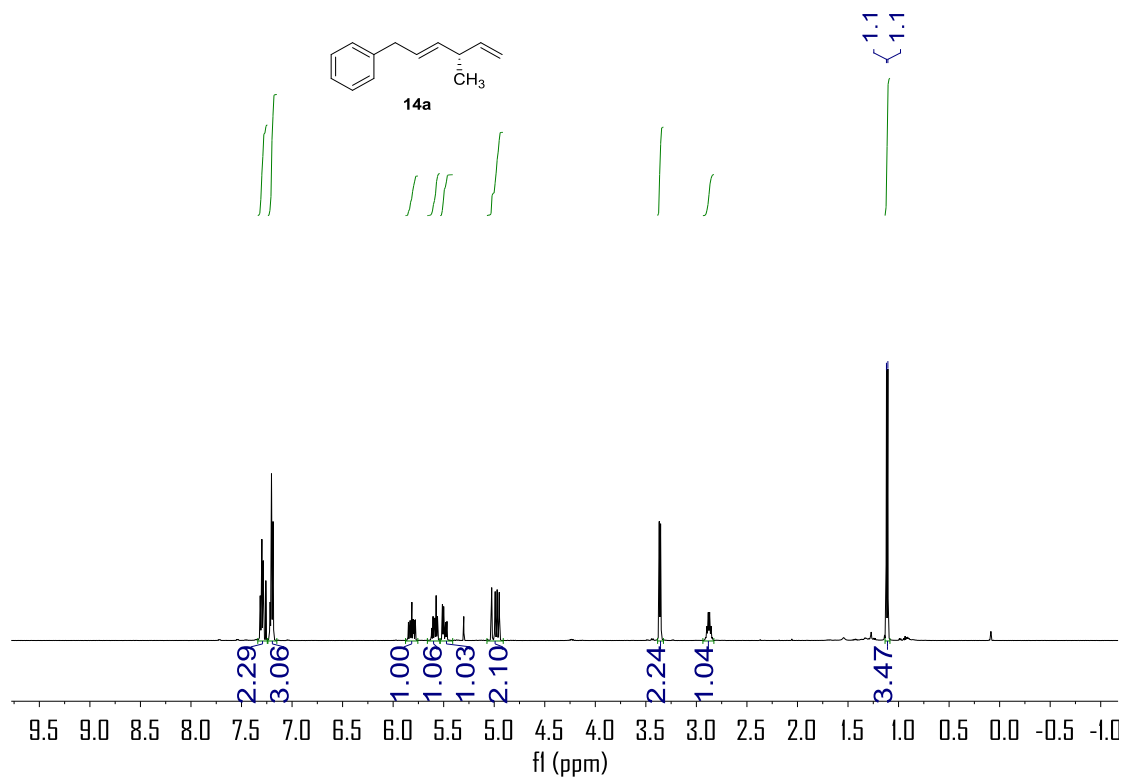

143.0  
140.9  
135.5  
128.5  
128.3  
127.8  
125.9  
112.7

40.2  
39.0

19.9

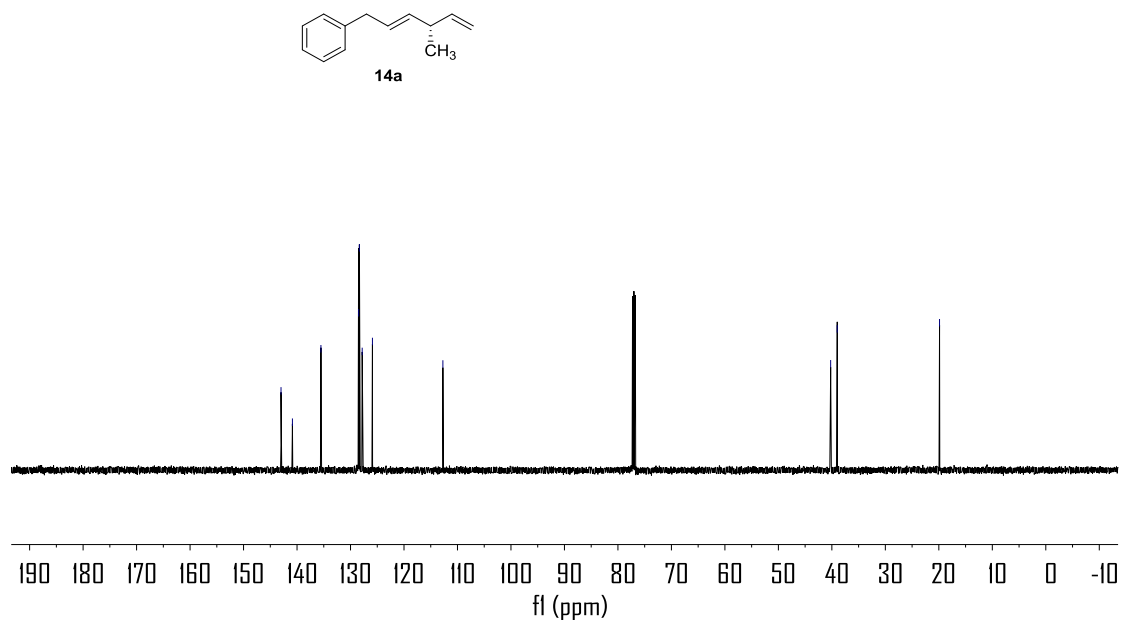

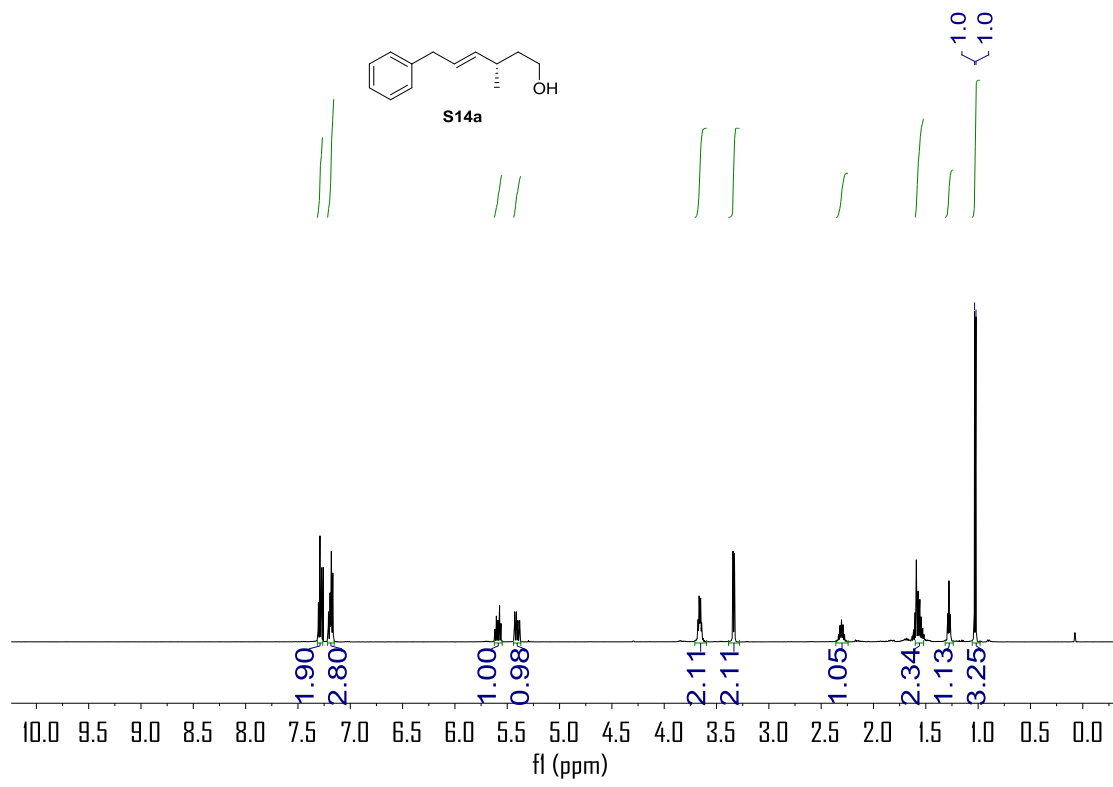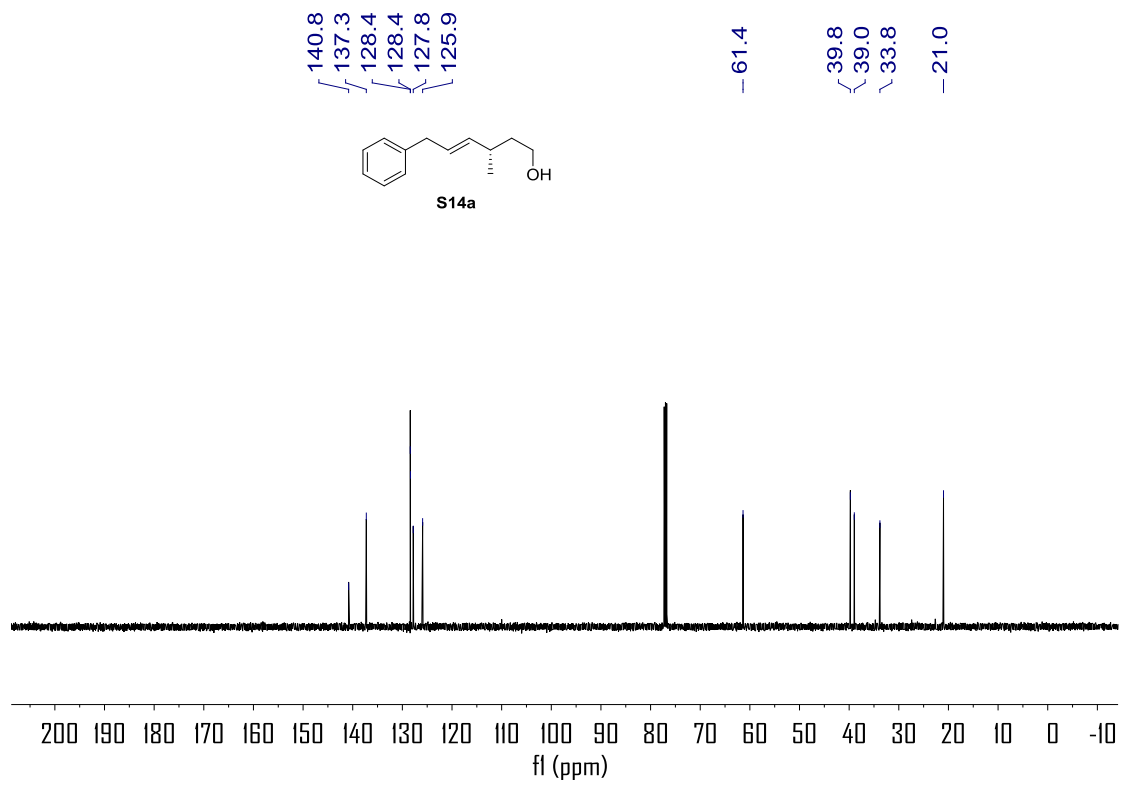

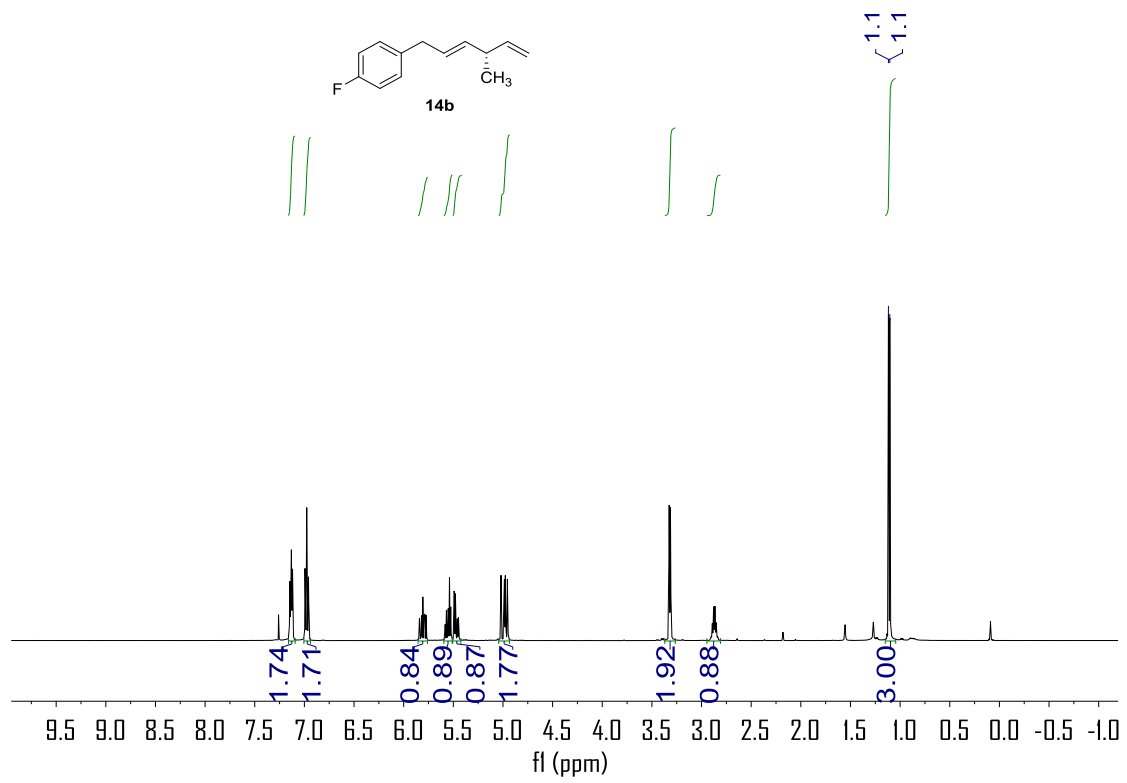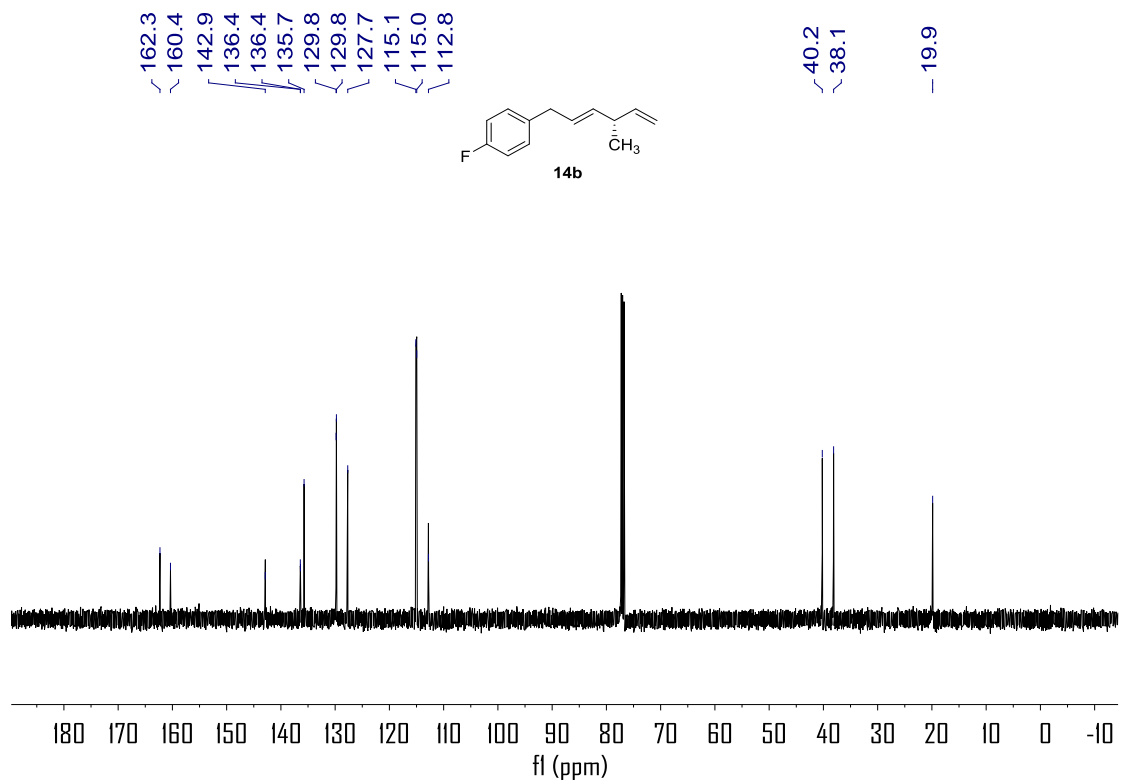

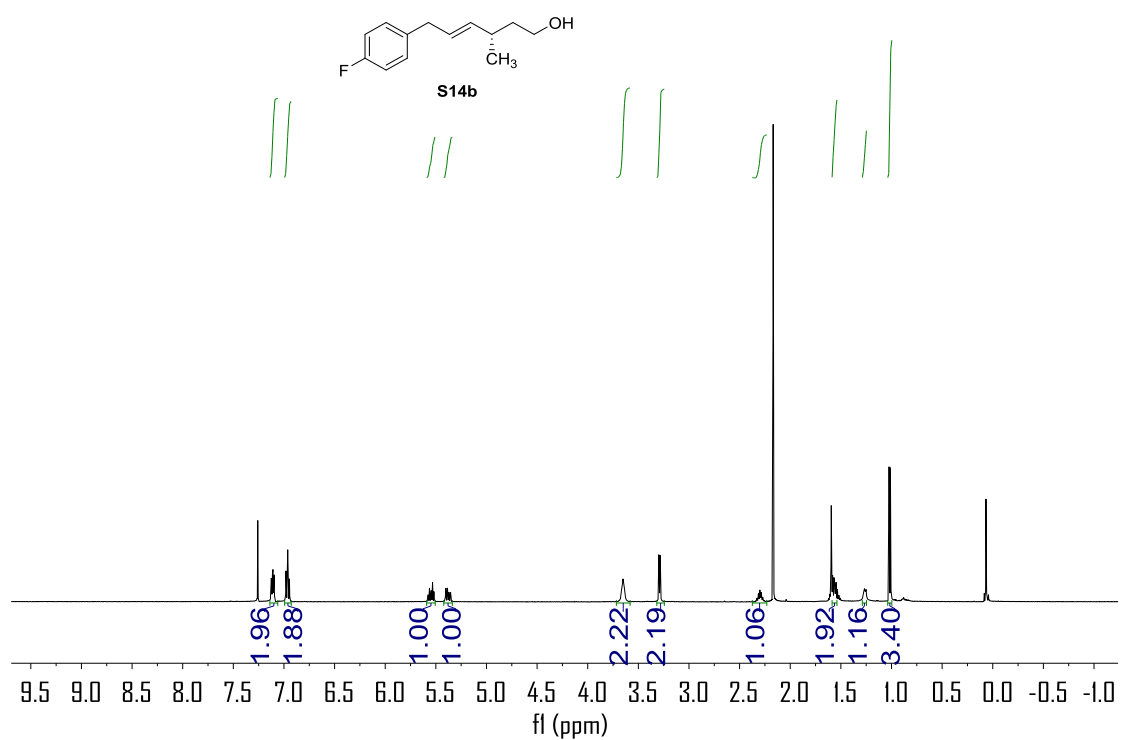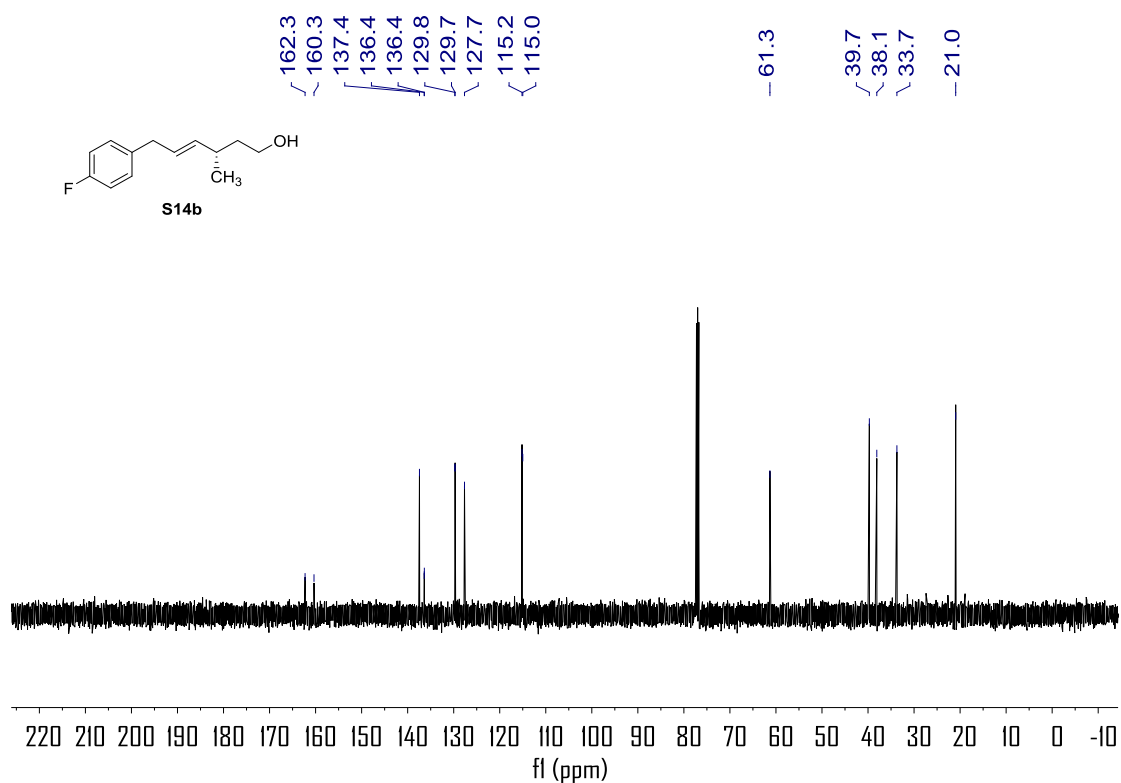

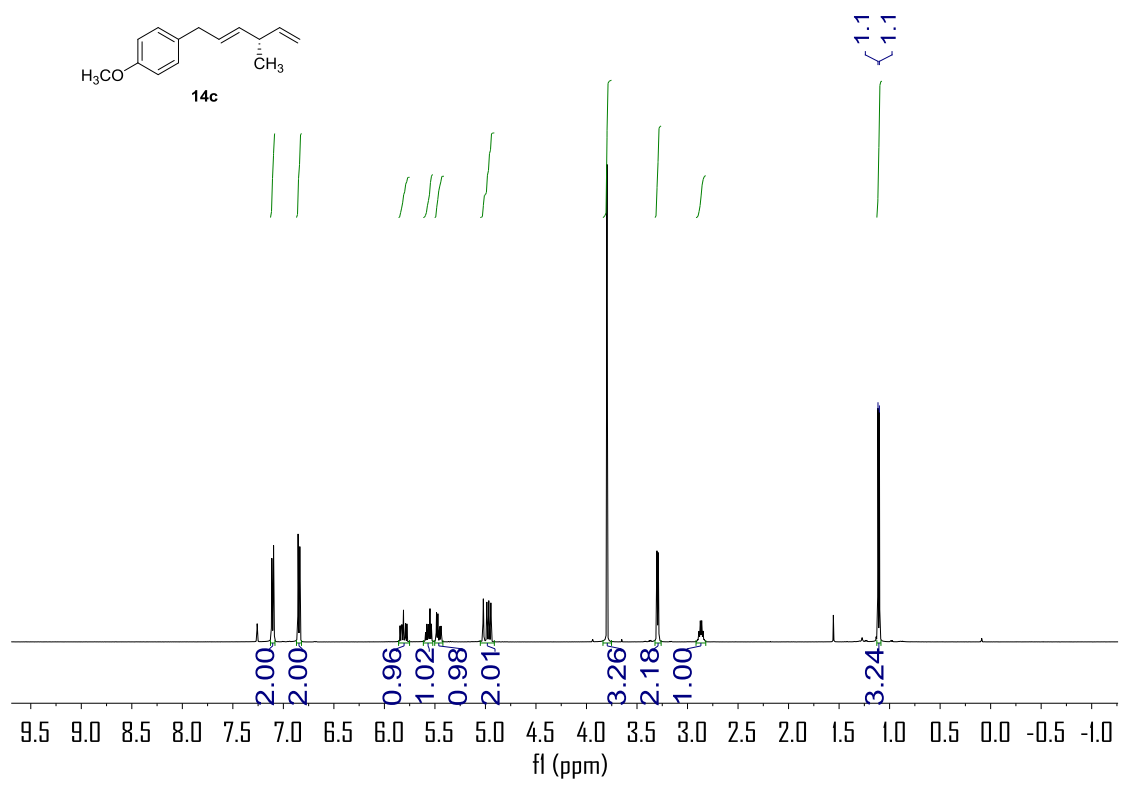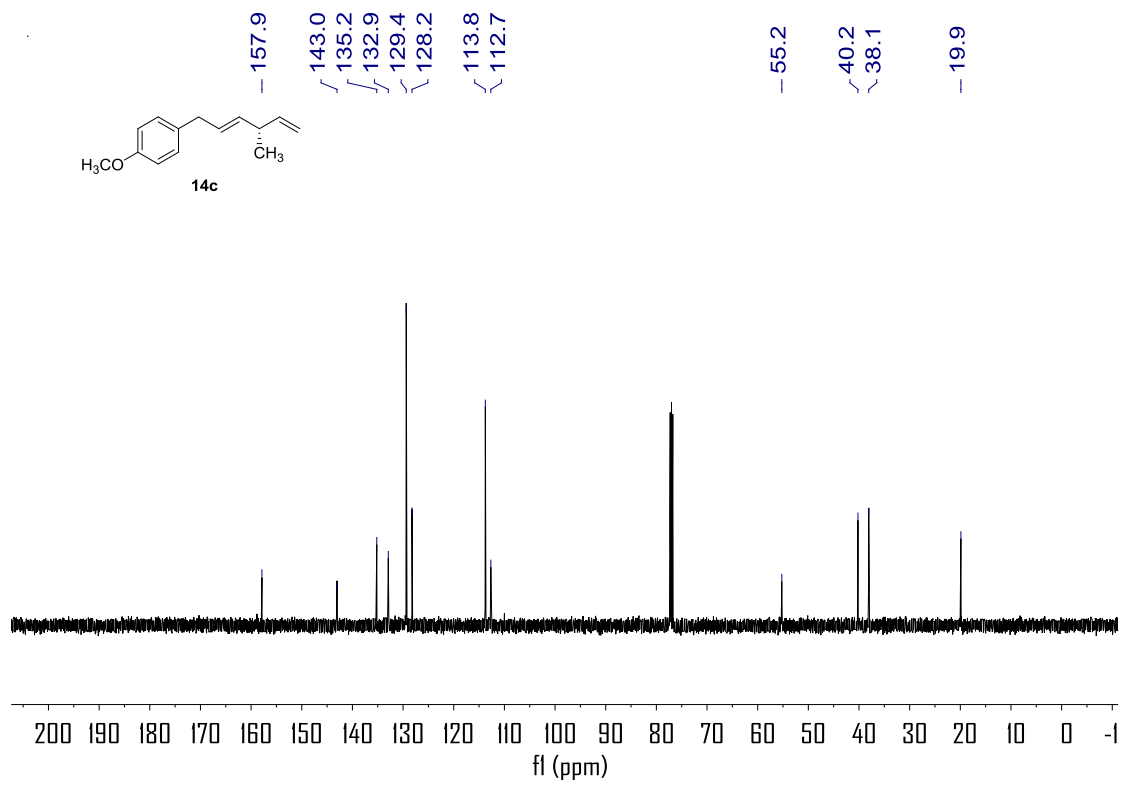

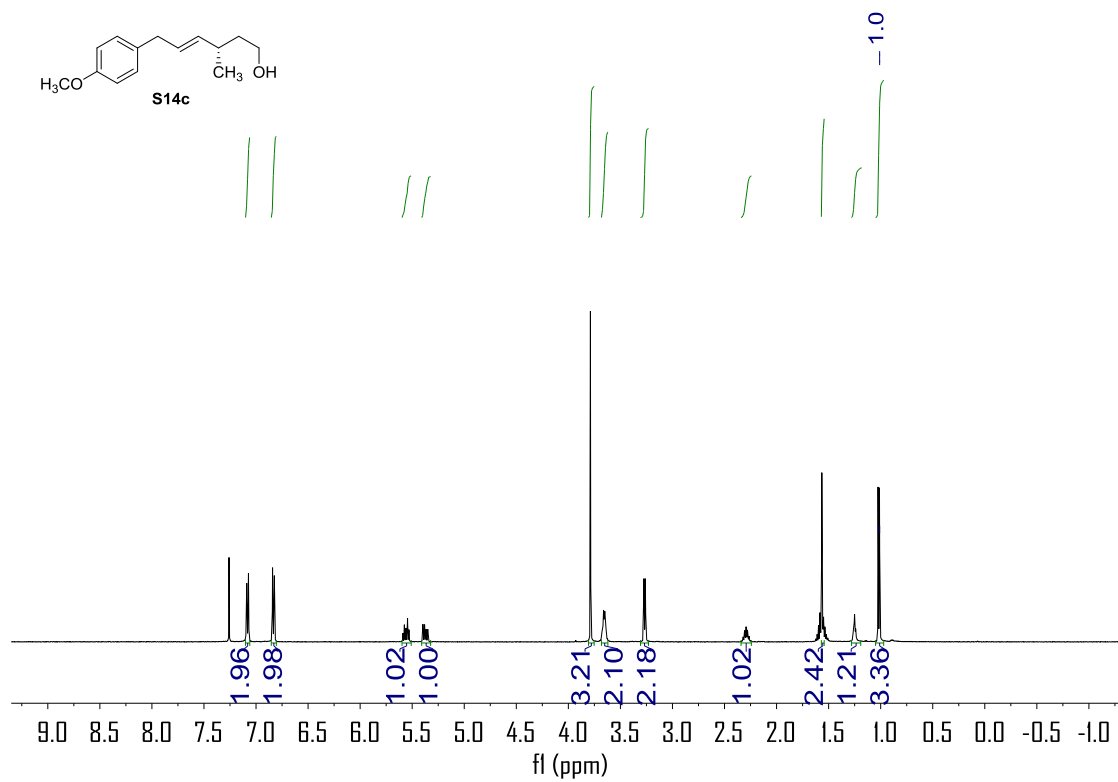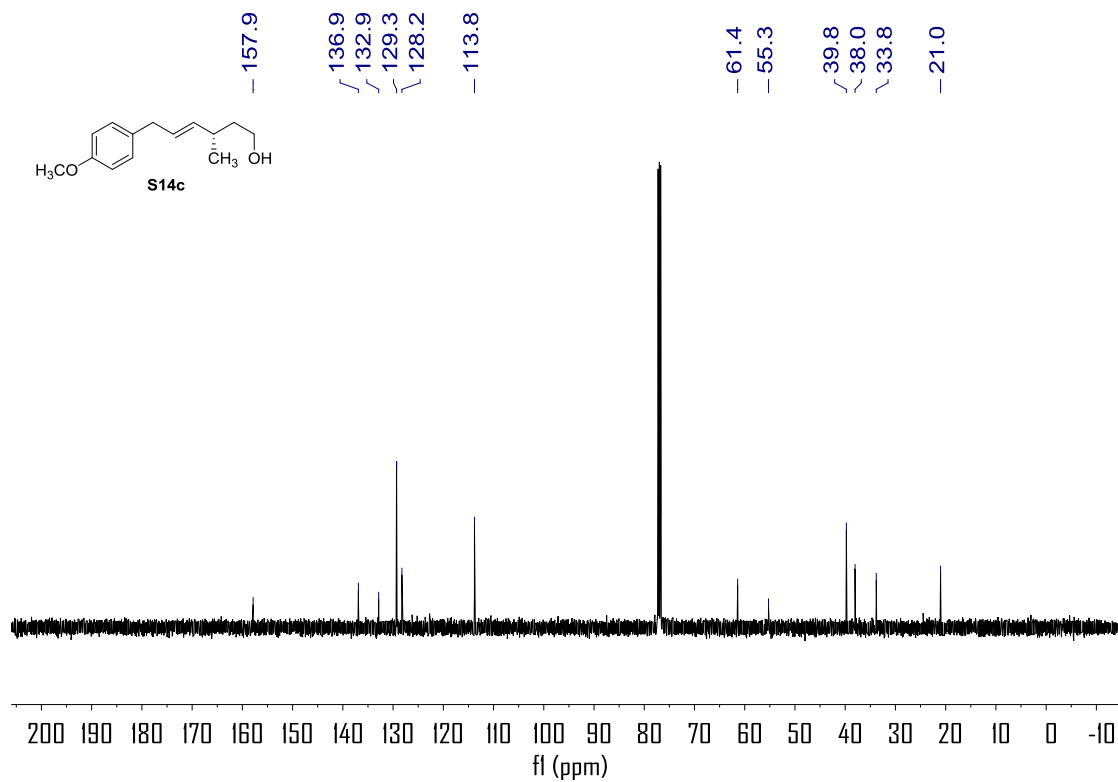



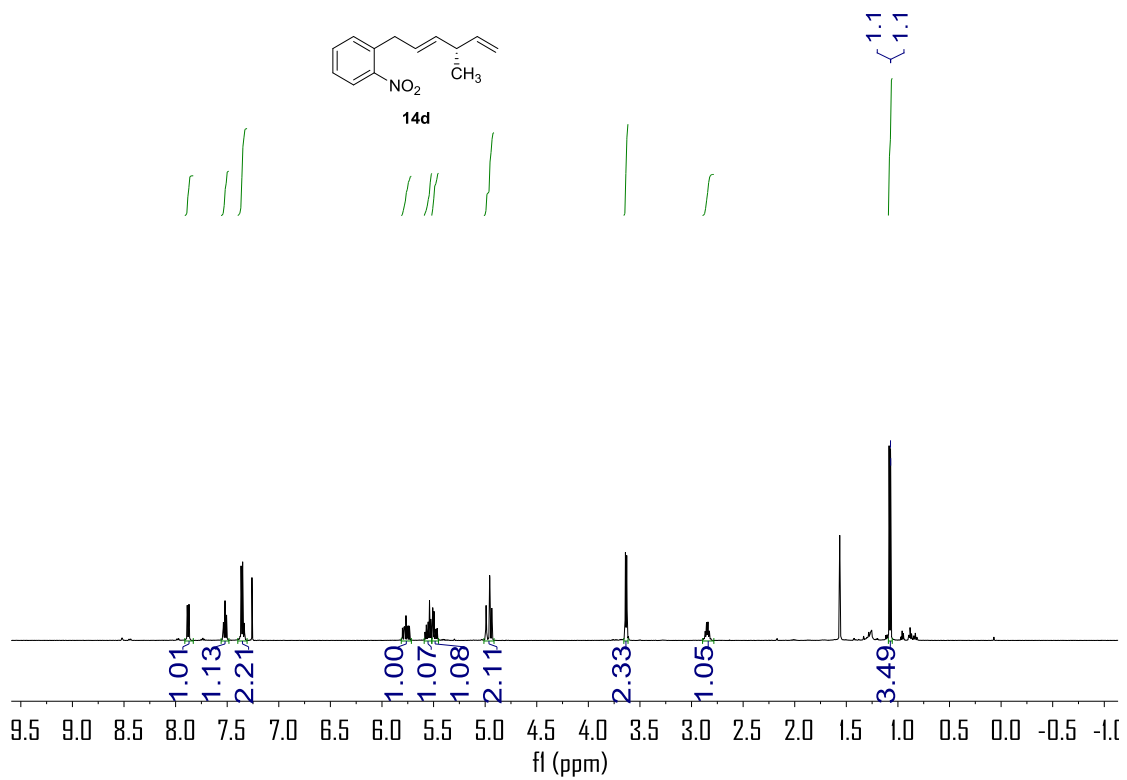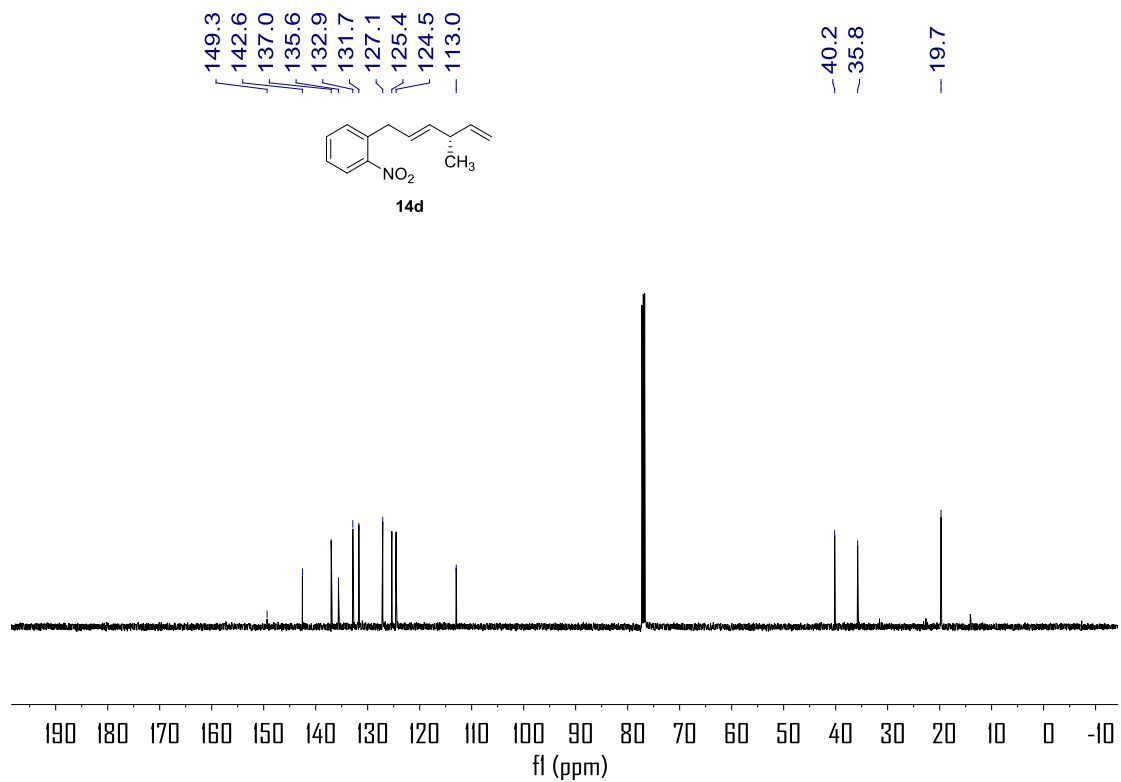

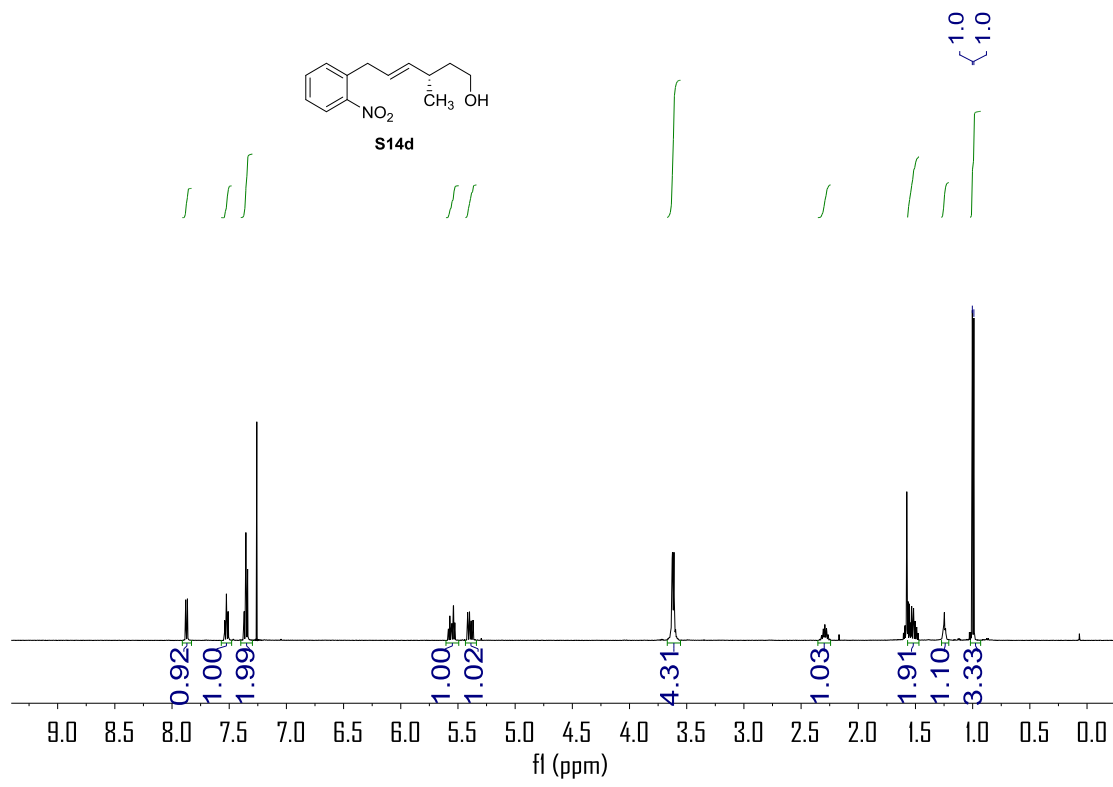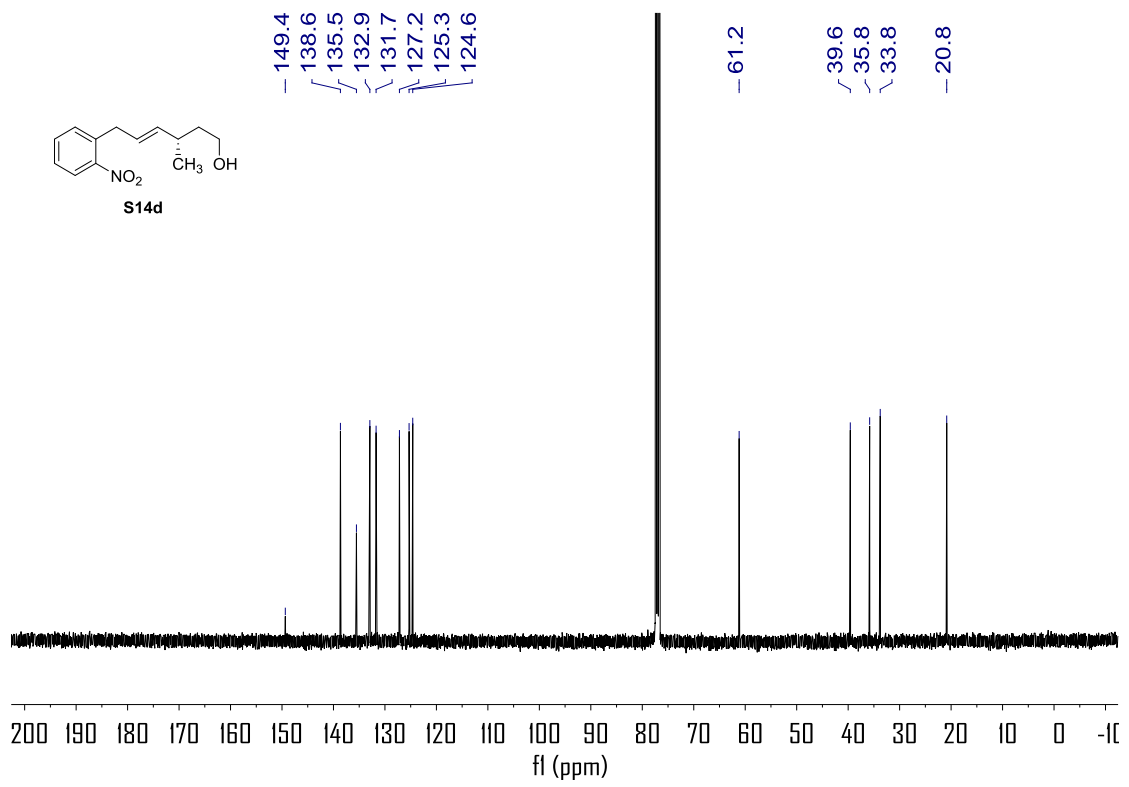

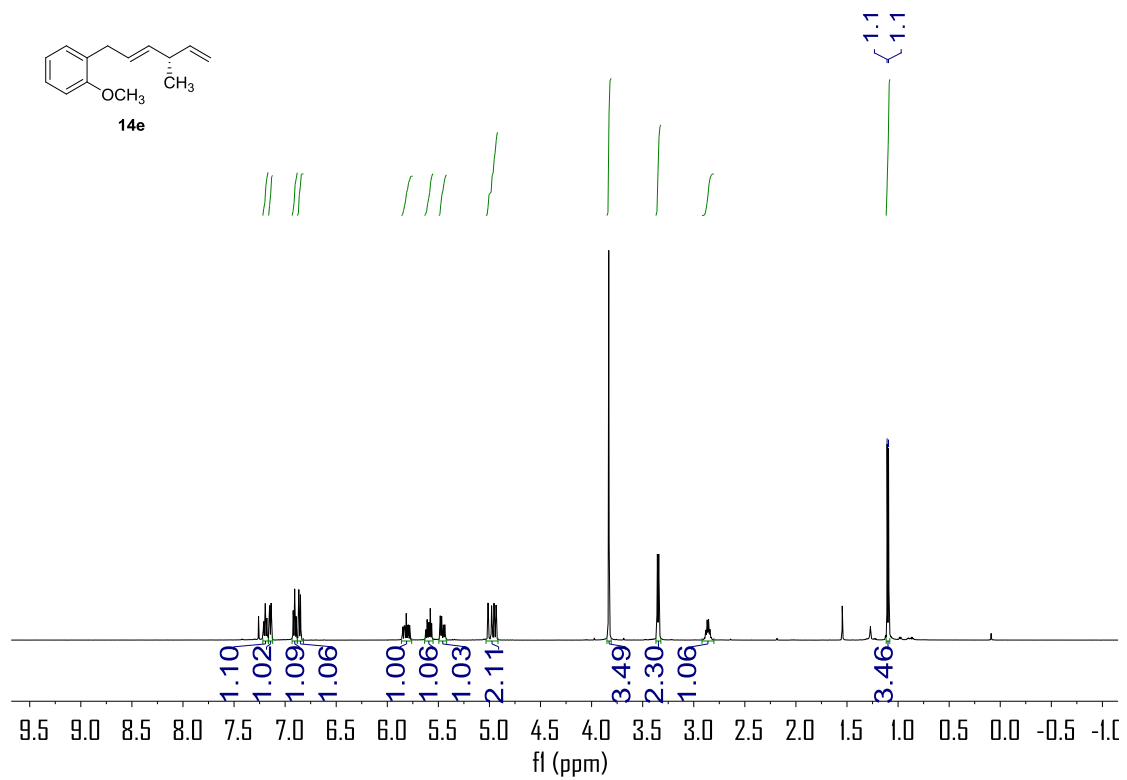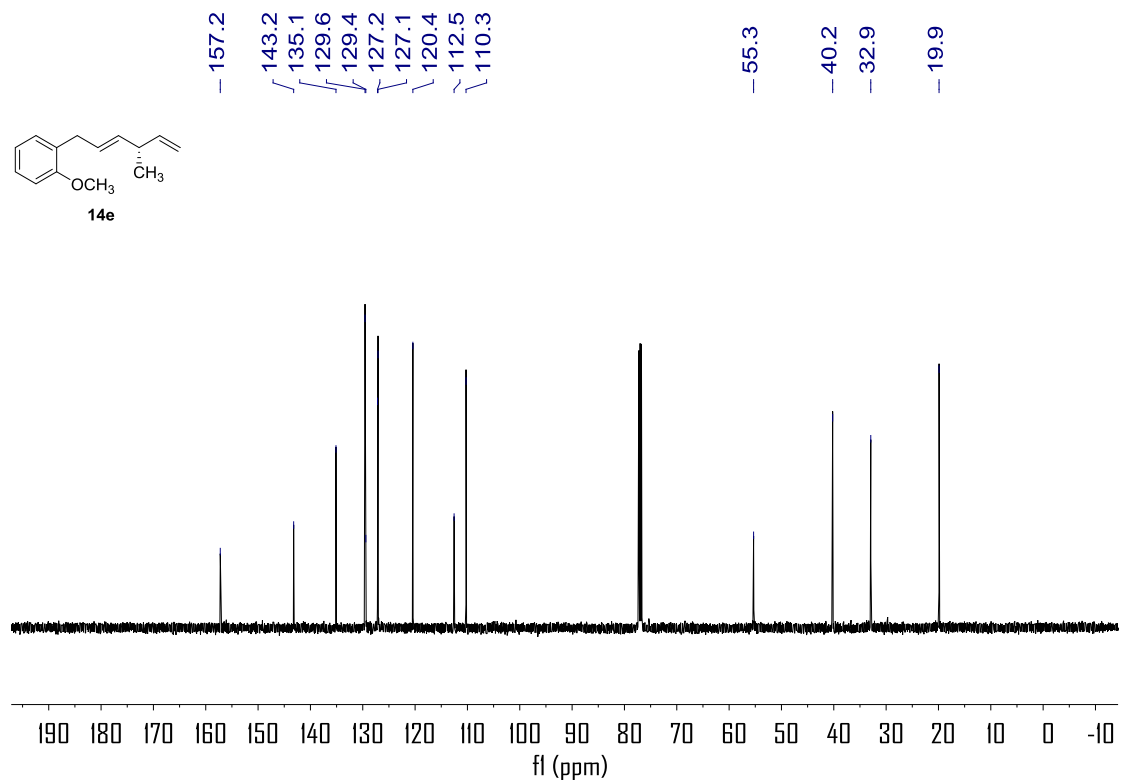

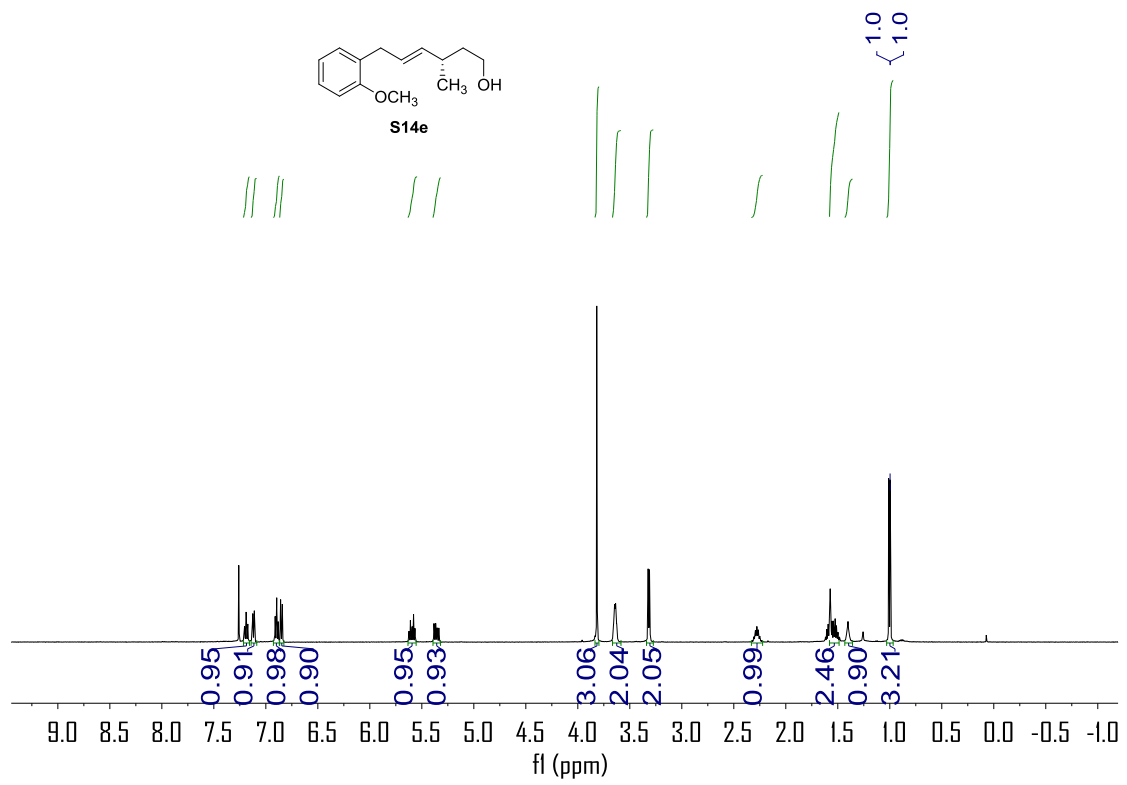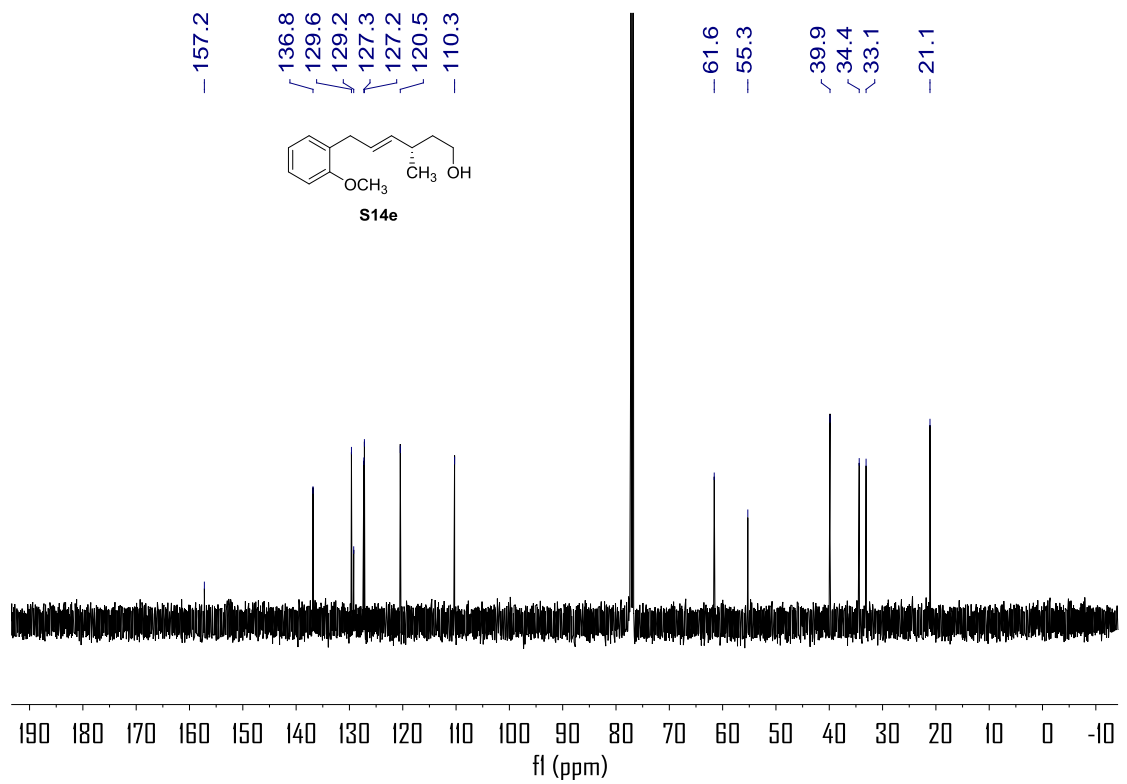

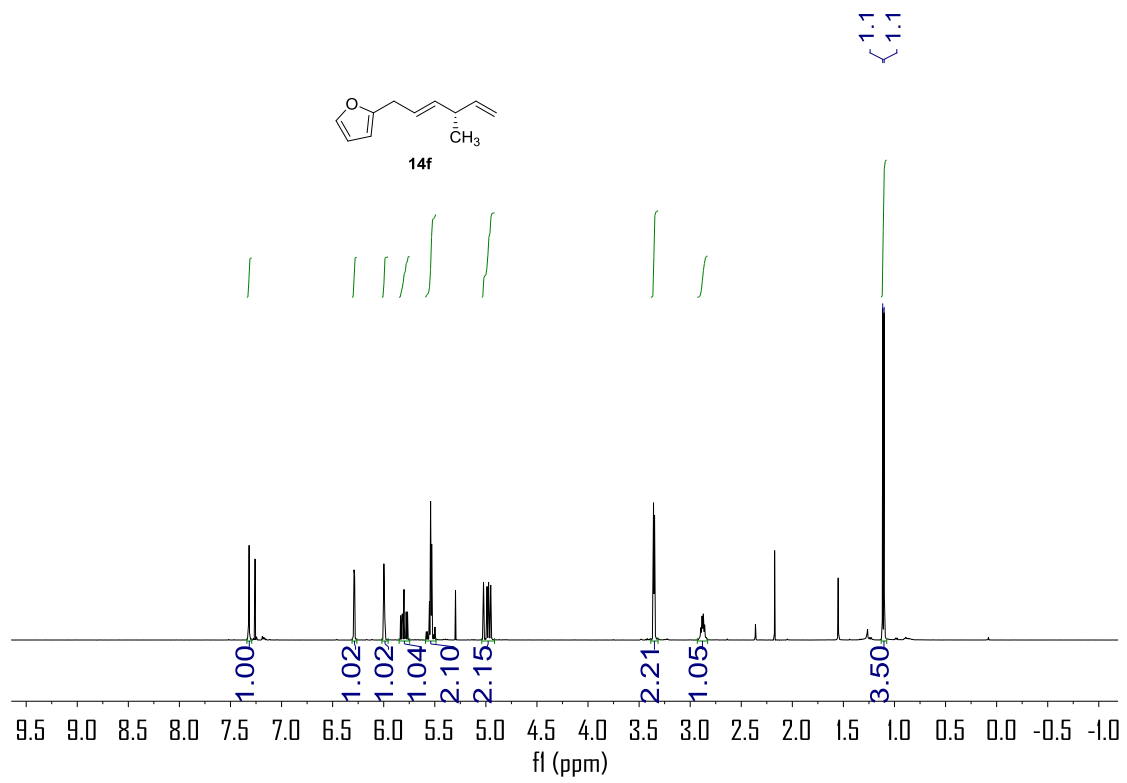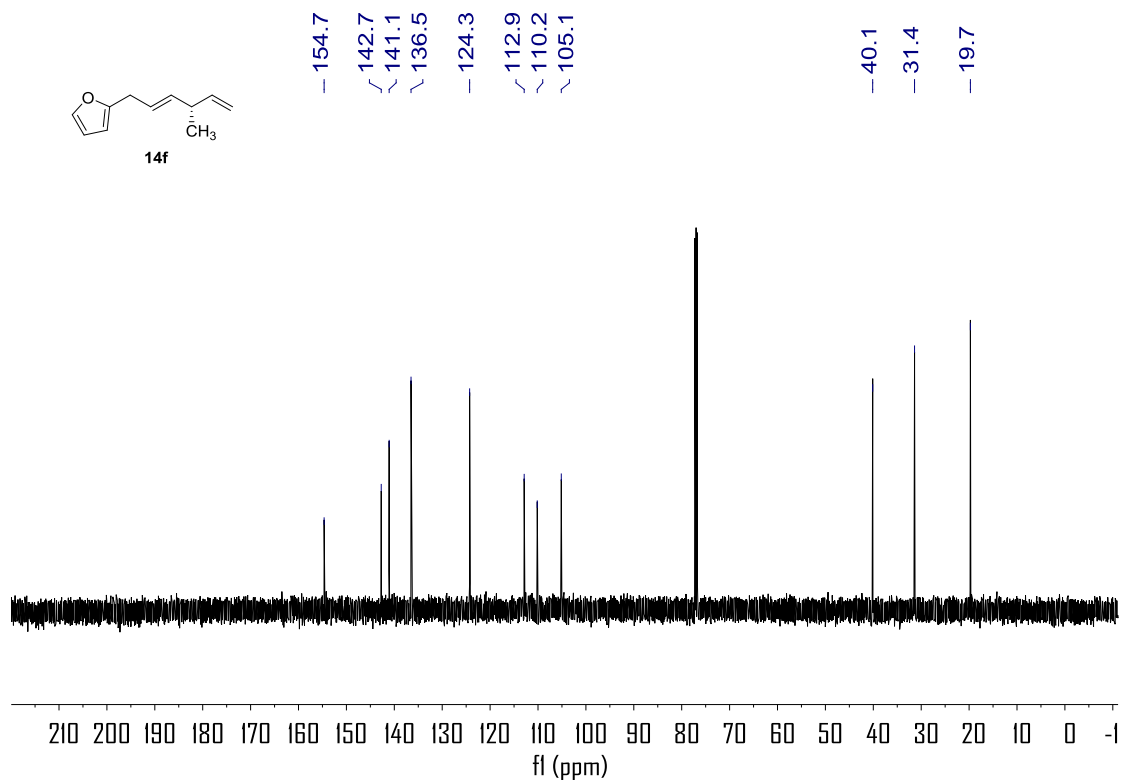

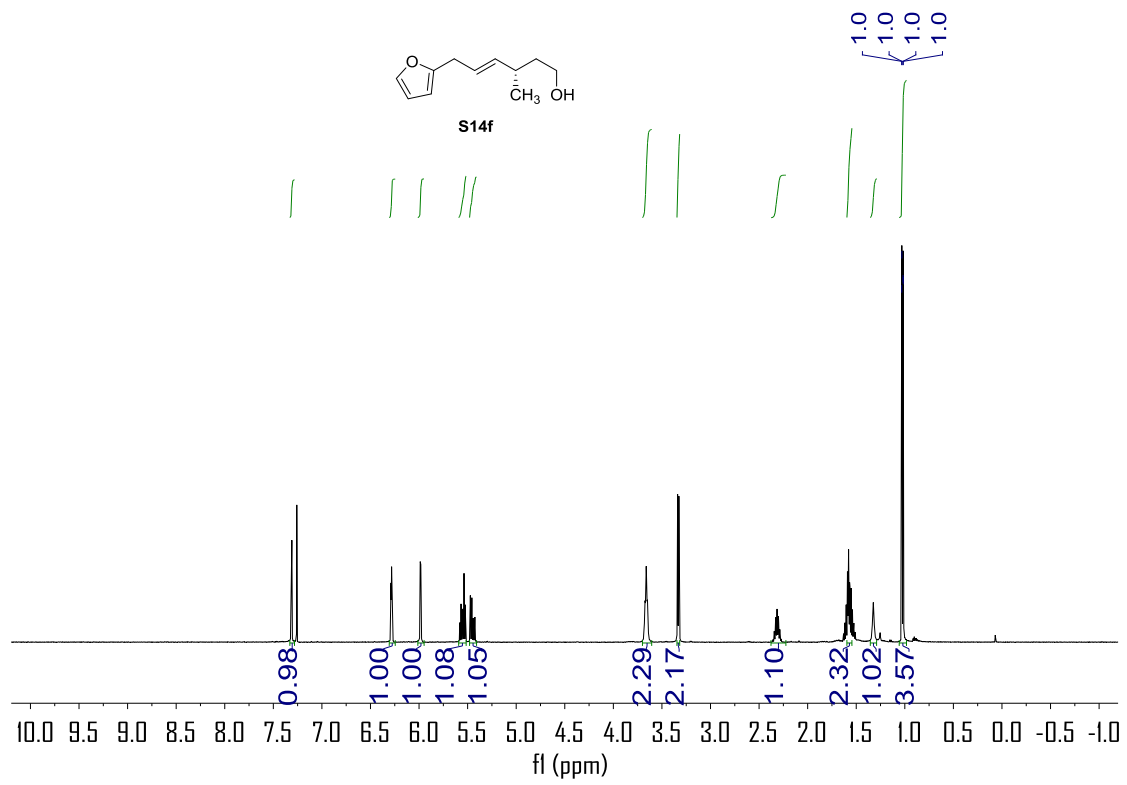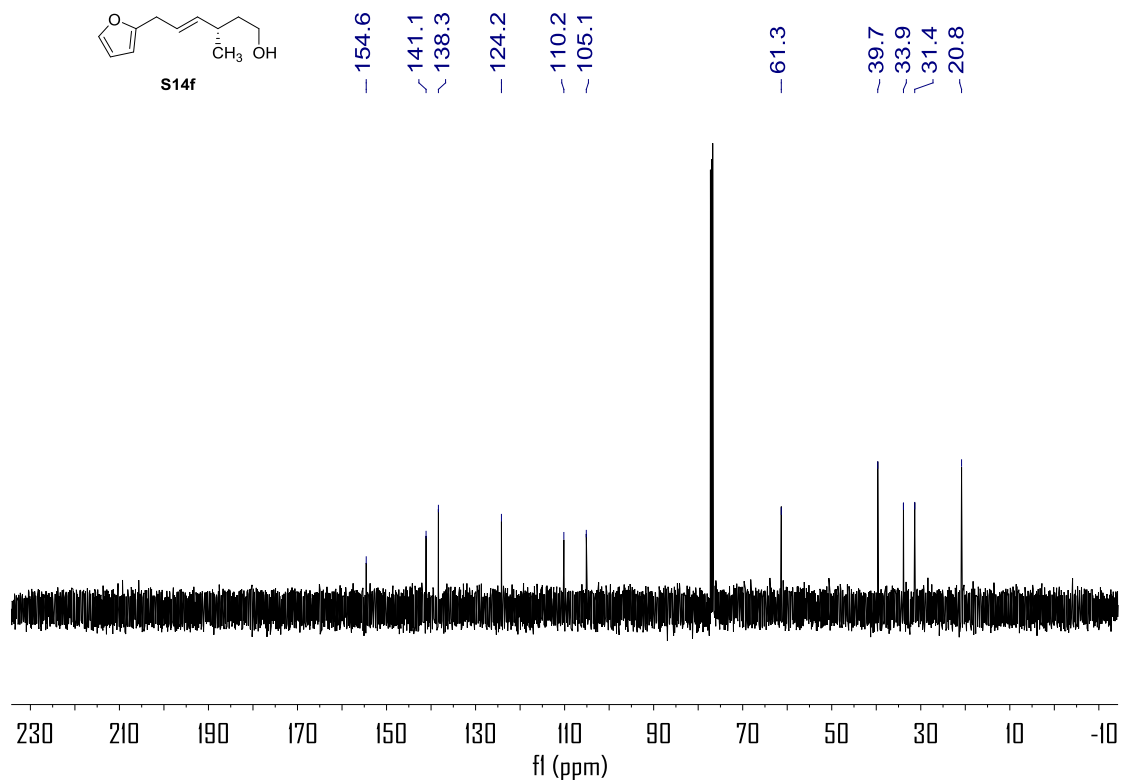

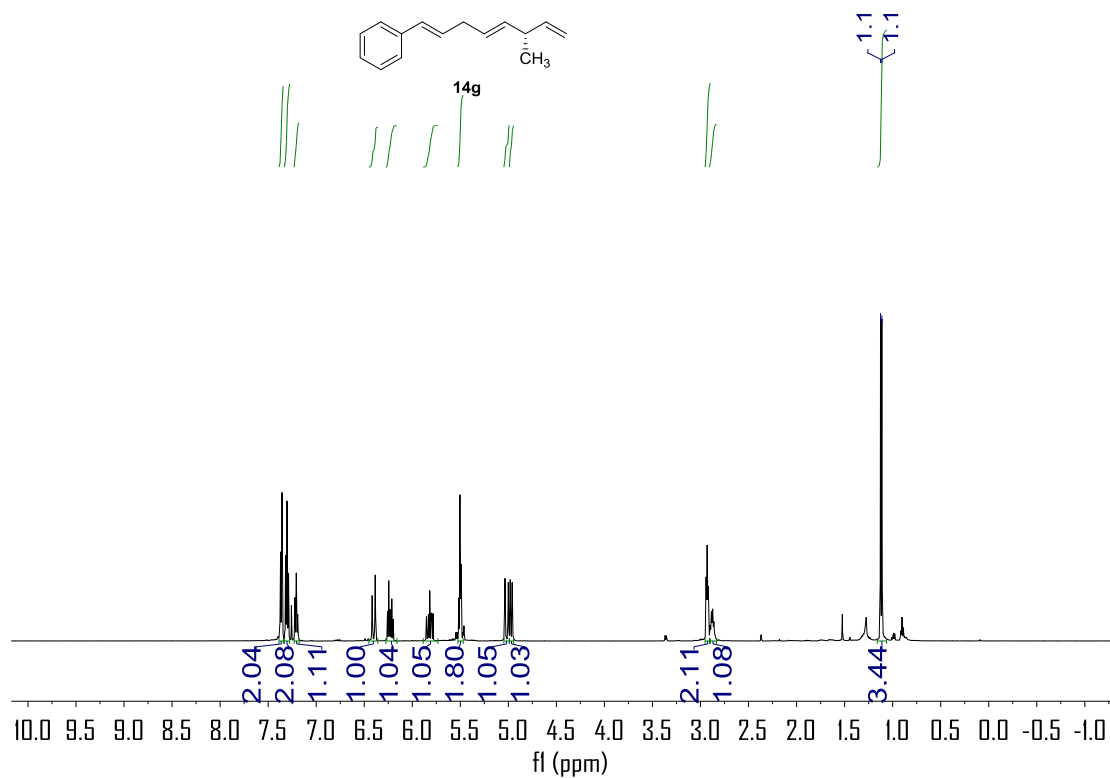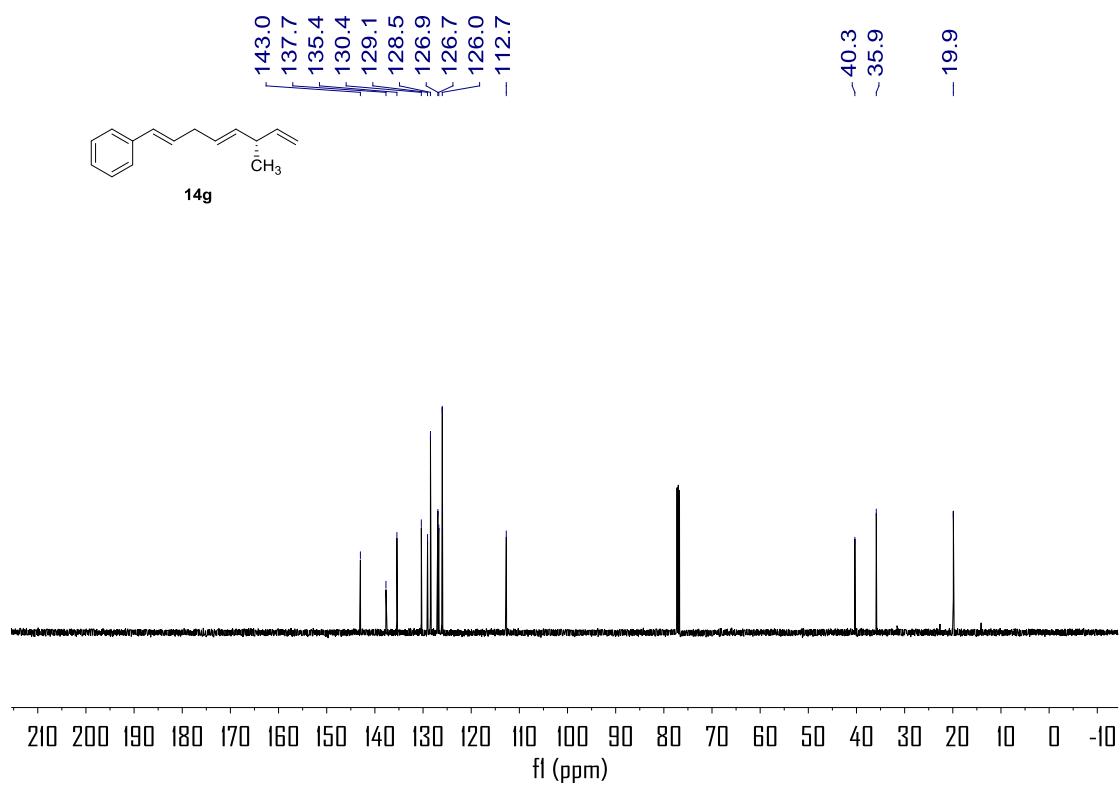

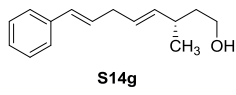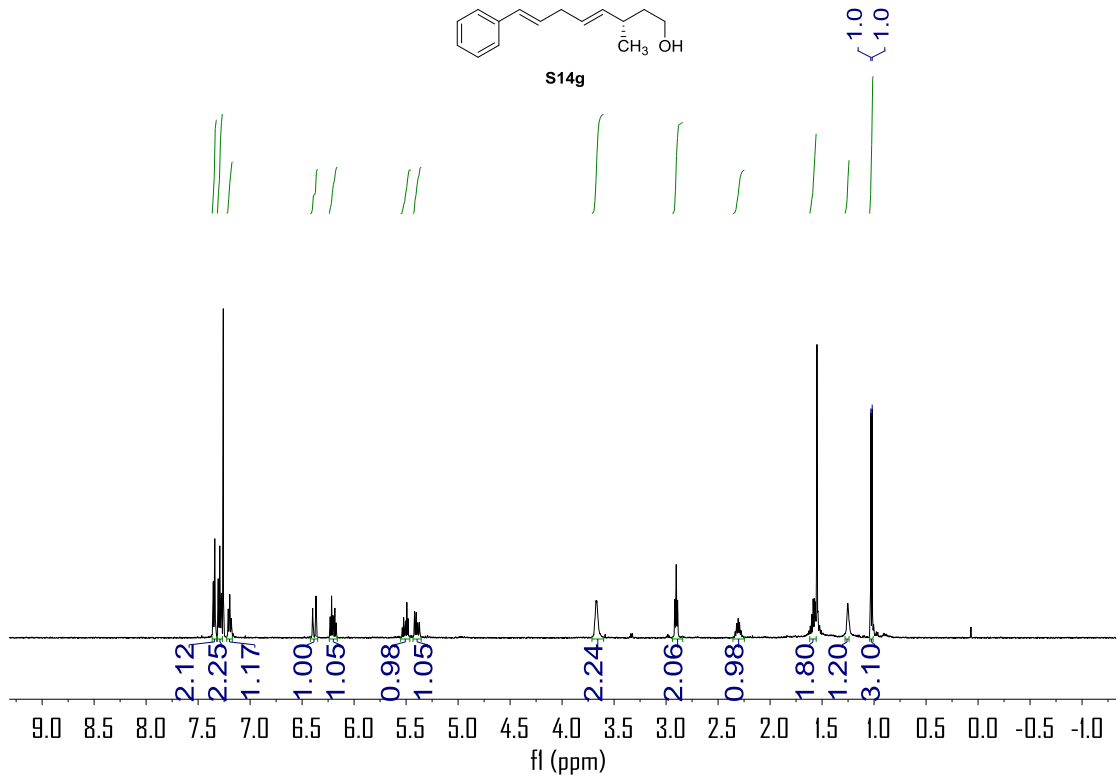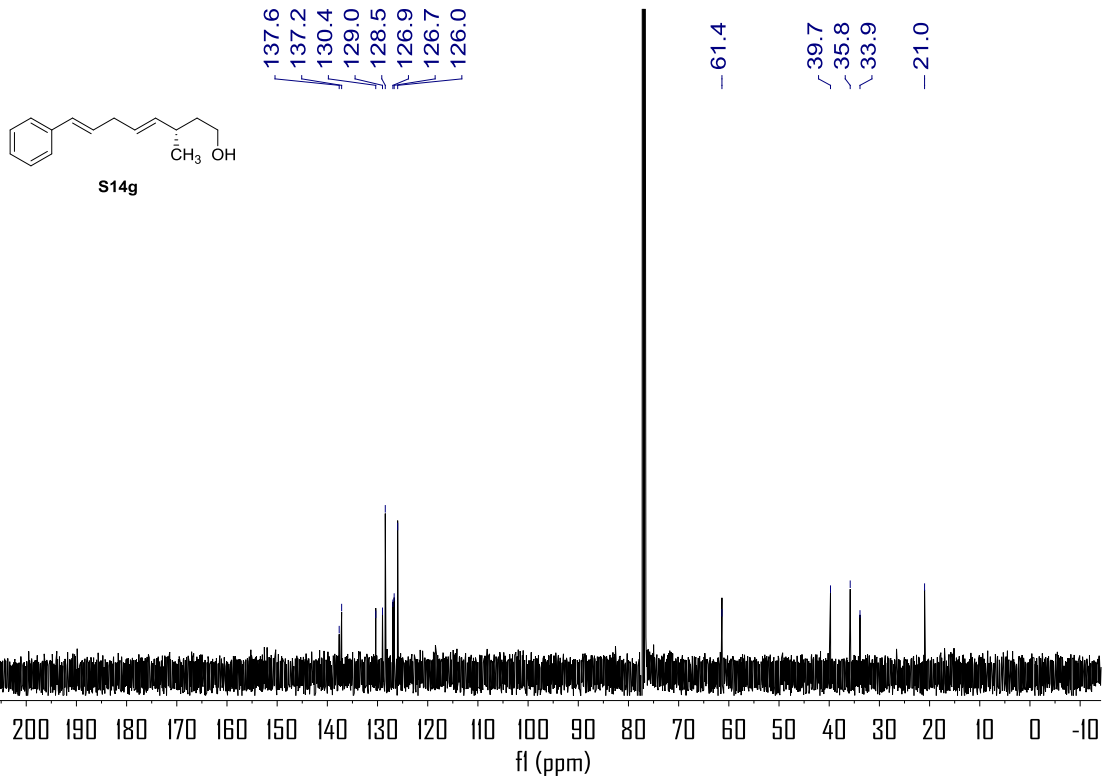



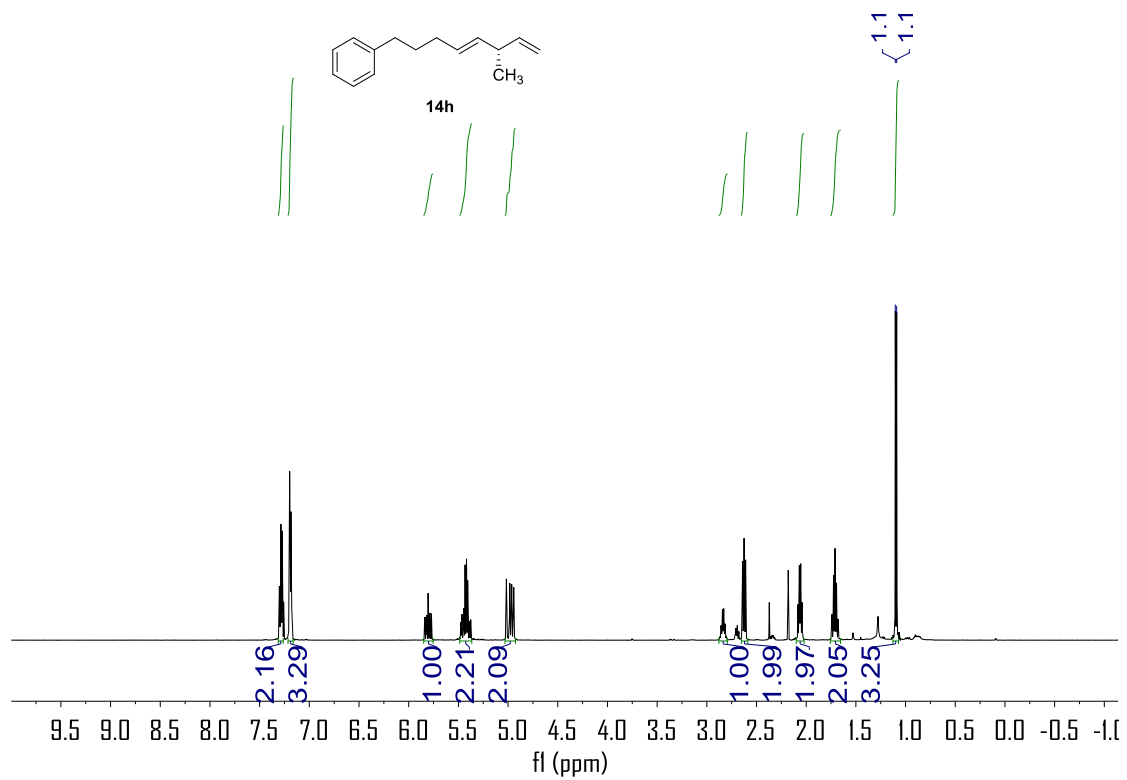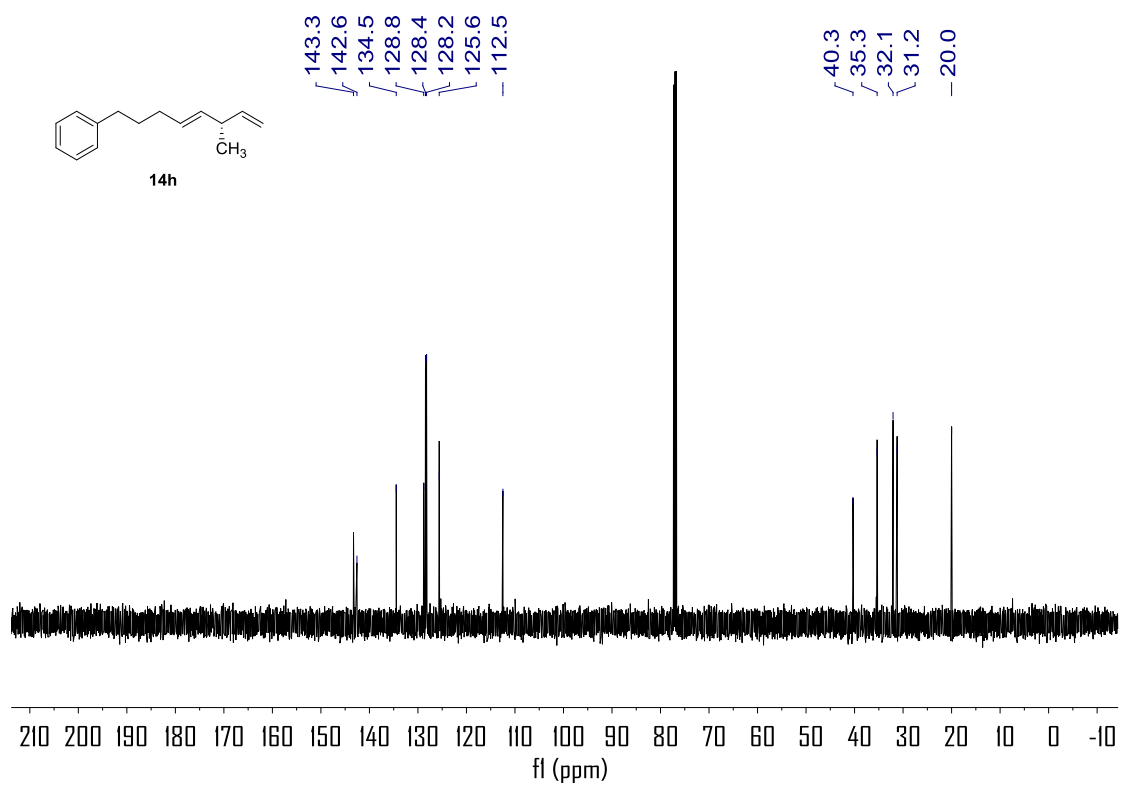

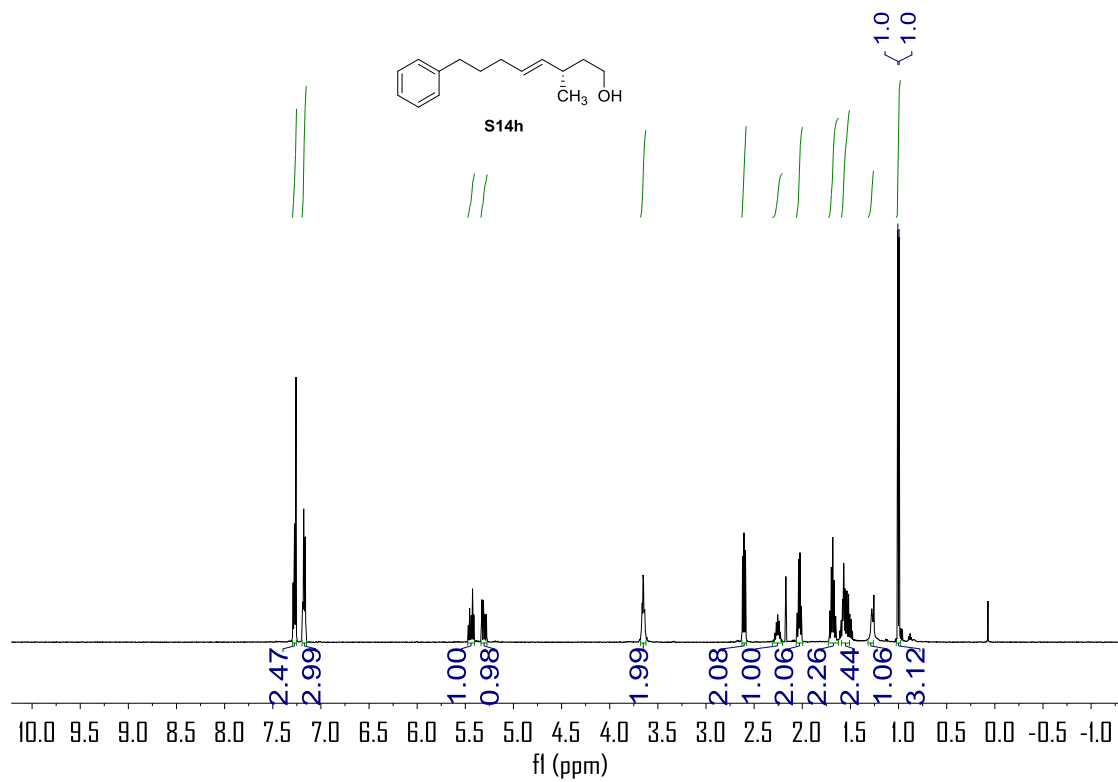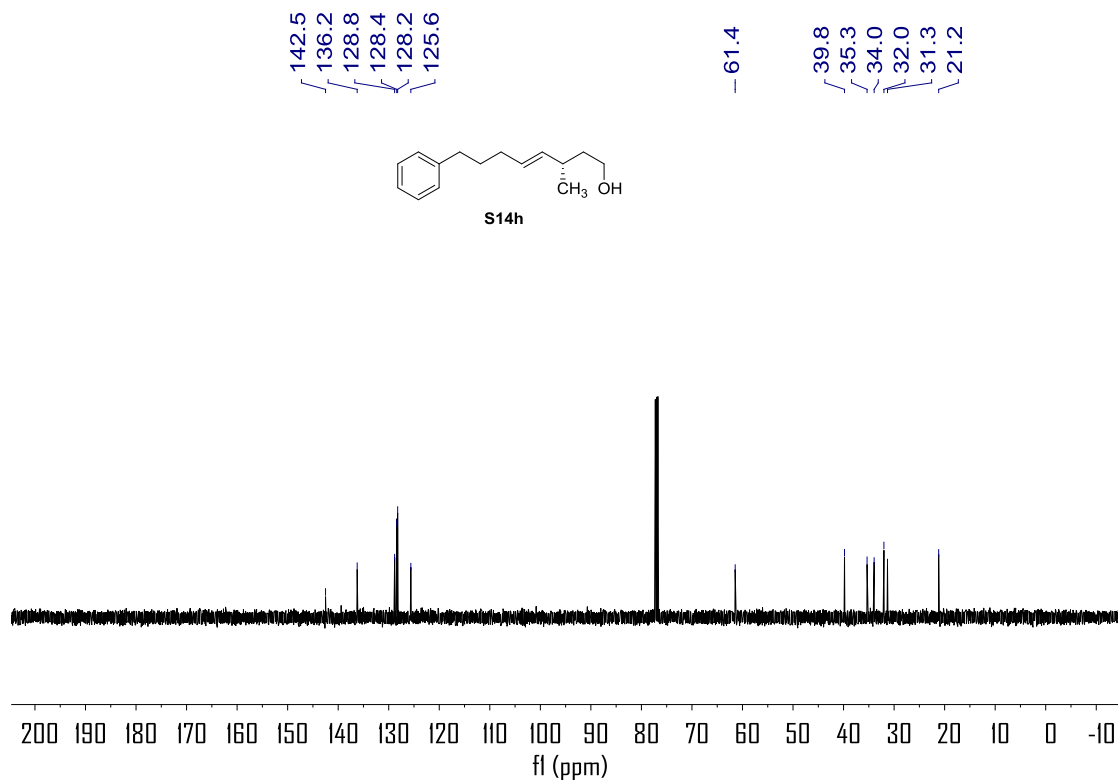

## 5. HPLC Traces

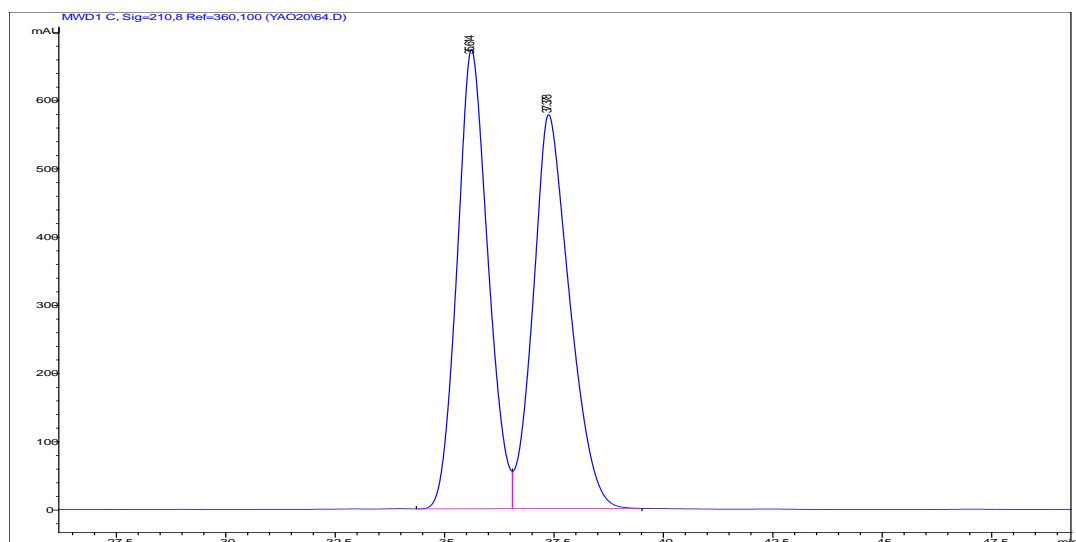

Signal 3: MWD1 C, Sig=210,8 Ref=360,100

| Peak # | RetTime [min] | Type | Width [min] | Area [mAU*s] | Height [mAU] | Area %  |
|--------|---------------|------|-------------|--------------|--------------|---------|
| 1      | 35.614        | VV   | 0.7320      | 3.31146e4    | 673.01642    | 49.6825 |
| 2      | 37.378        | VB   | 0.8454      | 3.35379e4    | 577.60913    | 50.3175 |

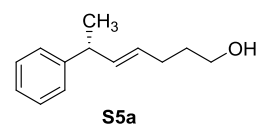

Totals : 6.66525e4 1250.62555

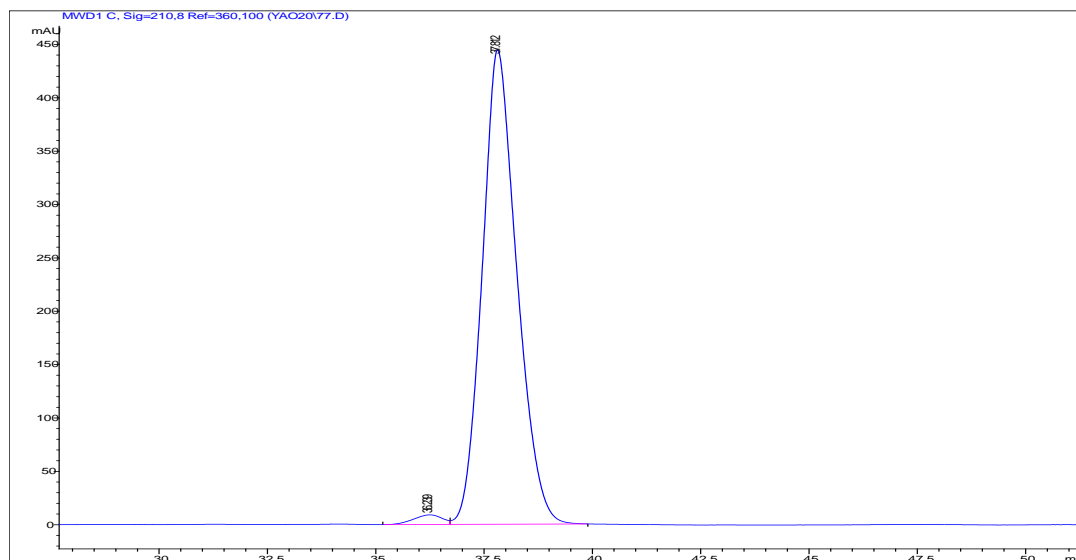

Signal 3: MWD1 C, Sig=210,8 Ref=360,100

| Peak # | RetTime [min] | Type | Width [min] | Area [mAU*s] | Height [mAU] | Area %  |
|--------|---------------|------|-------------|--------------|--------------|---------|
| 1      | 36.239        | PV   | 0.5653      | 417.83636    | 9.03895      | 1.6603  |
| 2      | 37.812        | VB   | 0.8195      | 2.47491e4    | 444.58871    | 98.3397 |

Totals : 2.51669e4 453.62767  
S107

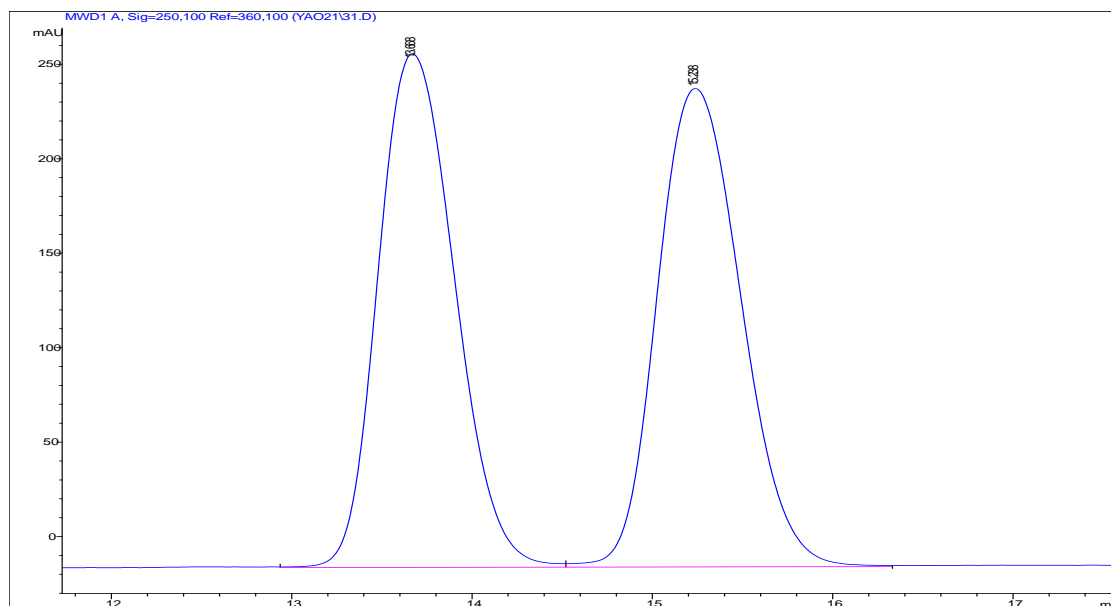

Signal 1: MWD1 A, Sig=250,100 Ref=360,100

| Peak #   | RetTime [min] | Type | Width [min] | Area [mAU*s] | Height [mAU] | Area %  |
|----------|---------------|------|-------------|--------------|--------------|---------|
| 1        | 13.668        | VV   | 0.4636      | 8011.33447   | 271.99335    | 49.4931 |
| 2        | 15.238        | VV   | 0.5146      | 8175.44287   | 253.24960    | 50.5069 |
| Totals : |               |      |             | 1.61868e4    | 525.24295    |         |

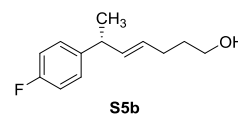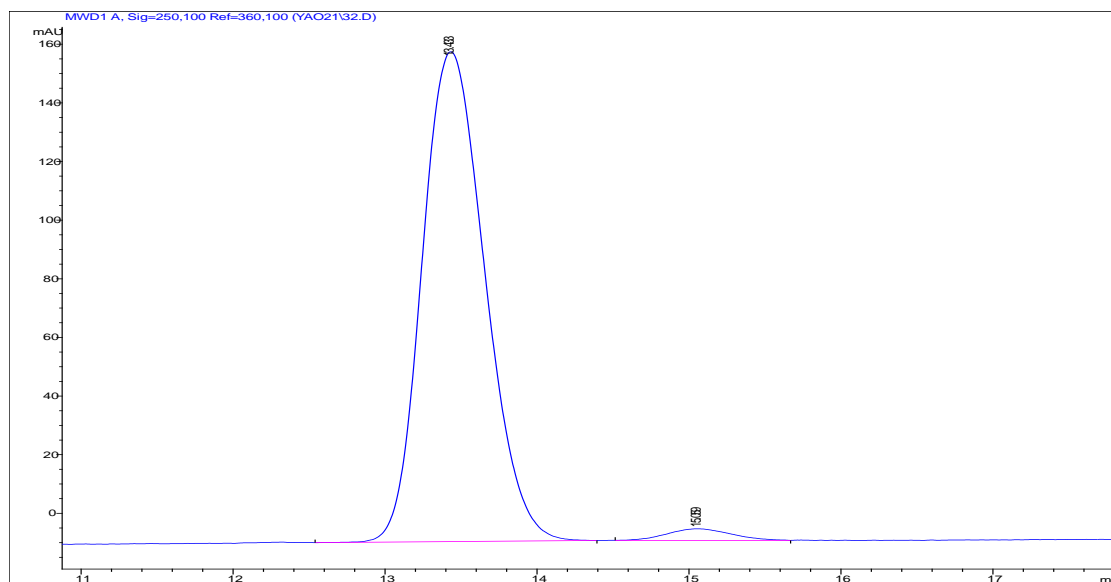

Signal 1: MWD1 A, Sig=250,100 Ref=360,100

| Peak #   | RetTime [min] | Type | Width [min] | Area [mAU*s] | Height [mAU] | Area %  |
|----------|---------------|------|-------------|--------------|--------------|---------|
| 1        | 13.433        | VB   | 0.4560      | 4784.17969   | 167.10588    | 97.6175 |
| 2        | 15.059        | BV   | 0.3609      | 116.76463    | 3.97317      | 2.3825  |
| Totals : |               |      |             | 4900.94432   | 171.07905    |         |

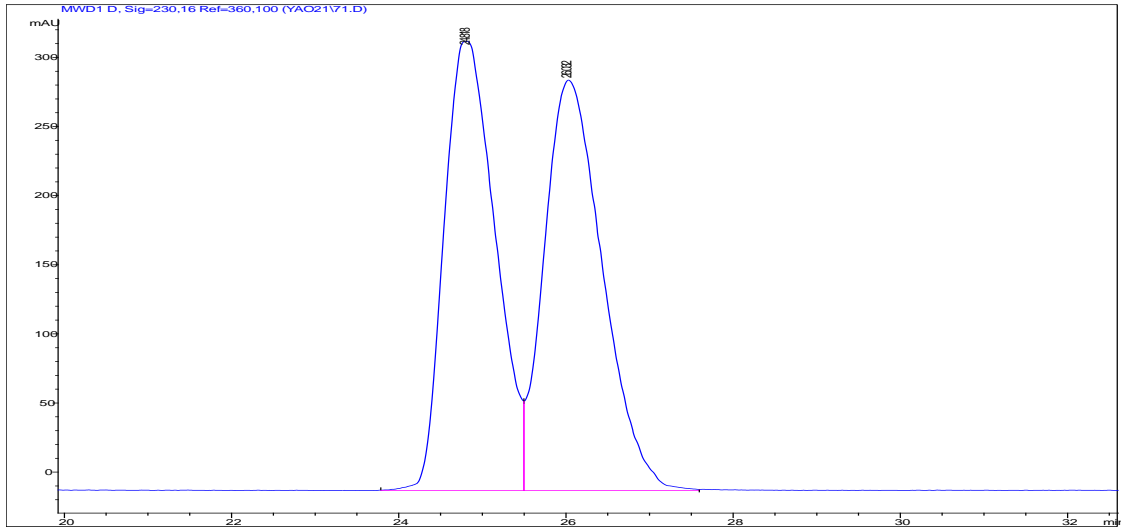

Signal 4: MWD1 D, Sig=230,16 Ref=360,100

| Peak #   | RetTime [min] | Type | Width [min] | Area [mAU*s] | Height [mAU] | Area %  |
|----------|---------------|------|-------------|--------------|--------------|---------|
| 1        | 24.818        | VV   | 0.5269      | 1.38403e4    | 324.92722    | 48.9535 |
| 2        | 26.032        | VV   | 0.6450      | 1.44320e4    | 296.96225    | 51.0465 |
| Totals : |               |      |             | 2.82723e4    | 621.88947    |         |

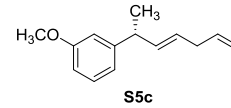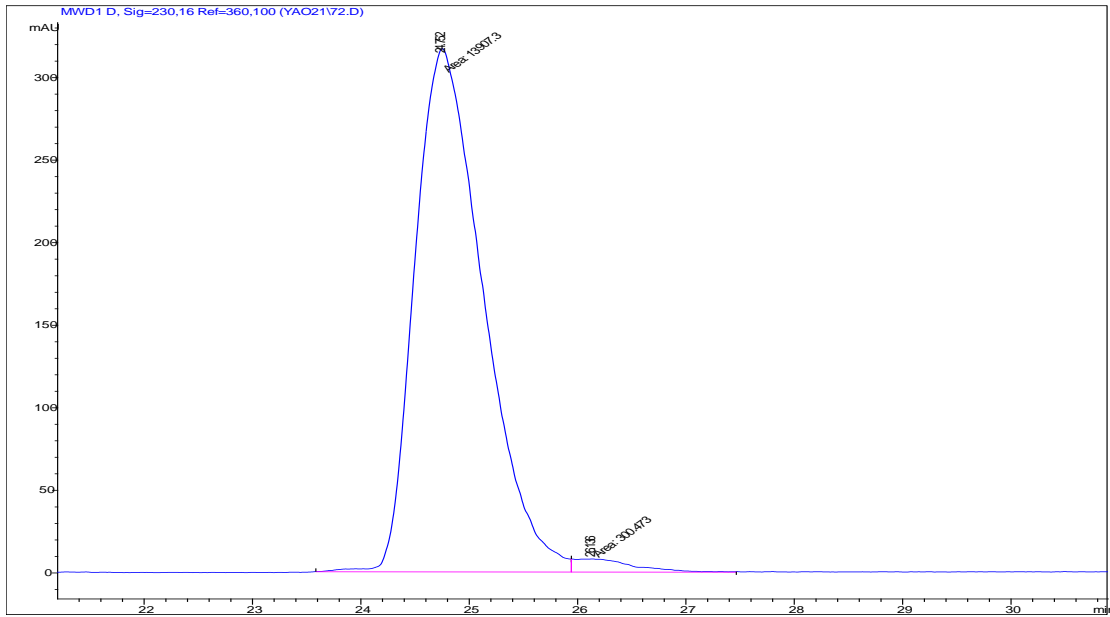

Signal 4: MWD1 D, Sig=230,16 Ref=360,100

| Peak #   | RetTime [min] | Type | Width [min] | Area [mAU*s] | Height [mAU] | Area %  |
|----------|---------------|------|-------------|--------------|--------------|---------|
| 1        | 24.752        | MF   | 0.7313      | 1.39073e4    | 316.96719    | 97.8852 |
| 2        | 26.136        | FM   | 0.6289      | 300.47311    | 7.96334      | 2.1148  |
| Totals : |               |      |             | 1.42078e4    | 324.93053    |         |

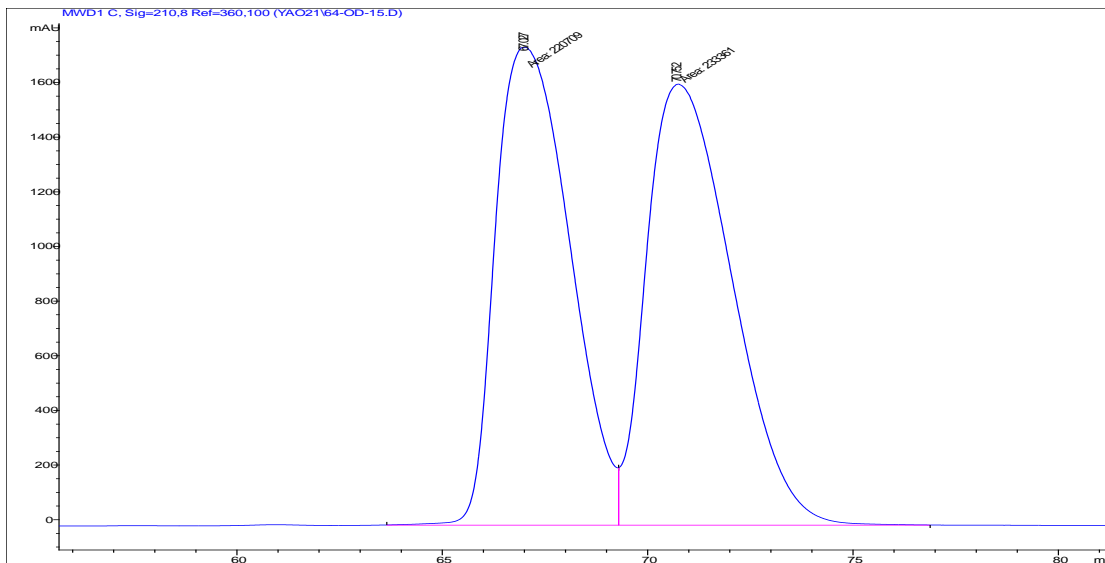

Signal 3: MWD1 C, Sig=210,8 Ref=360,100

| Peak #   | RetTime [min] | Type | Width [min] | Area [mAU*s] | Height [mAU] | Area %  |
|----------|---------------|------|-------------|--------------|--------------|---------|
| 1        | 67.027        | MF   | 2.1039      | 2.20709e5    | 1748.44641   | 48.6068 |
| 2        | 70.752        | FM   | 2.4098      | 2.33361e5    | 1613.98328   | 51.3932 |
| Totals : |               |      |             | 4.54071e5    | 3362.42969   |         |

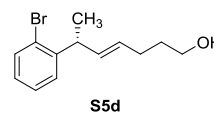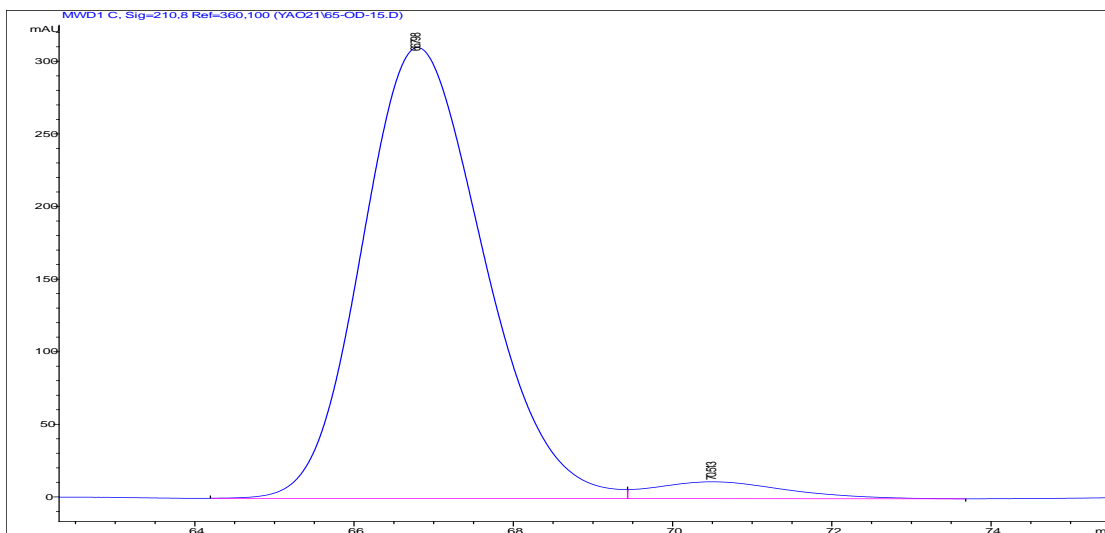

Signal 3: MWD1 C, Sig=210,8 Ref=360,100

| Peak #   | RetTime [min] | Type | Width [min] | Area [mAU*s] | Height [mAU] | Area %  |
|----------|---------------|------|-------------|--------------|--------------|---------|
| 1        | 66.798        | BV   | 1.5778      | 3.27920e4    | 310.58850    | 96.0518 |
| 2        | 70.513        | VP   | 1.3675      | 1347.89758   | 11.63566     | 3.9482  |
| Totals : |               |      |             | 3.41399e4    | 322.22416    |         |

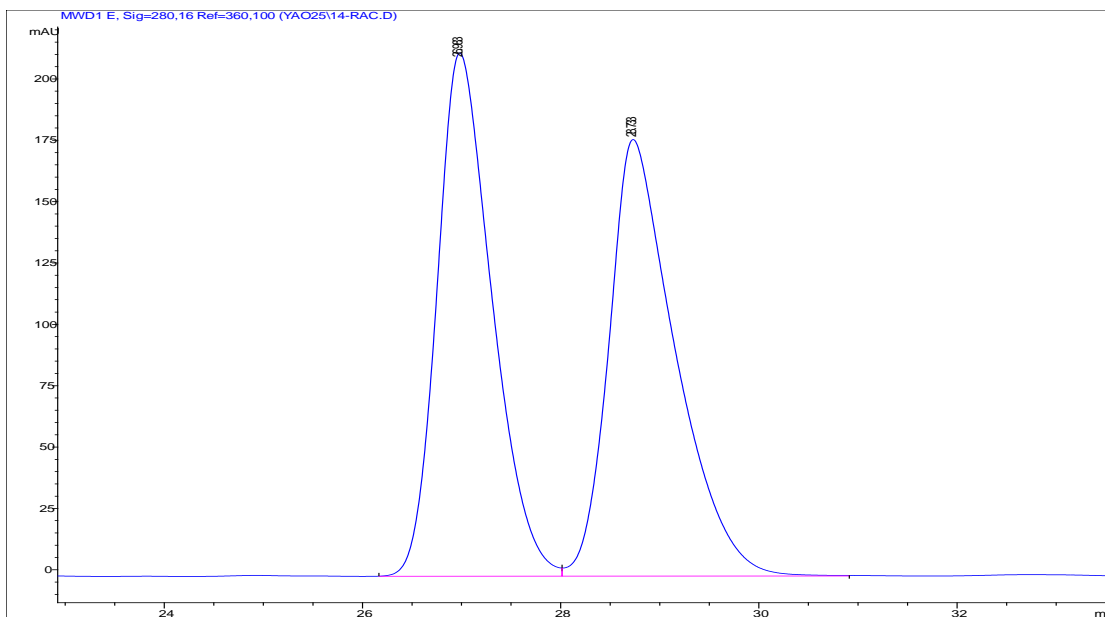

Signal 5: MWD1 E, Sig=280,16 Ref=360,100

| Peak # | RetTime [min] | Type | Width [min] | Area [mAU*s] | Height [mAU] | Area %  |
|--------|---------------|------|-------------|--------------|--------------|---------|
| 1      | 26.983        | BV   | 0.5861      | 8218.89355   | 213.05386    | 49.7787 |
| 2      | 28.733        | VB   | 0.6799      | 8291.97168   | 177.85040    | 50.2213 |

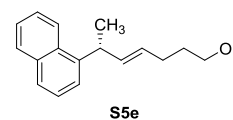

Totals : 1.65109e4 390.90427

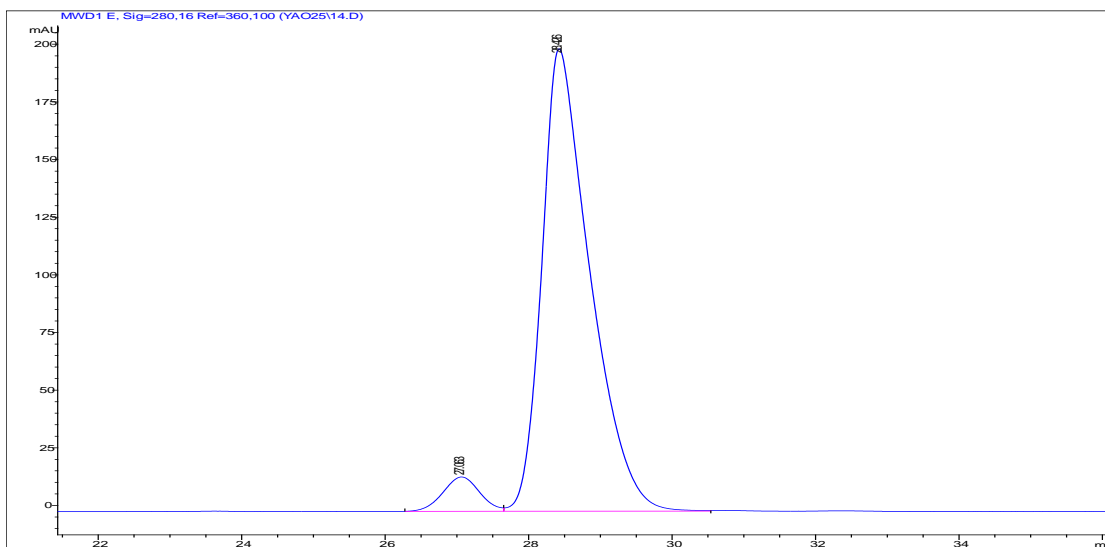

Signal 5: MWD1 E, Sig=280,16 Ref=360,100

| Peak # | RetTime [min] | Type | Width [min] | Area [mAU*s] | Height [mAU] | Area %  |
|--------|---------------|------|-------------|--------------|--------------|---------|
| 1      | 27.063        | BV   | 0.5601      | 531.11029    | 14.89005     | 5.3756  |
| 2      | 28.426        | VB   | 0.6722      | 9348.90430   | 200.42754    | 94.6244 |

Totals : 9880.01459 215.31758

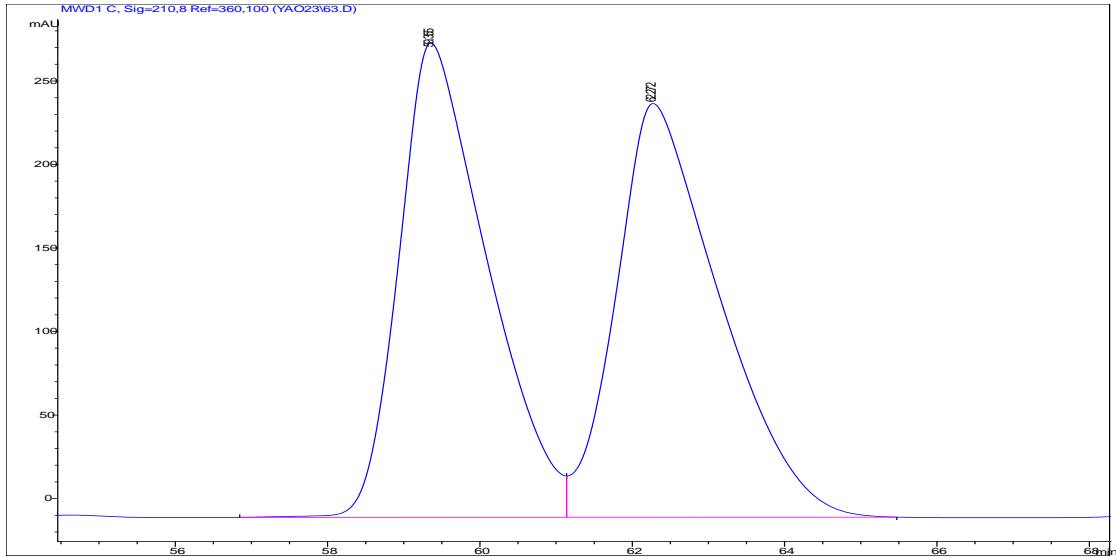

Signal 3: MWD1 C, Sig=210,8 Ref=360,100

| Peak #   | RetTime [min] | Type | Width [min] | Area [mAU*s] | Height [mAU] | Area %  |
|----------|---------------|------|-------------|--------------|--------------|---------|
| 1        | 59.355        | BV   | 1.1217      | 2.29247e4    | 284.00952    | 49.4731 |
| 2        | 62.272        | VB   | 1.2949      | 2.34129e4    | 247.65938    | 50.5269 |
| Totals : |               |      |             | 4.63376e4    | 531.66890    |         |

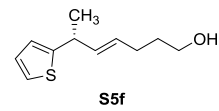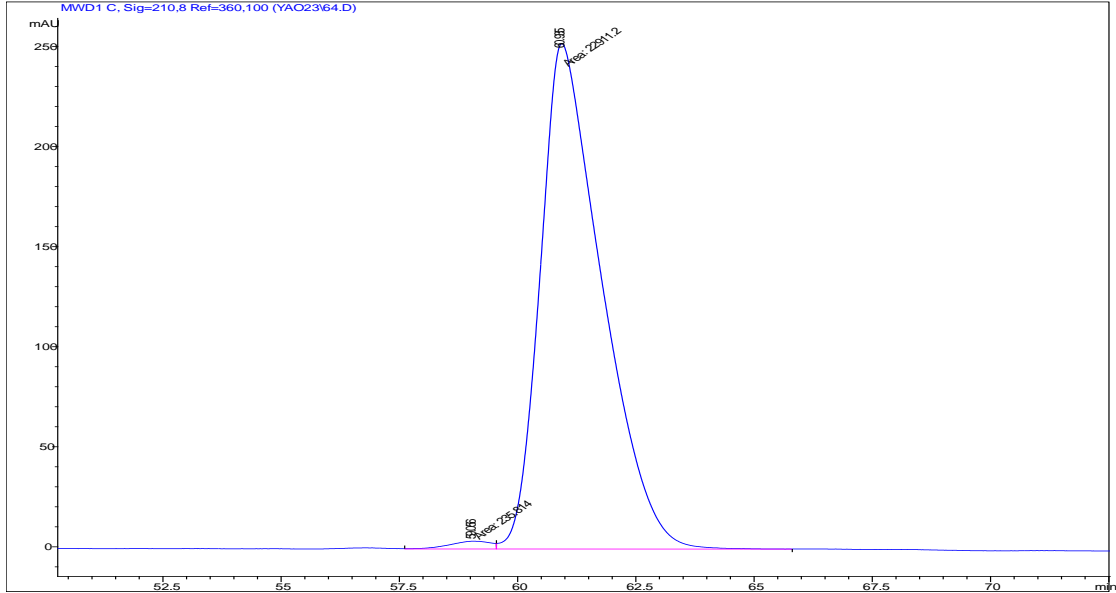

Signal 3: MWD1 C, Sig=210,8 Ref=360,100

| Peak #   | RetTime [min] | Type | Width [min] | Area [mAU*s] | Height [mAU] | Area %  |
|----------|---------------|------|-------------|--------------|--------------|---------|
| 1        | 59.056        | MF   | 1.0089      | 235.81412    | 3.89539      | 1.0188  |
| 2        | 60.935        | FM   | 1.5116      | 2.29112e4    | 252.61760    | 98.9812 |
| Totals : |               |      |             | 2.31470e4    | 256.51299    |         |



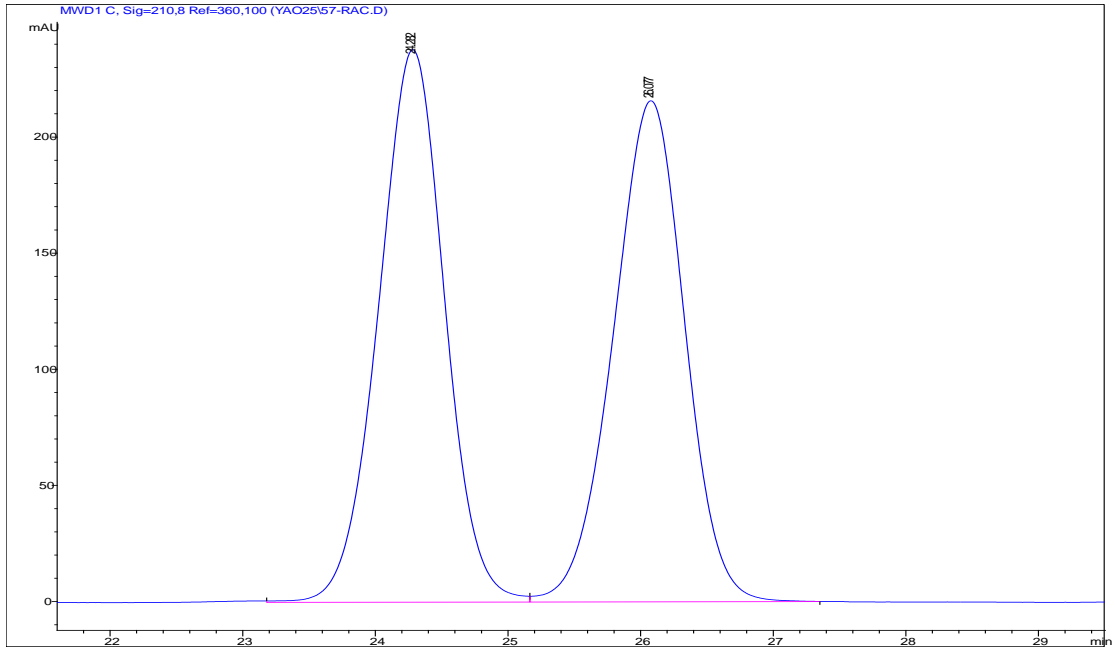

Signal 3: MWD1 C, Sig=210,8 Ref=360,100

| Peak # | RetTime [min] | Type | Width [min] | Area [mAU*s] | Height [mAU] | Area %  |
|--------|---------------|------|-------------|--------------|--------------|---------|
| 1      | 24.282        | VV   | 0.5306      | 8250.25684   | 237.91258    | 50.5113 |
| 2      | 26.077        | VB   | 0.5771      | 8083.23828   | 215.76483    | 49.4887 |

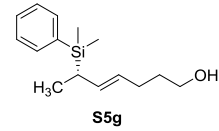

Totals : 1.63335e4 453.67741

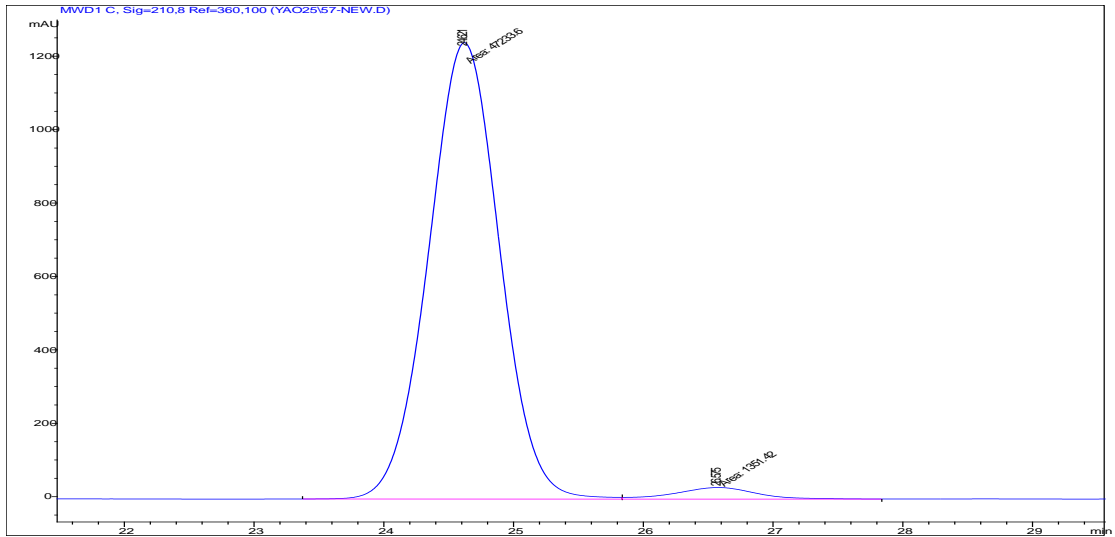

Signal 3: MWD1 C, Sig=210,8 Ref=360,100

| Peak # | RetTime [min] | Type | Width [min] | Area [mAU*s] | Height [mAU] | Area %  |
|--------|---------------|------|-------------|--------------|--------------|---------|
| 1      | 24.621        | MF   | 0.6330      | 4.72336e4    | 1243.59985   | 97.2184 |
| 2      | 26.575        | FM   | 0.7150      | 1351.42358   | 31.50056     | 2.7816  |

Totals : 4.85850e4 1275.10042

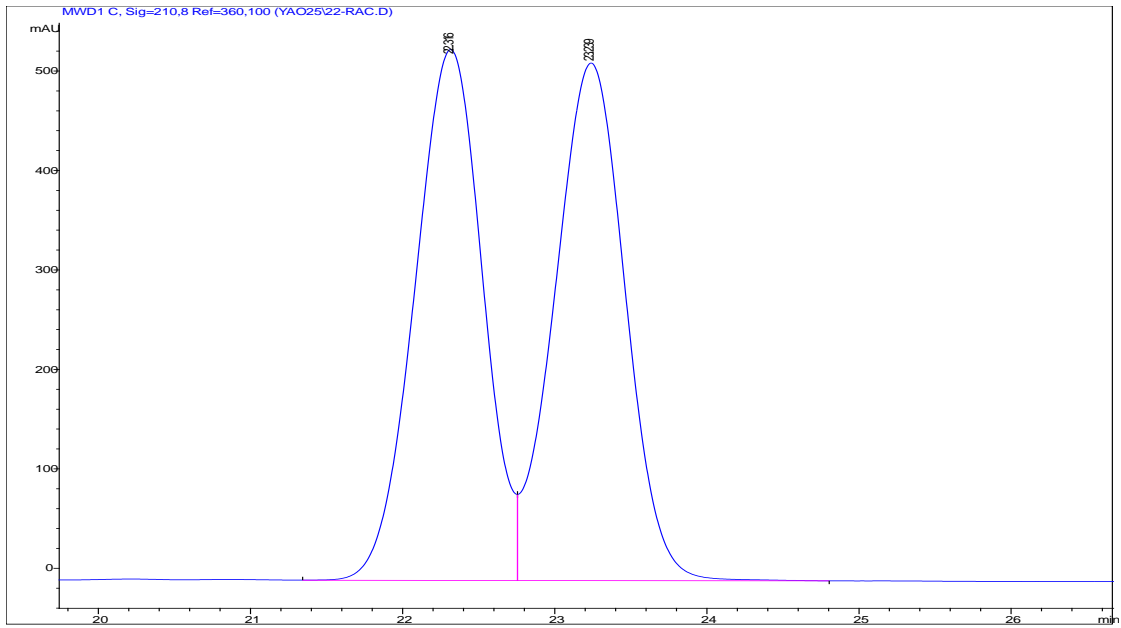

Signal 3: MWD1 C, Sig=210,8 Ref=360,100

| Peak #   | RetTime [min] | Type | Width [min] | Area [mAU*s] | Height [mAU] | Area %  |
|----------|---------------|------|-------------|--------------|--------------|---------|
| 1        | 22.316        | VV   | 0.4838      | 1.65538e4    | 533.80267    | 49.5973 |
| 2        | 23.239        | VB   | 0.5031      | 1.68226e4    | 520.44165    | 50.4027 |
| Totals : |               |      |             | 3.33764e4    | 1054.24432   |         |

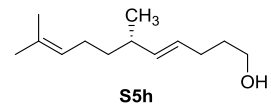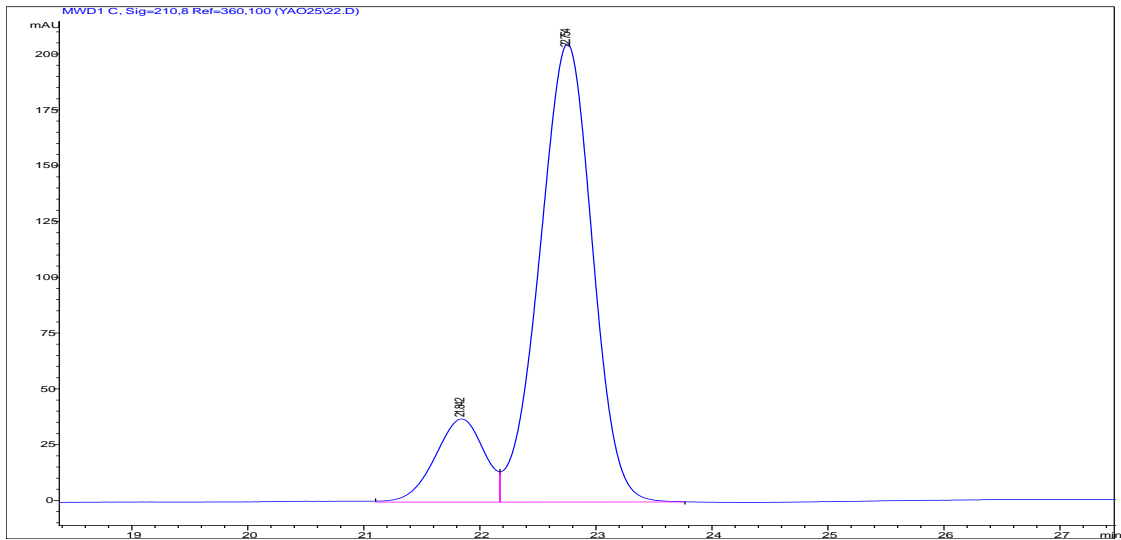

Signal 3: MWD1 C, Sig=210,8 Ref=360,100

| Peak #   | RetTime [min] | Type | Width [min] | Area [mAU*s] | Height [mAU] | Area %  |
|----------|---------------|------|-------------|--------------|--------------|---------|
| 1        | 21.842        | BV   | 0.4522      | 1098.66541   | 37.23779     | 14.4806 |
| 2        | 22.754        | VB   | 0.4888      | 6488.46289   | 205.26900    | 85.5194 |
| Totals : |               |      |             | 7587.12830   | 242.50679    |         |

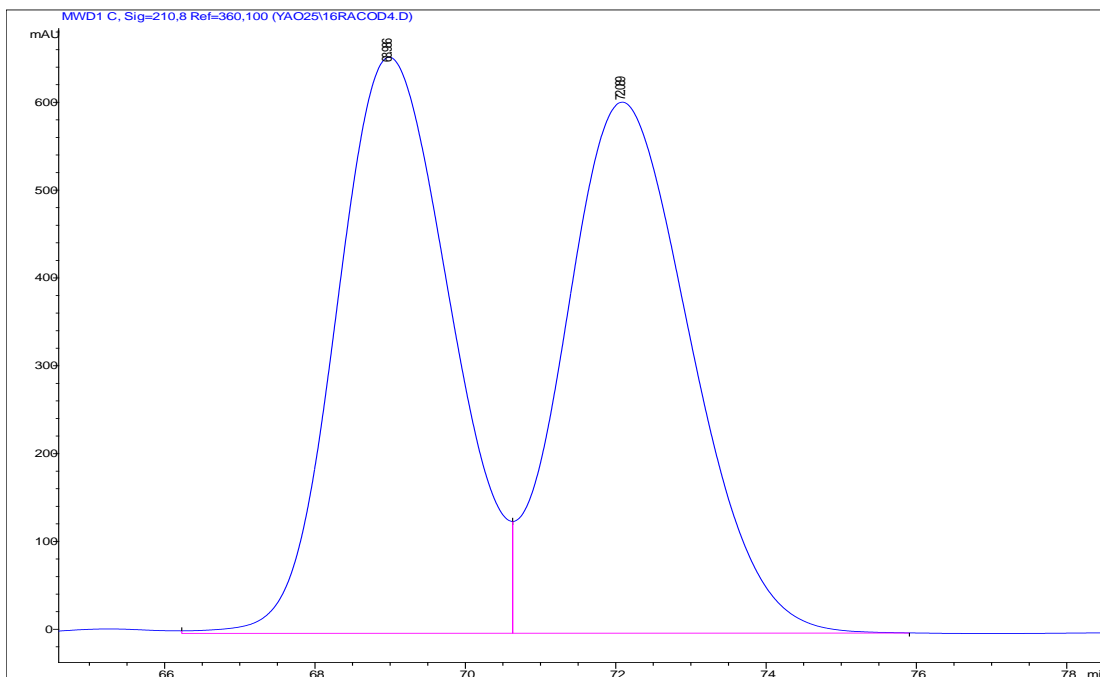

Signal 3: MWD1 C, Sig=210,8 Ref=360,100

| Peak #   | RetTime [min] | Type | Width [min] | Area [mAU*s] | Height [mAU] | Area %  |
|----------|---------------|------|-------------|--------------|--------------|---------|
| 1        | 68.986        | VV   | 1.5006      | 6.90719e4    | 655.91278    | 49.5156 |
| 2        | 72.089        | VB   | 1.6371      | 7.04232e4    | 604.50391    | 50.4844 |
| Totals : |               |      |             | 1.39495e5    | 1260.41669   |         |

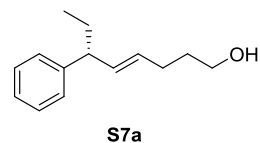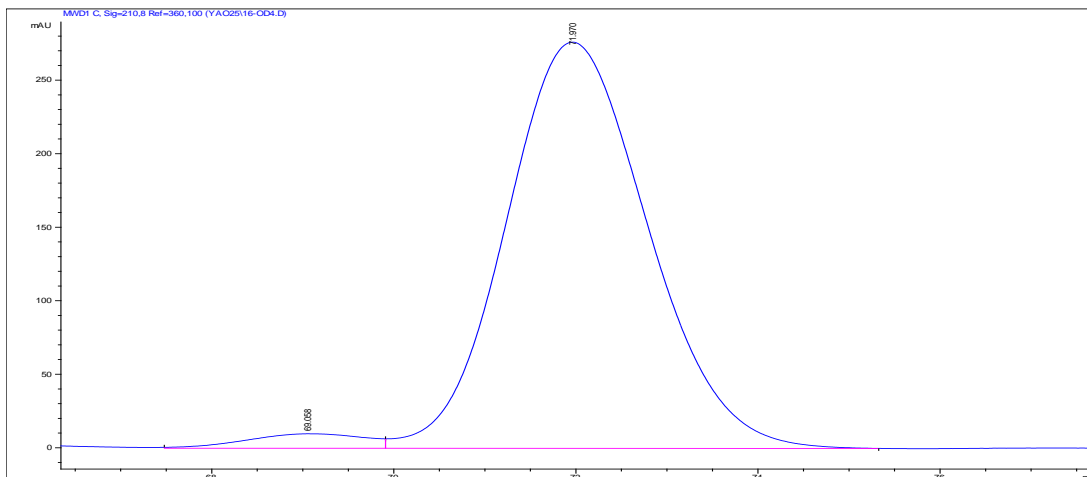

Signal 3: MWD1 C, Sig=210,8 Ref=360,100

| Peak #   | RetTime [min] | Type | Width [min] | Area [mAU*s] | Height [mAU] | Area %  |
|----------|---------------|------|-------------|--------------|--------------|---------|
| 1        | 69.058        | VV   | 1.0629      | 885.67426    | 9.87016      | 2.8794  |
| 2        | 71.970        | VB   | 1.5496      | 2.98730e4    | 276.24344    | 97.1206 |
| Totals : |               |      |             | 3.07587e4    | 286.11360    |         |

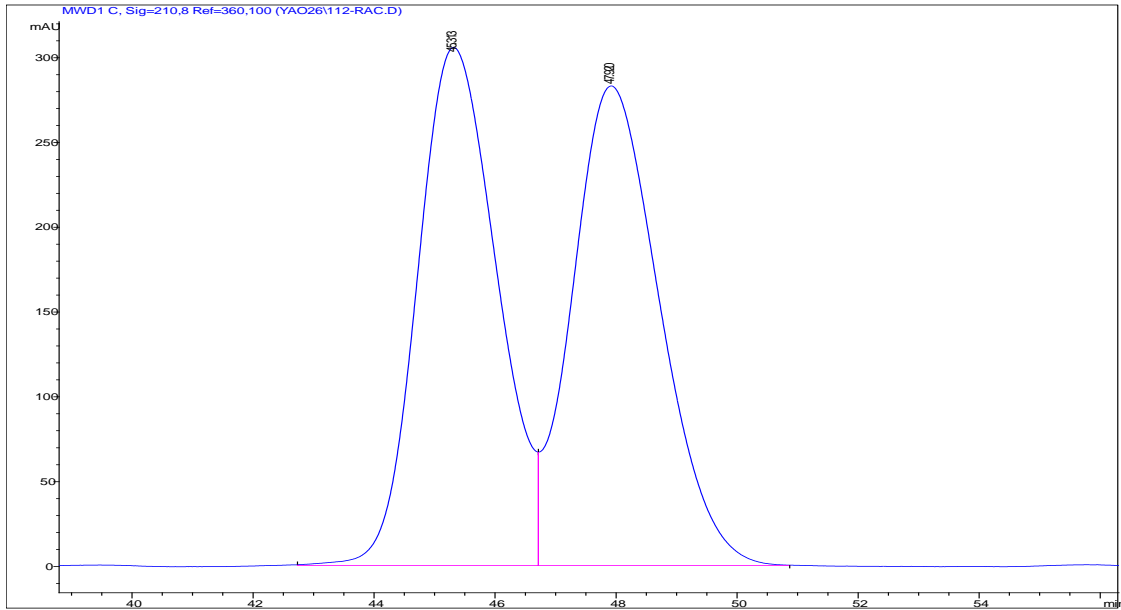

Signal 3: MWD1 C, Sig=210,8 Ref=360,100

| Peak #   | RetTime [min] | Type | Width [min] | Area [mAU*s] | Height [mAU] | Area %  |
|----------|---------------|------|-------------|--------------|--------------|---------|
| 1        | 45.313        | BV   | 1.4058      | 2.78060e4    | 305.52203    | 49.4240 |
| 2        | 47.920        | VB   | 1.5457      | 2.84541e4    | 282.82498    | 50.5760 |
| Totals : |               |      |             | 5.62601e4    | 588.34702    |         |

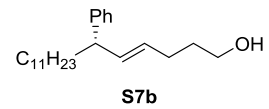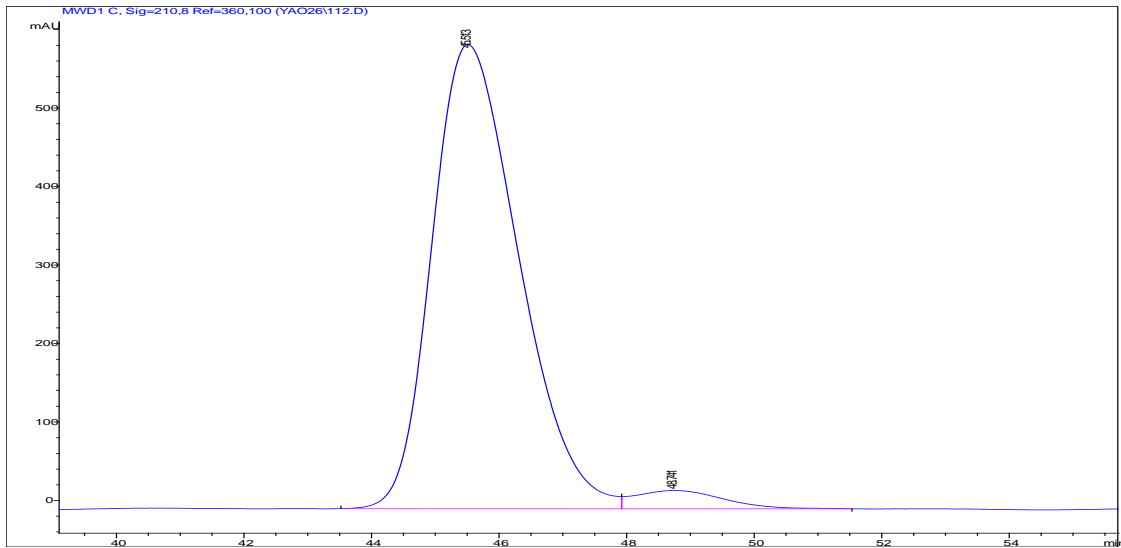

Signal 3: MWD1 C, Sig=210,8 Ref=360,100

| Peak #   | RetTime [min] | Type | Width [min] | Area [mAU*s] | Height [mAU] | Area %  |
|----------|---------------|------|-------------|--------------|--------------|---------|
| 1        | 45.513        | BV   | 1.4321      | 5.59715e4    | 591.44849    | 96.1317 |
| 2        | 48.741        | VB   | 1.2217      | 2252.27173   | 23.34252     | 3.8683  |
| Totals : |               |      |             | 5.82237e4    | 614.79101    |         |

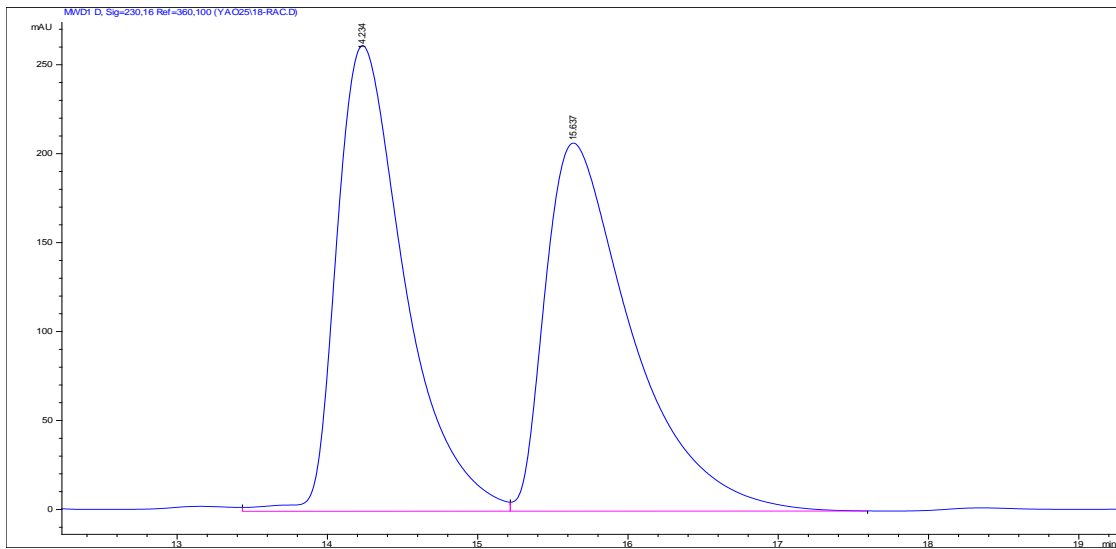

Signal 4: MWD1 D, Sig=230,16 Ref=360,100

| Peak #   | RetTime [min] | Type | Width [min] | Area [mAU*s] | Height [mAU] | Area %  |
|----------|---------------|------|-------------|--------------|--------------|---------|
| 1        | 14.234        | VV   | 0.4815      | 8247.66797   | 261.84363    | 49.9225 |
| 2        | 15.637        | VB   | 0.6005      | 8273.28223   | 206.90852    | 50.0775 |
| Totals : |               |      |             | 1.65210e4    | 468.75215    |         |

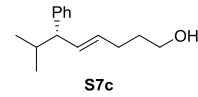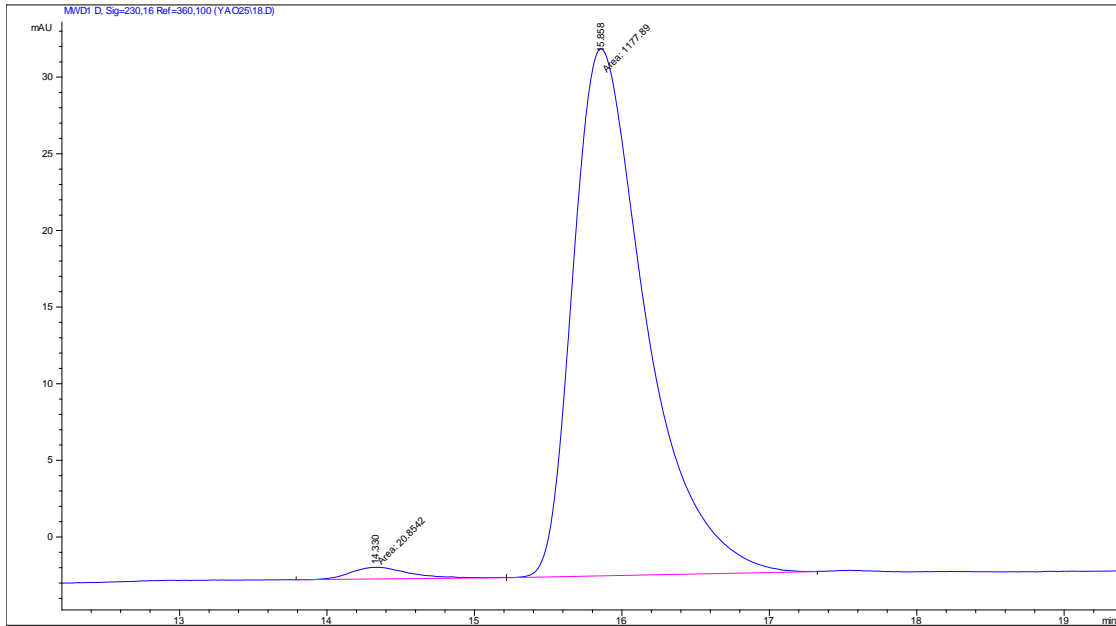

Signal 4: MWD1 D, Sig=230,16 Ref=360,100

| Peak #   | RetTime [min] | Type | Width [min] | Area [mAU*s] | Height [mAU] | Area %  |
|----------|---------------|------|-------------|--------------|--------------|---------|
| 1        | 14.330        | MM   | 0.4581      | 20.85415     | 7.58792e-1   | 1.7397  |
| 2        | 15.858        | MM   | 0.5708      | 1177.88574   | 34.39566     | 98.2603 |
| Totals : |               |      |             | 1198.73990   | 35.15445     |         |

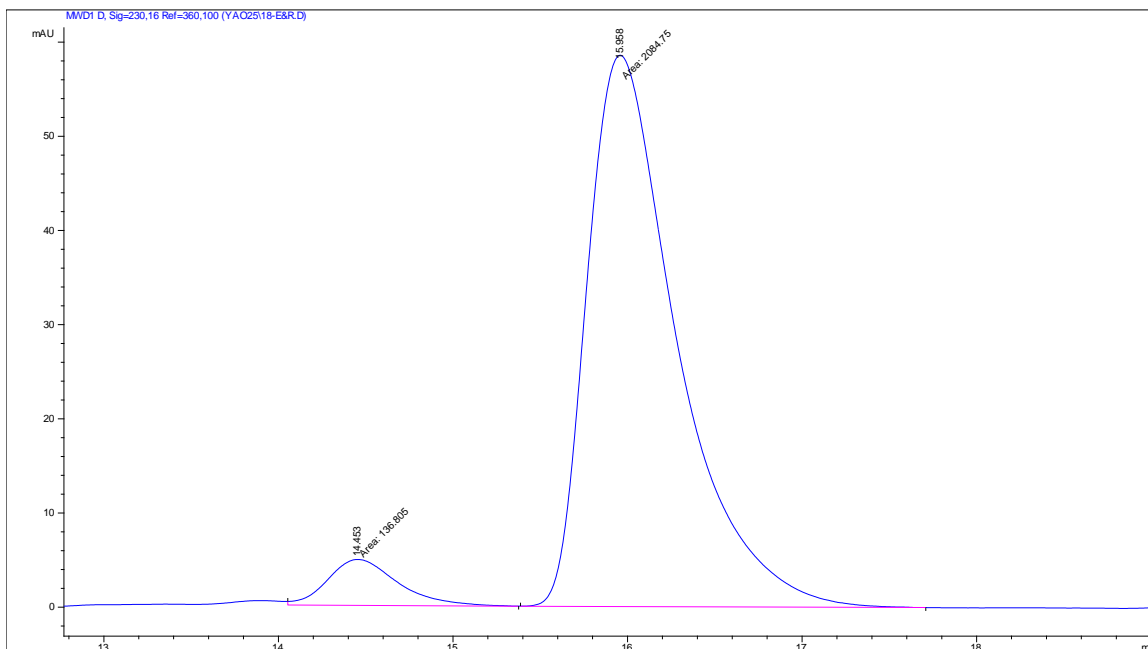

Signal 4: MWD1 D, Sig=230,16 Ref=360,100

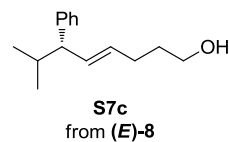

| Peak #   | RetTime [min] | Type | Width [min] | Area [mAU*s] | Height [mAU] | Area %  |
|----------|---------------|------|-------------|--------------|--------------|---------|
| 1        | 14.453        | MM   | 0.4676      | 136.80518    | 4.87605      | 6.1581  |
| 2        | 15.958        | MM   | 0.5935      | 2084.75269   | 58.54684     | 93.8419 |
| Totals : |               |      |             | 2221.55786   | 63.42290     |         |

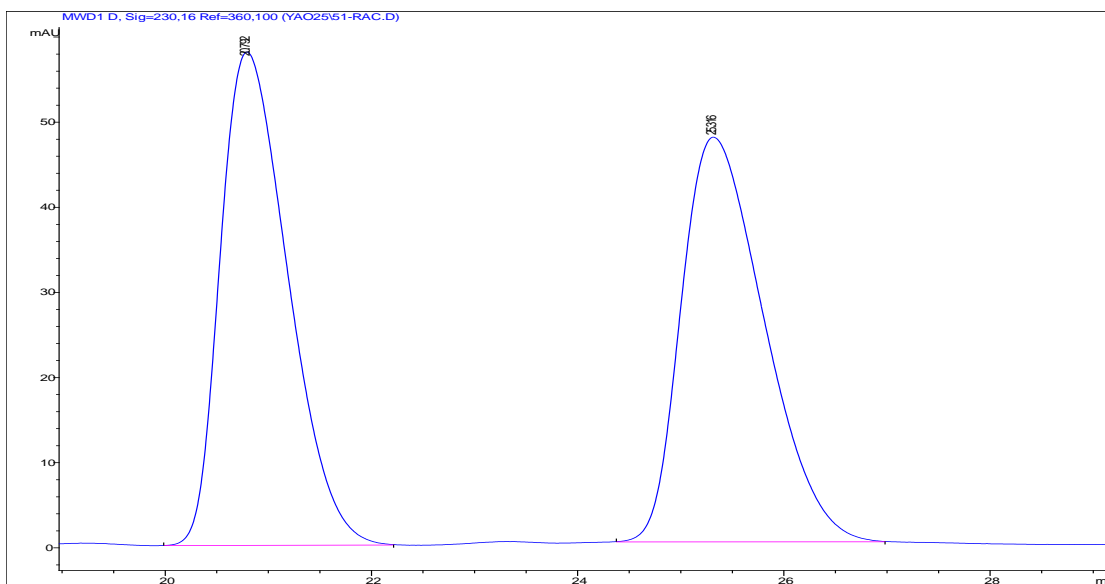

Signal 4: MWD1 D, Sig=230,16 Ref=360,100

| Peak #   | RetTime [min] | Type | Width [min] | Area [mAU*s] | Height [mAU] | Area %  |
|----------|---------------|------|-------------|--------------|--------------|---------|
| 1        | 20.792        | BB   | 0.7163      | 2644.68457   | 57.96334     | 49.9100 |
| 2        | 25.316        | BB   | 0.8713      | 2654.22095   | 47.54547     | 50.0900 |
| Totals : |               |      |             | 5298.90552   | 105.50880    |         |

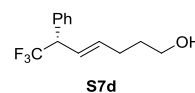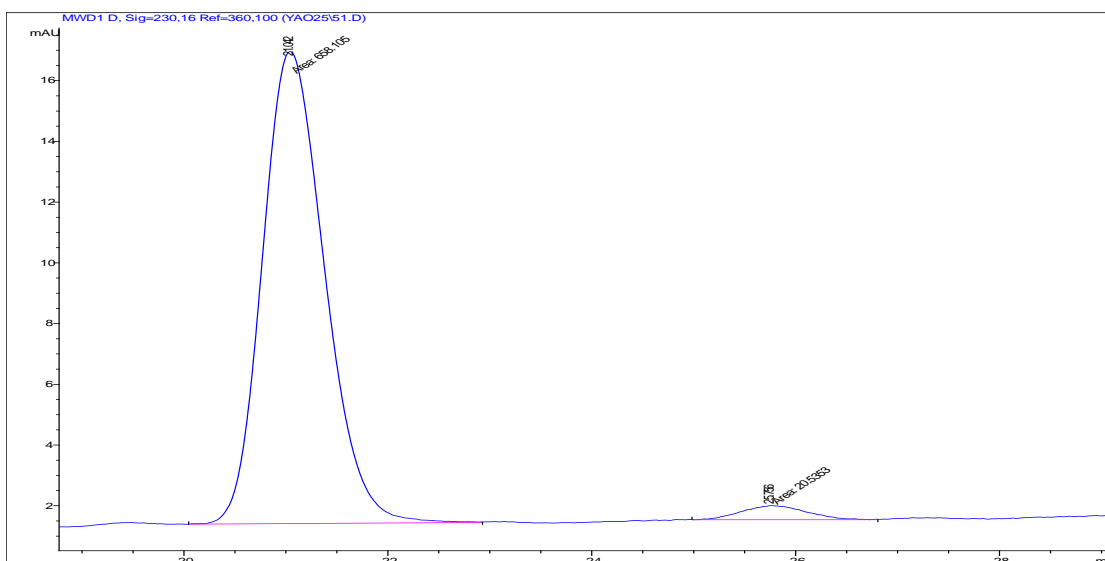

Signal 4: MWD1 D, Sig=230,16 Ref=360,100

| Peak #   | RetTime [min] | Type | Width [min] | Area [mAU*s] | Height [mAU] | Area %  |
|----------|---------------|------|-------------|--------------|--------------|---------|
| 1        | 21.042        | MM   | 0.7056      | 658.10541    | 15.54498     | 96.9741 |
| 2        | 25.756        | MM   | 0.7391      | 20.53532     | 4.63092e-1   | 3.0259  |
| Totals : |               |      |             | 678.64072    | 16.00807     |         |

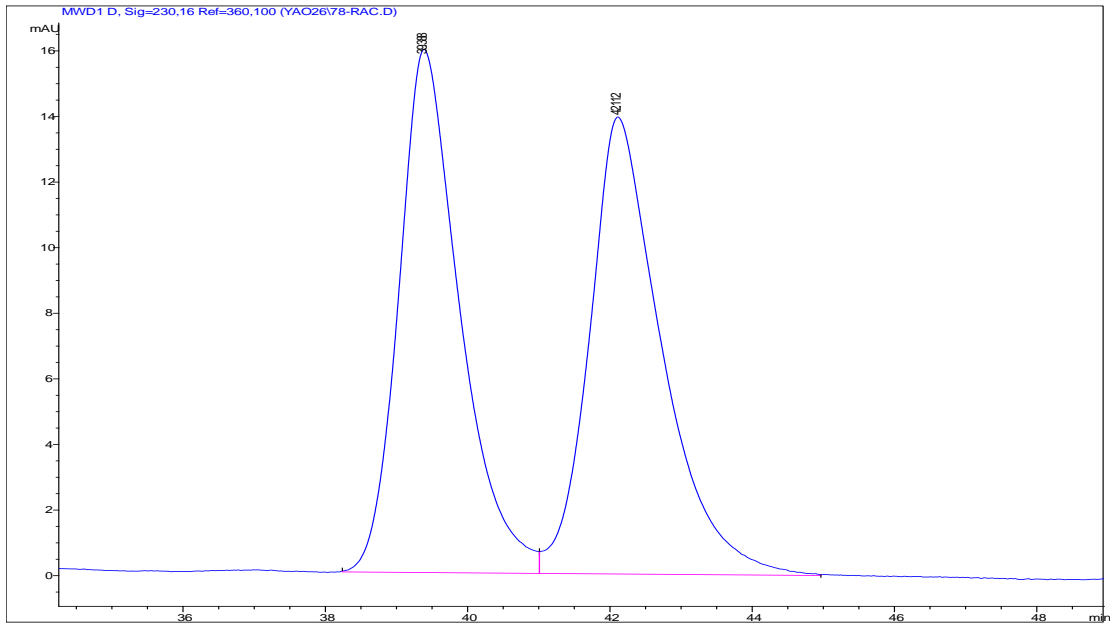

Signal 4: MWD1 D, Sig=230,16 Ref=360,100

| Peak #   | RetTime [min] | Type | Width [min] | Area [mAU*s] | Height [mAU] | Area %  |
|----------|---------------|------|-------------|--------------|--------------|---------|
| 1        | 39.388        | BV   | 0.8674      | 950.57697    | 15.94785     | 49.1595 |
| 2        | 42.112        | VB   | 0.9914      | 983.08289    | 13.92924     | 50.8405 |
| Totals : |               |      |             | 1933.65985   | 29.87709     |         |

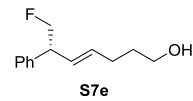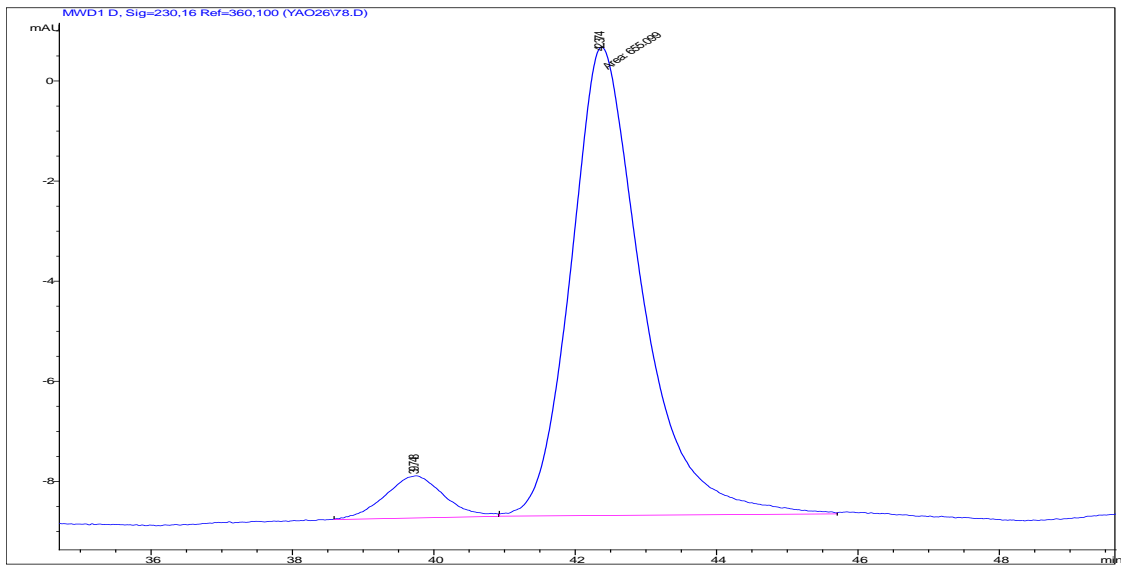

Signal 4: MWD1 D, Sig=230,16 Ref=360,100

| Peak #   | RetTime [min] | Type | Width [min] | Area [mAU*s] | Height [mAU] | Area %  |
|----------|---------------|------|-------------|--------------|--------------|---------|
| 1        | 39.748        | BV   | 0.8130      | 48.92134     | 8.43062e-1   | 6.9489  |
| 2        | 42.374        | MM   | 1.1663      | 655.09906    | 9.36190      | 93.0511 |
| Totals : |               |      |             | 704.02040    | 10.20496     |         |



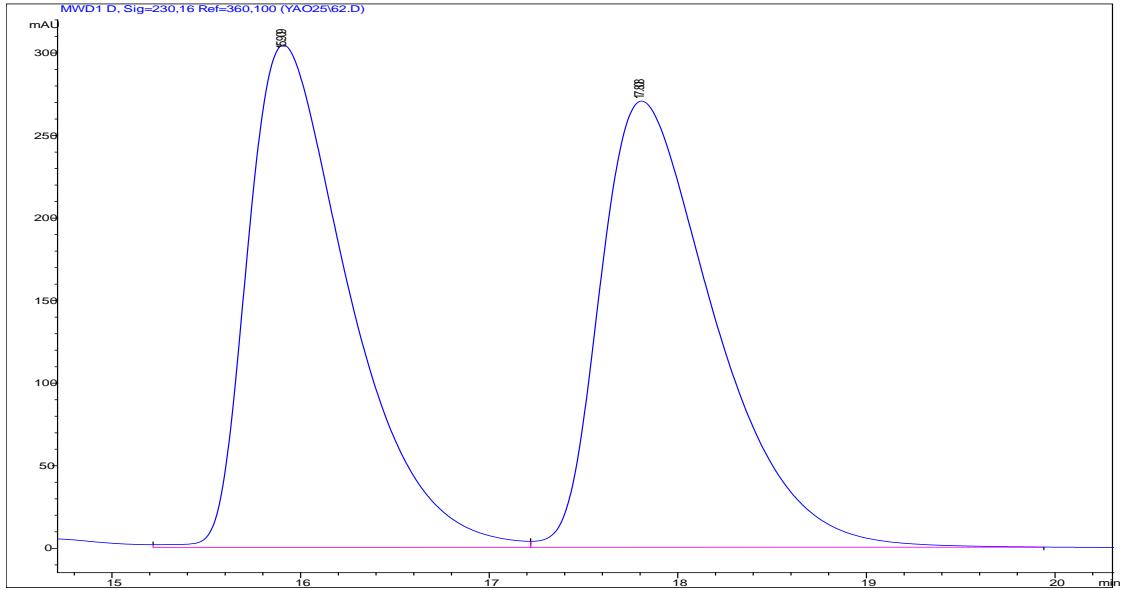

Signal 4: MWD1 D, Sig=230,16 Ref=360,100

| Peak #   | RetTime [min] | Type | Width [min] | Area [mAU*s] | Height [mAU] | Area %  |
|----------|---------------|------|-------------|--------------|--------------|---------|
| 1        | 15.909        | VV   | 0.5689      | 1.13955e4    | 304.32529    | 49.9911 |
| 2        | 17.808        | VB   | 0.6461      | 1.13996e4    | 270.25388    | 50.0089 |
| Totals : |               |      |             | 2.27951e4    | 574.57916    |         |

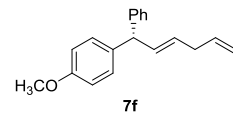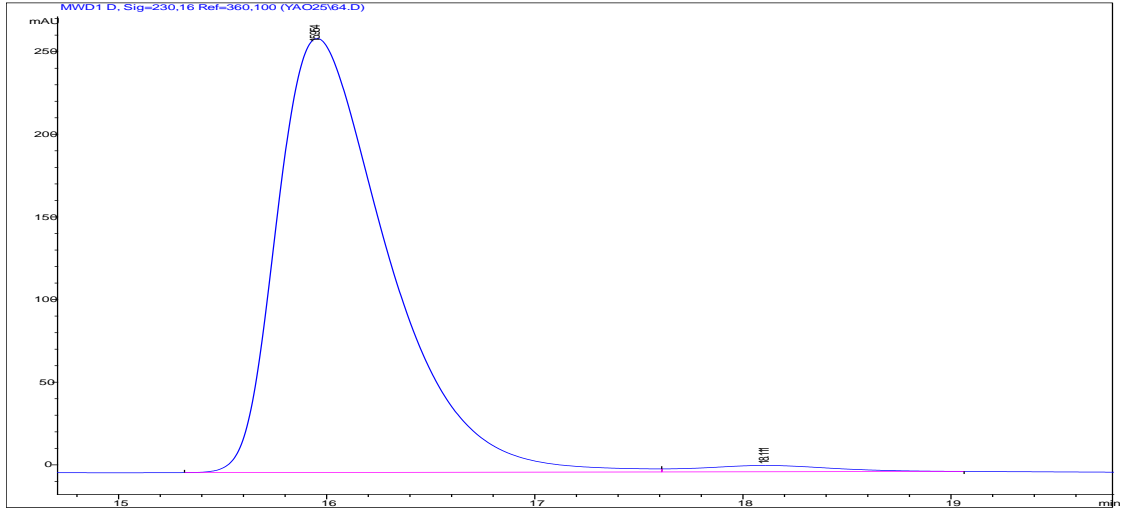

Signal 4: MWD1 D, Sig=230,16 Ref=360,100

| Peak #   | RetTime [min] | Type | Width [min] | Area [mAU*s] | Height [mAU] | Area %  |
|----------|---------------|------|-------------|--------------|--------------|---------|
| 1        | 15.954        | BB   | 0.5645      | 9693.57422   | 262.69174    | 98.2585 |
| 2        | 18.111        | BB   | 0.5862      | 171.80400    | 3.85338      | 1.7415  |
| Totals : |               |      |             | 9865.37822   | 266.54512    |         |

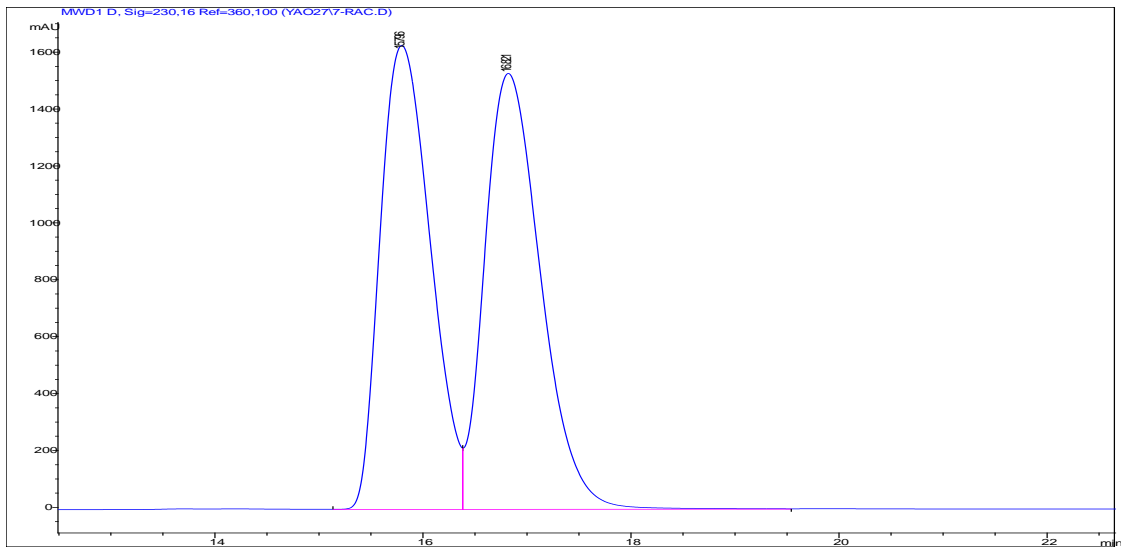

Signal 4: MWD1 D, Sig=230,16 Ref=360,100

| Peak #   | RetTime [min] | Type | Width [min] | Area [mAU*s] | Height [mAU] | Area %  |
|----------|---------------|------|-------------|--------------|--------------|---------|
| 1        | 15.796        | VV   | 0.5317      | 5.47482e4    | 1630.75940   | 48.8053 |
| 2        | 16.821        | VV   | 0.5813      | 5.74284e4    | 1532.09973   | 51.1947 |
| Totals : |               |      |             | 1.12177e5    | 3162.85913   |         |

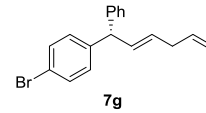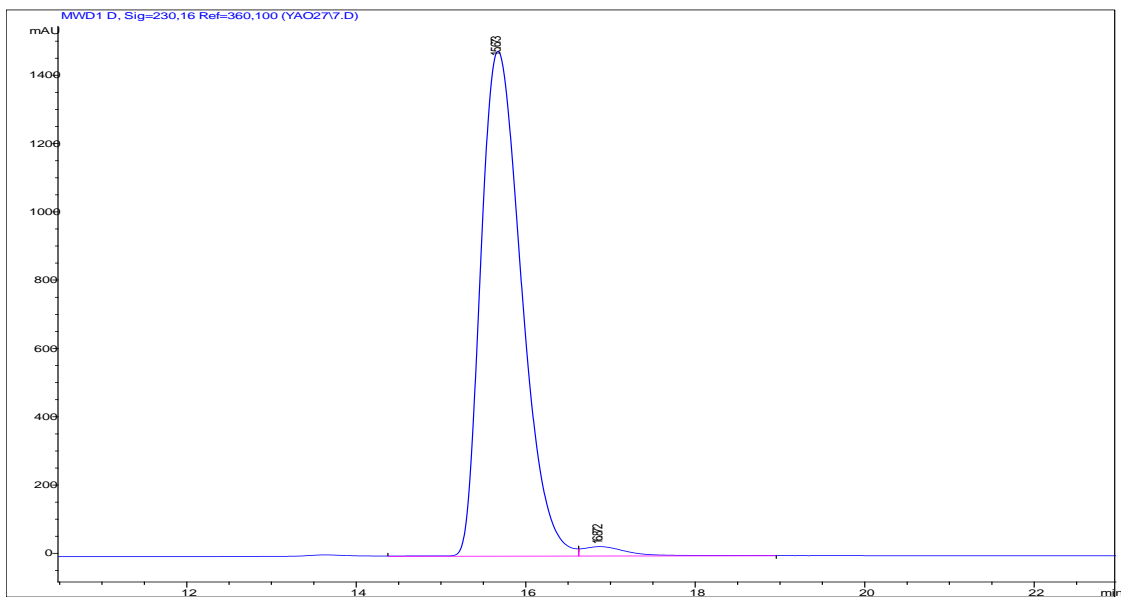

Signal 4: MWD1 D, Sig=230,16 Ref=360,100

| Peak #   | RetTime [min] | Type | Width [min] | Area [mAU*s] | Height [mAU] | Area %  |
|----------|---------------|------|-------------|--------------|--------------|---------|
| 1        | 15.673        | VV   | 0.5279      | 4.91434e4    | 1478.21790   | 97.9808 |
| 2        | 16.872        | VB   | 0.5417      | 1012.75592   | 27.49878     | 2.0192  |
| Totals : |               |      |             | 5.01562e4    | 1505.71668   |         |

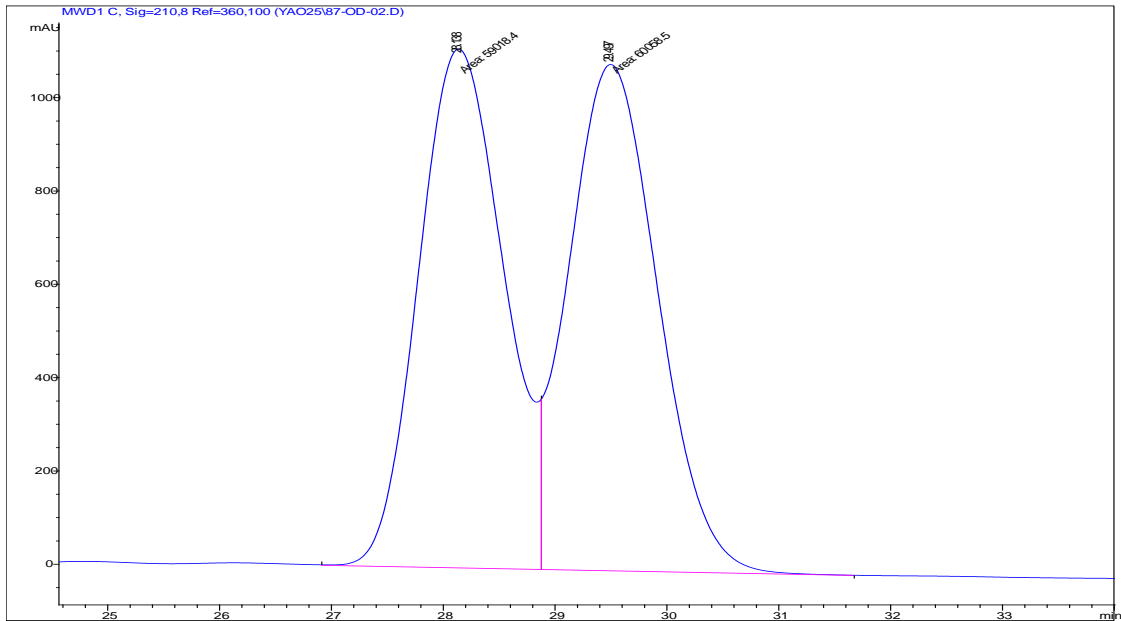

Signal 3: MWD1 C, Sig=210,8 Ref=360,100

| Peak # | RetTime [min] | Type | Width [min] | Area [mAU*s] | Height [mAU] | Area %  |
|--------|---------------|------|-------------|--------------|--------------|---------|
| 1      | 28.138        | MF   | 0.8848      | 5.90184e4    | 1111.71680   | 49.5633 |
| 2      | 29.497        | FM   | 0.9226      | 6.00585e4    | 1084.94263   | 50.4367 |

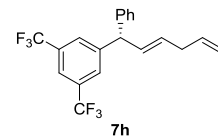

Totals : 1.19077e5 2196.65942

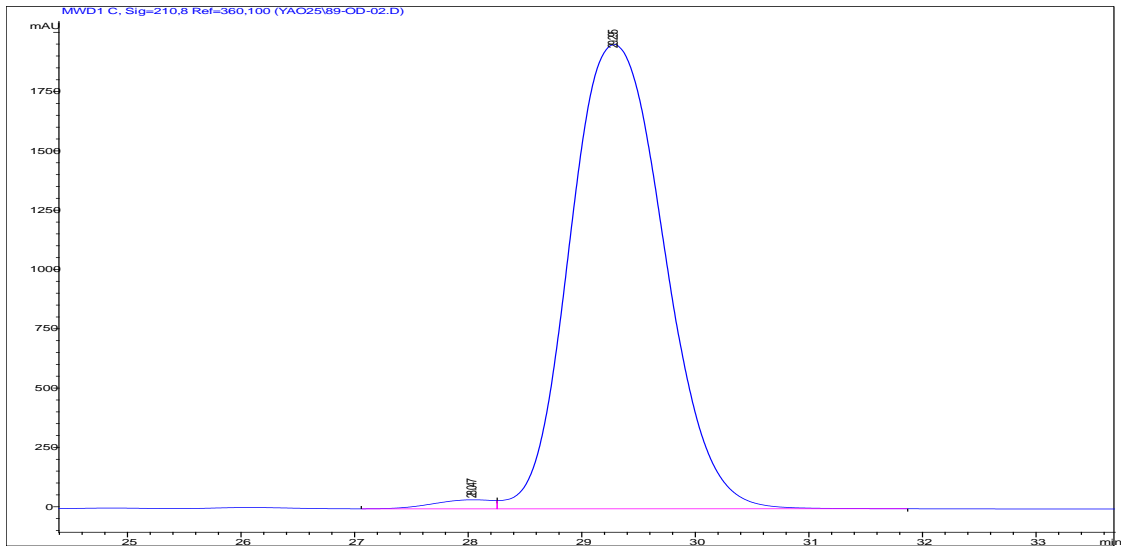

Signal 3: MWD1 C, Sig=210,8 Ref=360,100

| Peak # | RetTime [min] | Type | Width [min] | Area [mAU*s] | Height [mAU] | Area %  |
|--------|---------------|------|-------------|--------------|--------------|---------|
| 1      | 28.047        | VV   | 0.5453      | 1378.86389   | 38.18208     | 1.2103  |
| 2      | 29.295        | VB   | 0.7928      | 1.12545e5    | 1957.37463   | 98.7897 |

Totals : 1.13923e5 1995.55671

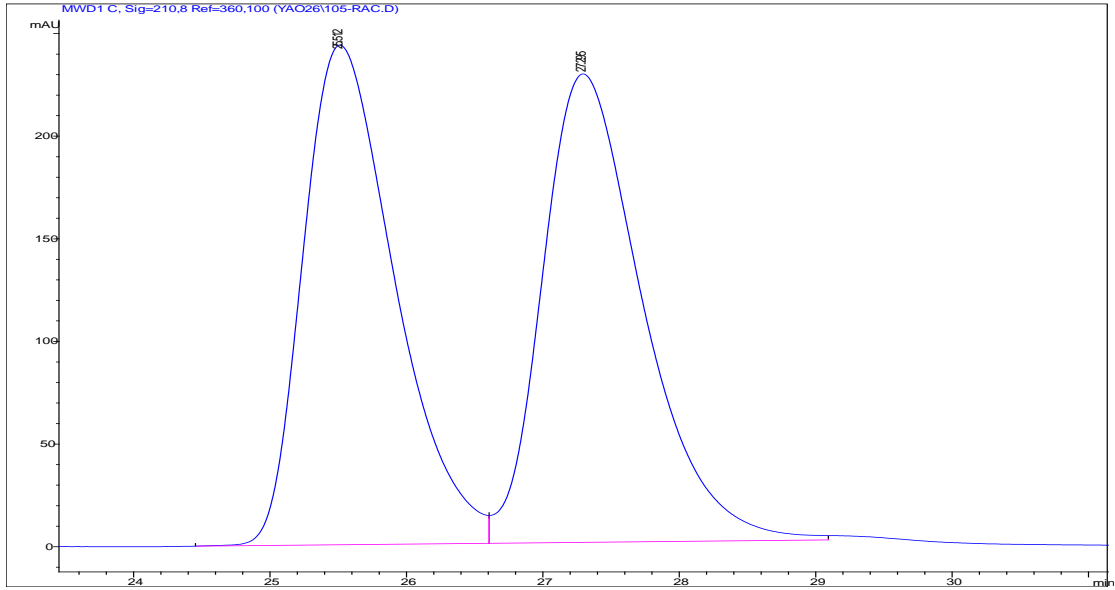

Signal 3: MWD1 C, Sig=210,8 Ref=360,100

| Peak #   | RetTime [min] | Type | Width [min] | Area [mAU*s] | Height [mAU] | Area %  |
|----------|---------------|------|-------------|--------------|--------------|---------|
| 1        | 25.512        | PV   | 0.7287      | 1.13656e4    | 243.43730    | 49.4575 |
| 2        | 27.295        | VB   | 0.7619      | 1.16149e4    | 228.17755    | 50.5425 |
| Totals : |               |      |             | 2.29805e4    | 471.61485    |         |

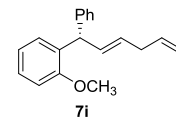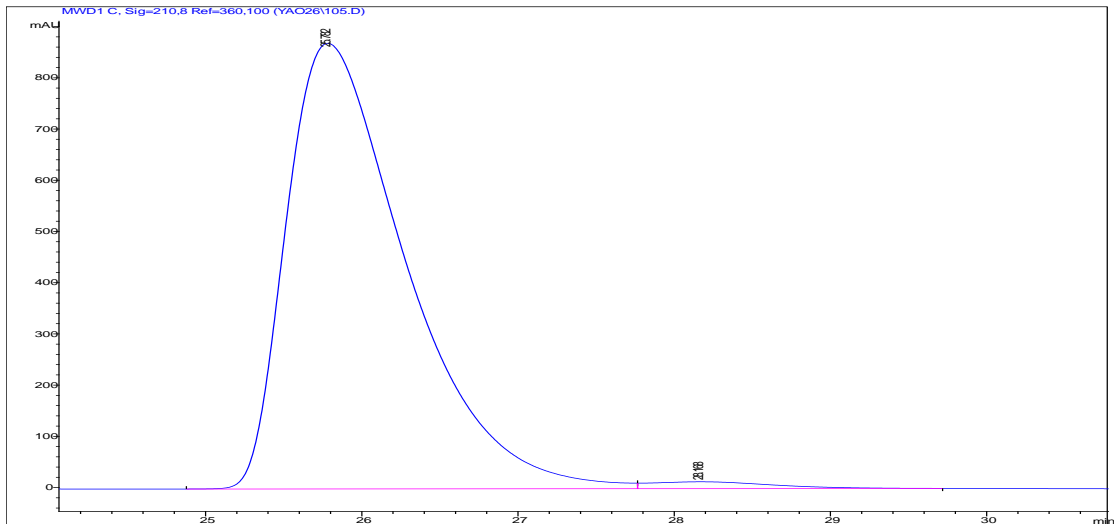

Signal 3: MWD1 C, Sig=210,8 Ref=360,100

| Peak #   | RetTime [min] | Type | Width [min] | Area [mAU*s] | Height [mAU] | Area %  |
|----------|---------------|------|-------------|--------------|--------------|---------|
| 1        | 25.782        | BV   | 0.8096      | 4.63662e4    | 870.23834    | 98.4141 |
| 2        | 28.168        | VB   | 0.7607      | 747.16693    | 13.52102     | 1.5859  |
| Totals : |               |      |             | 4.71133e4    | 883.75936    |         |

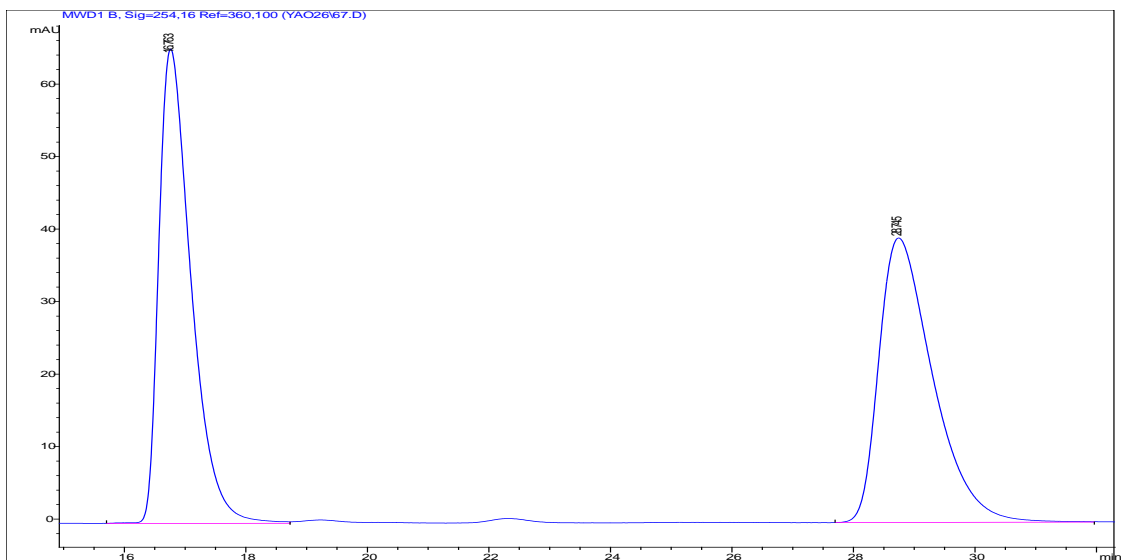

Signal 2: MWD1 B, Sig=254,16 Ref=360,100

| Peak #   | RetTime [min] | Type | Width [min] | Area [mAU*s] | Height [mAU] | Area %  |
|----------|---------------|------|-------------|--------------|--------------|---------|
| 1        | 16.763        | BV   | 0.5672      | 2418.63281   | 65.43732     | 50.0862 |
| 2        | 28.745        | PB   | 0.9409      | 2410.30298   | 39.22664     | 49.9138 |
| Totals : |               |      |             | 4828.93579   | 104.66396    |         |

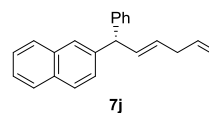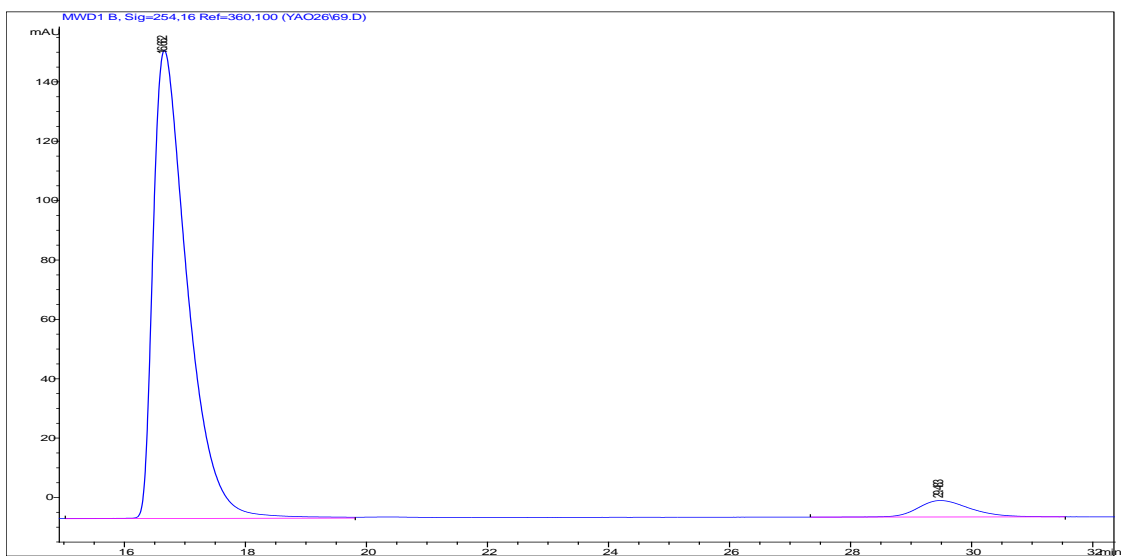

Signal 2: MWD1 B, Sig=254,16 Ref=360,100

| Peak #   | RetTime [min] | Type | Width [min] | Area [mAU*s] | Height [mAU] | Area %  |
|----------|---------------|------|-------------|--------------|--------------|---------|
| 1        | 16.662        | VB   | 0.5941      | 6193.04150   | 157.71408    | 94.9054 |
| 2        | 29.483        | PB   | 0.9116      | 332.44989    | 5.54438      | 5.0946  |
| Totals : |               |      |             | 6525.49139   | 163.25846    |         |

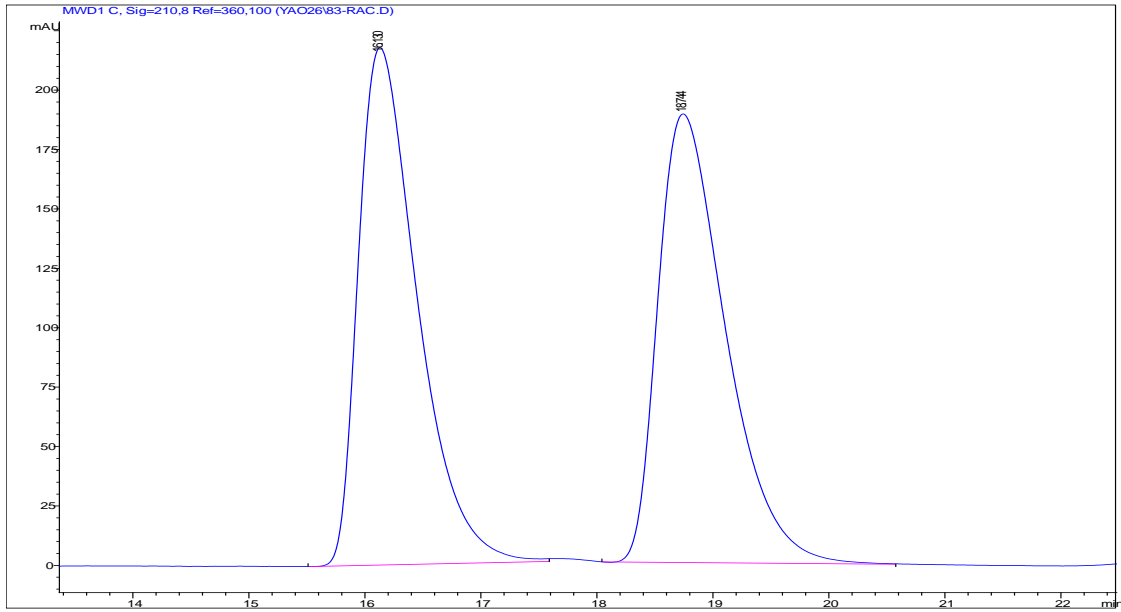

Signal 3: MWD1 C, Sig=210,8 Ref=360,100

| Peak #   | RetTime [min] | Type | Width [min] | Area [mAU*s] | Height [mAU] | Area %  |
|----------|---------------|------|-------------|--------------|--------------|---------|
| 1        | 16.130        | PB   | 0.5438      | 7686.93652   | 217.77892    | 50.1411 |
| 2        | 18.744        | PB   | 0.6244      | 7643.66895   | 188.75621    | 49.8589 |
| Totals : |               |      |             | 1.53306e4    | 406.53513    |         |

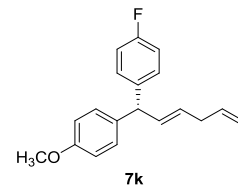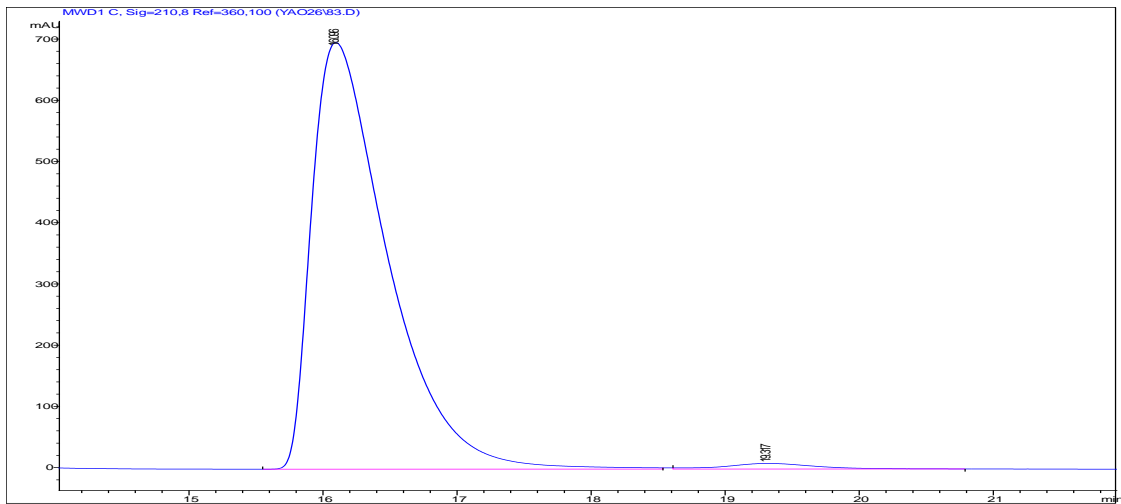

Signal 3: MWD1 C, Sig=210,8 Ref=360,100

| Peak #   | RetTime [min] | Type | Width [min] | Area [mAU*s] | Height [mAU] | Area %  |
|----------|---------------|------|-------------|--------------|--------------|---------|
| 1        | 16.096        | PB   | 0.5961      | 2.74944e4    | 697.13684    | 98.4468 |
| 2        | 19.317        | BB   | 0.6573      | 433.77316    | 9.28090      | 1.5532  |
| Totals : |               |      |             | 2.79281e4    | 706.41774    |         |

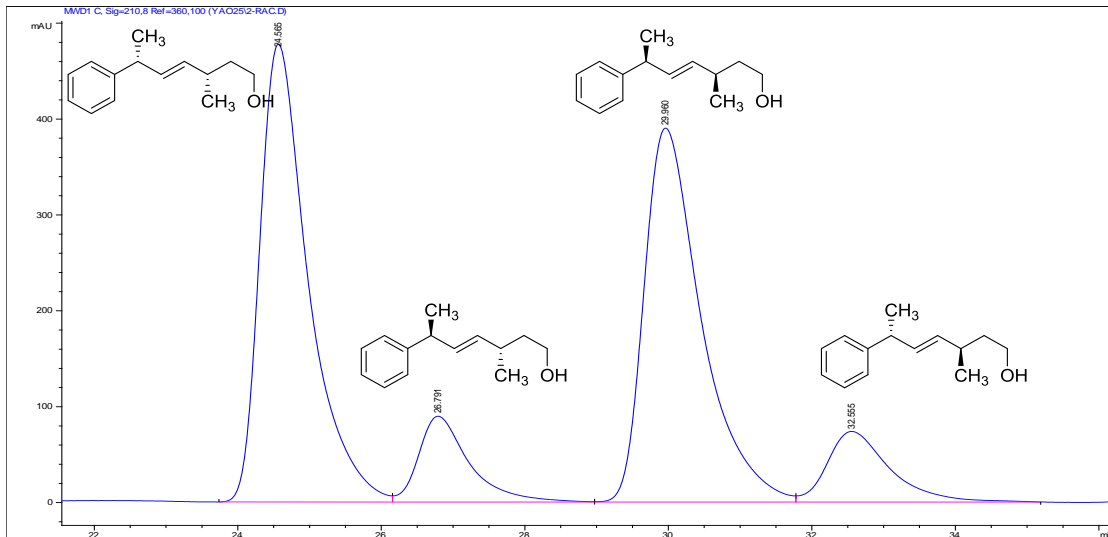

Signal 3: MWD1 C, Sig=210,8 Ref=360,100

| Peak # | RetTime [min] | Type | Width [min] | Area [mAU*s] | Height [mAU] | Area %  |
|--------|---------------|------|-------------|--------------|--------------|---------|
| 1      | 24.565        | PV   | 0.6994      | 2.23288e4    | 477.60526    | 42.3377 |
| 2      | 26.791        | VV   | 0.7242      | 4372.46973   | 89.47145     | 8.2907  |
| 3      | 29.960        | VV   | 0.8294      | 2.15734e4    | 389.99411    | 40.9053 |
| 4      | 32.555        | VB   | 0.8933      | 4465.14648   | 73.65461     | 8.4664  |

Totals : 5.27398e4 1030.72543

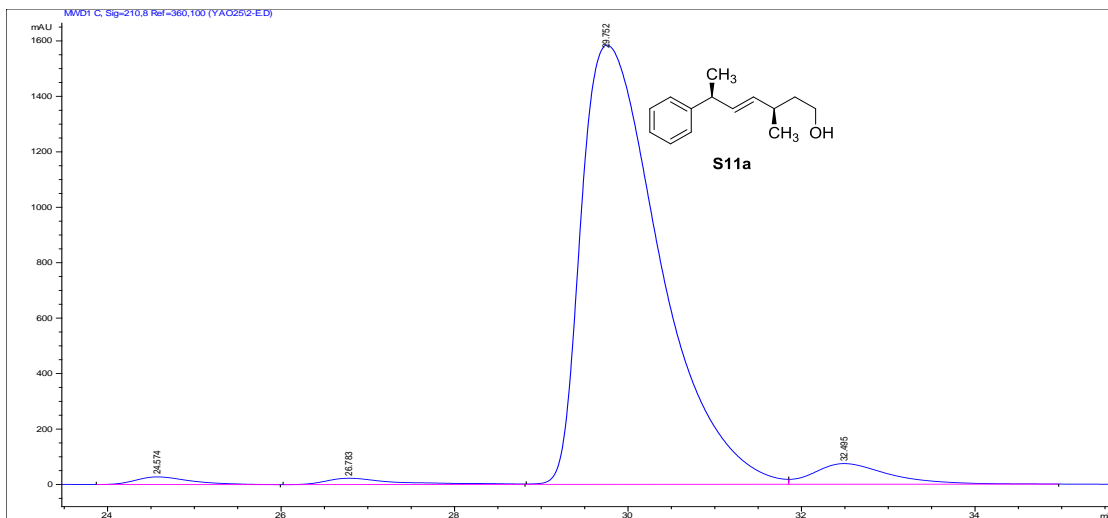

Signal 3: MWD1 C, Sig=210,8 Ref=360,100

| Peak # | RetTime [min] | Type | Width [min] | Area [mAU*s] | Height [mAU] | Area %  |
|--------|---------------|------|-------------|--------------|--------------|---------|
| 1      | 24.574        | PB   | 0.6512      | 1201.75940   | 27.53548     | 1.1228  |
| 2      | 26.783        | PB   | 0.7932      | 1297.54919   | 22.82468     | 1.2123  |
| 3      | 29.752        | BV   | 0.9605      | 1.00058e5    | 1584.97046   | 93.4847 |
| 4      | 32.495        | VB   | 0.8869      | 4474.07861   | 74.47469     | 4.1802  |

Totals : 1.07031e5 1709.80531



Signal 3: MWD1 C, Sig=210,8 Ref=360,100

| Peak # | RetTime [min] | Type | Width [min] | Area [mAU*s] | Height [mAU] | Area %  |
|--------|---------------|------|-------------|--------------|--------------|---------|
| 1      | 24.565        | PV   | 0.6994      | 2.23288e4    | 477.60526    | 42.3377 |
| 2      | 26.791        | VV   | 0.7242      | 4372.46973   | 89.47145     | 8.2907  |
| 3      | 29.960        | VV   | 0.8294      | 2.15734e4    | 389.99411    | 40.9053 |
| 4      | 32.555        | VB   | 0.8933      | 4465.14648   | 73.65461     | 8.4664  |

Totals : 5.27398e4 1030.72543

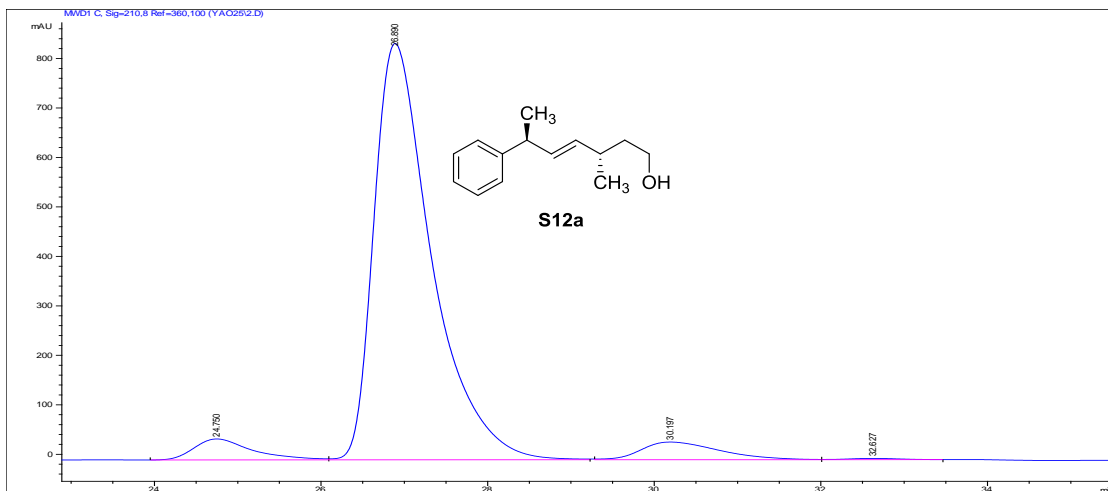

Signal 3: MWD1 C, Sig=210,8 Ref=360,100

| Peak # | RetTime [min] | Type | Width [min] | Area [mAU*s] | Height [mAU] | Area %  |
|--------|---------------|------|-------------|--------------|--------------|---------|
| 1      | 24.750        | PV   | 0.7090      | 2054.13745   | 42.41430     | 4.5667  |
| 2      | 26.890        | VB   | 0.7271      | 4.04784e4    | 841.63153    | 89.9912 |
| 3      | 30.197        | BB   | 0.9230      | 2336.17407   | 35.81300     | 5.1938  |
| 4      | 32.627        | BP   | 0.5309      | 111.70631    | 2.49227      | 0.2483  |

Totals : 4.49804e4 922.35110



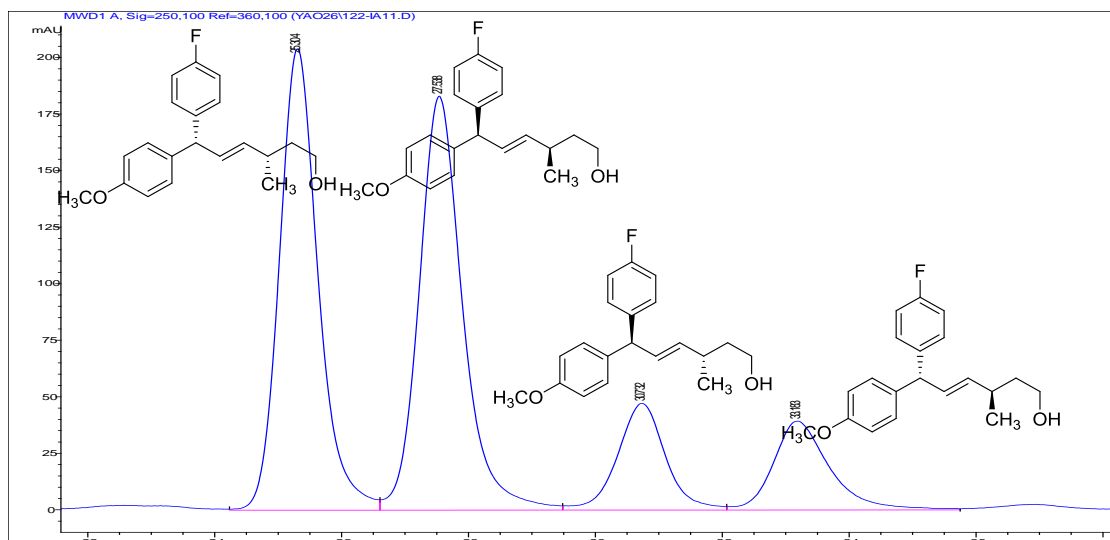

Signal 1: MWD1 A, Sig=250,100 Ref=360,100

| Peak # | RetTime [min] | Type | Width [min] | Area [mAU*s] | Height [mAU] | Area %  |
|--------|---------------|------|-------------|--------------|--------------|---------|
| 1      | 25.304        | VV   | 0.6478      | 8664.09473   | 203.87277    | 38.8938 |
| 2      | 27.538        | VV   | 0.7154      | 8708.48730   | 182.93141    | 39.0931 |
| 3      | 30.732        | VV   | 0.8044      | 2475.82837   | 47.16716     | 11.1142 |
| 4      | 33.183        | VV   | 0.9135      | 2427.89258   | 39.25925     | 10.8990 |

Totals : 2.22763e4 473.23060

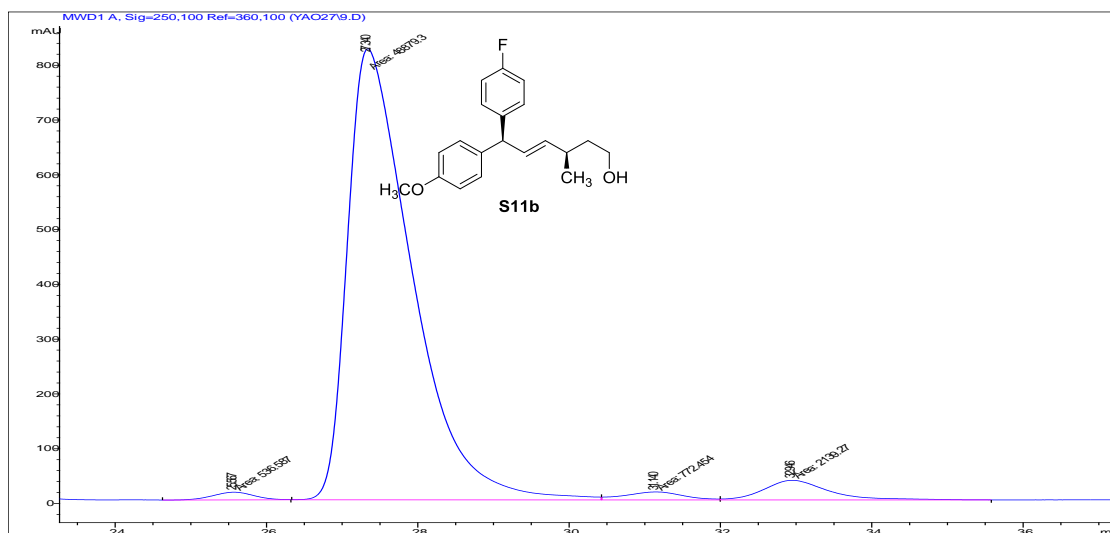

Signal 1: MWD1 A, Sig=250,100 Ref=360,100

| Peak # | RetTime [min] | Type | Width [min] | Area [mAU*s] | Height [mAU] | Area %  |
|--------|---------------|------|-------------|--------------|--------------|---------|
| 1      | 25.567        | MM   | 0.6311      | 536.58716    | 14.17014     | 1.0254  |
| 2      | 27.340        | MF   | 0.9890      | 4.88793e4    | 823.71497    | 93.4102 |
| 3      | 31.140        | MF   | 0.8844      | 772.45441    | 14.55666     | 1.4762  |
| 4      | 32.946        | FM   | 0.9953      | 2139.26880   | 35.82443     | 4.0882  |

Totals : 5.23276e4 888.26619

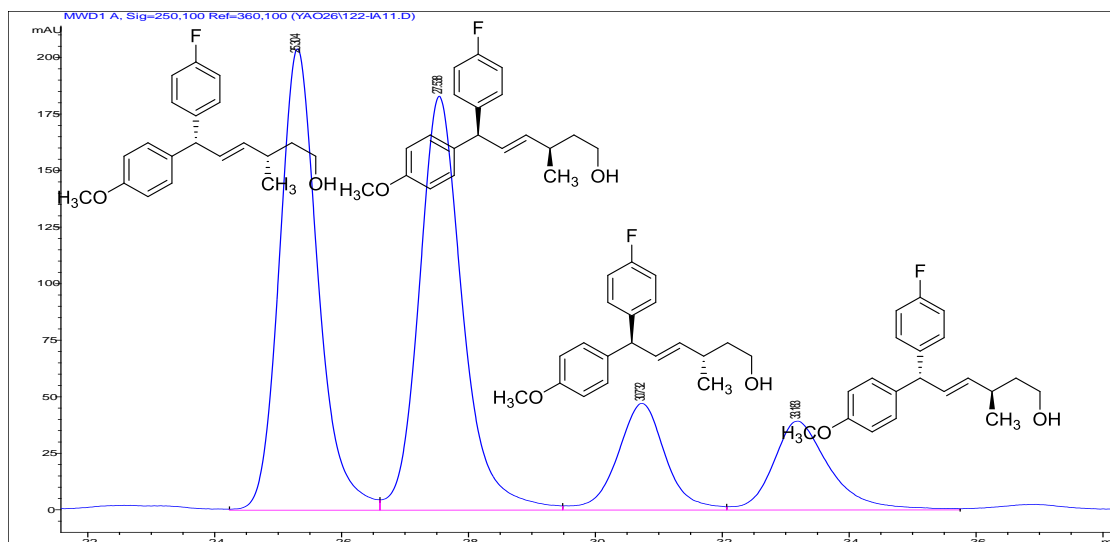

Signal 1: MWD1 A, Sig=250,100 Ref=360,100

| Peak # | RetTime [min] | Type | Width [min] | Area [mAU*s] | Height [mAU] | Area %  |
|--------|---------------|------|-------------|--------------|--------------|---------|
| 1      | 25.304        | VV   | 0.6478      | 8664.09473   | 203.87277    | 38.8938 |
| 2      | 27.538        | VV   | 0.7154      | 8708.48730   | 182.93141    | 39.0931 |
| 3      | 30.732        | VV   | 0.8044      | 2475.82837   | 47.16716     | 11.1142 |
| 4      | 33.183        | VV   | 0.9135      | 2427.89258   | 39.25925     | 10.8990 |

Totals : 2.22763e4 473.23060

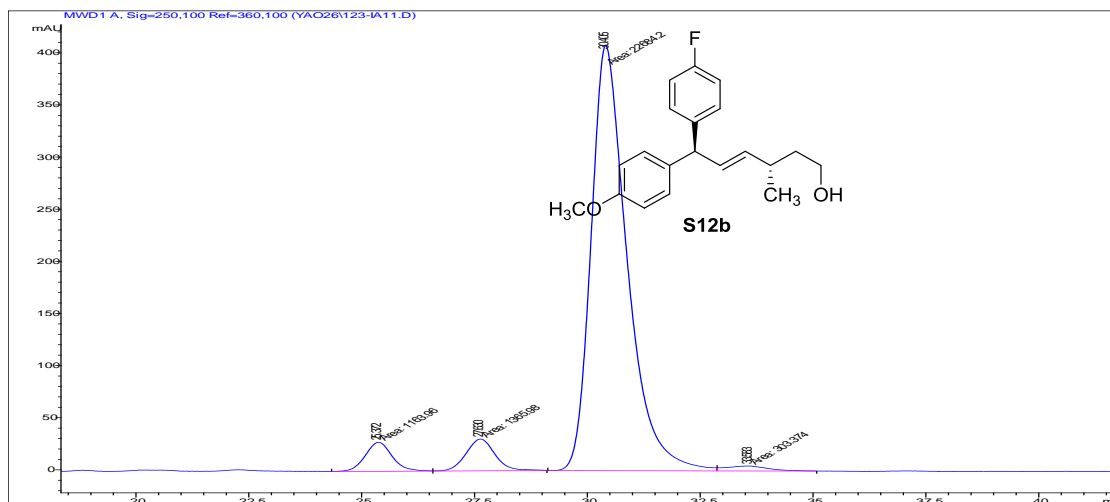

Signal 1: MWD1 A, Sig=250,100 Ref=360,100

| Peak # | RetTime [min] | Type | Width [min] | Area [mAU*s] | Height [mAU] | Area %  |
|--------|---------------|------|-------------|--------------|--------------|---------|
| 1      | 25.372        | MM   | 0.6946      | 1163.96326   | 27.92997     | 4.5614  |
| 2      | 27.630        | MM   | 0.7468      | 1365.98254   | 30.48323     | 5.3531  |
| 3      | 30.405        | MF   | 0.9271      | 2.26842e4    | 407.79678    | 88.8966 |
| 4      | 33.583        | FM   | 1.0621      | 303.37387    | 4.76062      | 1.1889  |

Totals : 2.55175e4 470.97060

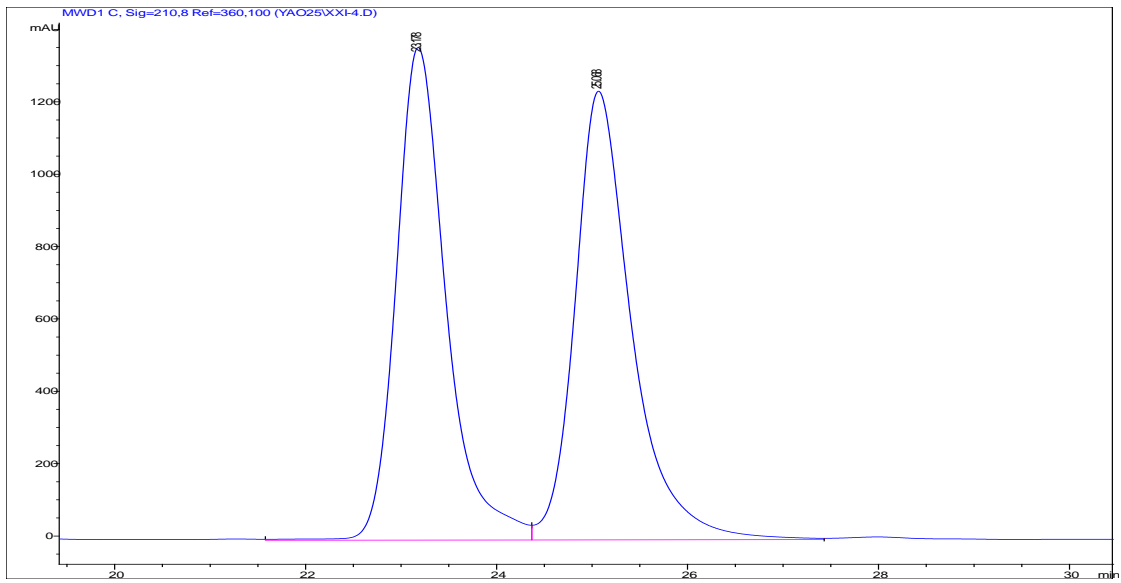

Signal 3: MWD1 C, Sig=210,8 Ref=360,100

| Peak #   | RetTime [min] | Type | Width [min] | Area [mAU*s] | Height [mAU] | Area %  |
|----------|---------------|------|-------------|--------------|--------------|---------|
| 1        | 23.178        | VV   | 0.5499      | 4.94659e4    | 1361.50232   | 49.1396 |
| 2        | 25.068        | VB   | 0.6137      | 5.11982e4    | 1240.06226   | 50.8604 |
| Totals : |               |      |             | 1.00664e5    | 2601.56458   |         |

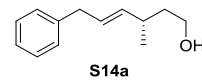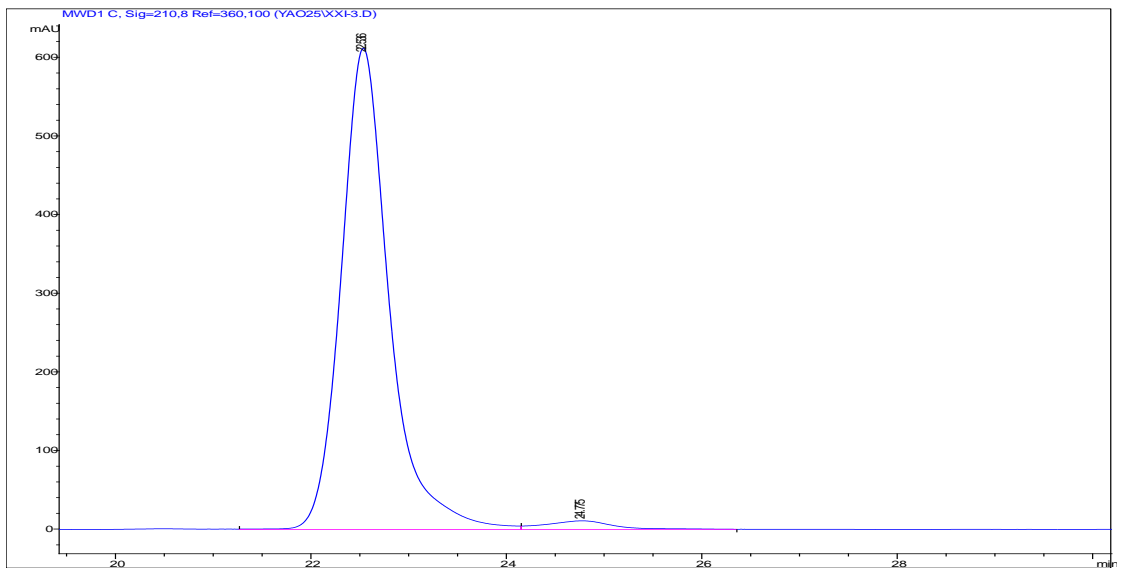

Signal 3: MWD1 C, Sig=210,8 Ref=360,100

| Peak #   | RetTime [min] | Type | Width [min] | Area [mAU*s] | Height [mAU] | Area %  |
|----------|---------------|------|-------------|--------------|--------------|---------|
| 1        | 22.536        | BV   | 0.5116      | 2.09649e4    | 612.05121    | 97.5614 |
| 2        | 24.775        | VV   | 0.5973      | 524.03821    | 10.93197     | 2.4386  |
| Totals : |               |      |             | 2.14890e4    | 622.98318    |         |

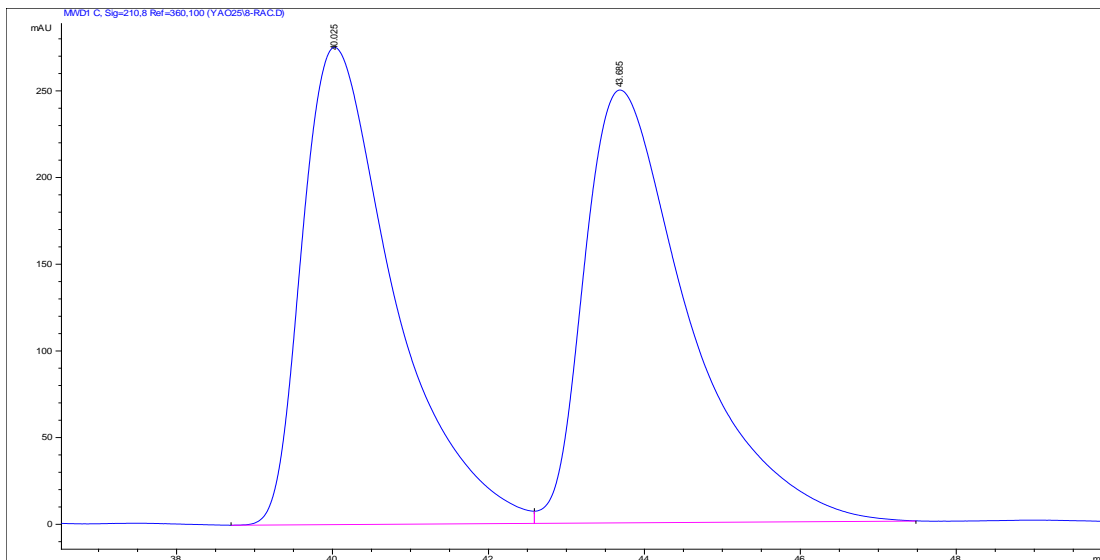

Signal 3: MWD1 C, Sig=210,8 Ref=360,100

| Peak #   | RetTime [min] | Type | Width [min] | Area [mAU*s] | Height [mAU] | Area %  |
|----------|---------------|------|-------------|--------------|--------------|---------|
| 1        | 40.025        | PV   | 1.2239      | 2.25071e4    | 275.27460    | 49.2940 |
| 2        | 43.685        | VB   | 1.3760      | 2.31518e4    | 249.64015    | 50.7060 |
| Totals : |               |      |             | 4.56589e4    | 524.91475    |         |

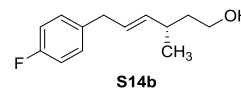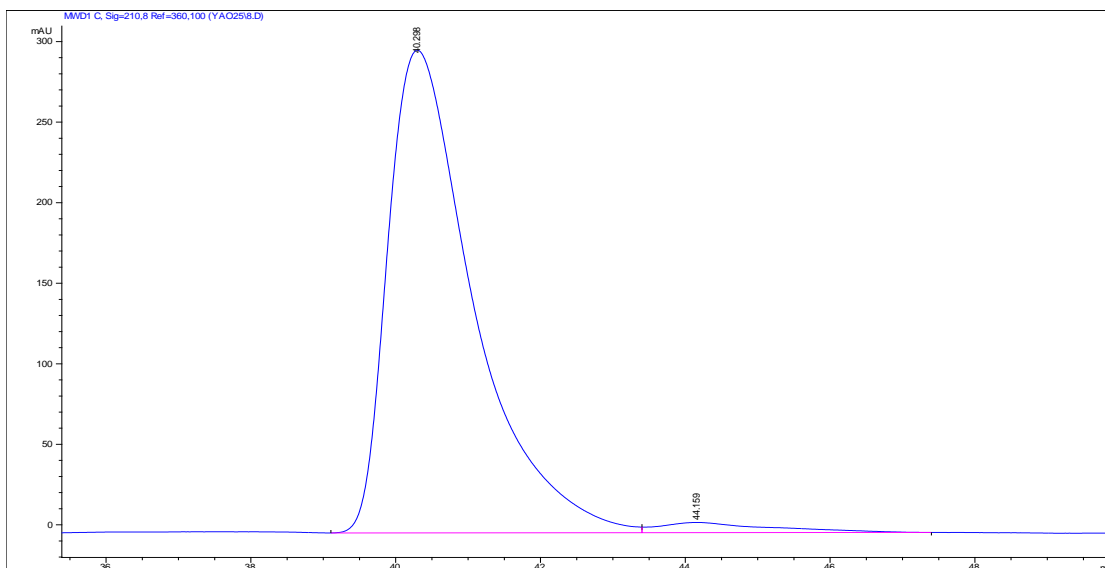

Signal 3: MWD1 C, Sig=210,8 Ref=360,100

| Peak #   | RetTime [min] | Type | Width [min] | Area [mAU*s] | Height [mAU] | Area %  |
|----------|---------------|------|-------------|--------------|--------------|---------|
| 1        | 40.298        | PV   | 1.2228      | 2.45793e4    | 299.69809    | 97.2982 |
| 2        | 44.159        | VV   | 1.2648      | 682.52643    | 6.33566      | 2.7018  |
| Totals : |               |      |             | 2.52618e4    | 306.03375    |         |

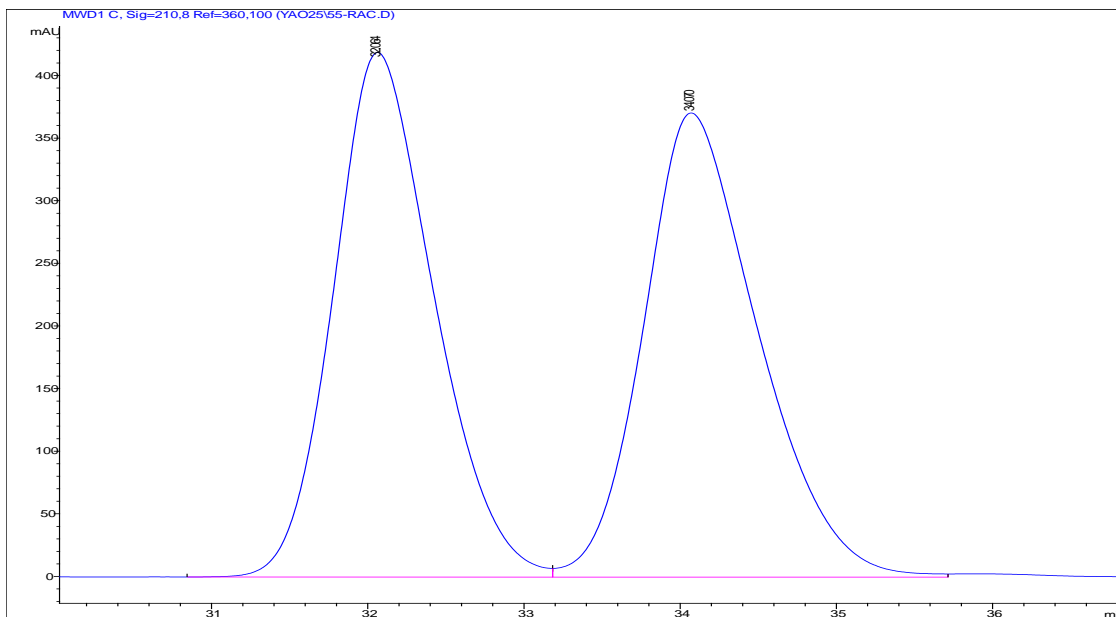

Signal 3: MWD1 C, Sig=210,8 Ref=360,100

| Peak #   | RetTime [min] | Type | Width [min] | Area [mAU*s] | Height [mAU] | Area %  |
|----------|---------------|------|-------------|--------------|--------------|---------|
| 1        | 32.064        | VV   | 0.6805      | 1.87636e4    | 418.94101    | 49.8345 |
| 2        | 34.070        | VB   | 0.7466      | 1.88883e4    | 370.62140    | 50.1655 |
| Totals : |               |      |             | 3.76519e4    | 789.56241    |         |

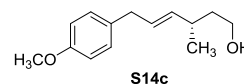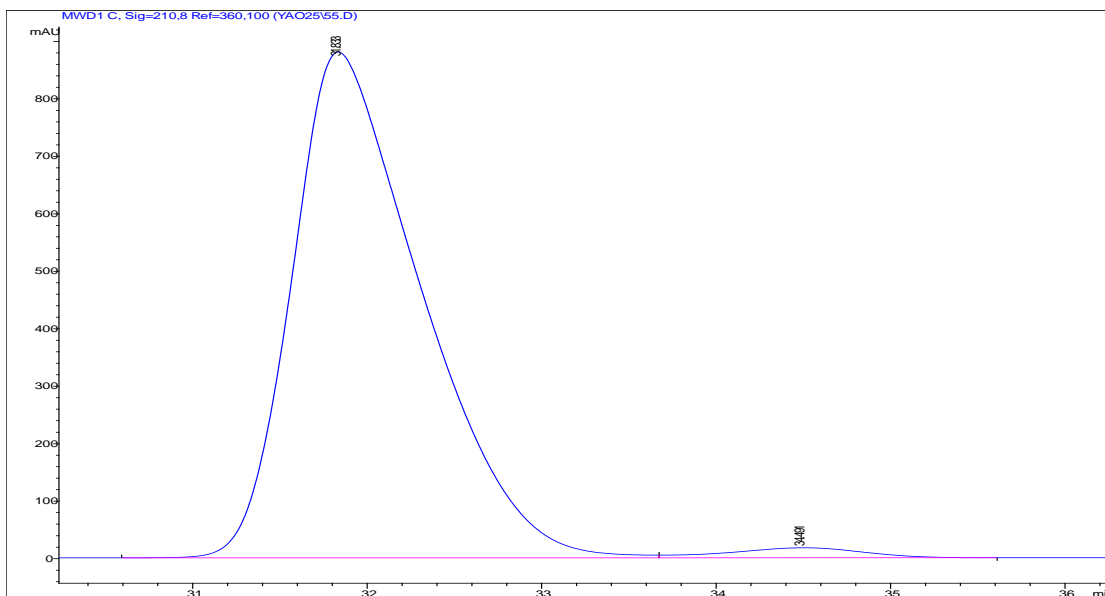

Signal 3: MWD1 C, Sig=210,8 Ref=360,100

| Peak #   | RetTime [min] | Type | Width [min] | Area [mAU*s] | Height [mAU] | Area %  |
|----------|---------------|------|-------------|--------------|--------------|---------|
| 1        | 31.833        | PV   | 0.7257      | 4.53907e4    | 880.13147    | 98.0111 |
| 2        | 34.491        | VP   | 0.6548      | 921.07812    | 17.36454     | 1.9889  |
| Totals : |               |      |             | 4.63118e4    | 897.49601    |         |

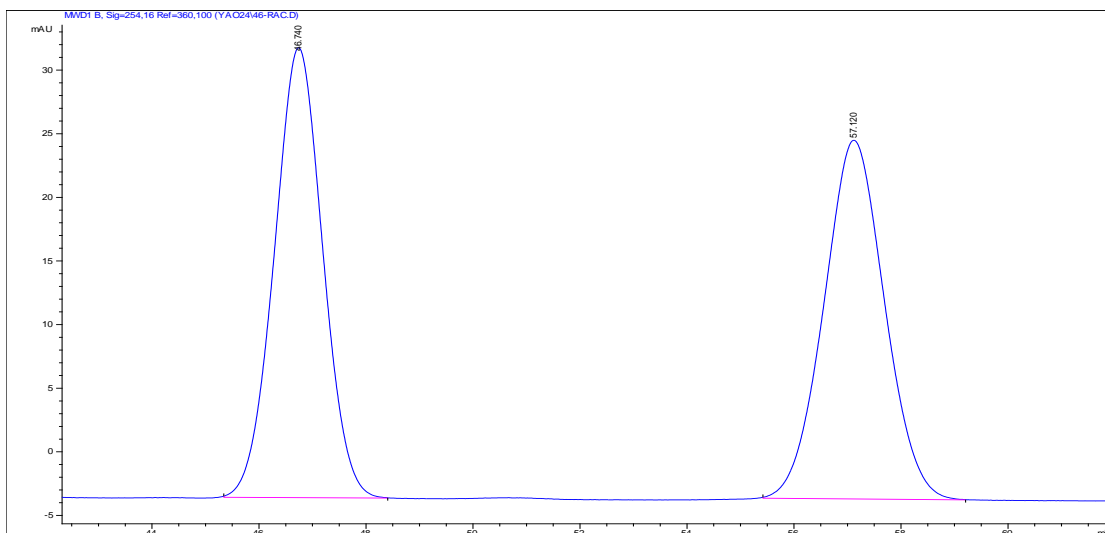

Signal 2: MWD1 B, Sig=254,16 Ref=360,100

| Peak #   | RetTime [min] | Type | Width [min] | Area [mAU*s] | Height [mAU] | Area %  |
|----------|---------------|------|-------------|--------------|--------------|---------|
| 1        | 46.740        | BB   | 0.9423      | 2225.61890   | 35.35958     | 50.0586 |
| 2        | 57.120        | BB   | 1.1511      | 2220.40747   | 28.18368     | 49.9414 |
| Totals : |               |      |             | 4446.02637   | 63.54325     |         |

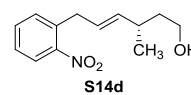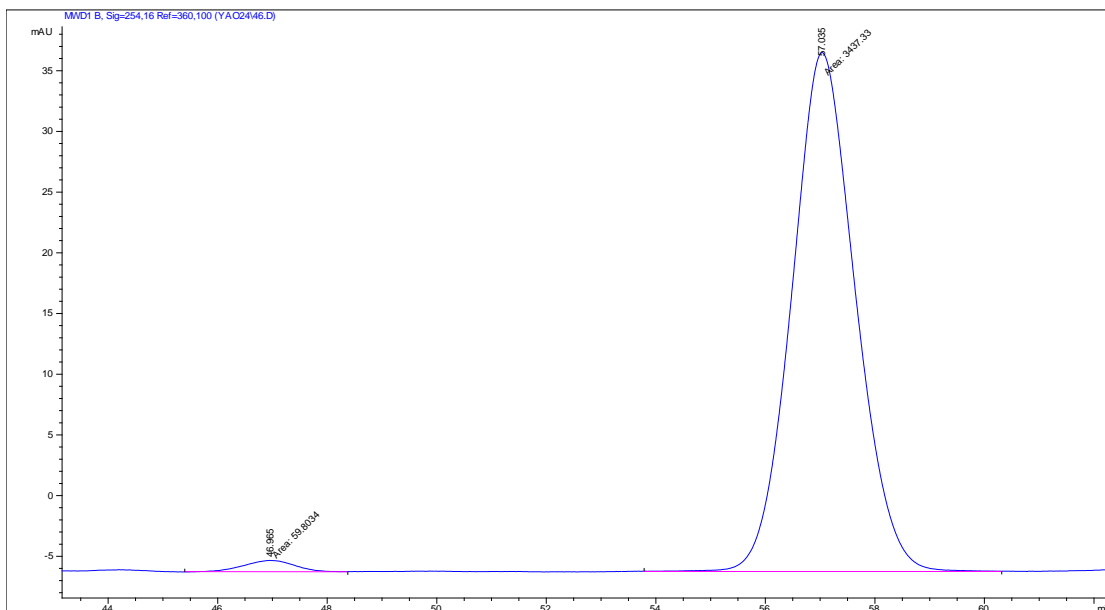

Signal 2: MWD1 B, Sig=254,16 Ref=360,100

| Peak #   | RetTime [min] | Type | Width [min] | Area [mAU*s] | Height [mAU] | Area %  |
|----------|---------------|------|-------------|--------------|--------------|---------|
| 1        | 46.965        | MM   | 1.0778      | 59.80341     | 9.24772e-1   | 1.7101  |
| 2        | 57.035        | MM   | 1.3404      | 3437.32666   | 42.73948     | 98.2899 |
| Totals : |               |      |             | 3497.13007   | 43.66425     |         |

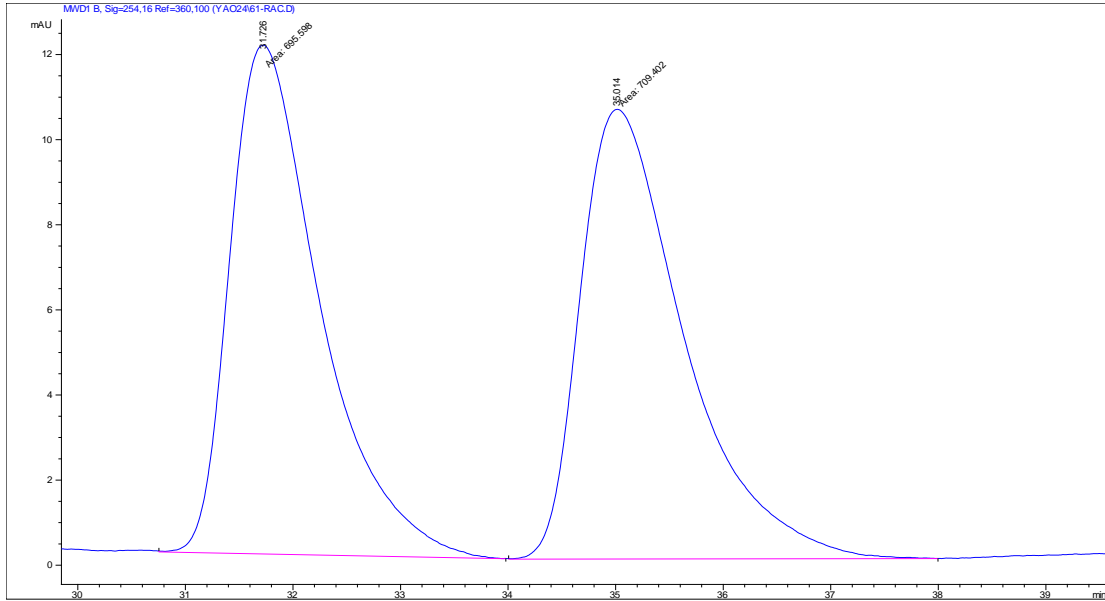

Signal 2: MWD1 B, Sig=254,16 Ref=360,100

| Peak #   | RetTime [min] | Type | Width [min] | Area [mAU*s] | Height [mAU] | Area %  |
|----------|---------------|------|-------------|--------------|--------------|---------|
| 1        | 31.726        | MM   | 0.9696      | 695.59833    | 11.95682     | 49.5088 |
| 2        | 35.014        | MM   | 1.1188      | 709.40228    | 10.56825     | 50.4912 |
| Totals : |               |      |             | 1405.00061   | 22.52507     |         |

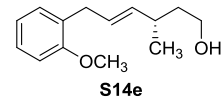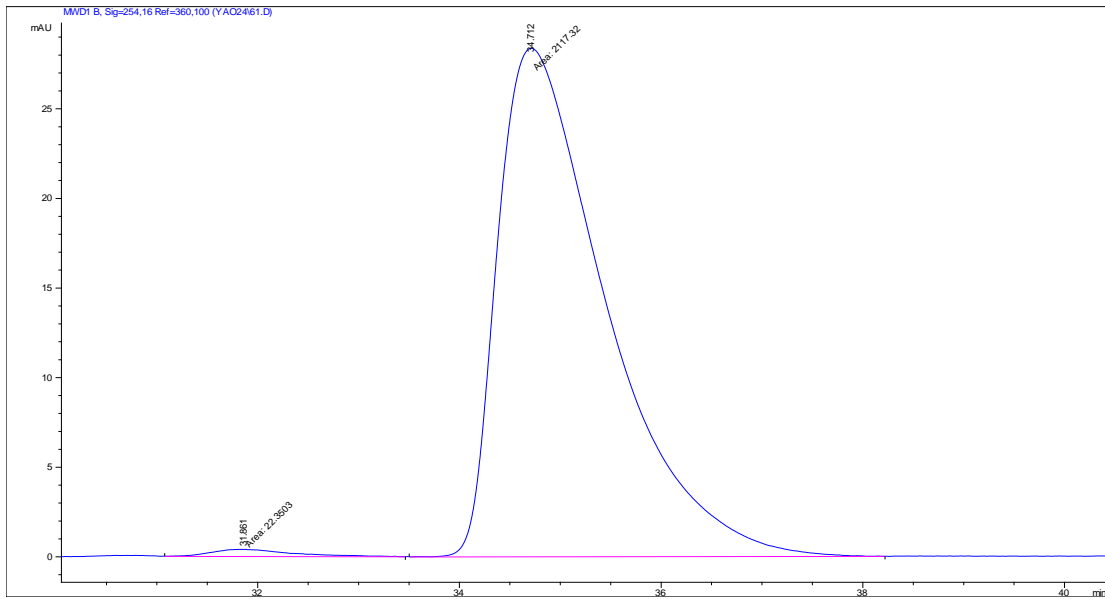

Signal 2: MWD1 B, Sig=254,16 Ref=360,100

| Peak #   | RetTime [min] | Type | Width [min] | Area [mAU*s] | Height [mAU] | Area %  |
|----------|---------------|------|-------------|--------------|--------------|---------|
| 1        | 31.861        | MM   | 0.9387      | 22.35028     | 3.96818e-1   | 1.0446  |
| 2        | 34.712        | MM   | 1.2437      | 2117.32495   | 28.37493     | 98.9554 |
| Totals : |               |      |             | 2139.67523   | 28.77175     |         |

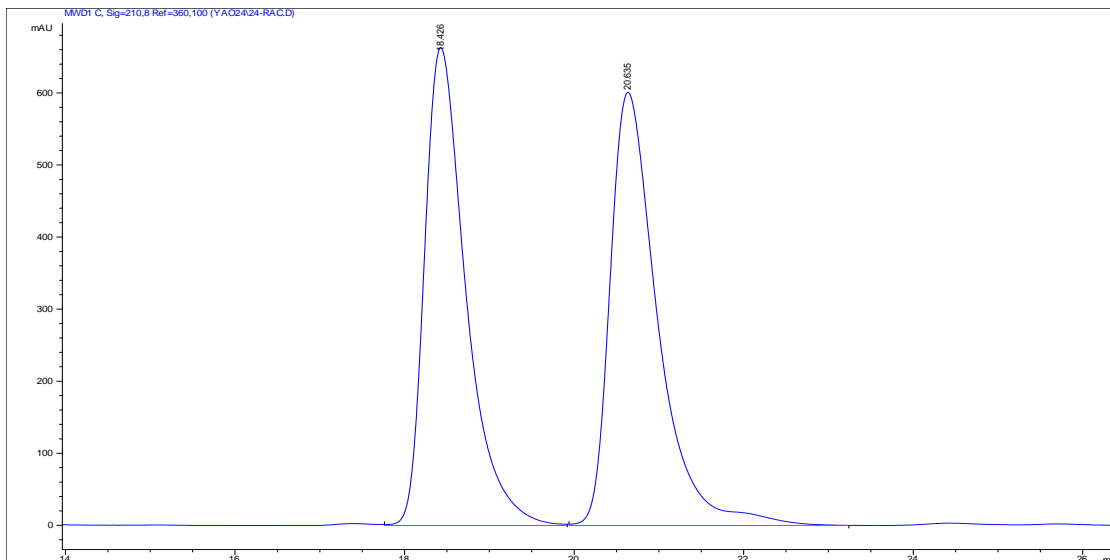

Signal 3: MWD1 C, Sig=210,8 Ref=360,100

| Peak #   | RetTime [min] | Type | Width [min] | Area [mAU*s] | Height [mAU] | Area %  |
|----------|---------------|------|-------------|--------------|--------------|---------|
| 1        | 18.426        | VB   | 0.5125      | 2.24316e4    | 663.37885    | 48.8792 |
| 2        | 20.635        | BB   | 0.5914      | 2.34603e4    | 601.00964    | 51.1208 |
| Totals : |               |      |             | 4.58919e4    | 1264.38849   |         |

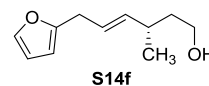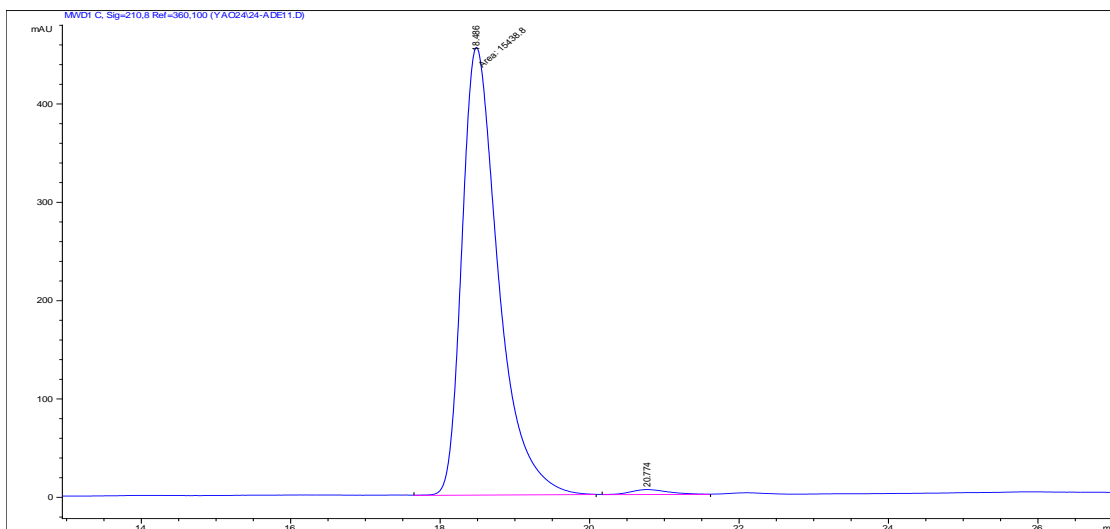

Signal 3: MWD1 C, Sig=210,8 Ref=360,100

| Peak #   | RetTime [min] | Type | Width [min] | Area [mAU*s] | Height [mAU] | Area %  |
|----------|---------------|------|-------------|--------------|--------------|---------|
| 1        | 18.486        | MM   | 0.5652      | 1.54388e4    | 455.29068    | 98.8576 |
| 2        | 20.774        | BV   | 0.4471      | 178.40811    | 5.01487      | 1.1424  |
| Totals : |               |      |             | 1.56172e4    | 460.30555    |         |



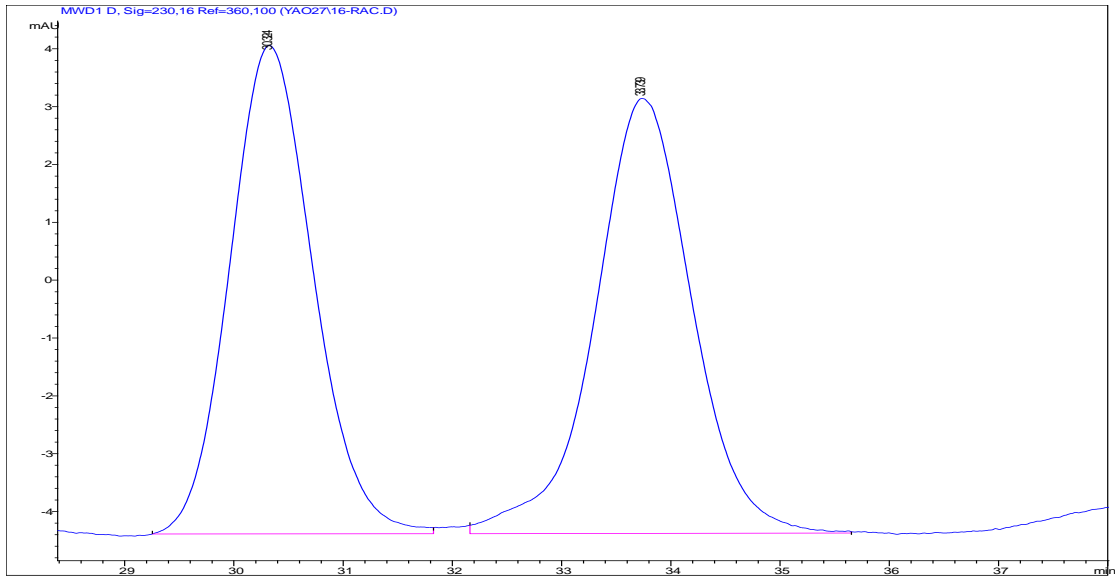

Signal 4: MWD1 D, Sig=230,16 Ref=360,100

| Peak #   | RetTime [min] | Type | Width [min] | Area [mAU*s] | Height [mAU] | Area %  |
|----------|---------------|------|-------------|--------------|--------------|---------|
| 1        | 30.324        | BB   | 0.8268      | 447.94687    | 8.44604      | 49.0595 |
| 2        | 33.739        | BB   | 0.9456      | 465.12256    | 7.52049      | 50.9405 |
| Totals : |               |      |             | 913.06943    | 15.96653     |         |

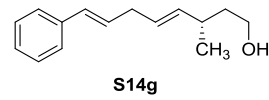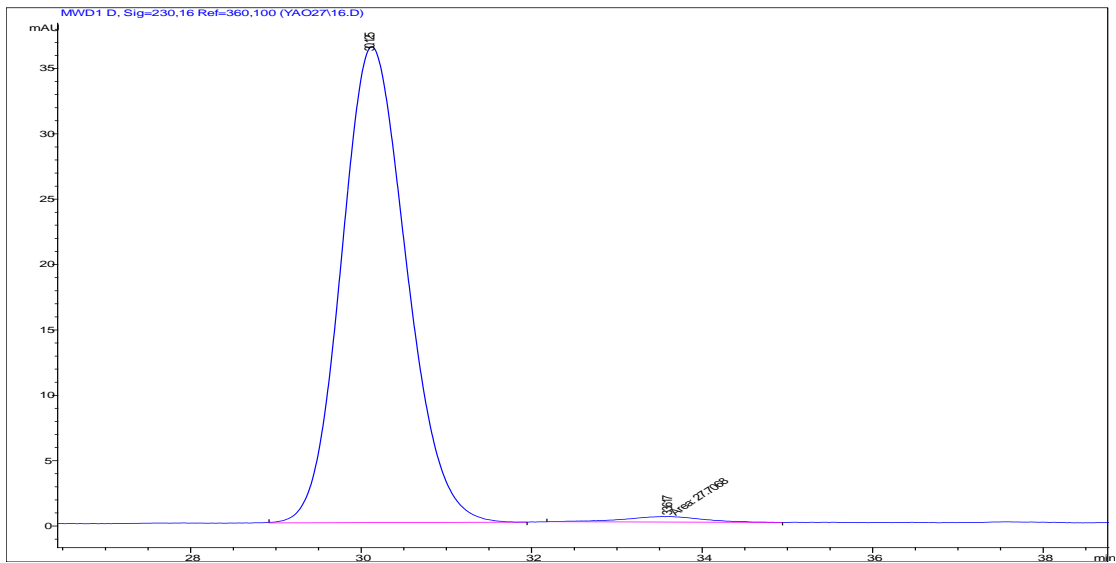

Signal 4: MWD1 D, Sig=230,16 Ref=360,100

| Peak #   | RetTime [min] | Type | Width [min] | Area [mAU*s] | Height [mAU] | Area %  |
|----------|---------------|------|-------------|--------------|--------------|---------|
| 1        | 30.125        | BP   | 0.8264      | 1929.18689   | 36.39350     | 98.5841 |
| 2        | 33.617        | MM   | 1.0722      | 27.70685     | 4.30694e-1   | 1.4159  |
| Totals : |               |      |             | 1956.89374   | 36.82420     |         |

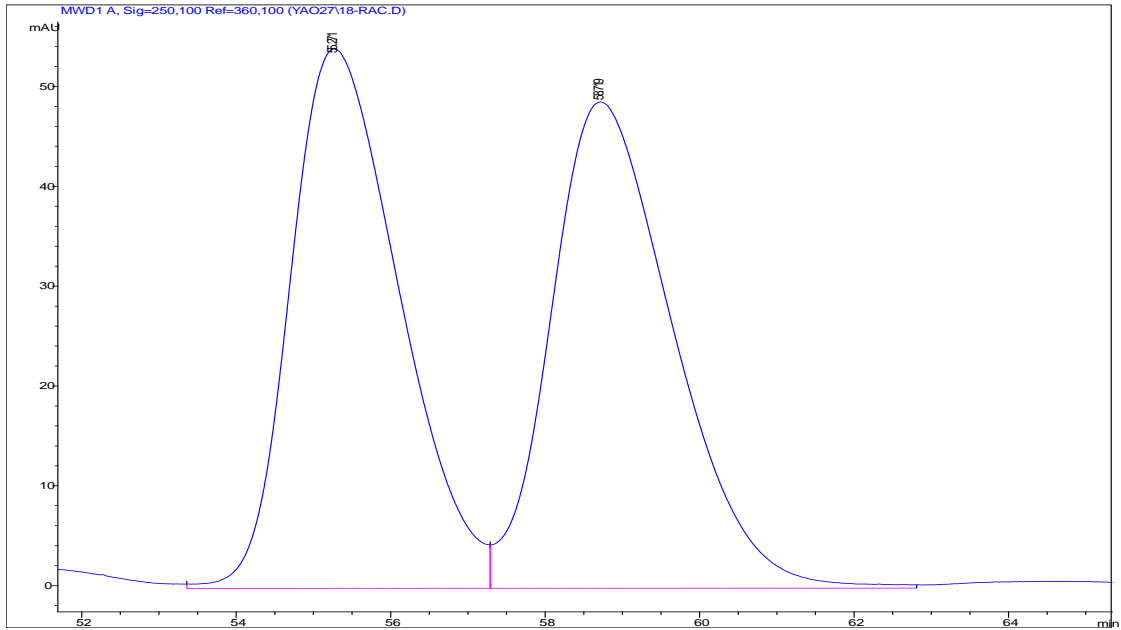

Signal 1: MWD1 A, Sig=250,100 Ref=360,100

| Peak #   | RetTime [min] | Type | Width [min] | Area [mAU*s] | Height [mAU] | Area %  |
|----------|---------------|------|-------------|--------------|--------------|---------|
| 1        | 55.271        | VV   | 1.5107      | 5292.55957   | 54.03773     | 49.7665 |
| 2        | 58.719        | VB   | 1.6635      | 5342.23438   | 48.71211     | 50.2335 |
| Totals : |               |      |             | 1.06348e4    | 102.74984    |         |

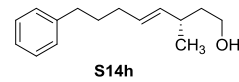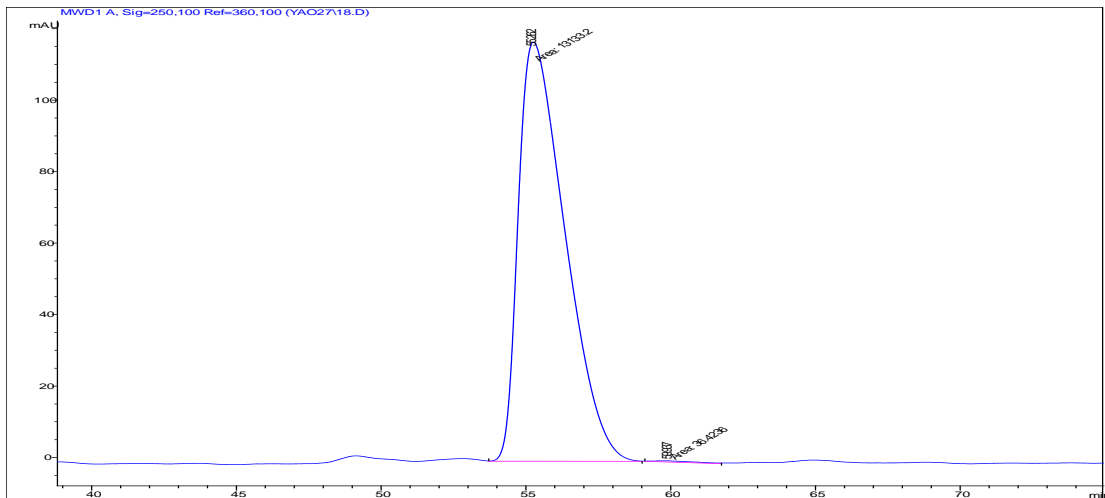

Signal 1: MWD1 A, Sig=250,100 Ref=360,100

| Peak #   | RetTime [min] | Type | Width [min] | Area [mAU*s] | Height [mAU] | Area %  |
|----------|---------------|------|-------------|--------------|--------------|---------|
| 1        | 55.262        | MM   | 1.8660      | 1.31332e4    | 117.30078    | 99.7234 |
| 2        | 59.937        | MM   | 1.7549      | 36.42359     | 3.45926e-1   | 0.2766  |
| Totals : |               |      |             | 1.31696e4    | 117.64671    |         |
